# Supplementary material for: Efficient CRISPR/Cas9 genome editing in a salmonid fish cell line using a lentivirus delivery system
Source: BMC Biotechnol. 2020 Jun 23;20:35. doi: 10.1186/s12896-020-00626-x (PMC7310381; doi:10.1186/s12896-020-00626-x)
Supplement: Supplementary file 4 — Additional file 4 Table S1. Predicted Off-target sites. List of all predicted off-targets from CRISPOR website for 354 bp in RIG-I exon 2 (Tab1). The selected gRNA is labeled 224 forw and the list of off-targets can be found lines 2127–2240. Tab2 summarises the predicted off-targets for gRNA 224 forw. The sum of the two off-target scores (MIT and CDF) were calculated to rank the results. The 2 targets selected are highlighted. [file 12896_2020_626_MOESM4_ESM.xls]

## Sheet: all_RIG-I_offtarget
# Genome	GCF_002872995.1
# Name
# PAM	NGG	224forw
# Position	NW_020130141.1:206129-206483:+
# Results	http://crispor.org/crispor.py?batchId=p3QqXlKgbk37XQRAppyb
# Sequence	tagaaagtgtcaaagtacagcaattctagcttttctgcccttattccgctttacggtctctcctccccctctcatttcacatgtaggatacattgtagtcatttagcagacacagggacttccagcagcaatttgctcaagtgagctcttagtcgctaggcaacctttcctcttcttctcctgaaatgaacctttggtgttccgcgttCCAGAGGTTGCAGAGAGGATCCTATCAGAGGAGAGTAAGTCTGTGACGGCAGCAGCCCAGGTGTTTCTAGACCAGGTGTGTCTCCTGGACGAACTGGGATGGTACCAGGCCCTGCTAGATGCCCTGGAAGCAGAaggtgtgtgtgt
# Version	CRISPOR 4.95, 2019-10-23T16:43:41CEST
114forw	TGTAGTCATTTAGCAGACACAGG	TGGAGACACATAGCAGACACAGG	..*..*..**..........	4	0.458192	0.342857	NW_020130030.1	122917	122939	+	intergenic:LOC112239491-XM_024407945.1
114forw	TGTAGTCATTTAGCAGACACAGG	TGGAGACACATAGCAGACACAGG	..*..*..**..........	4	0.458192	0.342857	NC_037108.1	40262108	40262130	-	intergenic:XM_024439506.1-XM_024439511.1/XM_024439510.1/XM_024439508.1/XM_024439507.1
114forw	TGTAGTCATTTAGCAGACACAGG	TAAAGTCAGATAGCAGACACTGG	.**.....**..........	4	0.757342	0.3207	NC_037126.1	6513691	6513713	-	intergenic:XM_024393527.1-XM_024393526.1
114forw	TGTAGTCATTTAGCAGACACAGG	TTTACTTATTTGGCAGACACTGG	.*..*.*....*........	4	0.480774	0.293403	NC_037117.1	15556469	15556491	-	intergenic:XM_024383057.1-XM_024383060.1/XM_024383058.1
114forw	TGTAGTCATTTAGCAGACACAGG	TATTGTCATCTAACAGACACAGG	.*.*.....*..*.......	4	0.509948	0.265089	NC_037123.1	15008843	15008865	+	intron:XM_024389878.1
114forw	TGTAGTCATTTAGCAGACACAGG	TGTAGACTTTAAACAGACACCGG	.....*.*..*.*.......	4	0.177367	0.257143	NC_037130.1	464017	464039	-	intergenic:XM_024398362.1-XM_024398364.1
114forw	TGTAGTCATTTAGCAGACACAGG	TTTTGTAATTAAGCAGACACTGG	.*.*..*...*.........	4	0.542337	0.227789	NC_037102.1	42461996	42462018	+	intergenic:XM_024424094.1-XM_024424095.1
114forw	TGTAGTCATTTAGCAGACACAGG	TGCAGTCATACAACAGACACAGG	..*......**.*.......	4	0.279059	0.22606	NC_037122.1	2353591	2353613	-	intergenic:XR_002949530.1-XM_024388640.1
114forw	TGTAGTCATTTAGCAGACACAGG	TGTAGTCAATAAGCAGATAAGGG	........*.*......*.*	4	0.0396535	0.223852	NW_020130905.1	27459	27481	-	exon:XM_024409072.1
114forw	TGTAGTCATTTAGCAGACACAGG	AGTAGTCCTATAGCAGACAAAGG	*......*.*.........*	4	0.642349	0.183673	NC_037111.1	27859919	27859941	-	intron:XM_024373645.1/XM_024373644.1/XM_024373642.1/XM_024373641.1/XM_024373640.1/XM_024373639.1/XM_024373638.1/XM_024373637.1/XM_024373636.1/XM_024373635.1/XM_024373634.1/XM_024373633.1/XM_024373632.1/XM_024373631.1/XM_024373630.1/XM_024373629.1/XM_024373628.1/XM_024373626.1/XM_024373625.1/XM_024373624.1/XM_024373623.1/XM_024373622.1/XM_024373621.1/XM_024373620.1/XM_024373619.1/XM_024373618.1/XM…
114forw	TGTAGTCATTTAGCAGACACAGG	GGACGTCATTAAGCAGACACTGG	*.**......*.........	4	0.782934	0.180855	NC_037110.1	36385978	36386000	-	intergenic:XM_024445132.1/XM_024445131.1-XM_024445134.1
114forw	TGTAGTCATTTAGCAGACACAGG	ATGAGTCATTTAGCAGAAACAGG	***..............*..	4	0.305989	0.171329	NC_037118.1	21928296	21928318	+	intergenic:XM_024384653.1/XM_024384656.1-XM_024384654.1
114forw	TGTAGTCATTTAGCAGACACAGG	TTTAGCCATTCAGCAGACGCTGG	.*...*....*.......*.	4	0.167468	0.144628	NC_037108.1	13530563	13530585	-	intergenic:XM_024438343.1/XM_024438346.1/XM_024438345.1-XM_024438345.1/XM_024438343.1/XM_024438346.1
114forw	TGTAGTCATTTAGCAGACACAGG	TTTAGCCATTCAGCAGACGCTGG	.*...*....*.......*.	4	0.167468	0.144628	NC_037109.1	49470274	49470296	-	intergenic:XM_024442545.1/XM_024442547.1/XM_024442546.1-XM_024442546.1/XM_024442545.1/XM_024442547.1
114forw	TGTAGTCATTTAGCAGACACAGG	TTTAGCCATTTAGCAGATGCTGG	.*...*...........**.	4	0.0591418	0.139463	NC_037103.1	73364358	73364380	-	intergenic:XM_024427949.1/XM_024427950.1-XM_024428506.1
114forw	TGTAGTCATTTAGCAGACACAGG	TTTAGTCATTTGTCAAACACTGG	.*.........**..*....	4	0.0492279	0.137879	NC_037098.1	46849198	46849220	-	intergenic:XM_024382256.1-XM_024382285.1/XM_024382295.1/XM_024382275.1
114forw	TGTAGTCATTTAGCAGACACAGG	TGTAGTCTTTTAACAGATAAGGG	.......*....*....*.*	4	0.0475455	0.127159	NC_037116.1	30652311	30652333	-	intergenic:XR_002948803.1-XM_024381260.1
114forw	TGTAGTCATTTAGCAGACACAGG	TGTAGTCATTTGTCAAACTCTGG	...........**..*..*.	4	0.0140809	0.116667	NW_020142494.1	1404033	1404055	+	intergenic:XM_024412347.1-XM_024412346.1
114forw	TGTAGTCATTTAGCAGACACAGG	TGTAGTCATTTAGAGAACAATGG	.............***...*	4	0.00390931	0.11375	NW_020142595.1	497117	497139	+	intergenic:XM_024415998.1-XM_024415999.1
114forw	TGTAGTCATTTAGCAGACACAGG	TGTAGTCATTTAGAGAACAATGG	.............***...*	4	0.00390931	0.11375	NW_020129099.1	12977	12999	-	intergenic:Gap-XM_024405375.1
114forw	TGTAGTCATTTAGCAGACACAGG	TGTTGTCATCAACCAGACACCGG	...*.....**.*.......	4	0.283021	0.107177	NC_037129.1	1487689	1487711	+	intergenic:XM_024397023.1-XM_024397027.1
114forw	TGTAGTCATTTAGCAGACACAGG	TGTAATCATGTCACAGACACAGG	....*....*.**.......	4	0.239359	0.105263	NC_037121.1	24602786	24602808	+	intron:XM_024388111.1
114forw	TGTAGTCATTTAGCAGACACAGG	TGTATTTATATAGCAGACAAGGG	....*.*..*.........*	4	0.415326	0.104464	NW_020129262.1	43695	43717	+	intergenic:LOC112237507-XM_024406108.1/XM_024406107.1/XM_024406106.1/XM_024406105.1/XM_024406104.1
114forw	TGTAGTCATTTAGCAGACACAGG	TTTAGACATTTAGAAGAAACGGG	.*...*.......*...*..	4	0.027975	0.103939	NC_037109.1	21506728	21506750	+	intergenic:XM_024441422.1-LOC112264667
114forw	TGTAGTCATTTAGCAGACACAGG	TGTATTCACTCAGCAGACTCTGG	....*...*.*.......*.	4	0.160565	0.0994083	NC_037115.1	52921954	52921976	-	intergenic:XM_024380185.1-XM_024380278.1
114forw	TGTAGTCATTTAGCAGACACAGG	TGTTGCCTTTTTGCAGACACTGG	...*.*.*...*........	4	0.406289	0.0826446	NC_037103.1	70683037	70683059	+	exon:XM_024427847.1
114forw	TGTAGTCATTTAGCAGACACAGG	TTTAGTCATTGAGCAGATAAGGG	.*........*......*.*	4	0.0758683	0.0818182	NW_020131217.1	16893	16915	-	intergenic:Gap-XM_024409342.1/XM_024409341.1/XM_024409340.1
114forw	TGTAGTCATTTAGCAGACACAGG	TGTATACATTTTACAGACACAGG	....**.....**.......	4	0.157234	0.08	NC_037108.1	14979827	14979849	+	intergenic:LOC112262700-XM_024438399.1
114forw	TGTAGTCATTTAGCAGACACAGG	TGTATACATTTTACAGACACAGG	....**.....**.......	4	0.157234	0.08	NC_037109.1	50919538	50919560	+	intergenic:LOC112265377-XM_024443577.1
114forw	TGTAGTCATTTAGCAGACACAGG	TTTAGTAATTTAGCAGACTTTGG	.*....*...........**	4	0.150052	0.0770979	NC_037101.1	83325212	83325234	-	intron:XM_024422305.1
114forw	TGTAGTCATTTAGCAGACACAGG	TCTAGTCATTGAGCCAACACTGG	.*........*...**....	4	0.0384559	0.0755245	NC_037108.1	35524299	35524321	+	intergenic:XM_024440712.1-XM_024440714.1
114forw	TGTAGTCATTTAGCAGACACAGG	TCTAGTCATTGAGCCAACACTGG	.*........*...**....	4	0.0384559	0.0755245	NC_037099.1	8178302	8178324	+	intergenic:XM_024412138.1-XM_024412146.1
114forw	TGTAGTCATTTAGCAGACACAGG	TGTAGTACTTTTGCAGATACAGG	......**...*.....*..	4	0.0942318	0.0688776	NC_037103.1	73447086	73447108	-	intron:LOC112255334
114forw	TGTAGTCATTTAGCAGACACAGG	TGTAGTGTTTGAGTAGACACAGG	......**..*..*......	4	0.0770929	0.0591597	NC_037124.1	16789308	16789330	+	intron:XM_024391450.1
114forw	TGTAGTCATTTAGCAGACACAGG	AGTAGTGATTTAACAGTCACAGG	*.....*.....*...*...	4	0.161126	0.0579186	NW_020129958.1	57332	57354	-	intergenic:XM_024407834.1-Gap
114forw	TGTAGTCATTTAGCAGACACAGG	TTGAGTCATTCCGCAGACACAGG	.**.......**........	4	0.385204	0.0558214	NW_020129389.1	57143	57165	-	intergenic:XR_002951523.1-XM_024406587.1
114forw	TGTAGTCATTTAGCAGACACAGG	TTTAGTCATTTAGCAGAATTAGG	.*...............***	4	0.0430604	0.0553523	NC_037111.1	3548120	3548142	-	intron:XM_024374029.1
114forw	TGTAGTCATTTAGCAGACACAGG	TGTAATGAATTAGCAGAGACCGG	....*.*.*........*..	4	0.122949	0.0504949	NW_020128906.1	496806	496828	-	intergenic:XM_024403989.1-XM_024403992.1/XM_024403991.1/XM_024403990.1
114forw	TGTAGTCATTTAGCAGACACAGG	TGTTGTGATTTAACAGCCACGGG	...*..*.....*...*...	4	0.152967	0.0487817	NC_037106.1	33948463	33948485	-	intergenic:XM_024435404.1/XM_024435403.1-XM_024435410.1/XM_024435408.1/XM_024435407.1/XM_024435406.1/XM_024435405.1
114forw	TGTAGTCATTTAGCAGACACAGG	GGCAGTCATTTAGCAGGTACAGG	*.*.............**..	4	0.117806	0.0465056	NW_020128810.1	3365065	3365087	-	intron:XM_024400229.1/XM_024400228.1/XM_024400227.1/XM_024400226.1/XM_024400225.1/XM_024400223.1/XM_024400222.1/XM_024400221.1/XM_024400220.1/XM_024400219.1/XM_024400218.1/XM_024400217.1/XM_024400216.1/XM_024400215.1/XM_024400214.1/XM_024400212.1/XM_024400211.1
114forw	TGTAGTCATTTAGCAGACACAGG	GGCAGTCATTTAGCAGGTACAGG	*.*.............**..	4	0.117806	0.0465056	NW_020142548.1	1115318	1115340	-	intron:XM_024415472.1/XM_024415471.1/XM_024415470.1/XM_024415469.1/XM_024415467.1/XM_024415466.1/XM_024415465.1/XM_024415464.1/XM_024415463.1/XM_024415462.1/XM_024415461.1/XM_024415460.1/XM_024415459.1/XM_024415458.1/XM_024415457.1/XM_024415456.1/XM_024415455.1
114forw	TGTAGTCATTTAGCAGACACAGG	TGTAGACATCAAGCAGAGACAGG	.....*...**......*..	4	0.091111	0.0462222	NC_037098.1	18586255	18586277	-	intergenic:XM_024445742.1-XM_024385383.1
114forw	TGTAGTCATTTAGCAGACACAGG	TGTAGTGATTTAGCAACCTCAGG	......*........**.*.	4	0.0214154	0.0447165	NC_037102.1	52811423	52811445	+	intergenic:XM_024424421.1/XM_024424422.1/XM_024424423.1-XM_024424425.1/XM_024424424.1
114forw	TGTAGTCATTTAGCAGACACAGG	TGTAGTCATTAAACAAACAGCGG	..........*.*..*...*	4	0.0220406	0.040724	NC_037112.1	13274492	13274514	+	intron:XM_024376495.1
114forw	TGTAGTCATTTAGCAGACACAGG	TTTAGTCATTTAACAGTCAAGGG	.*..........*...*..*	4	0.103916	0.0391608	NC_037098.1	2121303	2121325	-	intron:XM_024440473.1
114forw	TGTAGTCATTTAGCAGACACAGG	TATAGTCATTTAGCAGCTGCGGG	.*..............***.	4	0.0376357	0.0359971	NC_037105.1	21129400	21129422	+	intergenic:XM_024431376.1-XM_024433843.1
114forw	TGTAGTCATTTAGCAGACACAGG	TGTATTAATTGTGCAGACACGGG	....*.*...**........	4	0.254562	0.03	NC_037124.1	9568375	9568397	-	intron:XM_024391179.1
114forw	TGTAGTCATTTAGCAGACACAGG	TGTAATCATTTTGCAGGCTCAGG	....*......*....*.*.	4	0.0896898	0.027451	NC_037122.1	5264631	5264653	-	intergenic:XM_024388702.1/XM_024388701.1/XM_024388700.1/XM_024388699.1/XM_024388697.1/XM_024388696.1-XM_024388703.1
114forw	TGTAGTCATTTAGCAGACACAGG	TTAATTCATTTAGCTGACACAGG	.**.*.........*.....	4	0.397208	0.0272727	NC_037102.1	37304145	37304167	-	exon:XM_024423905.1
114forw	TGTAGTCATTTAGCAGACACAGG	TGGAGTCAGTTAGCGGTCACTGG	..*.....*.....*.*...	4	0.0934373	0.0268254	NC_037127.1	416200	416222	+	exon:XM_024395184.1
114forw	TGTAGTCATTTAGCAGACACAGG	TGTAGGCCTCTAGCTGACACAGG	.....*.*.*....*.....	4	0.213651	0.0261224	NC_037119.1	7911163	7911185	+	intergenic:XM_024385298.1/XM_024385297.1-XM_024385297.1/XM_024385298.1
114forw	TGTAGTCATTTAGCAGACACAGG	TGAAGTCCTTGAGCAGACCCTGG	..*....*..*.......*.	4	0.272931	0.0253343	NC_037111.1	16529746	16529768	-	exon:XM_024373202.1
114forw	TGTAGTCATTTAGCAGACACAGG	TGTAGGCATTGAGAAGACATGGG	.....*....*..*.....*	4	0.0313601	0.024	NC_037116.1	4821651	4821673	-	intron:XM_024381566.1
114forw	TGTAGTCATTTAGCAGACACAGG	TTTAGTCATTTAGCAGTCTAAGG	.*..............*.**	4	0.0845829	0.0228438	NC_037104.1	59931812	59931834	-	intergenic:XM_024430332.1-XM_024430333.1
114forw	TGTAGTCATTTAGCAGACACAGG	TGTAGTGTTTTTGCAGACATAGG	......**...*.......*	4	0.210634	0.0201681	NC_037118.1	13715777	13715799	+	intron:XM_024383649.1
114forw	TGTAGTCATTTAGCAGACACAGG	TGTAGTGTGTTAGCAGAGACAGG	......***........*..	4	0.117024	0.0166467	NW_020128879.1	398930	398952	+	intergenic:XM_024403726.1-XM_024403727.1
114forw	TGTAGTCATTTAGCAGACACAGG	TGGAGTCATTTTGCAGGCTCTGG	..*........*....*.*.	4	0.0931506	0.0158371	NC_037110.1	830129	830151	-	intergenic:XM_024443689.1-XM_024445848.1
114forw	TGTAGTCATTTAGCAGACACAGG	TGGAGTCATTTTGCAGGCTCTGG	..*........*....*.*.	4	0.0931506	0.0158371	NC_037102.1	52295159	52295181	-	intergenic:XM_024424359.1-XM_024424361.1/XM_024424371.1
114forw	TGTAGTCATTTAGCAGACACAGG	TGGAGTCATTTTGCAGGCTCTGG	..*........*....*.*.	4	0.0931506	0.0158371	NC_037100.1	72302819	72302841	+	intergenic:XM_024419404.1-XM_024419217.1/XM_024419216.1
114forw	TGTAGTCATTTAGCAGACACAGG	TATATTCATTTAGCAGAGGCTGG	.*..*............**.	4	0.097755	0.0126923	NC_037107.1	18852732	18852754	-	intron:XM_024438091.1
114forw	TGTAGTCATTTAGCAGACACAGG	CGTAGTCATCTAGCAGGGACTGG	*........*......**..	4	0.11004	0.0107563	NW_020142757.1	50222	50244	-	exon:XM_024416897.1
114forw	TGTAGTCATTTAGCAGACACAGG	CGTAGTCATCTAGCAGGGACTGG	*........*......**..	4	0.11004	0.0107563	NW_020142757.1	50131	50153	-	intron:XM_024416897.1
114forw	TGTAGTCATTTAGCAGACACAGG	TGTAGTGGTGTAGCAGACAGAGG	......**.*.........*	4	0.394296	0.0101499	NC_037100.1	18003726	18003748	+	intergenic:XM_024419299.1-XM_024417179.1
114forw	TGTAGTCATTTAGCAGACACAGG	TGTAGTGGTGTAGCAGACAGAGG	......**.*.........*	4	0.394296	0.0101499	NC_037100.1	13667968	13667990	+	intergenic:XM_024419293.1-XM_024417007.1
114forw	TGTAGTCATTTAGCAGACACAGG	TGTAGTCATTTCGCCAAGACTGG	...........*..**.*..	4	0.00606735	0.00956938	NW_020132525.1	7354	7376	+	intergenic:XM_024410064.1-Gap
114forw	TGTAGTCATTTAGCAGACACAGG	TATATTCATTTAGCAGCGACGGG	.*..*...........**..	4	0.119478	0.00597285	NC_037112.1	3470211	3470233	+	intron:LOC112215312
114forw	TGTAGTCATTTAGCAGACACAGG	TATATTCATTTAGCAGTGACAGG	.*..*...........**..	4	0.119478	0.00451282	NC_037103.1	70192653	70192675	-	intron:XM_024427788.1/XM_024427787.1/XM_024427786.1
114forw	TGTAGTCATTTAGCAGACACAGG	TATATTCATTTAGCAGTGACGGG	.*..*...........**..	4	0.119478	0.00451282	NC_037119.1	7230109	7230131	+	intron:XM_024385295.1
114forw	TGTAGTCATTTAGCAGACACAGG	AGTAGTCATTTAGATGACAGTGG	*............**....*	4	0.0278505	0.00411765	NC_037108.1	26704435	26704457	+	intergenic:XM_024438886.1/XM_024438885.1/XM_024438884.1/XM_024438883.1-XM_024438890.1/XM_024438889.1/XM_024438888.1/XM_024438887.1/XM_024438886.1/XM_024438885.1/XM_024438884.1/XM_024438883.1
114forw	TGTAGTCATTTAGCAGACACAGG	TTTAGACATTTAGGAGATACGGG	.*...*.......*...*..	4	0.027975	0	NC_037129.1	16593268	16593290	-	intergenic:XM_024397447.1-XM_024397448.1
114forw	TGTAGTCATTTAGCAGACACAGG	TGTAGTTATTTAGGAGGCAAGGG	......*......*..*..*	4	0.024559	0	NC_037107.1	8780570	8780592	-	intron:XM_024438066.1
114forw	TGTAGTCATTTAGCAGACACAGG	TGTGGTCATTTAGGAGAAGCAGG	...*.........*...**.	4	0.0145655	0	NC_037112.1	5083056	5083078	-	intergenic:XM_024376469.1-XM_024374280.1
114forw	TGTAGTCATTTAGCAGACACAGG	TGTAGTCATTTGAGAGACAAAGG	...........***.....*	4	0.0161478	0	NC_037097.1	61379327	61379349	+	intergenic:XM_024427332.1-XM_024427350.1
114forw	TGTAGTCATTTAGCAGACACAGG	GGTGTTCATTTAGCACACACAGG	*..**..........*....	4	0.272333	0	NC_037116.1	15167623	15167645	-	intergenic:XM_024381417.1-LOC112220220
114forw	TGTAGTCATTTAGCAGACACAGG	TGTAGTAATATAGGAGACAGTGG	......*..*...*.....*	4	0.0587502	0	NC_037121.1	34548336	34548358	+	intergenic:LOC112223933/LOC112224680-LOC112223933
114forw	TGTAGTCATTTAGCAGACACAGG	TATATTCATTTAGCATACAGTGG	.*..*..........*...*	4	0.119961	0	NC_037098.1	17127189	17127211	-	intron:XM_024445439.1/XM_024445433.1/XM_024445422.1
114forw	TGTAGTCATTTAGCAGACACAGG	CGTAGTCATTGAGGGGACACGGG	*.........*..**.....	4	0.0333135	0	NC_037109.1	39804764	39804786	-	intergenic:XR_002955724.1-XM_024443549.1
114forw	TGTAGTCATTTAGCAGACACAGG	TGTAGTTATTTAGGAGGCAAGGG	......*......*..*..*	4	0.024559	0	NW_020128834.1	6705876	6705898	+	intron:XM_024402410.1
114forw	TGTAGTCATTTAGCAGACACAGG	TTTAGTCATTTAGCACACTACGG	.*.............*..**	4	0.0377877	0	NC_037106.1	56272638	56272660	-	intergenic:XM_024436227.1-XM_024436228.1
114forw	TGTAGTCATTTAGCAGACACAGG	TGTAGTAATATAGGAGACAGTGG	......*..*...*.....*	4	0.0587502	0	NC_037121.1	34564725	34564747	-	intron:XM_024387235.1
114forw	TGTAGTCATTTAGCAGACACAGG	TGTAGTCATTTTGCACATATTGG	...........*...*.*.*	4	0.00944061	0	NC_037100.1	44542512	44542534	+	intergenic:XR_002953276.1-XM_024418203.1
114forw	TGTAGTCATTTAGCAGACACAGG	TTAAGTAATTTAGCAGACACAGG	.**...*.............	3	1.63414	0.340909	NW_020128854.1	171465	171487	-	intron:XM_024403174.1
114forw	TGTAGTCATTTAGCAGACACAGG	AGTAGTCATCTAGCAGACTCTGG	*........*........*.	3	1.03808	0.287179	NC_037100.1	5371574	5371596	+	intron:XM_024419282.1
114forw	TGTAGTCATTTAGCAGACACAGG	TTTAGTCATTTAGCAGACTATGG	.*................**	3	0.470008	0.171329	NC_037111.1	8418655	8418677	-	intergenic:XM_024372957.1/XM_024372956.1-XM_024374044.1
114forw	TGTAGTCATTTAGCAGACACAGG	TGTAGGCATTTAGCAGAAAAAGG	.....*...........*.*	3	0.155806	0.153846	NC_037102.1	33409734	33409756	+	intron:XM_024425442.1
114forw	TGTAGTCATTTAGCAGACACAGG	TGTAGGCATTTAGCAGAAAAAGG	.....*...........*.*	3	0.155806	0.153846	NW_020142510.1	4552327	4552349	-	intron:XM_024413160.1
114forw	TGTAGTCATTTAGCAGACACAGG	TTCAGTCATTTAGCAGACTCCGG	.**...............*.	3	1.04078	0.146853	NC_037106.1	56275055	56275077	-	intergenic:XM_024436227.1-XM_024436228.1
114forw	TGTAGTCATTTAGCAGACACAGG	TTTATTAATTTAGCAGACACTGG	.*..*.*.............	3	1.65734	0.143182	NC_037109.1	60550213	60550235	+	intergenic:XM_024442998.1-XM_024443000.1/XM_024442999.1
114forw	TGTAGTCATTTAGCAGACACAGG	TGTATGTATTTAGCAGACACAGG	....***.............	3	0.958618	0.139286	NW_020128814.1	2959422	2959444	-	intron:XM_024401027.1
114forw	TGTAGTCATTTAGCAGACACAGG	TGTATGTATTTAGCAGACACAGG	....***.............	3	0.958618	0.139286	NC_037107.1	20989193	20989215	-	intron:XM_024437041.1
114forw	TGTAGTCATTTAGCAGACACAGG	TTTTGTCATTTAGCAGACATTGG	.*.*...............*	3	1.49209	0.121488	NC_037100.1	9588663	9588685	-	intron:XM_024415968.1
114forw	TGTAGTCATTTAGCAGACACAGG	TATGGTAATTTAGCAGACACCAG	.*.*..*.............	3	0.331469	0.102831	NC_037122.1	3194873	3194895	+	intergenic:XM_024388644.1/XM_024388643.1-XM_024388649.1/XM_024388647.1/XM_024388650.1
114forw	TGTAGTCATTTAGCAGACACAGG	TTTAGTCATTTAGCAGACTTTGG	.*................**	3	0.470008	0.102797	NC_037104.1	47410728	47410750	-	intergenic:XM_024429865.1-XM_024429873.1
114forw	TGTAGTCATTTAGCAGACACAGG	TTCAGTCATTTAGCAGACATAGG	.**................*	3	1.4712	0.0818182	NC_037106.1	56274327	56274349	-	intergenic:XM_024436227.1-XM_024436228.1
114forw	TGTAGTCATTTAGCAGACACAGG	GTTAGTCATTTAGCAGACAAGAG	**.................*	3	0.298418	0.078905	NC_037102.1	43380338	43380360	+	intergenic:XM_024424101.1-XM_024424104.1/XM_024424103.1/XM_024424102.1
114forw	TGTAGTCATTTAGCAGACACAGG	TTTGGTCATTTAGCAGACAAGAG	.*.*...............*	3	0.298418	0.0515572	NC_037104.1	9360134	9360156	+	intergenic:XM_024428902.1-XM_024428904.1/XM_024428903.1
114forw	TGTAGTCATTTAGCAGACACAGG	TTTAGTCATTTAGCTGACGCTGG	.*............*...*.	3	0.282889	0.0477273	NW_020129260.1	86933	86955	+	intergenic:XM_024406103.1-LOC112237503
114forw	TGTAGTCATTTAGCAGACACAGG	TTAAGTCATTTAGCAGACGCCAG	.**...............*.	3	0.208156	0.0441919	NW_020129550.1	39648	39670	-	intron:XM_024406994.1
114forw	TGTAGTCATTTAGCAGACACAGG	TTTAATCATTTAGCAGACATGAG	.*..*..............*	3	0.298418	0.0428956	NC_037127.1	23087207	23087229	-	intergenic:XM_024395669.1/XM_024395670.1-XM_024395670.1/XM_024395669.1
114forw	TGTAGTCATTTAGCAGACACAGG	TTGAGTCATTTAGCAGACAAGAG	.**................*	3	0.29424	0.0412458	NC_037103.1	49135959	49135981	+	intron:XM_024428287.1
114forw	TGTAGTCATTTAGCAGACACAGG	TTCAGTCATTTAGCAGACTCTAG	.**...............*.	3	0.208156	0.038073	NC_037104.1	71270740	71270762	-	intron:XM_024428661.1
114forw	TGTAGTCATTTAGCAGACACAGG	CTTAGTCATTTAGCAGACAGTGG	**.................*	3	1.49209	0.0320856	NC_037105.1	24195866	24195888	+	intron:XM_024431476.1/XM_024431475.1
114forw	TGTAGTCATTTAGCAGACACAGG	TTTAATAATTTAGCAGACACTGA	.*..*.*.............	3	0.331469	0.0287247	NC_037105.1	6041709	6041731	-	intron:XM_024430857.1
114forw	TGTAGTCATTTAGCAGACACAGG	CGAGGTCATTTAGCAGACACTGA	*.**................	3	0.457485	0.0265731	NW_020129025.1	214530	214552	+	intergenic:XR_002951226.1/XR_002951225.1/XR_002951224.1-XR_002951226.1
114forw	TGTAGTCATTTAGCAGACACAGG	TTAACTCATTTAGCAGACACAGA	.**.*...............	3	0.457485	0.0248016	NC_037099.1	60817240	60817262	+	intron:XR_002951773.1/XM_024407695.1
114forw	TGTAGTCATTTAGCAGACACAGG	ATTAGTCATTTAGCAGACTCTGA	**................*.	3	0.225424	0.0237956	NC_037109.1	56999198	56999220	+	exon:XM_024442834.1/XM_024442835.1
114forw	TGTAGTCATTTAGCAGACACAGG	TTTGGTAATTTAGCAGACACTGA	.*.*..*.............	3	0.331469	0.020715	NW_020128804.1	5634930	5634952	+	intron:LOC112232150
114forw	TGTAGTCATTTAGCAGACACAGG	TTTGGTAATTTAGCAGACACTGA	.*.*..*.............	3	0.331469	0.020715	NC_037108.1	51885781	51885803	-	intron:LOC112264165
114forw	TGTAGTCATTTAGCAGACACAGG	TTGAGTTATTTAGCAGACACTGA	.**...*.............	3	0.326828	0.017953	NW_020128804.1	15164533	15164555	+	intron:XM_024399514.1/XM_024399513.1/XM_024399512.1
114forw	TGTAGTCATTTAGCAGACACAGG	TTGAGTTATTTAGCAGACACTGA	.**...*.............	3	0.326828	0.017953	NW_020128804.1	8728085	8728107	-	intron:XM_024399300.1
114forw	TGTAGTCATTTAGCAGACACAGG	TGAGGTCATTTAGCAGACTCTGA	..**..............*.	3	0.208156	0.0166934	NW_020128950.1	307379	307401	+	intergenic:LOC112235887-XM_024404437.1
114forw	TGTAGTCATTTAGCAGACACAGG	TAGAGTCATTTAGCAGACTCTGA	.**...............*.	3	0.208156	0.0158202	NW_020130069.1	4992	5014	+	intergenic:Gap-XM_024407999.1
114forw	TGTAGTCATTTAGCAGACACAGG	TTCAGTCATTTAGCAGACCCCAG	.**...............*.	3	0.208156	0.014629	NW_020129413.1	85866	85888	+	intergenic:XM_024406661.1-XR_002951541.1
114forw	TGTAGTCATTTAGCAGACACAGG	TTAATTCATTTAGCAGACACAGA	.**.*...............	3	0.457485	0.0094697	NC_037108.1	5292218	5292240	+	intergenic:rna29713-XM_024440540.1
114forw	TGTAGTCATTTAGCAGACACAGG	TGTTTTCATTCAGCAGACACAGA	...**.....*.........	3	0.282329	0.00883838	NC_037106.1	49281788	49281810	+	intergenic:XM_024435912.1-XM_024435915.1/XM_024435914.1/XM_024435913.1
114forw	TGTAGTCATTTAGCAGACACAGG	CGTTGTCATTTAGCAGACAGTAG	*..*...............*	3	0.298418	0.00831848	NC_037109.1	32695001	32695023	-	intergenic:XM_024441897.1-XM_024441898.1
114forw	TGTAGTCATTTAGCAGACACAGG	TTGAGTCATTTAGCAGACGCAGA	.**...............*.	3	0.208156	0.00828598	NC_037120.1	3680950	3680972	-	intergenic:XM_024386372.1/XM_024386371.1/XM_024386370.1-XR_002949302.1/XM_024386374.1/XR_002949303.1/XM_024386375.1
114forw	TGTAGTCATTTAGCAGACACAGG	TTGAGTCATTTAGCAGACAGAAG	.**................*	3	0.29424	0.00485245	NC_037125.1	10562371	10562393	+	intergenic:XM_024392338.1-XM_024392542.1/XM_024392541.1/XM_024392540.1/XM_024392539.1
114forw	TGTAGTCATTTAGCAGACACAGG	TTGAGTCATTTAGCAGACAGGAG	.**................*	3	0.29424	0.00485245	NC_037120.1	20403496	20403518	-	intron:XM_024387045.1
114forw	TGTAGTCATTTAGCAGACACAGG	TTTTGTCATTTAGCAGACAGTGA	.*.*...............*	3	0.298418	0.00165424	NC_037108.1	43558737	43558759	-	intergenic:XM_024439554.1-XR_002955488.1
114forw	TGTAGTCATTTAGCAGACACAGG	TGTAGTGATTGAGGAGACACAGG	......*...*..*......	3	0.143659	0	NC_037100.1	21890754	21890776	+	intergenic:XM_024419312.1-XM_024417323.1
114forw	TGTAGTCATTTAGCAGACACAGG	TGAAGTCCTTTAGCACACACTGG	..*....*.......*....	3	0.504264	0	NC_037104.1	23914569	23914591	+	exon:XM_024429423.1/XM_024429422.1/XM_024429421.1/XM_024429420.1
114forw	TGTAGTCATTTAGCAGACACAGG	TTTAGTCAATTAGCAGACACTGG	.*......*...........	2	4.33172	0.590909	NC_037103.1	48576974	48576996	+	intron:XM_024427016.1
114forw	TGTAGTCATTTAGCAGACACAGG	TTTAGTAATTTAGCAGACACTGG	.*....*.............	2	4.32567	0.477273	NC_037102.1	42470143	42470165	-	intergenic:XM_024424094.1-XM_024424095.1
114forw	TGTAGTCATTTAGCAGACACAGG	TTTAGTCATTTAGCAGACATGGG	.*.................*	2	8.61196	0.190909	NC_037101.1	66643132	66643154	+	intergenic:XR_002953611.1/XR_002953610.1/XM_024421746.1/XM_024421747.1/XM_024421745.1-XR_002953611.1/XR_002953610.1/XM_024421747.1/XM_024421746.1/XM_024421745.1
114forw	TGTAGTCATTTAGCAGACACAGG	TATTGTCATTTAGCAGACACTAG	.*.*................	2	1.09195	0.139601	NC_037104.1	35708912	35708934	-	intergenic:XM_024429660.1/XM_024429659.1-XM_024430676.1/XM_024428570.1
114forw	TGTAGTCATTTAGCAGACACAGG	TGCATTCATTTAGCAGACACTGG	..*.*...............	2	5.38333	0.128571	NC_037128.1	4291185	4291207	-	intron:XM_024396483.1
114forw	TGTAGTCATTTAGCAGACACAGG	TGTTGTCATTTAGCAGACTCCAG	...*..............*.	2	0.855	0.0888371	NC_037109.1	33133535	33133557	-	intergenic:XM_024441906.1-XM_024441911.1
114forw	TGTAGTCATTTAGCAGACACAGG	TGTGGTCATTTAGCAGACTCTAG	...*..............*.	2	0.855	0.0872507	NC_037104.1	71270656	71270678	-	intron:XM_024428661.1
114forw	TGTAGTCATTTAGCAGACACAGG	TTGAGTCATTTAGCAGACACTAG	.**.................	2	1.02934	0.0824916	NC_037114.1	14024080	14024102	-	intron:XM_024377909.1
114forw	TGTAGTCATTTAGCAGACACAGG	TTTAGTCATTTAGCAGACGCAAG	.*................*.	2	1.10833	0.0618687	NC_037104.1	48593510	48593532	+	intron:XM_024429892.1
114forw	TGTAGTCATTTAGCAGACACAGG	TGCAGTCATTTAGCAGACTCTAG	..*...............*.	2	0.951808	0.0598291	NC_037104.1	71270836	71270858	-	intron:XM_024428661.1
114forw	TGTAGTCATTTAGCAGACACAGG	TGTAGATATTTAGCAGACACTGA	.....**.............	2	0.431378	0.0489005	NC_037104.1	23480278	23480300	+	intron:XM_024429400.1/XM_024429399.1/XM_024429398.1/XM_024429397.1/XM_024429396.1/XM_024429395.1/XM_024429394.1
114forw	TGTAGTCATTTAGCAGACACAGG	TTTAGTCATTTAGCAAACACAGA	.*.............*....	2	0.418974	0.0441919	NC_037102.1	72051217	72051239	+	intron:XM_024425137.1/XM_024425136.1/XM_024425135.1/XM_024425134.1/XM_024425133.1/XM_024425132.1/XM_024425131.1/XM_024425130.1/XM_024425129.1/XM_024425127.1
114forw	TGTAGTCATTTAGCAGACACAGG	AGTAGTCATTTAGCAGACTCTGA	*.................*.	2	1.30109	0.0373932	NW_020129026.1	73151	73173	-	intron:LOC112236401
114forw	TGTAGTCATTTAGCAGACACAGG	TTTAGTTATTTAGCAGACACTGA	.*....*.............	2	0.865133	0.0359059	NC_037097.1	44433619	44433641	+	intron:XR_002953685.1/XM_024422537.1
114forw	TGTAGTCATTTAGCAGACACAGG	TTTAGTAATTTAGCAGACACAGA	.*....*.............	2	0.865133	0.0331439	NC_037101.1	19794239	19794261	+	intron:XM_024420108.1
114forw	TGTAGTCATTTAGCAGACACAGG	TTTAGTAATTTAGCAGACACTGA	.*....*.............	2	0.865133	0.0331439	NW_020131110.1	18888	18910	-	intron:XM_024409252.1
114forw	TGTAGTCATTTAGCAGACACAGG	TTTAGTCATTTAGCAGATACTGA	.*...............*..	2	0.600645	0.0284091	NW_020142553.1	1606160	1606182	+	intron:XM_024415494.1
114forw	TGTAGTCATTTAGCAGACACAGG	TTTAGTCATTTAGCAGATACTGA	.*...............*..	2	0.600645	0.0284091	NC_037126.1	22933546	22933568	+	intron:XM_024394020.1
114forw	TGTAGTCATTTAGCAGACACAGG	TTTAGTCATTTAGCAGATACTGA	.*...............*..	2	0.600645	0.0284091	NW_020142553.1	1618242	1618264	-	intron:XM_024415494.1
114forw	TGTAGTCATTTAGCAGACACAGG	TTTAGTCATTTAGCAGATACTGA	.*...............*..	2	0.600645	0.0284091	NC_037126.1	22945628	22945650	-	intron:XM_024394020.1
114forw	TGTAGTCATTTAGCAGACACAGG	TTTGGTCATTTAGCAGACACTGA	.*.*................	2	1.09195	0.0276199	NC_037122.1	24175084	24175106	-	intergenic:XM_024389351.1/XM_024389352.1/XM_024389349.1/XM_024389350.1-XM_024389350.1/XM_024389349.1/XM_024389351.1/XM_024389352.1
114forw	TGTAGTCATTTAGCAGACACAGG	TGGAGTAATTTAGCAGACACTGA	..*...*.............	2	0.809831	0.0260417	NC_037098.1	14124735	14124757	+	intergenic:XM_024444857.1-XM_024444889.1
114forw	TGTAGTCATTTAGCAGACACAGG	TTTAGTCATTTAGCAGACAAGGA	.*.................*	2	1.72239	0.022096	NC_037125.1	30723524	30723546	+	intergenic:XM_024393152.1-XM_024393153.1
114forw	TGTAGTCATTTAGCAGACACAGG	TTCAGTCATTTAGCAGACACTGA	.**.................	2	1.02934	0.0189394	NW_020128813.1	4392523	4392545	-	intergenic:XR_002950741.1/XM_024400726.1-XR_002950741.1
114forw	TGTAGTCATTTAGCAGACACAGG	TTCAGTCATTTAGCAGACACTGA	.**.................	2	1.02934	0.0189394	NC_037127.1	28907421	28907443	+	intron:XM_024395169.1
114forw	TGTAGTCATTTAGCAGACACAGG	TGTAGTTATTTAGCAGGCACTGA	......*.........*...	2	0.454195	0.00995711	NC_037117.1	14218211	14218233	+	intron:XM_024383009.1/XM_024383008.1/XM_024383007.1
114forw	TGTAGTCATTTAGCAGACACAGG	TTTAGTCATTTAGCAGACAGTAG	.*.................*	2	1.72239	0.00970489	NC_037097.1	47211520	47211542	-	intergenic:XR_002953829.1/XR_002953828.1-XM_024423415.1
114forw	TGTAGTCATTTAGCAGACACAGG	TTTAGTCATTTAGCAGACACTGG	.*..................	1	100	0.636364	NC_037120.1	9485486	9485508	-	intergenic:XM_024386516.1-LOC112223484
114forw	TGTAGTCATTTAGCAGACACAGG	TTTAGTCATTTAGCAGACACTAG	.*..................	1	20	0.164983	NC_037106.1	56273196	56273218	-	intergenic:XM_024436227.1-XM_024436228.1
114forw	TGTAGTCATTTAGCAGACACAGG	TTTAGTCATTTAGCAGACACTGA	.*..................	1	20	0.0441919	NC_037129.1	26362437	26362459	+	intergenic:LOC112230644-XM_024397786.1/XM_024397785.1/XM_024397784.1
114forw	TGTAGTCATTTAGCAGACACAGG	TTTAGTCATTTAGCAGACACCGA	.*..................	1	20	0.0441919	NC_037105.1	75372664	75372686	+	intergenic:XM_024433002.1-XM_024433003.1
115forw	GTAGTCATTTAGCAGACACAGGG	TTAGCCAATCAGCAGACACAAGG	*...*..*.*..........	4	1.3177	0.426667	NC_037107.1	20921142	20921164	-	intergenic:XM_024437038.1/XM_024437039.1-XM_024437040.1
115forw	GTAGTCATTTAGCAGACACAGGG	TTAGCCAATCAGCAGACACAAGG	*...*..*.*..........	4	1.3177	0.426667	NW_020128814.1	2891371	2891393	-	intergenic:XM_024401023.1/XM_024401024.1-XM_024401026.1
115forw	GTAGTCATTTAGCAGACACAGGG	ATAGTCATATAACAGACTCAAGG	*.......*..*.....*..	4	0.0932899	0.39	NC_037107.1	18432610	18432632	+	intron:XM_024436994.1
115forw	GTAGTCATTTAGCAGACACAGGG	TCAGTCAGTTAGCAGACACTCGG	**.....*...........*	4	0.697447	0.377143	NC_037106.1	56274390	56274412	-	intergenic:XM_024436227.1-XM_024436228.1
115forw	GTAGTCATTTAGCAGACACAGGG	TGAGTCATTTAGCAGACTCGCGG	**...............*.*	4	0.1367	0.321176	NW_020129341.1	121989	122011	-	intergenic:XM_024406410.1-Gap
115forw	GTAGTCATTTAGCAGACACAGGG	TCAGTCACTTTGCAGACACATGG	**.....*..*.........	4	0.794051	0.263736	NC_037101.1	10389461	10389483	-	intergenic:XM_024419823.1-XM_024419824.1
115forw	GTAGTCATTTAGCAGACACAGGG	GTAATCATATAGTAGACAAATGG	...*....*...*.....*.	4	0.117933	0.250714	NW_020142513.1	448654	448676	+	intergenic:XM_024414058.1/XM_024414059.1-XM_024414059.1/XM_024414058.1
115forw	GTAGTCATTTAGCAGACACAGGG	GTAATCATATAGTAGACAAATGG	...*....*...*.....*.	4	0.117933	0.250714	NC_037099.1	7790013	7790035	-	intron:XR_002949884.1
115forw	GTAGTCATTTAGCAGACACAGGG	GTAATCATATAGTAGACAAATGG	...*....*...*.....*.	4	0.117933	0.250714	NC_037108.1	35136010	35136032	-	intron:XR_002955464.1
115forw	GTAGTCATTTAGCAGACACAGGG	GGAGTCAATAAGAAGACACAAGG	.*.....*.*..*.......	4	0.509948	0.221538	NW_020128806.1	128056	128078	+	intergenic:id771944-id771950
115forw	GTAGTCATTTAGCAGACACAGGG	GGAGTGATTTAGCTAACACACGG	.*...*.......**.....	4	0.0363147	0.210824	NC_037104.1	13173467	13173489	-	intergenic:XM_024430618.1-XM_024430619.1
115forw	GTAGTCATTTAGCAGACACAGGG	GTAATCATGTCACAGACACAGGG	...*....*.**........	4	0.227727	0.208	NC_037121.1	24602787	24602809	+	intron:XM_024388111.1
115forw	GTAGTCATTTAGCAGACACAGGG	TTATTAATTTAGCAGACACTGGG	*..*.*.............*	4	0.421956	0.202597	NC_037109.1	60550214	60550236	+	intergenic:XM_024442998.1-XM_024443000.1/XM_024442999.1
115forw	GTAGTCATTTAGCAGACACAGGG	GTGGGCATACAGCAGACACATGG	..*.*...**..........	4	0.757342	0.193693	NC_037097.1	50526752	50526774	-	intergenic:XM_024424579.1/XM_024424569.1/XM_024424560.1-XM_024424596.1/XM_024424589.1
115forw	GTAGTCATTTAGCAGACACAGGG	GATGTCATTTAGCAGACTCTCGG	.**..............*.*	4	0.134786	0.179186	NW_020129341.1	120146	120168	+	intergenic:XM_024406410.1-Gap
115forw	GTAGTCATTTAGCAGACACAGGG	GTTGTCAGTTAGTAGAAACACGG	..*....*....*...*...	4	0.220829	0.169098	NC_037119.1	1810574	1810596	+	intergenic:XM_024385334.1-XM_024385433.1
115forw	GTAGTCATTTAGCAGACACAGGG	GGTGACATTTAGCTGACACAGGG	.**.*........*......	4	0.220836	0.158118	NW_020129248.1	117223	117245	+	intergenic:XM_024406044.1-XM_024406045.1
115forw	GTAGTCATTTAGCAGACACAGGG	GTACTCATATGGCAGACATATGG	...*....*.*.......*.	4	0.169129	0.147479	NW_020142498.1	1538493	1538515	-	intergenic:rna77543-XM_024412558.1/XM_024412557.1
115forw	GTAGTCATTTAGCAGACACAGGG	GTGATCATTGAGCTGACACAGGG	..**.....*...*......	4	0.193588	0.146667	NC_037110.1	43822116	43822138	+	intron:XM_024445699.1
115forw	GTAGTCATTTAGCAGACACAGGG	GCAGTCATTTAGAAAAAACAAGG	.*..........*.*.*...	4	0.0632235	0.144796	NC_037103.1	19606743	19606765	-	intergenic:XM_024428234.1-XM_024426145.1/XM_024426146.1
115forw	GTAGTCATTTAGCAGACACAGGG	GTAGTCAATTCACGGACACAGGG	.......*..**.*......	4	0.055534	0.139378	NC_037101.1	34162814	34162836	-	intergenic:LOC112251506-XM_024420566.1
115forw	GTAGTCATTTAGCAGACACAGGG	GTAGTAATTGATTAGACACAGGG	.....*...*.**.......	4	0.144812	0.125	NC_037119.1	9960367	9960389	+	intergenic:XM_024385785.1-XM_024385302.1
115forw	GTAGTCATTTAGCAGACACAGGG	ATACTCATTTAACACACACACGG	*..*.......*..*.....	4	0.198201	0.121283	NW_020128811.1	85634	85656	-	intron:XM_024400292.1/XM_024400291.1/XM_024400290.1/XM_024400289.1
115forw	GTAGTCATTTAGCAGACACAGGG	ATACTCATTTAACACACACACGG	*..*.......*..*.....	4	0.198201	0.121283	NC_037125.1	10616265	10616287	+	intron:XM_024392542.1/XM_024392541.1/XM_024392540.1/XM_024392539.1
115forw	GTAGTCATTTAGCAGACACAGGG	ATACTCATTTAACACACACACGG	*..*.......*..*.....	4	0.198201	0.121283	NC_037101.1	25825386	25825408	-	intron:XM_024420345.1/XM_024420344.1/XM_024420342.1/XM_024420341.1
115forw	GTAGTCATTTAGCAGACACAGGG	ATAGTGATTTACCAGATACAGGG	*....*.....*....*...	4	0.181449	0.111176	NW_020142581.1	1388402	1388424	-	intergenic:XM_024415854.1-XM_024415850.1/XM_024415855.1/XM_024415851.1/XM_024415852.1
115forw	GTAGTCATTTAGCAGACACAGGG	ATAGTGATTTACCAGATACAGGG	*....*.....*....*...	4	0.181449	0.111176	NC_037118.1	15719996	15720018	+	intergenic:XM_024384329.1/XM_024384324.1/XM_024384326.1/XM_024384325.1-XM_024384328.1
115forw	GTAGTCATTTAGCAGACACAGGG	GTAGTGTTTCAGCAAACACACGG	.....**..*....*.....	4	0.145924	0.109804	NW_020142535.1	111895	111917	+	intergenic:XM_024414650.1-XM_024414651.1
115forw	GTAGTCATTTAGCAGACACAGGG	TTAGTCATTTAGCAGAATTAGGG	*...............***.	4	0.039756	0.107692	NC_037111.1	3548119	3548141	-	intron:XM_024374029.1
115forw	GTAGTCATTTAGCAGACACAGGG	GTAAACATGTATCAGACACAGGG	...**...*..*........	4	0.410318	0.107143	NC_037124.1	30141644	30141666	-	intergenic:XM_024391914.1/XM_024391913.1/XM_024391912.1-XM_024391919.1/XM_024391917.1
115forw	GTAGTCATTTAGCAGACACAGGG	CTAGTCATTGTGCAAACACACGG	*........**...*.....	4	0.205918	0.103426	NW_020131881.1	8997	9019	+	intergenic:Gap-LOC112241763
115forw	GTAGTCATTTAGCAGACACAGGG	GTAGTCATCTTGCAGACATGAGG	........*.*.......**	4	0.0637289	0.100244	NC_037101.1	84965419	84965441	+	intergenic:XM_024422324.1-XM_024422325.1
115forw	GTAGTCATTTAGCAGACACAGGG	GTCCTCACTTAGCAGACAAAGGG	..**...*..........*.	4	0.491768	0.0972389	NC_037104.1	4609541	4609563	-	intergenic:LOC112257006-LOC112255890
115forw	GTAGTCATTTAGCAGACACAGGG	GTACTCATTTCACAGAAACATGG	...*......**....*...	4	0.158025	0.0922353	NW_020130045.1	26914	26936	-	intergenic:Gap-XM_024407970.1
115forw	GTAGTCATTTAGCAGACACAGGG	GTAGTCATTTAGTAGACTATAGG	............*....***	4	0.0135997	0.09	NW_020128833.1	991000	991022	+	intergenic:XM_024402373.1-Gap
115forw	GTAGTCATTTAGCAGACACAGGG	GTAGTAATGCAGCACACACAGGG	.....*..**....*.....	4	0.130541	0.0836116	NC_037105.1	38017760	38017782	-	intergenic:XM_024431990.1/XM_024431993.1/XM_024431992.1/XM_024431991.1-XM_024431993.1/XM_024431992.1/XM_024431990.1
115forw	GTAGTCATTTAGCAGACACAGGG	GTAGCTATGTAGCATACACAAGG	....**..*.....*.....	4	0.141738	0.0821186	NC_037110.1	6561865	6561887	+	intergenic:LOC112267715-XM_024443958.1
115forw	GTAGTCATTTAGCAGACACAGGG	GTAGCTATGTAGCATACACAAGG	....**..*.....*.....	4	0.141738	0.0821186	NC_037103.1	5918319	5918341	-	intergenic:XM_024425705.1/XM_024425704.1-XM_024425707.1
115forw	GTAGTCATTTAGCAGACACAGGG	TAAGTCATTTAGCAGACAGGTGG	**................**	4	0.219696	0.0808824	NC_037112.1	37475741	37475763	+	intergenic:XM_024375181.1-XM_024375182.1/XM_024375181.1
115forw	GTAGTCATTTAGCAGACACAGGG	GTAGTCTGTGAGCAGACTCATGG	......**.*.......*..	4	0.176397	0.0802083	NW_020129777.1	278320	278342	+	intergenic:XM_024407485.1-XM_024407481.1
115forw	GTAGTCATTTAGCAGACACAGGG	GTAGTCCGTGAGCAGACTCAGGG	......**.*.......*..	4	0.176397	0.0802083	NW_020129777.1	278657	278679	+	intergenic:XM_024407485.1-XM_024407481.1
115forw	GTAGTCATTTAGCAGACACAGGG	TAAGTCATTTAGCAGACGCCAGG	**...............*.*	4	0.1367	0.0769231	NW_020129550.1	39647	39669	-	intron:XM_024406994.1
115forw	GTAGTCATTTAGCAGACACAGGG	GTAGGCATGGAGAAGACACATGG	....*...**..*.......	4	0.297253	0.0761905	NC_037116.1	17489079	17489101	-	intergenic:XM_024382015.1/XM_024382014.1/XM_024382013.1-XM_024382015.1/XM_024382013.1
115forw	GTAGTCATTTAGCAGACACAGGG	GCAGGCACTCAGCAGACACAGAG	.*..*..*.*..........	4	0.251422	0.0758519	NC_037108.1	70361249	70361271	-	intergenic:XM_024440379.1/XM_024440378.1/XM_024440376.1/XM_024440380.1/XM_024440377.1/XM_024440381.1-XM_024440383.1/XM_024440382.1
115forw	GTAGTCATTTAGCAGACACAGGG	GCAGTCCTTTAGCCAACACATGG	.*....*......**.....	4	0.0409966	0.0756303	NW_020142741.1	14041	14063	+	intergenic:XM_024416847.1-XM_024416849.1
115forw	GTAGTCATTTAGCAGACACAGGG	GTGGCCATTTTGCAGACGCAAGG	..*.*.....*......*..	4	0.169824	0.0752137	NC_037109.1	20403081	20403103	-	intron:XM_024441388.1/XM_024441387.1/XM_024441386.1
115forw	GTAGTCATTTAGCAGACACAGGG	ATATTCAGTTTGCAGACACATGG	*..*...*..*.........	4	0.794051	0.0738462	NC_037098.1	18497213	18497235	-	intergenic:XM_024385374.1-XM_024445752.1
115forw	GTAGTCATTTAGCAGACACAGGG	GCAGTGATTTTCCAGACACAAGG	.*...*....**........	4	0.236357	0.0698125	NC_037100.1	60858609	60858631	-	intergenic:XM_024418743.1-XM_024418747.1/XM_024418748.1
115forw	GTAGTCATTTAGCAGACACAGGG	GTAGTCATTAAGGAAACACTTGG	.........*..*.*....*	4	0.0569898	0.0660046	NC_037105.1	65420353	65420375	-	intergenic:XM_024432611.1-XM_024432614.1
115forw	GTAGTCATTTAGCAGACACAGGG	GGTGTCAATCAGCAGACACAGAG	.**....*.*..........	4	0.247902	0.0655895	NC_037104.1	38135636	38135658	+	intergenic:XM_024429697.1-XM_024429698.1
115forw	GTAGTCATTTAGCAGACACAGGG	ATATACATTTATCAGACACATGG	*..**......*........	4	0.703916	0.0629371	NC_037100.1	53976899	53976921	+	intergenic:XM_024418451.1/XM_024418450.1/XM_024418447.1/XM_024418446.1-XM_024418452.1/XM_024418451.1/XM_024418450.1/XM_024418448.1/XM_024418447.1/XM_024418446.1
115forw	GTAGTCATTTAGCAGACACAGGG	GTGGTCATTTAGCCAACATAAGG	..*..........**...*.	4	0.0196373	0.0568843	NC_037109.1	47340397	47340419	-	intron:XM_024442477.1
115forw	GTAGTCATTTAGCAGACACAGGG	GTAGCCATTTCACATACACAAGG	....*.....**..*.....	4	0.1047	0.0533333	NC_037122.1	2290094	2290116	-	intergenic:XM_024388638.1-XR_002949530.1
115forw	GTAGTCATTTAGCAGACACAGGG	TTAGTCATTTAGCAGGCATTTGG	*..............*..**	4	0.0377877	0.0532544	NC_037106.1	44732788	44732810	-	intron:LOC112260554
115forw	GTAGTCATTTAGCAGACACAGGG	CTAGTAATGTAGCAGACAGAAGG	*....*..*.........*.	4	0.194752	0.0513241	NC_037112.1	57680081	57680103	-	exon:XR_002948281.1/XR_002948280.1/XR_002948279.1/XM_024376015.1
115forw	GTAGTCATTTAGCAGACACAGGG	GCAGTCAGGTAGCAGACAGATGG	.*.....**.........*.	4	0.304736	0.0486395	NC_037114.1	38626148	38626170	-	intergenic:XM_024378628.1-XM_024378584.1
115forw	GTAGTCATTTAGCAGACACAGGG	GGAATCATTTAGGAGACAAAGGG	.*.*........*.....*.	4	0.193016	0.0441818	NC_037112.1	47493150	47493172	-	intron:XM_024375577.1/XM_024375576.1/XM_024375575.1/XM_024375573.1/XM_024375572.1/XM_024375571.1/XM_024375570.1/XM_024375569.1/XM_024375568.1/XM_024375567.1
115forw	GTAGTCATTTAGCAGACACAGGG	GGAGTCAGTTAGCATATACAGGG	.*.....*......*.*...	4	0.163368	0.0410667	NW_020129435.1	52990	53012	-	intergenic:XM_024406699.1-XM_024406700.1
115forw	GTAGTCATTTAGCAGACACAGGG	TTAGTCTTTTAGCAGGAACACGG	*.....*........**...	4	0.0716114	0.0392628	NC_037100.1	71220949	71220971	-	exon:XM_024419196.1/XM_024419197.1
115forw	GTAGTCATTTAGCAGACACAGGG	GTAGTCATTTGGTAGGCAAAGGG	..........*.*..*..*.	4	0.0158839	0.0375	NW_020142575.1	499777	499799	+	intergenic:XM_024415754.1/XM_024415753.1/XM_024415752.1/XM_024415751.1/XM_024415750.1/XM_024415749.1-XM_024415756.1
115forw	GTAGTCATTTAGCAGACACAGGG	GTAGTCATTTGGTAGGCAAAGGG	..........*.*..*..*.	4	0.0158839	0.0375	NW_020128841.1	264608	264630	-	intergenic:XM_024402952.1-XM_024402933.1/XM_024402932.1/XM_024402931.1/XM_024402929.1/XM_024402928.1/XM_024402927.1
115forw	GTAGTCATTTAGCAGACACAGGG	GTAGACAGTTAGCCGATACAAGG	....*..*.....*..*...	4	0.086229	0.0366667	NW_020130740.1	34908	34930	-	intron:XM_024408908.1
115forw	GTAGTCATTTAGCAGACACAGGG	GTAGACAGTTAGCCGATACAAGG	....*..*.....*..*...	4	0.086229	0.0366667	NW_020130740.1	36647	36669	-	intron:XM_024408908.1
115forw	GTAGTCATTTAGCAGACACAGGG	GCATTCATTTAACAGACAGAAGG	.*.*.......*......*.	4	0.245385	0.0363636	NC_037100.1	3022759	3022781	-	intergenic:XM_024419278.1-XM_024415067.1
115forw	GTAGTCATTTAGCAGACACAGGG	CTAGTGAGTTAGGAGACACATGG	*....*.*....*.......	4	0.351943	0.0357143	NC_037127.1	31255944	31255966	+	intron:XM_024396070.1/XM_024396069.1
115forw	GTAGTCATTTAGCAGACACAGGG	GTAGTCAGTAAGAATACACATGG	.......*.*..*.*.....	4	0.130383	0.0345369	NC_037112.1	40654546	40654568	-	intron:XM_024375300.1/XM_024375299.1
115forw	GTAGTCATTTAGCAGACACAGGG	GTAGTCAGTAAGAATACACATGG	.......*.*..*.*.....	4	0.130383	0.0345369	NW_020128812.1	2962636	2962658	+	intron:XM_024400495.1/XM_024400493.1
115forw	GTAGTCATTTAGCAGACACAGGG	GTAGTGGTGTAGCAGACAGAGGG	.....**.*.........*.	4	0.119546	0.0273109	NC_037100.1	13667969	13667991	+	intergenic:XM_024419293.1-XM_024417007.1
115forw	GTAGTCATTTAGCAGACACAGGG	GTAGTGGTGTAGCAGACAGAGGG	.....**.*.........*.	4	0.119546	0.0273109	NC_037100.1	18003727	18003749	+	intergenic:XM_024419299.1-XM_024417179.1
115forw	GTAGTCATTTAGCAGACACAGGG	GCCGACATTTAGCATACACACGG	.**.*.........*.....	4	0.397208	0.0262391	NC_037101.1	52794748	52794770	-	intergenic:XM_024421120.1/XM_024421118.1-XM_024421120.1/XM_024421119.1/XM_024421118.1
115forw	GTAGTCATTTAGCAGACACAGGG	GTAGTATTTTAGCCCACACAAGG	.....**......**.....	4	0.0236076	0.0237419	NC_037116.1	15351357	15351379	+	intergenic:XM_024381417.1-LOC112220220
115forw	GTAGTCATTTAGCAGACACAGGG	GTAGTCATTTTTAGGACACATGG	..........****......	4	0.020547	0.0212411	NC_037098.1	17139320	17139342	+	intergenic:XM_024445433.1/XM_024445422.1-XM_024445470.1/XM_024445462.1/XM_024445459.1/XM_024445451.1
115forw	GTAGTCATTTAGCAGACACAGGG	TTAGTCATTTAGGTCACACATGG	*...........***.....	4	0.0232294	0.0198347	NC_037097.1	53237649	53237671	-	intergenic:LOC112253179-XR_002955207.1
115forw	GTAGTCATTTAGCAGACACAGGG	TTAGTCATTTAGGTCACACATGG	*...........***.....	4	0.0232294	0.0198347	NC_037110.1	40529179	40529201	-	intron:XM_024445345.1/XM_024445344.1/XM_024445346.1
115forw	GTAGTCATTTAGCAGACACAGGG	TTAGTCATTTAGGTCACACATGG	*...........***.....	4	0.0232294	0.0198347	NC_037112.1	14499252	14499274	+	intron:XM_024374602.1
115forw	GTAGTCATTTAGCAGACACAGGG	TTAGTCATTTAGGTCACACATGG	*...........***.....	4	0.0232294	0.0198347	NC_037104.1	15250321	15250343	+	intergenic:XM_024430623.1-LOC112257040
115forw	GTAGTCATTTAGCAGACACAGGG	GTAGTAATTAAGCAGGCAGAAGG	.....*...*.....*..*.	4	0.0453796	0.0191327	NC_037101.1	42003941	42003963	-	intergenic:XM_024422506.1-LOC112251520
115forw	GTAGTCATTTAGCAGACACAGGG	CTAGTCATTTAGGAGAAGCATGG	*...........*...**..	4	0.0462381	0.0181818	NC_037129.1	1612754	1612776	+	intergenic:XM_024397024.1/XM_024397025.1/XM_024397026.1-rna61431
115forw	GTAGTCATTTAGCAGACACAGGG	GTGCTCCTTTAGCAGACAGATGG	..**..*...........*.	4	0.335877	0.017693	NC_037108.1	36283852	36283874	-	exon:LOC112264134
115forw	GTAGTCATTTAGCAGACACAGGG	GTACTGATTGAGCAGACAGATGG	...*.*...*........*.	4	0.277906	0.0165441	NC_037121.1	8112213	8112235	-	intergenic:XM_024387528.1/XM_024387527.1-XM_024387530.1
115forw	GTAGTCATTTAGCAGACACAGGG	ATAGTCATTTAGCGGAGACTTGG	*............*..*..*	4	0.0400091	0.0148235	NC_037103.1	14059537	14059559	+	intergenic:LOC112255169-LOC112255170
115forw	GTAGTCATTTAGCAGACACAGGG	ATAGTCATTTAGCGGAGACTTGG	*............*..*..*	4	0.0400091	0.0148235	NC_037110.1	13705415	13705437	-	intergenic:LOC112267739-LOC112267740
115forw	GTAGTCATTTAGCAGACACAGGG	GTAATCATTCAGCGGAGACATGG	...*.....*...*..*...	4	0.0794169	0.0131765	NW_020142606.1	957295	957317	+	intergenic:XM_024416150.1-Gap
115forw	GTAGTCATTTAGCAGACACAGGG	GTAATCATTCAGCGGAGACATGG	...*.....*...*..*...	4	0.0794169	0.0131765	NC_037109.1	65499598	65499620	-	intergenic:XM_024443194.1/XM_024443193.1/XM_024443191.1-XM_024443620.1
115forw	GTAGTCATTTAGCAGACACAGGG	GTAGTCATCTAGGAGACAACAGG	........*...*.....**	4	0.044438	0.0122605	NC_037099.1	75720039	75720061	+	intergenic:XM_024414320.1-XM_024410859.1/XR_002952555.1/XM_024410853.1/XM_024410879.1
115forw	GTAGTCATTTAGCAGACACAGGG	GTAGTCATGTAGCCTACACTAGG	........*....**....*	4	0.0145564	0.0113703	NC_037129.1	1374256	1374278	-	intergenic:XM_024397021.1-XM_024398227.1
115forw	GTAGTCATTTAGCAGACACAGGG	GTAATCATTCTGCAGAGACATGG	...*.....**.....*...	4	0.295815	0.00868778	NC_037103.1	70289996	70290018	-	intron:LOC112254871
115forw	GTAGTCATTTAGCAGACACAGGG	GTAATCATTCTGCAGAGACATGG	...*.....**.....*...	4	0.295815	0.00868778	NC_037124.1	26660798	26660820	+	intergenic:XM_024392263.1-XM_024391773.1
115forw	GTAGTCATTTAGCAGACACAGGG	GTAATCATTCTGCAGAGACATGG	...*.....**.....*...	4	0.295815	0.00868778	NC_037101.1	86635491	86635513	+	intergenic:XM_024422348.1-XM_024422354.1
115forw	GTAGTCATTTAGCAGACACAGGG	GTAATCATTCTGCAGAGACATGG	...*.....**.....*...	4	0.295815	0.00868778	NC_037097.1	89315970	89315992	+	intergenic:LOC112261396-XM_024434739.1
115forw	GTAGTCATTTAGCAGACACAGGG	GTAATCATTCTGCAGAGACATGG	...*.....**.....*...	4	0.295815	0.00868778	NC_037097.1	90210210	90210232	+	intergenic:XM_024434336.1-XM_024434728.1
115forw	GTAGTCATTTAGCAGACACAGGG	GTAGTCACTTTGCCGACAGATGG	.......*..*..*....*.	4	0.0372688	0.00824176	NC_037107.1	12895480	12895502	+	intergenic:XM_024436796.1/XM_024436795.1/XM_024436794.1/XM_024436793.1/XM_024436792.1-XM_024436796.1/XM_024436794.1/XM_024436793.1/XM_024436792.1
115forw	GTAGTCATTTAGCAGACACAGGG	GTAGTCACTTTGCCGACAGATGG	.......*..*..*....*.	4	0.0372688	0.00824176	NW_020128834.1	2590966	2590988	-	intergenic:XM_024402469.1/XM_024402466.1/XM_024402465.1/XM_024402464.1-XM_024402469.1/XM_024402468.1/XM_024402466.1/XM_024402465.1/XM_024402464.1
115forw	GTAGTCATTTAGCAGACACAGGG	GTATTCATTTAGCTGGCAGATGG	...*.........*.*..*.	4	0.012782	0.004662	NC_037100.1	45727666	45727688	+	intergenic:XM_024418223.1/XM_024418222.1-XM_024419341.1
115forw	GTAGTCATTTAGCAGACACAGGG	GTAGTCATGCAGCAGGGACAGGG	........**.....**...	4	0.0508633	0.00373483	NC_037097.1	83878095	83878117	+	intron:XM_024432787.1
115forw	GTAGTCATTTAGCAGACACAGGG	GTAGTCATATCACAGTCACAAGG	........*.**...*....	4	0.039169	0	NC_037125.1	9572669	9572691	-	intron:XM_024392304.1
115forw	GTAGTCATTTAGCAGACACAGGG	GTAGACATTTTGCAGCCAAAAGG	....*.....*....*..*.	4	0.0452	0	NC_037098.1	44604940	44604962	+	intergenic:XM_024381737.1/XM_024381728.1/XM_024381720.1/XM_024381709.1-XM_024381766.1/XM_024381760.1
115forw	GTAGTCATTTAGCAGACACAGGG	GTAGACATTTAGCAGTCTTATGG	....*..........*.**.	4	0.0159625	0	NW_020128826.1	946762	946784	+	intergenic:XM_024401956.1-XM_024401958.1
115forw	GTAGTCATTTAGCAGACACAGGG	GTAGACATTTAGCAGTCTTATGG	....*..........*.**.	4	0.0159625	0	NC_037127.1	20048251	20048273	+	intergenic:XM_024395589.1-XM_024395144.1
115forw	GTAGTCATTTAGCAGACACAGGG	GTAGTCATTGAGCAGTAATAAGG	.........*.....**.*.	4	0.0274862	0	NC_037103.1	79974519	79974541	-	intron:XM_024428094.1
115forw	GTAGTCATTTAGCAGACACAGGG	GTAGTCATCTCACAGTCACACGG	........*.**...*....	4	0.039169	0	NC_037125.1	9571753	9571775	-	intron:XM_024392304.1
115forw	GTAGTCATTTAGCAGACACAGGG	TTAGTCATTCAGCAGTCTCATGG	*........*.....*.*..	4	0.0491605	0	NC_037127.1	10691938	10691960	+	intergenic:XM_024395070.1-XM_024395355.1
115forw	GTAGTCATTTAGCAGACACAGGG	GTAGACCTTTAGGAGTCACAAGG	....*.*.....*..*....	4	0.0650453	0	NW_020142658.1	218012	218034	+	intron:LOC112247649
115forw	GTAGTCATTTAGCAGACACAGGG	GTAGACCTTTAGGAGTCACAAGG	....*.*.....*..*....	4	0.0650453	0	NC_037103.1	4496890	4496912	-	intron:LOC112255138
115forw	GTAGTCATTTAGCAGACACAGGG	GTAGTCATCTCACAGTCACACGG	........*.**...*....	4	0.039169	0	NW_020142633.1	585855	585877	-	intron:XM_024416318.1
115forw	GTAGTCATTTAGCAGACACAGGG	GTAGTCATATCACAGTCACAAGG	........*.**...*....	4	0.039169	0	NW_020142633.1	586771	586793	-	intron:XM_024416318.1
115forw	GTAGTCATTTAGCAGACACAGGG	TTAGTTGTTTAGCAGTCACATGG	*....**........*....	4	0.112532	0	NC_037102.1	43814069	43814091	+	intergenic:LOC112253495-XM_024425372.1
115forw	GTAGTCATTTAGCAGACACAGGG	GTATTCATTTCACAGTCACATGG	...*......**...*....	4	0.0705981	0	NC_037103.1	77353003	77353025	-	intergenic:XM_024428040.1-XM_024428349.1
115forw	GTAGTCATTTAGCAGACACAGGG	GCTGTCACTTAGCAGACACATGG	.**....*............	3	2.5079	0.605042	NC_037104.1	61967943	61967965	-	intergenic:XM_024428619.1-XR_002954470.1
115forw	GTAGTCATTTAGCAGACACAGGG	TCAGTCATTTAGCAGACATACGG	**................*.	3	1.12712	0.395604	NC_037106.1	56274781	56274803	-	intergenic:XM_024436227.1-XM_024436228.1
115forw	GTAGTCATTTAGCAGACACAGGG	TCAGTCATTTAGCAGACATACGG	**................*.	3	1.12712	0.395604	NC_037106.1	56274424	56274446	-	intergenic:XM_024436227.1-XM_024436228.1
115forw	GTAGTCATTTAGCAGACACAGGG	TTAGTCATTTAGCAGACGCTCGG	*................*.*	3	0.29245	0.24	NW_020129085.1	131845	131867	-	intron:XM_024405309.1
115forw	GTAGTCATTTAGCAGACACAGGG	TGAGCCATTTAGCAGACACACAG	**..*...............	3	0.485313	0.217778	NC_037124.1	12187840	12187862	-	intron:XM_024392239.1
115forw	GTAGTCATTTAGCAGACACAGGG	GTAGACAGTTAGCAGATACAAGG	....*..*........*...	3	1.14476	0.171111	NW_020130740.1	35311	35333	-	intron:XM_024408908.1
115forw	GTAGTCATTTAGCAGACACAGGG	GTAGGCATTTAGCAGAAAAAGGG	....*...........*.*.	3	0.382127	0.128	NW_020142510.1	4552326	4552348	-	intron:XM_024413160.1
115forw	GTAGTCATTTAGCAGACACAGGG	GTAGGCATTTAGCAGAAAAAGGG	....*...........*.*.	3	0.382127	0.128	NC_037102.1	33409735	33409757	+	intron:XM_024425442.1
115forw	GTAGTCATTTAGCAGACACAGGG	TTTGTCATTTAGCAGACACTTAG	*.*................*	3	0.29424	0.109804	NC_037100.1	27597367	27597389	+	intergenic:XM_024417580.1/XM_024417581.1/XM_024417578.1/XM_024417577.1-XM_024417582.1
115forw	GTAGTCATTTAGCAGACACAGGG	TTTGTCATTTAGCAGACACTCAG	*.*................*	3	0.29424	0.109804	NC_037103.1	59013554	59013576	-	intron:XM_024428473.1
115forw	GTAGTCATTTAGCAGACACAGGG	TCAGTCATTTAGCAGACATACAG	**................*.	3	0.225424	0.102564	NC_037104.1	18935404	18935426	+	intron:XM_024428546.1
115forw	GTAGTCATTTAGCAGACACAGGG	TTGGTCATTTAGCAGACACTAAG	*.*................*	3	0.29424	0.0950617	NC_037103.1	51763145	51763167	-	intergenic:XM_024427127.1/XM_024427128.1-XM_024427134.1/XM_024427133.1/XM_024427132.1/XM_024427131.1/XM_024427130.1/XM_024427129.1
115forw	GTAGTCATTTAGCAGACACAGGG	TTTGTCATTTAGCAGACATACAG	*.*...............*.	3	0.222268	0.0844646	NC_037106.1	7259265	7259287	-	intron:XM_024436356.1
115forw	GTAGTCATTTAGCAGACACAGGG	GCAATCATTTATCAGACACATAG	.*.*.......*........	3	0.276978	0.0769231	NC_037100.1	8074021	8074043	-	intergenic:XM_024415786.1-XR_002953366.1
115forw	GTAGTCATTTAGCAGACACAGGG	TTGGTCATTTAGCAGACATACAG	*.*...............*.	3	0.222268	0.0731244	NC_037106.1	7243123	7243145	+	intron:XM_024436356.1
115forw	GTAGTCATTTAGCAGACACAGGG	ATAGACATTTAGCAGACACTTAG	*...*..............*	3	0.298418	0.07	NC_037113.1	17422077	17422099	+	exon:XM_024377174.1/XM_024377173.1
115forw	GTAGTCATTTAGCAGACACAGGG	GTAGTCATTTAGTAGAACCATGG	............*...**..	3	0.070863	0.0622222	NW_020132115.1	18851	18873	+	intergenic:LOC112241901-Gap
115forw	GTAGTCATTTAGCAGACACAGGG	TAAGTAATTTAGCAGACACAGGA	**...*..............	3	0.293614	0.0545635	NW_020128854.1	171464	171486	-	intron:XM_024403174.1
115forw	GTAGTCATTTAGCAGACACAGGG	GTGCTCATTTAGCAGACAAATAG	..**..............*.	3	0.208156	0.0359477	NC_037108.1	3210365	3210387	-	intron:XM_024440531.1
115forw	GTAGTCATTTAGCAGACACAGGG	GTTTTCATTCAGCAGACACAGAG	..**.....*..........	3	0.461955	0.0354922	NC_037106.1	49281789	49281811	+	intergenic:XM_024435912.1-XM_024435915.1/XM_024435914.1/XM_024435913.1
115forw	GTAGTCATTTAGCAGACACAGGG	TGAGTCATTTAGCAGACACTCGA	**.................*	3	0.298418	0.035	NC_037098.1	215066	215088	-	intron:XM_024385621.1
115forw	GTAGTCATTTAGCAGACACAGGG	TTAGTCAATTAGCAGACACTGGA	*......*...........*	3	0.298418	0.0333333	NC_037103.1	48576975	48576997	+	intron:XM_024427016.1
115forw	GTAGTCATTTAGCAGACACAGGG	ACAGTCATTTAGCAGACACTTGA	**.................*	3	0.298418	0.0321429	NC_037109.1	46675957	46675979	-	intron:XM_024443571.1
115forw	GTAGTCATTTAGCAGACACAGGG	GTAGTCAGTTAGTAGAGACATGG	.......*....*...*...	3	0.398158	0.0301961	NW_020130885.1	12556	12578	-	intron:XM_024409051.1
115forw	GTAGTCATTTAGCAGACACAGGG	TGAGTCATTTAGCAGAAACAGGA	**..............*...	3	0.258025	0.0272222	NC_037118.1	21928297	21928319	+	intergenic:XM_024384653.1/XM_024384656.1-XM_024384654.1
115forw	GTAGTCATTTAGCAGACACAGGG	TACGTCATTTAGCAGACACACGA	***.................	3	0.457485	0.0251832	NW_020128804.1	173769	173791	+	intergenic:XM_024399018.1/XM_024399017.1-XM_024399017.1
115forw	GTAGTCATTTAGCAGACACAGGG	TACGTCATTTAGCAGACACACGA	***.................	3	0.457485	0.0251832	NC_037108.1	57346942	57346964	-	intergenic:XM_024439950.1-XM_024439951.1/XM_024439950.1
115forw	GTAGTCATTTAGCAGACACAGGG	TGAGTCATTTAGCAGACACCTGA	**.................*	3	0.298418	0.0132576	NC_037128.1	860548	860570	-	intron:LOC112230190
115forw	GTAGTCATTTAGCAGACACAGGG	GTAGCCATTTAGCAGTCTCATGG	....*..........*.*..	3	0.100239	0	NW_020129075.1	147334	147356	+	intron:XM_024405240.1/XM_024405239.1
115forw	GTAGTCATTTAGCAGACACAGGG	TCAGTCATTTAGCAGACACACGG	**..................	2	5.21978	0.857143	NC_037106.1	56275190	56275212	-	intergenic:XM_024436227.1-XM_024436228.1
115forw	GTAGTCATTTAGCAGACACAGGG	TTAGTCATTTAGCAGACGCAAGG	*................*..	2	3.44815	0.4	NC_037104.1	48593511	48593533	+	intron:XM_024429892.1
115forw	GTAGTCATTTAGCAGACACAGGG	TTAGTCATTTAGCAGACACTCAG	*..................*	2	2.085	0.155556	NC_037099.1	73721833	73721855	-	intron:XM_024388417.1
115forw	GTAGTCATTTAGCAGACACAGGG	TTAGTCATTTAGCAGACACTGAG	*..................*	2	2.085	0.155556	NC_037129.1	26362438	26362460	+	intergenic:LOC112230644-XM_024397786.1/XM_024397785.1/XM_024397784.1
115forw	GTAGTCATTTAGCAGACACAGGG	TTAGTCATTTAGCAGACACTCAG	*..................*	2	2.085	0.155556	NW_020128804.1	1294840	1294862	-	intergenic:XM_024399040.1-XR_002950605.1
115forw	GTAGTCATTTAGCAGACACAGGG	TTAGTCATTTAGCAGACACTCAG	*..................*	2	2.085	0.155556	NC_037108.1	56225871	56225893	+	intergenic:XR_002955588.1-XM_024439933.1
115forw	GTAGTCATTTAGCAGACACAGGG	TTAGTCATTTAGCAGACATACAG	*.................*.	2	1.30109	0.119658	NW_020128877.1	232185	232207	+	intron:XM_024403677.1
115forw	GTAGTCATTTAGCAGACACAGGG	GTAGTCCTTTAGCAGATACACAG	......*.........*...	2	0.454195	0.0529321	NC_037104.1	68115293	68115315	+	intron:LOC112255799
115forw	GTAGTCATTTAGCAGACACAGGG	TTAGTCATTTAGCAGGCACACAG	*..............*....	2	0.466857	0.0498575	NC_037112.1	26990639	26990661	-	intergenic:XM_024376549.1-XM_024374828.1/XM_024374827.1/XM_024374825.1
115forw	GTAGTCATTTAGCAGACACAGGG	TTAGTCATTTAGCAGACACTGGA	*..................*	2	2.085	0.0416667	NC_037120.1	9485485	9485507	-	intergenic:XM_024386516.1-LOC112223484
115forw	GTAGTCATTTAGCAGACACAGGG	TTAGTCATTTAGCAGACACTCGA	*..................*	2	2.085	0.0416667	NC_037104.1	7443312	7443334	-	intergenic:XR_002954499.1-XM_024428811.1
115forw	GTAGTCATTTAGCAGACACAGGG	GTAGTAATTTAGCAGACACTTGA	.....*.............*	2	0.61454	0.0386905	NC_037121.1	21008040	21008062	-	intergenic:XM_024387999.1-XM_024388000.1
115forw	GTAGTCATTTAGCAGACACAGGG	TTAGTCATTTAGCAGACGCACGA	*................*..	2	0.68963	0.0277778	NW_020128829.1	279370	279392	+	intergenic:XM_024402179.1-XM_024402182.1/XM_024402181.1
115forw	GTAGTCATTTAGCAGACACAGGG	TTAGTCATTTAGCAGACGCACGA	*................*..	2	0.68963	0.0277778	NC_037124.1	37939790	37939812	-	intergenic:XM_024392158.1/XM_024392157.1-XM_024392161.1
115forw	GTAGTCATTTAGCAGACACAGGG	TTAGTCATTTAGCAGACGCACGA	*................*..	2	0.68963	0.0277778	NW_020142548.1	3285209	3285231	-	intergenic:XM_024415390.1/XM_024415389.1-XM_024415388.1
122rev	TCACTTGAGCAAATTGCTGCTGG	TAAATAAAGCAAATTGCTGCTGG	.*.*.**.............	4	0.539223	0.530781	NC_037115.1	47296854	47296876	-	intergenic:LOC112218883-XM_024380358.1
122rev	TCACTTGAGCAAATTGCTGCTGG	GGACTTGAGCAAGTTACTGCAGG	**..........*..*....	4	0.105393	0.433961	NC_037111.1	38347569	38347591	-	intron:XM_024373891.1/XM_024373890.1
122rev	TCACTTGAGCAAATTGCTGCTGG	TCACTTGGGCAGATTACAGCTGG	.......*...*...*.*..	4	0.0237304	0.353086	NC_037114.1	26127717	26127739	+	intergenic:XM_024378305.1-XR_002948507.1
122rev	TCACTTGAGCAAATTGCTGCTGG	AAACTTGGGCAAGTTGCTGCAGG	**.....*....*.......	4	0.581725	0.347826	NC_037101.1	48040465	48040487	+	intergenic:LOC112251531-XM_024420928.1
122rev	TCACTTGAGCAAATTGCTGCTGG	GGACTTGGGCAAGTTGCTGCGGG	**.....*....*.......	4	0.581725	0.318238	NC_037117.1	673974	673996	+	intron:LOC112220703
122rev	TCACTTGAGCAAATTGCTGCTGG	GGACTTGGGCAAGTTGCTGCGGG	**.....*....*.......	4	0.581725	0.318238	NW_020128805.1	1588340	1588362	-	intergenic:XM_024399619.1/XM_024399618.1/XM_024399617.1-XM_024399617.1
122rev	TCACTTGAGCAAATTGCTGCTGG	GGACTTGGGCAAGTTGCTGCAGG	**.....*....*.......	4	0.581725	0.318238	NC_037102.1	28338593	28338615	+	intergenic:XR_002953987.1-XM_024423671.1/XM_024423670.1
122rev	TCACTTGAGCAAATTGCTGCTGG	GGACTTGGGCAAGTTGCTGCAGG	**.....*....*.......	4	0.581725	0.318238	NW_020142498.1	1379947	1379969	-	intergenic:XM_024412553.1-LOC112244743
122rev	TCACTTGAGCAAATTGCTGCTGG	GGACTTGGGCAAGTTGCTGCAGG	**.....*....*.......	4	0.581725	0.318238	NC_037114.1	4251387	4251409	-	intergenic:XM_024378647.1-XM_024377671.1/XM_024377670.1/XM_024377667.1/XM_024377663.1/XM_024377662.1/XM_024377661.1/XM_024377669.1/XM_024377668.1/XM_024377666.1/XM_024377665.1/XM_024377664.1/XM_024377672.1
122rev	TCACTTGAGCAAATTGCTGCTGG	GGACTTGGGCAAGTTGCTGCAGG	**.....*....*.......	4	0.581725	0.318238	NW_020142510.1	15756314	15756336	-	intergenic:XM_024413183.1/XM_024413182.1-XR_002952710.1
122rev	TCACTTGAGCAAATTGCTGCTGG	GGACTTGGGCAAGTTGCTGCAGG	**.....*....*.......	4	0.581725	0.318238	NC_037099.1	18559184	18559206	+	intergenic:XM_024386925.1-XM_024386938.1
122rev	TCACTTGAGCAAATTGCTGCTGG	GGACTTGGGCAAGTTGCTGCGGG	**.....*....*.......	4	0.581725	0.318238	NC_037112.1	51717607	51717629	+	intergenic:XM_024375788.1-XM_024375790.1/XM_024375789.1/XM_024375788.1
122rev	TCACTTGAGCAAATTGCTGCTGG	GGACTTGGGCAAGTTGCTGCGGG	**.....*....*.......	4	0.581725	0.318238	NC_037104.1	68639264	68639286	+	intron:XM_024430531.1
122rev	TCACTTGAGCAAATTGCTGCTGG	GGACTTGGGCAAGTTGCTGCAGG	**.....*....*.......	4	0.581725	0.318238	NW_020128964.1	361644	361666	+	intergenic:XM_024404560.1-XM_024404561.1
122rev	TCACTTGAGCAAATTGCTGCTGG	GGACTTGGGCAAGTTGCTGCGGG	**.....*....*.......	4	0.581725	0.318238	NC_037101.1	15120827	15120849	+	intron:LOC112249853
122rev	TCACTTGAGCAAATTGCTGCTGG	GGACTTGGGCAAGTTGCTGCAGG	**.....*....*.......	4	0.581725	0.318238	NC_037100.1	46126937	46126959	+	intergenic:XM_024418235.1/XM_024418234.1/XM_024418233.1/XM_024418232.1/XM_024418230.1/XR_002953282.1-XM_024418237.1
122rev	TCACTTGAGCAAATTGCTGCTGG	GGACTTGGGCAAGTTGCTGCGGG	**.....*....*.......	4	0.581725	0.318238	NC_037103.1	56226063	56226085	+	intergenic:XM_024427216.1-XM_024427217.1
122rev	TCACTTGAGCAAATTGCTGCTGG	GGACTTGGGCAAGTTGCTGCAGG	**.....*....*.......	4	0.581725	0.318238	NW_020128964.1	625918	625940	-	intergenic:XM_024404572.1-XM_024404573.1
122rev	TCACTTGAGCAAATTGCTGCTGG	GGACTTGGGCAAGTTGCTGCGGG	**.....*....*.......	4	0.581725	0.318238	NC_037100.1	50487863	50487885	+	intron:XM_024418405.1
122rev	TCACTTGAGCAAATTGCTGCTGG	GGACTTGGGCAAGTTGCTGCAGG	**.....*....*.......	4	0.581725	0.318238	NW_020128814.1	4680875	4680897	-	intergenic:XM_024401049.1-XM_024401061.1/XM_024401060.1/XM_024401057.1/XM_024401052.1/XM_024401051.1/XM_024401050.1/XM_024401059.1/XM_024401058.1/XM_024401056.1/XM_024401055.1/XM_024401054.1/XM_024401062.1
122rev	TCACTTGAGCAAATTGCTGCTGG	TGACTAGAGAAAATAGCTGCTGG	.*...*...*....*.....	4	0.224469	0.302507	NC_037118.1	9855446	9855468	-	intergenic:XM_024383643.1-LOC112221721
122rev	TCACTTGAGCAAATTGCTGCTGG	GGGCTTGGGCAAATTGCTGCAGG	***....*............	4	1.34583	0.298201	NC_037120.1	12994690	12994712	-	intron:XM_024386646.1
122rev	TCACTTGAGCAAATTGCTGCTGG	GGGCTTGGGCAAATTGCTGCAGG	***....*............	4	1.34583	0.298201	NC_037108.1	18644859	18644881	+	intron:XM_024438536.1
122rev	TCACTTGAGCAAATTGCTGCTGG	GGGCTTGGGCAAATTGCTGCGGG	***....*............	4	1.34583	0.298201	NW_020129852.1	119440	119462	+	intergenic:XM_024407627.1-Gap
122rev	TCACTTGAGCAAATTGCTGCTGG	GGGCTTGGGCAAATTGCTGCGGG	***....*............	4	1.34583	0.298201	NC_037129.1	26996712	26996734	+	intergenic:XM_024397795.1/XM_024397794.1/XM_024397793.1-XM_024397796.1/XM_024397797.1/XM_024397798.1
122rev	TCACTTGAGCAAATTGCTGCTGG	GGGCTTGGGCAAATTGCTGCAGG	***....*............	4	1.34583	0.298201	NC_037107.1	45582638	45582660	+	intron:XM_024437849.1
122rev	TCACTTGAGCAAATTGCTGCTGG	GGGCTTGGGCAAATTGCTGCAGG	***....*............	4	1.34583	0.298201	NC_037124.1	34023319	34023341	-	intron:XM_024390785.1
122rev	TCACTTGAGCAAATTGCTGCTGG	GGGCTTGGGCAAATTGCTGCGGG	***....*............	4	1.34583	0.298201	NW_020129852.1	115586	115608	+	intergenic:XM_024407627.1-Gap
122rev	TCACTTGAGCAAATTGCTGCTGG	GGGCTTGGGCAAATTGCTGCGGG	***....*............	4	1.34583	0.298201	NC_037099.1	70247226	70247248	+	intergenic:XM_024410012.1-XM_024388228.1
122rev	TCACTTGAGCAAATTGCTGCTGG	GCGCTTGGGCAAGTTGCTGCGGG	*.*....*....*.......	4	0.573581	0.279563	NC_037104.1	36849315	36849337	+	intron:XM_024429686.1
122rev	TCACTTGAGCAAATTGCTGCTGG	GCGCTTGGGCAAGTTGCTGCGGG	*.*....*....*.......	4	0.573581	0.279563	NC_037125.1	30240176	30240198	+	intergenic:XM_024393150.1-XM_024393152.1
122rev	TCACTTGAGCAAATTGCTGCTGG	TTGCTTGGGCAAGTTGCTGCGGG	.**....*....*.......	4	0.545938	0.2657	NC_037097.1	93713807	93713829	-	intergenic:XM_024428306.1-XM_024435017.1
122rev	TCACTTGAGCAAATTGCTGCTGG	GGGCTTGAGCAAGTTGCTGCGGG	***.........*.......	4	0.573581	0.265198	NC_037110.1	40291025	40291047	+	intergenic:XM_024445299.1-XM_024445329.1/XM_024445328.1/XM_024445327.1/XM_024445326.1/XM_024445324.1/XM_024445323.1/XM_024445322.1/XM_024445321.1/XM_024445320.1/XM_024445319.1/XM_024445318.1/XM_024445317.1/XM_024445316.1/XM_024445315.1/XM_024445312.1/XM_024445311.1/XM_024445310.1/XM_024445309.1/XM_024445308.1/XM_024445307.1/XM_024445306.1/XM_024445305.1/XM_024445304.1/XM_024445302.1/XM_024445301.1
122rev	TCACTTGAGCAAATTGCTGCTGG	GGGCTTGAGCAAGTTGCTGCGGG	***.........*.......	4	0.573581	0.265198	NW_020128841.1	1223607	1223629	-	intergenic:XM_024402945.1/XM_024402944.1-XM_024402947.1/XM_024402946.1
122rev	TCACTTGAGCAAATTGCTGCTGG	GGGCTTGAGCAAGTTGCTGCAGG	***.........*.......	4	0.573581	0.265198	NC_037097.1	61707185	61707207	+	intergenic:XM_024427454.1-XM_024422074.1
122rev	TCACTTGAGCAAATTGCTGCTGG	GGGCTTGAGCAAGTTGCTGCAGG	***.........*.......	4	0.573581	0.265198	NC_037110.1	39206670	39206692	+	intergenic:XM_024445236.1-XM_024445237.1
122rev	TCACTTGAGCAAATTGCTGCTGG	GGGCTTGAGCAAGTTGCTGCGGG	***.........*.......	4	0.573581	0.265198	NC_037100.1	18946860	18946882	+	intergenic:XM_024417204.1/XM_024417203.1-XM_024417206.1/XM_024417205.1
122rev	TCACTTGAGCAAATTGCTGCTGG	GGGCTTGAGCAAGTTGCTGCGGG	***.........*.......	4	0.573581	0.265198	NW_020142548.1	86481	86503	+	intergenic:XM_024415319.1-XM_024415393.1/XM_024415391.1
122rev	TCACTTGAGCAAATTGCTGCTGG	GGGCTTGAGCAAGTTGCTGCAGG	***.........*.......	4	0.573581	0.265198	NC_037103.1	20112279	20112301	-	intergenic:XM_024426165.1/XM_024426163.1/XM_024426162.1-XM_024426164.1
122rev	TCACTTGAGCAAATTGCTGCTGG	GGGCTTGAGCAAGTTGCTGCGGG	***.........*.......	4	0.573581	0.265198	NW_020128810.1	2336228	2336250	+	intergenic:XM_024400155.1-XM_024400157.1/XM_024400156.1
122rev	TCACTTGAGCAAATTGCTGCTGG	GGGCTTGAGCAAGTTGCTGCAGG	***.........*.......	4	0.573581	0.265198	NC_037097.1	92888405	92888427	-	intergenic:XM_024434863.1/XM_024434856.1-XM_024434901.1/XM_024434893.1/XM_024434883.1/XM_024434875.1
122rev	TCACTTGAGCAAATTGCTGCTGG	GGGCTTGAGCAAGTTGCTGCGGG	***.........*.......	4	0.573581	0.265198	NC_037107.1	18546422	18546444	+	intergenic:XM_024437000.1-XM_024438090.1
122rev	TCACTTGAGCAAATTGCTGCTGG	GGGCTTGAGCAAGTTGCTGCGGG	***.........*.......	4	0.573581	0.265198	NW_020128841.1	1223542	1223564	+	intergenic:XM_024402945.1/XM_024402944.1-XM_024402947.1/XM_024402946.1
122rev	TCACTTGAGCAAATTGCTGCTGG	GGGCTTGAGCAAGTTGCTGCGGG	***.........*.......	4	0.573581	0.265198	NC_037100.1	18946925	18946947	-	intergenic:XM_024417204.1/XM_024417203.1-XM_024417206.1/XM_024417205.1
122rev	TCACTTGAGCAAATTGCTGCTGG	TGTCTTGGGCAAGTTGCTGCGGG	.**....*....*.......	4	0.545938	0.234849	NC_037102.1	17977522	17977544	+	intron:XM_024423332.1/XM_024423331.1/XM_024423330.1
122rev	TCACTTGAGCAAATTGCTGCTGG	TCACCTCAGCAAATTGAAGCTGG	....*.*.........**..	4	0.0774719	0.213889	NC_037122.1	17809030	17809052	+	intergenic:XM_024389091.1/XM_024389092.1-XM_024389095.1
122rev	TCACTTGAGCAAATTGCTGCTGG	TGGCTTGGGCAAGTTGCTGCGGG	.**....*....*.......	4	0.545938	0.203319	NC_037104.1	60286502	60286524	+	intergenic:XM_024430333.1-XM_024430335.1/XM_024430334.1
122rev	TCACTTGAGCAAATTGCTGCTGG	TGGCTTGGGCAAGTTGCTGCAGG	.**....*....*.......	4	0.545938	0.203319	NC_037115.1	12884957	12884979	+	intergenic:XM_024379066.1-XM_024379068.1/XM_024379067.1
122rev	TCACTTGAGCAAATTGCTGCTGG	TGGCTTGGGCAAGTTGCTGCAGG	.**....*....*.......	4	0.545938	0.203319	NW_020128824.1	218739	218761	-	intergenic:XM_024401770.1/XM_024401769.1-XM_024401806.1
122rev	TCACTTGAGCAAATTGCTGCTGG	TGGCTTGGGCAAGTTGCTGCAGG	.**....*....*.......	4	0.545938	0.203319	NC_037103.1	56924581	56924603	+	intron:XM_024427252.1/XM_024427251.1
122rev	TCACTTGAGCAAATTGCTGCTGG	TGGCTTGGGCAAGTTGCTGCGGG	.**....*....*.......	4	0.545938	0.203319	NW_020128990.1	210267	210289	+	intergenic:XM_024404755.1-XR_002951184.1
122rev	TCACTTGAGCAAATTGCTGCTGG	TGGCTTGGGCAAGTTGCTGCAGG	.**....*....*.......	4	0.545938	0.203319	NC_037118.1	3145529	3145551	-	intergenic:XM_024383742.1/XM_024383741.1-XM_024383535.1
122rev	TCACTTGAGCAAATTGCTGCTGG	TGGCTTGGGCAAGTTGCTGCAGG	.**....*....*.......	4	0.545938	0.203319	NC_037126.1	18942196	18942218	-	intergenic:XM_024393230.1-XM_024393894.1
122rev	TCACTTGAGCAAATTGCTGCTGG	GCCCTTGGGCAAGTTGCTGCAGG	*.*....*....*.......	4	0.573581	0.196057	NC_037100.1	26399919	26399941	+	intron:XM_024417540.1/XM_024417539.1
122rev	TCACTTGAGCAAATTGCTGCTGG	TTACATTGGCAAATTGCTGCTGG	.*..*.**............	4	0.932256	0.190476	NC_037103.1	79792294	79792316	-	intergenic:XM_024428093.1/XM_024428092.1/XM_024428091.1/XM_024428090.1-XM_024428091.1/XM_024428090.1
122rev	TCACTTGAGCAAATTGCTGCTGG	ACACTGGAGCAAATTACGGCGGG	*....*.........*.*..	4	0.0322933	0.190476	NW_020128913.1	72048	72070	-	intergenic:XM_024404033.1/XM_024404032.1/XM_024404031.1/XM_024404030.1-Gap
122rev	TCACTTGAGCAAATTGCTGCTGG	TTCCTTGGGCAAGTTGCTGCGGG	.**....*....*.......	4	0.545938	0.186335	NC_037108.1	11150203	11150225	+	intergenic:LOC112262638-XR_002955390.1
122rev	TCACTTGAGCAAATTGCTGCTGG	GCACTTGGGCCAGTTGCTGCGGG	*......*..*.*.......	4	0.322857	0.182987	NC_037119.1	10331975	10331997	+	intergenic:XM_024385303.1-XM_024385776.1
122rev	TCACTTGAGCAAATTGCTGCTGG	TGACTTTGGCAAAATGCTGCAGG	.*....**.....*......	4	0.152973	0.180459	NC_037098.1	52206332	52206354	-	exon:XM_024383925.1/XM_024383916.1
122rev	TCACTTGAGCAAATTGCTGCTGG	TAACGTTAGCAAGTTGCTGCTGG	.*..*.*.....*.......	4	0.37817	0.173461	NW_020128805.1	1319731	1319753	+	intergenic:XM_024399590.1/XM_024399588.1-XM_024399591.1
122rev	TCACTTGAGCAAATTGCTGCTGG	TAACGTTAGCAAGTTGCTGCTGG	.*..*.*.....*.......	4	0.37817	0.173461	NC_037112.1	51986216	51986238	-	intergenic:XM_024375819.1-XM_024375818.1/XM_024375815.1
122rev	TCACTTGAGCAAATTGCTGCTGG	TCACGTGAGCCAATTACAGCAGG	....*.....*....*.*..	4	0.0281244	0.170667	NC_037101.1	82176895	82176917	-	intergenic:XM_024422263.1-XM_024422591.1
122rev	TCACTTGAGCAAATTGCTGCTGG	TGAGTTGGGCAAGTTGCTGCAGG	.*.*...*....*.......	4	0.55369	0.166352	NC_037100.1	71596382	71596404	+	intergenic:XM_024419193.1-XR_002953340.1
122rev	TCACTTGAGCAAATTGCTGCTGG	GGGCTTGAGCCAATTGCTGCGGG	***.......*.........	4	0.782934	0.162655	NC_037098.1	645897	645919	+	intergenic:XM_024439756.1/XM_024439747.1-XM_024439766.1/XM_024439756.1/XM_024439747.1/XM_024439737.1
122rev	TCACTTGAGCAAATTGCTGCTGG	TTAGTTGACCAAGTTGCTGCGGG	.*.*....*...*.......	4	0.338304	0.159623	NC_037101.1	10456656	10456678	-	intergenic:XM_024419838.1/XM_024419837.1/XM_024419836.1/XM_024419834.1/XM_024419833.1/XM_024419832.1/XM_024419829.1-XR_002953762.1
122rev	TCACTTGAGCAAATTGCTGCTGG	ACACTTGGGCAAGTTGCTGTGGG	*......*....*......*	4	0.269912	0.143478	NC_037097.1	61064358	61064380	+	intron:XM_024427292.1
122rev	TCACTTGAGCAAATTGCTGCTGG	TTACATGAGCAAGTTGTTGCAGG	.*..*.......*...*...	4	0.235909	0.13834	NC_037110.1	22787909	22787931	-	intergenic:XR_002956103.1-XR_002956104.1
122rev	TCACTTGAGCAAATTGCTGCTGG	TCACCTGAGCCAATTGCAGAGGG	....*.....*......*.*	4	0.071822	0.133333	NC_037110.1	50121057	50121079	-	exon:XM_024445545.1
122rev	TCACTTGAGCAAATTGCTGCTGG	TCCCCTTACCAAATTGCTGCAGG	..*.*.*.*...........	4	0.561634	0.131868	NW_020142606.1	140891	140913	+	exon:XM_024416132.1
122rev	TCACTTGAGCAAATTGCTGCTGG	TCACTTGATCAGGTTGTTGCTGG	........*..**...*...	4	0.0611353	0.11723	NC_037109.1	64191764	64191786	+	intron:XM_024443157.1
122rev	TCACTTGAGCAAATTGCTGCTGG	GGACTTGAGCAAATAGCTGTCGG	**............*....*	4	0.186916	0.115571	NW_020142630.1	520034	520056	+	intergenic:XM_024416269.1/XM_024416267.1/XM_024416271.1/XM_024416268.1/XM_024416265.1/XM_024416264.1/XM_024416270.1/XM_024416266.1-XM_024416271.1/XM_024416270.1/XM_024416269.1/XM_024416268.1/XM_024416267.1/XM_024416266.1/XM_024416265.1/XM_024416264.1
122rev	TCACTTGAGCAAATTGCTGCTGG	GGACTTGAGCAAATAGCTGTCGG	**............*....*	4	0.186916	0.115571	NC_037106.1	47300983	47301005	+	intergenic:XM_024435837.1/XM_024435835.1/XM_024435839.1/XM_024435836.1/XM_024435832.1/XM_024435831.1/XM_024435838.1/XM_024435834.1-XM_024435839.1/XM_024435838.1/XM_024435837.1/XM_024435836.1/XM_024435835.1/XM_024435834.1/XM_024435832.1/XM_024435831.1
122rev	TCACTTGAGCAAATTGCTGCTGG	TGATTTGAGCCAATTGCTGAGGG	.*.*......*........*	4	0.387083	0.111304	NC_037108.1	16551882	16551904	+	intron:XM_024438451.1
122rev	TCACTTGAGCAAATTGCTGCTGG	TGACTTGGGCATGTTGCTGCAGG	.*.....*...**.......	4	0.272415	0.110901	NC_037129.1	4864869	4864891	+	intergenic:XM_024397089.1/XM_024397088.1/XM_024397087.1/XM_024397085.1/XM_024397084.1/XM_024397083.1-XM_024397091.1/XM_024397090.1
122rev	TCACTTGAGCAAATTGCTGCTGG	TCATTTGAGCATATAGCTACAGG	...*.......*..*...*.	4	0.0657632	0.110276	NC_037097.1	71917103	71917125	-	exon:XM_024429595.1
122rev	TCACTTGAGCAAATTGCTGCTGG	TAATTTGCGGAAATTGCTGCTGG	.*.*...*.*..........	4	1.25711	0.0969697	NW_020128845.1	55168	55190	+	intron:XM_024403098.1
122rev	TCACTTGAGCAAATTGCTGCTGG	TAACCTGAGCACATTGCTCCTGG	.*..*......*......*.	4	0.245385	0.0857944	NC_037106.1	23661553	23661575	+	intron:XM_024435023.1
122rev	TCACTTGAGCAAATTGCTGCTGG	TAACTTGAGCCAGTTGCTCCCGG	.*........*.*.....*.	4	0.107124	0.0850484	NC_037097.1	93340894	93340916	-	intergenic:XM_024434996.1/XM_024434987.1-XM_024428306.1/XM_024428260.1/XM_024428209.1/XM_024428149.1
122rev	TCACTTGAGCAAATTGCTGCTGG	TCTCTTTGGCAAATCGCTGCAGG	..*...**......*.....	4	0.271293	0.0806723	NC_037101.1	11339499	11339521	+	intergenic:XM_024419880.1/XM_024419879.1-XM_024419568.1
122rev	TCACTTGAGCAAATTGCTGCTGG	CCAGGTGAGCAAACTGCTGCAGG	*..**........*......	4	0.223972	0.0783673	NC_037118.1	39793102	39793124	-	intergenic:XM_024385233.1-XM_024383622.1
122rev	TCACTTGAGCAAATTGCTGCTGG	TCACTTGAGGAGATAGATGCTGG	.........*.*..*.*...	4	0.0638167	0.0758826	NC_037107.1	10259344	10259366	-	intron:LOC112261424
122rev	TCACTTGAGCAAATTGCTGCTGG	TCACTTGAGGAGATAGATGCTGG	.........*.*..*.*...	4	0.0638167	0.0758826	NW_020128834.1	5227102	5227124	+	intron:LOC112234422
122rev	TCACTTGAGCAAATTGCTGCTGG	TAACTTGAGCATGTTGCTCCCGG	.*.........**.....*.	4	0.094964	0.0708737	NW_020142548.1	272981	273003	+	intron:LOC112246790
122rev	TCACTTGAGCAAATTGCTGCTGG	TAACTTGAGCATGTTGCTCCCGG	.*.........**.....*.	4	0.094964	0.0708737	NW_020128810.1	2522728	2522750	+	intron:LOC112232856
122rev	TCACTTGAGCAAATTGCTGCTGG	TCCCTGGAGCAAGTTGCCGCGGG	..*..*......*....*..	4	0.0716427	0.0684497	NC_037129.1	36994527	36994549	+	intergenic:XM_024396974.1-LOC112230724
122rev	TCACTTGAGCAAATTGCTGCTGG	TCAGTTGAACAAATTGCAGTAGG	...*....*........*.*	4	0.0790689	0.0642857	NC_037118.1	9500392	9500414	-	intron:XM_024383966.1
122rev	TCACTTGAGCAAATTGCTGCTGG	TAACTTGAGCACGTTGCTCCCGG	.*.........**.....*.	4	0.094964	0.0559529	NC_037115.1	17824906	17824928	+	intergenic:XM_024380396.1-XR_002948617.1
122rev	TCACTTGAGCAAATTGCTGCTGG	TAACTTGAGCCCATTGCTACTGG	.*........**......*.	4	0.136189	0.0546822	NC_037115.1	18929527	18929549	-	intron:XM_024379171.1
122rev	TCACTTGAGCAAATTGCTGCTGG	TCCCTTGGGCAAATTGCGGATGG	..*....*.........*.*	4	0.127597	0.052381	NC_037119.1	2464513	2464535	-	exon:XM_024385457.1/XM_024385456.1/XM_024385455.1/XM_024385454.1
122rev	TCACTTGAGCAAATTGCTGCTGG	ACACTTCAGCAACTTGCGGCTGG	*.....*.....*....*..	4	0.0820276	0.0482456	NC_037130.1	3119778	3119800	-	intergenic:XM_024398436.1-XM_024398437.1
122rev	TCACTTGAGCAAATTGCTGCTGG	TCACTTCAACAACTTGCTGAGGG	......*.*...*......*	4	0.101231	0.0465226	NC_037100.1	23263888	23263910	-	intergenic:XM_024417413.1-XM_024417418.1/XM_024417417.1
122rev	TCACTTGAGCAAATTGCTGCTGG	TCAATTGAGCACATTGTTCCTGG	...*.......*....*.*.	4	0.0944732	0.0463591	NC_037124.1	28594073	28594095	-	intron:XM_024391830.1
122rev	TCACTTGAGCAAATTGCTGCTGG	TCACTTGGGCTCATTGCAGCAGG	.......*..**.....*..	4	0.0765719	0.0395861	NC_037125.1	13331530	13331552	+	intergenic:XM_024392605.1-XM_024392606.1
122rev	TCACTTGAGCAAATTGCTGCTGG	TCACTTGGGCTCATTGCAGCAGG	.......*..**.....*..	4	0.0765719	0.0395861	NW_020128817.1	315478	315500	-	intergenic:XM_024401305.1-XM_024401307.1
122rev	TCACTTGAGCAAATTGCTGCTGG	TCACTTGGGCTCATTGCAGCAGG	.......*..**.....*..	4	0.0765719	0.0395861	NC_037110.1	10187290	10187312	-	intergenic:LOC112267725-XM_024444116.1/XM_024444117.1
122rev	TCACTTGAGCAAATTGCTGCTGG	TCACTTGGGCTCATTGCAGCAGG	.......*..**.....*..	4	0.0765719	0.0395861	NC_037103.1	8286390	8286412	+	intergenic:XM_024425768.1/XM_024425769.1-XM_024425772.1/XM_024425770.1
122rev	TCACTTGAGCAAATTGCTGCTGG	TCACTTGGGCTCATTGCAGCAGG	.......*..**.....*..	4	0.0765719	0.0395861	NC_037103.1	17577662	17577684	+	intergenic:XM_024426106.1/XM_024426107.1-LOC112255183
122rev	TCACTTGAGCAAATTGCTGCTGG	TCACTTGGGCTCATTGCAGCAGG	.......*..**.....*..	4	0.0765719	0.0395861	NC_037103.1	13042961	13042983	-	intergenic:XM_024425970.1/XM_024425968.1-XM_024425971.1/XM_024425972.1
122rev	TCACTTGAGCAAATTGCTGCTGG	TCCCTTGAGCGAATTGCTCTAGG	..*.......*.......**	4	0.113812	0.0374631	NW_020142643.1	193506	193528	-	intron:XM_024416411.1
122rev	TCACTTGAGCAAATTGCTGCTGG	TAACTTGAGCCCATTGCTCCCGG	.*........**......*.	4	0.136189	0.0343178	NC_037115.1	41057025	41057047	-	intron:XM_024379874.1
122rev	TCACTTGAGCAAATTGCTGCTGG	TAACTTGAGCCCATTGCTCCCGG	.*........**......*.	4	0.136189	0.0343178	NC_037115.1	458253	458275	-	intron:XM_024378734.1
122rev	TCACTTGAGCAAATTGCTGCTGG	TAACTTGAGCCCATTGCTCCTGG	.*........**......*.	4	0.136189	0.0343178	NC_037109.1	44119574	44119596	-	intergenic:XM_024442287.1-XM_024442286.1
122rev	TCACTTGAGCAAATTGCTGCTGG	TCCCTTTAGCAATTTGTTGCTGG	..*...*.....*...*...	4	0.150826	0.0342857	NC_037108.1	26682238	26682260	+	intergenic:XM_024438887.1/XM_024438885.1/XM_024438883.1/XM_024438890.1/XM_024438889.1/XM_024438888.1/XM_024438886.1/XM_024438884.1-XM_024438890.1/XM_024438889.1/XM_024438888.1/XM_024438887.1/XM_024438886.1/XM_024438885.1/XM_024438884.1/XM_024438883.1
122rev	TCACTTGAGCAAATTGCTGCTGG	TCACCTGAGGAATCTGCTGCTGG	....*....*..**......	4	0.0759823	0.0333333	NC_037129.1	13428618	13428640	-	exon:XM_024397345.1/XM_024397344.1/XM_024397343.1/XM_024397347.1/XM_024397346.1
122rev	TCACTTGAGCAAATTGCTGCTGG	TGACTTGTGCAACTTGCTGAGGG	.*.....*....*......*	4	0.269912	0.0313828	NC_037103.1	14482162	14482184	-	intergenic:XM_024426015.1/XM_024426002.1/XM_024425999.1/XM_024426006.1/XM_024426005.1/XM_024426010.1/XM_024426008.1/XM_024426004.1/XM_024426001.1/XM_024426013.1/XM_024426012.1/XM_024426011.1/XM_024426009.1/XM_024426007.1-LOC112255171
122rev	TCACTTGAGCAAATTGCTGCTGG	TGACTTGTGCAACTTGCTGAGGG	.*.....*....*......*	4	0.269912	0.0313828	NC_037110.1	13282790	13282812	+	intergenic:XR_002955958.1-XM_024444218.1/XM_024444207.1/XM_024444210.1/XM_024444209.1/XM_024444204.1/XM_024444214.1/XM_024444212.1/XM_024444208.1/XM_024444206.1/XM_024444216.1/XM_024444211.1/XM_024444215.1/XM_024444213.1/XM_024444217.1
122rev	TCACTTGAGCAAATTGCTGCTGG	TCACTTGAGCCCGTTGCTCCCGG	..........***.....*.	4	0.0454354	0.0307741	NW_020128832.1	1065401	1065423	-	intergenic:XR_002950873.1-XR_002950874.1
122rev	TCACTTGAGCAAATTGCTGCTGG	TCACTTGAGCCCGTTGCTCCCGG	..........***.....*.	4	0.0454354	0.0307741	NW_020128832.1	1065474	1065496	-	intergenic:XR_002950873.1-XR_002950874.1
122rev	TCACTTGAGCAAATTGCTGCTGG	TCACTTGAGCCCGTTGCTCCCGG	..........***.....*.	4	0.0454354	0.0307741	NW_020128832.1	1040409	1040431	+	intergenic:XR_002950873.1-XR_002950874.1
122rev	TCACTTGAGCAAATTGCTGCTGG	TCACTTGAGCCCGTTGCTCCCGG	..........***.....*.	4	0.0454354	0.0307741	NW_020128832.1	1040336	1040358	+	intergenic:XR_002950873.1-XR_002950874.1
122rev	TCACTTGAGCAAATTGCTGCTGG	TACCTTGAGCAACTTGTTGCTGG	.**.........*...*...	4	0.232606	0.030622	NW_020142516.1	84064	84086	-	exon:XM_024414207.1/XM_024414206.1/XM_024414205.1/XM_024414204.1/XM_024414203.1/XM_024414202.1/XM_024414201.1/XM_024414200.1/XM_024414199.1/XM_024414198.1/XM_024414197.1
122rev	TCACTTGAGCAAATTGCTGCTGG	TCACTTGACATACTTGCTGCAGG	........***.*.......	4	0.157724	0.0302294	NC_037107.1	37186939	37186961	+	exon:XM_024437904.1
122rev	TCACTTGAGCAAATTGCTGCTGG	CCAGTTGAGCTACTTGCTGCAGG	*..*......*.*.......	4	0.322857	0.0277617	NC_037100.1	41019553	41019575	-	intron:XM_024418090.1
122rev	TCACTTGAGCAAATTGCTGCTGG	TCACTACAGCAAATAGCTGGAGG	.....**.......*....*	4	0.069415	0.0202915	NW_020142715.1	321429	321451	-	intergenic:XM_024416706.1/XM_024416705.1/XM_024416704.1/XM_024416703.1/XM_024416702.1/XM_024416701.1/XM_024416700.1/XM_024416699.1/XM_024416698.1/XM_024416697.1/XM_024416695.1/XM_024416694.1/XM_024416693.1/XM_024416692.1/XM_024416691.1-LOC112247886
122rev	TCACTTGAGCAAATTGCTGCTGG	TCCCTTGAGCCTATTGCTGTAGG	..*.......**.......*	4	0.177764	0.0171429	NC_037102.1	43866868	43866890	+	intergenic:LOC112253495-XM_024425372.1
122rev	TCACTTGAGCAAATTGCTGCTGG	TCACCTGTGCAAGTTGCTGGTGG	....*..*....*......*	4	0.255517	0.0164414	NC_037101.1	33337097	33337119	+	exon:XM_024420549.1/XM_024420547.1/XM_024420546.1/XM_024420545.1/XM_024420544.1/XM_024420543.1
122rev	TCACTTGAGCAAATTGCTGCTGG	TGACTGGAGCAAAATGGTGCTGG	.*...*.......*..*...	4	0.0549509	0.0144754	NC_037130.1	15755388	15755410	+	intergenic:XM_024398855.1/XM_024398851.1/XM_024398852.1/XM_024398856.1/XM_024398854.1-XR_002950590.1/XR_002950591.1
122rev	TCACTTGAGCAAATTGCTGCTGG	TGACTGGAGCAAAATGGTGCTGG	.*...*.......*..*...	4	0.0549509	0.0144754	NC_037130.1	15746991	15747013	+	intron:XM_024398857.1
122rev	TCACTTGAGCAAATTGCTGCTGG	TCACTTAAGCAAGCTGGTGCTGG	......*.....**..*...	4	0.0216937	0.0109609	NC_037114.1	36263213	36263235	-	intergenic:XM_024378718.1-LOC112218124
122rev	TCACTTGAGCAAATTGCTGCTGG	TCACTTGAGCCCCTTGCTCCCGG	..........***.....*.	4	0.0454354	0.00993409	NW_020128832.1	1065328	1065350	-	intergenic:XR_002950873.1-XR_002950874.1
122rev	TCACTTGAGCAAATTGCTGCTGG	TCACTTGAGCCCCTTGCTCCCGG	..........***.....*.	4	0.0454354	0.00993409	NW_020128832.1	1040482	1040504	+	intergenic:XR_002950873.1-XR_002950874.1
122rev	TCACTTGAGCAAATTGCTGCTGG	GCAGTTGAGGAAATGGCTGCAGG	*..*.....*....*.....	4	0.371023	0.00929952	NW_020142510.1	8902891	8902913	-	intergenic:XR_002952727.1/XR_002952726.1-XM_024413464.1
122rev	TCACTTGAGCAAATTGCTGCTGG	GCAGTTGAGGAAATGGCTGCAGG	*..*.....*....*.....	4	0.371023	0.00929952	NC_037101.1	37724543	37724565	-	intergenic:XR_002953531.1/XR_002953530.1-XM_024420691.1
122rev	TCACTTGAGCAAATTGCTGCTGG	TCCCTTAAGCAAACTGGTGCTGG	..*...*......*..*...	4	0.0580699	0.00720288	NC_037116.1	6393008	6393030	+	intron:XM_024381394.1
122rev	TCACTTGAGCAAATTGCTGCTGG	TCACTTGAGCAAATGGAACCAGG	..............*.***.	4	0.00831293	0.00697318	NC_037117.1	18214260	18214282	-	intron:XM_024383118.1
122rev	TCACTTGAGCAAATTGCTGCTGG	TCACTTCAGCACATGGCCGCGGG	......*....*..*..*..	4	0.0252541	0.00387688	NC_037108.1	14998023	14998045	+	intergenic:LOC112262700-XM_024438399.1
122rev	TCACTTGAGCAAATTGCTGCTGG	GCACTAGAGCAACTTCCTGCTGG	*....*......*..*....	4	0.0637628	0	NC_037117.1	6129255	6129277	-	intron:XM_024382642.1
122rev	TCACTTGAGCAAATTGCTGCTGG	TCAAATGAGCAATGTGCTGCAGG	...**.......**......	4	0.0824998	0	NC_037099.1	73144312	73144334	-	intergenic:LOC112224699-LOC112246226
122rev	TCACTTGAGCAAATTGCTGCTGG	GGACTTGAGCAAGTTTCTGCGGG	**..........*..*....	4	0.105393	0	NC_037098.1	34265208	34265230	+	intron:XM_024378343.1
122rev	TCACTTGAGCAAATTGCTGCTGG	ACTCTTGAGCAAAGTGCTCCAGG	*.*..........*....*.	4	0.0774014	0	NC_037130.1	1087443	1087465	+	intron:XM_024398390.1/XM_024398389.1/XM_024398388.1
122rev	TCACTTGAGCAAATTGCTGCTGG	TCATTTGAGAAAATCCCTGCTGG	...*.....*....**....	4	0.063816	0	NC_037129.1	9064189	9064211	-	intron:XM_024397223.1
122rev	TCACTTGAGCAAATTGCTGCTGG	TCACGAGACCAAAGTGCTGCTGG	....**..*....*......	4	0.0788022	0	NC_037122.1	15179791	15179813	-	exon:XM_024389020.1
122rev	TCACTTGAGCAAATTGCTGCTGG	TTTCTTGAGCAAAGTGCTCCAGG	.**..........*....*.	4	0.0732734	0	NW_020128834.1	3485348	3485370	-	intron:XM_024402487.1/XM_024402486.1/XM_024402485.1
122rev	TCACTTGAGCAAATTGCTGCTGG	TCACTTGACCACATGCCTGCTGG	........*..*..**....	4	0.018914	0	NC_037099.1	37900602	37900624	+	intergenic:XM_024402806.1-XM_024402836.1/XM_024402828.1
122rev	TCACTTGAGCAAATTGCTGCTGG	TTTCTTGAGCAAAGTGCTCCAGG	.**..........*....*.	4	0.0732734	0	NC_037107.1	12001098	12001120	+	intron:XM_024436778.1/XM_024436777.1/XM_024436776.1
122rev	TCACTTGAGCAAATTGCTGCTGG	TCACGAGACCAAAGTGCTGCTGG	....**..*....*......	4	0.0788022	0	NC_037099.1	49319543	49319565	-	exon:XM_024405409.1
122rev	TCACTTGAGCAAATTGCTGCTGG	GCGCTTGAGCAAGTTGCTGCGGG	*.*.........*.......	3	1.13459	0.381222	NW_020142502.1	1468138	1468160	-	intergenic:XM_024412868.1/XM_024412867.1-XR_002952663.1
122rev	TCACTTGAGCAAATTGCTGCTGG	TTGCTTGAGCAAGTTGCTGCAGG	.**.........*.......	3	1.07408	0.362319	NC_037105.1	26279797	26279819	-	intron:XM_024431599.1
122rev	TCACTTGAGCAAATTGCTGCTGG	CCGCTTGAGCAACTTGCTGCGGG	*.*.........*.......	3	1.13459	0.110276	NC_037119.1	6563004	6563026	-	intron:LOC112222529
122rev	TCACTTGAGCAAATTGCTGCTGG	TCACTTGAGCAAAATGTTGTTGG	.............*..*..*	3	0.0608438	0.0866667	NC_037097.1	31319856	31319878	+	intergenic:LOC112249900-XM_024419685.1
122rev	TCACTTGAGCAAATTGCTGCTGG	TCATTTGAGCAACCTGCTGCAGG	...*........**......	3	0.162311	0.0481203	NC_037115.1	47787164	47787186	-	intergenic:XM_024380361.1-XM_024380115.1
122rev	TCACTTGAGCAAATTGCTGCTGG	TCACTGGAGCAAACTTCTGCAGG	.....*.......*.*....	3	0.0436435	0	NC_037126.1	9371932	9371954	+	intron:XM_024393598.1/XM_024393597.1/XM_024393596.1/XM_024393595.1/XM_024393594.1/XM_024393593.1
158forw	CAAGTGAGCTCTTAGTCGCTAGG	CAAATCAGCTCTTAACCGCTAGG	...*.*........**....	4	0.0419204	0.385027	NC_037101.1	48353666	48353688	+	intergenic:XM_024420926.1-XM_024420925.1
158forw	CAAGTGAGCTCTTAGTCGCTAGG	CAGGTCAGCTCCTAGTCTCTGGG	..*..*.....*.....*..	4	0.0910806	0.263158	NC_037107.1	23658681	23658703	-	intergenic:XM_024437112.1-XM_024437113.1
158forw	CAAGTGAGCTCTTAGTCGCTAGG	CAAGGAAGCTCTTTGTCTCTCGG	....**.......*...*..	4	0.0265585	0.227556	NC_037106.1	10051377	10051399	-	intergenic:XM_024434679.1-XM_024434681.1/XM_024434680.1
158forw	CAAGTGAGCTCTTAGTCGCTAGG	CAAGTCAGCTCCTAGTAGCAGGG	.....*.....*....*..*	4	0.071833	0.169557	NC_037127.1	26505313	26505335	-	intron:XM_024395814.1/XM_024395813.1
158forw	CAAGTGAGCTCTTAGTCGCTAGG	CAAGTCAGCTCCTAGTAGCAGGG	.....*.....*....*..*	4	0.071833	0.169557	NW_020128813.1	6794631	6794653	+	intron:XM_024400899.1/XM_024400898.1
158forw	CAAGTGAGCTCTTAGTCGCTAGG	CAGGGGAGCTCTCAGTCCCTTGG	..*.*.......*....*..	4	0.118418	0.147034	NC_037101.1	33433452	33433474	+	intergenic:XM_024422499.1/XM_024420551.1/XM_024420550.1-XM_024420551.1/XM_024420550.1
158forw	CAAGTGAGCTCTTAGTCGCTAGG	CCAGTGACCTTTTAATCGCTAGG	.*.....*..*...*.....	4	0.223581	0.140023	NC_037103.1	78269757	78269779	+	intron:XM_024428352.1
158forw	CAAGTGAGCTCTTAGTCGCTAGG	CAAATCAGCTGTAAGTCGCTTGG	...*.*....*.*.......	4	0.185915	0.106206	NC_037125.1	28594169	28594191	-	intergenic:XM_024393148.1-XR_002949961.1
158forw	CAAGTGAGCTCTTAGTCGCTAGG	CAAGCGAGCACTTAATCGGTGGG	....*....*....*...*.	4	0.116872	0.10084	NC_037112.1	41451128	41451150	+	intergenic:XM_024375359.1/XM_024375358.1/XM_024375357.1-XM_024375360.1
158forw	CAAGTGAGCTCTTAGTCGCTAGG	CAAGCGAGCACTTAATCGGTGGG	....*....*....*...*.	4	0.116872	0.10084	NW_020128812.1	2166054	2166076	-	intergenic:XM_024400436.1-XM_024400440.1/XM_024400439.1/XM_024400437.1
158forw	CAAGTGAGCTCTTAGTCGCTAGG	GAAGTGAGATCTGAGTCCCTGGG	*.......*...*....*..	4	0.0733805	0.0972185	NC_037126.1	7055161	7055183	-	intergenic:XM_024393531.1-XM_024393534.1/XM_024393533.1/XM_024393532.1
158forw	CAAGTGAGCTCTTAGTCGCTAGG	CAAATGTGCTTTTAGTCACTAGG	...*..*...*......*..	4	0.11168	0.0838757	NC_037103.1	39290866	39290888	-	intergenic:XM_024426632.1/XM_024426631.1-LOC112255451
158forw	CAAGTGAGCTCTTAGTCGCTAGG	CAAATGTGCTTTTAGTCACTAGG	...*..*...*......*..	4	0.11168	0.0838757	NC_037103.1	37017662	37017684	-	intergenic:XM_024426562.1/XM_024426561.1-LOC112255447
158forw	CAAGTGAGCTCTTAGTCGCTAGG	CAATTAAGCTGTAAGTCGCTTGG	...*.*....*.*.......	4	0.185915	0.0629371	NC_037122.1	2203804	2203826	-	intergenic:XM_024388638.1-XR_002949530.1
158forw	CAAGTGAGCTCTTAGTCGCTAGG	CAAATGGGCTCTTATTCACTTGG	...*..*.......*..*..	4	0.0539285	0.0628313	NC_037103.1	11130766	11130788	-	intergenic:XM_024425876.1/XM_024425877.1-XM_024425877.1/XM_024425876.1
158forw	CAAGTGAGCTCTTAGTCGCTAGG	CAAGGGAGGTTTTAGTAGCTTGG	....*...*.*.....*...	4	0.196246	0.0568889	NC_037128.1	373745	373767	-	intron:XM_024396285.1
158forw	CAAGTGAGCTCTTAGTCGCTAGG	CAAGACAGCTCTTTCTCGCTGGG	....**.......**.....	4	0.0345646	0.0495868	NC_037124.1	2027692	2027714	+	intergenic:XM_024390903.1/XM_024390901.1/XM_024390899.1-XM_024390904.1
158forw	CAAGTGAGCTCTTAGTCGCTAGG	CAAGTGTCCTGTTAGTCACTCGG	......**..*......*..	4	0.106298	0.0465976	NC_037107.1	8243430	8243452	+	intron:XM_024436682.1
158forw	CAAGTGAGCTCTTAGTCGCTAGG	CAAGTGACCCCCTATTCGCTAGG	.......*.*.*..*.....	4	0.165758	0.0444187	NC_037122.1	37923582	37923604	+	intergenic:XM_024389697.1/XM_024389696.1/XM_024389695.1-XM_024389698.1/XM_024389699.1
158forw	CAAGTGAGCTCTTAGTCGCTAGG	CAATTCAGCTGTAAGTCGCTTGG	...*.*....*.*.......	4	0.185915	0.0429116	NW_020128804.1	3802872	3802894	-	intergenic:XM_024399203.1-XM_024399204.1
158forw	CAAGTGAGCTCTTAGTCGCTAGG	CAATTCAGCTGTAAGTCGCTTGG	...*.*....*.*.......	4	0.185915	0.0429116	NC_037108.1	53717839	53717861	+	intergenic:XM_024439759.1-XM_024439765.1
158forw	CAAGTGAGCTCTTAGTCGCTAGG	GAAGTGGGCTCCTAGTGGCTGGG	*.....*....*....*...	4	0.204842	0.0359165	NC_037130.1	5076067	5076089	+	intergenic:XM_024398505.1/XM_024398504.1-XM_024398510.1
158forw	CAAGTGAGCTCTTAGTCGCTAGG	CAGGTGAGCTCTCAGTCCGTTGG	..*.........*....**.	4	0.0373015	0.0287176	NC_037102.1	2842893	2842915	+	intergenic:XR_002953963.1-XM_024422817.1
158forw	CAAGTGAGCTCTTAGTCGCTAGG	CAAGTGAGCTATGAGTGACTGGG	..........*.*...**..	4	0.0221225	0.00796774	NW_020142656.1	304070	304092	-	intergenic:XM_024416447.1-XR_002953100.1
158forw	CAAGTGAGCTCTTAGTCGCTAGG	GAAGTGAGCTCCTAGTGGCCGGG	*..........*....*..*	4	0.13211	0.00462561	NC_037106.1	7387115	7387137	-	intergenic:XM_024434597.1-XR_002955085.1
158forw	CAAGTGAGCTCTTAGTCGCTAGG	CAACTGTGCTCTTATTGGCTTGG	...*..*.......*.*...	4	0.105931	0.00194637	NW_020128810.1	467531	467553	-	intergenic:XR_002950706.1/XR_002950705.1/XR_002950703.1/XR_002950702.1/XR_002950707.1/XR_002950704.1-XM_024400121.1
158forw	CAAGTGAGCTCTTAGTCGCTAGG	CAACTGTGCTCTTATTGGCTTGG	...*..*.......*.*...	4	0.105931	0.00194637	NC_037121.1	458472	458494	-	intergenic:XR_002949422.1/XR_002949421.1/XR_002949419.1/XR_002949418.1/XR_002949423.1/XR_002949420.1-XM_024387337.1
158forw	CAAGTGAGCTCTTAGTCGCTAGG	GAATTGAGCTCTTAATCGCTTGG	*..*..........*.....	3	0.844444	0.312485	NC_037105.1	70815728	70815750	-	intron:XM_024432790.1/XM_024432789.1
158forw	CAAGTGAGCTCTTAGTCGCTAGG	CAAGTGAGCTCCTACTCGGTTGG	...........*..*...*.	3	0.105644	0.0322967	NC_037111.1	31391458	31391480	+	intergenic:XM_024373743.1/XM_024373742.1-XM_024373744.1
158forw	CAAGTGAGCTCTTAGTCGCTAGG	CATGTGAGGTCTTAGTGGCTGGG	..*.....*.......*...	3	0.730828	0.0257044	NC_037102.1	60248947	60248969	+	intergenic:XM_024424715.1-XM_024425472.1
164rev	TTTCAGGAGAAGAAGAGGAAAGG	TTTCAAGAGAAAAAAAAGAATGG	.....*.....*..*.*...	4	0.0439412	0.819869	NC_037122.1	27801882	27801904	+	intergenic:XM_024389460.1-XM_024389461.1
164rev	TTTCAGGAGAAGAAGAGGAAAGG	GATCAGAAGAAGAAGAAGAAAGG	**....*.........*...	4	0.416345	0.755407	NC_037097.1	44352036	44352058	+	intergenic:LOC112260570-XM_024422996.1/XM_024422987.1
164rev	TTTCAGGAGAAGAAGAGGAAAGG	TTTCAGAGGAAAAAGAAGAAAGG	......**...*....*...	4	0.185098	0.638815	NC_037105.1	82992058	82992080	-	intergenic:XM_024433960.1-XM_024433442.1/XM_024433441.1
164rev	TTTCAGGAGAAGAAGAGGAAAGG	AATTAGGAGAAGAAGAAGAAAGG	**.*............*...	4	0.609583	0.631795	NC_037108.1	39190983	39191005	-	intergenic:XM_024439457.1-XM_024439455.1
164rev	TTTCAGGAGAAGAAGAGGAAAGG	AATTAGGAGAAGAAGAAGAAAGG	**.*............*...	4	0.609583	0.631795	NC_037109.1	14983312	14983334	-	intergenic:XM_024441236.1-XM_024441233.1
164rev	TTTCAGGAGAAGAAGAGGAAAGG	TTACAGAAGAAGAAAAAGAATGG	..*...*.......*.*...	4	0.104448	0.627451	NC_037124.1	23268074	23268096	-	intergenic:XM_024391661.1-XM_024391665.1/XM_024391664.1/XM_024391663.1/XM_024391662.1
164rev	TTTCAGGAGAAGAAGAGGAAAGG	GATCAGAGGAAGAAGAGGAAGGG	**....**............	4	0.932256	0.593534	NC_037109.1	71055028	71055050	+	intergenic:XM_024443275.1-XR_002955872.1
164rev	TTTCAGGAGAAGAAGAGGAAAGG	TCACAGAAGAAGAAGAAGAAGGG	.**...*.........*...	4	0.410517	0.571429	NC_037122.1	14621937	14621959	+	intron:XM_024388987.1/XM_024388986.1/XM_024388984.1/XM_024388983.1/XM_024388982.1/XM_024388981.1/XM_024388980.1
164rev	TTTCAGGAGAAGAAGAGGAAAGG	CTACAGAAGAAGAAGAAGAATGG	*.*...*.........*...	4	0.410517	0.571429	NC_037108.1	16673733	16673755	+	exon:XM_024438452.1
164rev	TTTCAGGAGAAGAAGAGGAAAGG	CTTTAGGAGTAGAAGAAGAATGG	*..*.....*......*...	4	0.561426	0.564706	NC_037105.1	9999487	9999509	+	intergenic:XM_024430943.1/XM_024430942.1-XM_024434024.1
164rev	TTTCAGGAGAAGAAGAGGAAAGG	TAACAGAAGAAGAAGAAGAAAGG	.**...*.........*...	4	0.410517	0.564103	NW_020129427.1	147315	147337	+	intergenic:XM_024406680.1-Gap
164rev	TTTCAGGAGAAGAAGAGGAAAGG	TAACAGAAGAAAAAGAGGAATGG	.**...*....*........	4	0.474044	0.564103	NW_020129035.1	45948	45970	+	intergenic:Gap-XM_024405065.1
164rev	TTTCAGGAGAAGAAGAGGAAAGG	TTAAAGAAGAAGAAGAAGAAGGG	..**..*.........*...	4	0.389731	0.561404	NC_037109.1	28783583	28783605	+	intergenic:XM_024443532.1-LOC112266038
164rev	TTTCAGGAGAAGAAGAGGAAAGG	GAACAGGAGAAGAAGAAGAAGGG	***.............*...	4	0.601049	0.539576	NW_020129733.1	15813	15835	-	intergenic:Gap-XM_024407378.1
164rev	TTTCAGGAGAAGAAGAGGAAAGG	CTTTAAGAGAAGAAGAGGAGGGG	*..*.*.............*	4	0.421956	0.52437	NC_037113.1	10654666	10654688	+	intergenic:XM_024376982.1/XM_024376978.1/XM_024376975.1/XM_024376984.1/XM_024376986.1/XM_024376983.1/XM_024376980.1/XR_002948407.1/XR_002948406.1/XM_024376985.1/XM_024376981.1-XM_024376977.1
164rev	TTTCAGGAGAAGAAGAGGAAAGG	CATCGGAAGAAGAAGAGGAATGG	**..*.*.............	4	0.932256	0.522198	NC_037097.1	61376089	61376111	+	intergenic:XM_024427332.1-XM_024427350.1
164rev	TTTCAGGAGAAGAAGAGGAAAGG	TGTAAGGAGAAGAAGAAGAGCGG	.*.*............*..*	4	0.268517	0.504867	NW_020128804.1	12275891	12275913	-	exon:id766487
164rev	TTTCAGGAGAAGAAGAGGAAAGG	TGTAAGGAGAAGAAGAAGAGCGG	.*.*............*..*	4	0.268517	0.504867	NC_037109.1	23724832	23724854	+	exon:id401994
164rev	TTTCAGGAGAAGAAGAGGAAAGG	CTTCAAGAGAAGAAGAAGATGGG	*....*..........*..*	4	0.162453	0.48	NW_020129856.1	99613	99635	-	intergenic:XM_024407632.1-XM_024407634.1
164rev	TTTCAGGAGAAGAAGAGGAAAGG	CCTCAGAAGAGGAAGAGGAAAGG	**....*...*.........	4	0.542337	0.477551	NC_037111.1	34811266	34811288	+	intergenic:XM_024373845.1/XM_024373846.1-XM_024373847.1
164rev	TTTCAGGAGAAGAAGAGGAAAGG	CCTCAGAAGAGGAAGAGGAAAGG	**....*...*.........	4	0.542337	0.477551	NW_020129322.1	80008	80030	+	intron:XM_024406334.1
164rev	TTTCAGGAGAAGAAGAGGAAAGG	CCTCAGAAGAGGAAGAGGAAAGG	**....*...*.........	4	0.542337	0.477551	NW_020129508.1	205538	205560	-	intron:XM_024406901.1
164rev	TTTCAGGAGAAGAAGAGGAAAGG	CATCAGAAGAGGAAGAGGAAAGG	**....*...*.........	4	0.542337	0.471429	NC_037117.1	4221052	4221074	-	intergenic:LOC112220468-XM_024382593.1
164rev	TTTCAGGAGAAGAAGAGGAAAGG	TGTTAAGAGAAGAAGAGAAAAGG	.*.*.*...........*..	4	0.187752	0.465231	NC_037097.1	43486150	43486172	+	intergenic:XM_024422285.1-XM_024422229.1
164rev	TTTCAGGAGAAGAAGAGGAAAGG	GTTAAGAAGGAGAAGAGGAATGG	*..*..*..*..........	4	0.899986	0.447496	NC_037116.1	16241427	16241449	-	intron:XM_024381418.1
164rev	TTTCAGGAGAAGAAGAGGAAAGG	GTTCCAGAGAAGAAGAAGAAAGG	*...**..........*...	4	0.368798	0.446377	NC_037118.1	1319476	1319498	-	intergenic:XR_002949043.1-XR_002949043.1/XM_024383709.1/XM_024383708.1/XM_024383707.1/XM_024383706.1
164rev	TTTCAGGAGAAGAAGAGGAAAGG	GAACAGGAGAAGAAGAGGAGAGG	***................*	4	0.687683	0.44209	NW_020128862.1	409622	409644	-	intergenic:XM_024403479.1/XM_024403478.1-XM_024403480.1
164rev	TTTCAGGAGAAGAAGAGGAAAGG	CATCAGGAGAAGGAGAAGAAAGG	**..........*...*...	4	0.235909	0.441472	NC_037102.1	21245048	21245070	-	intron:XM_024425428.1
164rev	TTTCAGGAGAAGAAGAGGAAAGG	TTTCAGGACAAAAAAAAGAAAGG	........*..*..*.*...	4	0.0423366	0.441468	NC_037116.1	33876716	33876738	+	intron:XM_024380672.1
164rev	TTTCAGGAGAAGAAGAGGAAAGG	GGACAGGAGAAGAAGAGGAGAGG	***................*	4	0.687683	0.438875	NC_037110.1	35564486	35564508	-	intron:LOC112267044
164rev	TTTCAGGAGAAGAAGAGGAAAGG	TTTCAGGATAAAAAAAAGAAAGG	........*..*..*.*...	4	0.0423366	0.437264	NC_037113.1	8876186	8876208	+	intergenic:XM_024376892.1/XM_024376891.1/XM_024376893.1-XM_024376895.1
164rev	TTTCAGGAGAAGAAGAGGAAAGG	TTTCAGGATAAAAAAAAGAATGG	........*..*..*.*...	4	0.0423366	0.437264	NC_037130.1	1406264	1406286	-	intergenic:XM_024398407.1/XM_024398406.1-XM_024398409.1/XM_024398408.1
164rev	TTTCAGGAGAAGAAGAGGAAAGG	TTTAAAGAGAAGGAGAGGAGGGG	...*.*......*......*	4	0.154588	0.419976	NC_037117.1	12005261	12005283	-	intron:XM_024382909.1
164rev	TTTCAGGAGAAGAAGAGGAAAGG	CTACAGGGGAAGAAGAAGAAGGG	*.*....*........*...	4	0.601049	0.419048	NC_037099.1	18304595	18304617	-	intergenic:XM_024396890.1/XM_024396883.1/XM_024396876.1/XM_024396868.1-LOC112230623
164rev	TTTCAGGAGAAGAAGAGGAAAGG	CTACAGGGGAAGAAGAAGAAGGG	*.*....*........*...	4	0.601049	0.419048	NW_020129251.1	330153	330175	+	intergenic:LOC112237458-XM_024406054.1/XM_024406053.1/XM_024406052.1/XM_024406050.1
164rev	TTTCAGGAGAAGAAGAGGAAAGG	TTTCAAAACAAGAAGAGGAGTGG	.....**.*..........*	4	0.158256	0.411765	NC_037110.1	28948421	28948443	-	intron:XM_024444838.1/XM_024444837.1/XM_024444836.1/XM_024444835.1
164rev	TTTCAGGAGAAGAAGAGGAAAGG	GTTACGAAGAAGAAGAGGAAGGG	*..**.*.............	4	0.932256	0.402746	NC_037112.1	69438616	69438638	-	intergenic:XM_024376440.1-XM_024376449.1/XM_024376448.1/XM_024376447.1/XM_024376446.1/XM_024376444.1/XM_024376442.1/XM_024376441.1
164rev	TTTCAGGAGAAGAAGAGGAAAGG	GTTAAGGAGAAGGAGAGGAGGGG	*..*........*......*	4	0.269912	0.401716	NW_020129155.1	468	490	+	intergenic:Gap-LOC112237088
164rev	TTTCAGGAGAAGAAGAGGAAAGG	ATTTGGGAGAAGAAGAGAAATGG	*..**............*..	4	0.310333	0.398769	NW_020129102.1	20329	20351	-	intergenic:Gap-XR_002951278.1
164rev	TTTCAGGAGAAGAAGAGGAAAGG	TTTTAGAAGAGGAAGAGGAGCGG	...*..*...*........*	4	0.250278	0.397647	NC_037112.1	53379408	53379430	-	intron:LOC112215208
164rev	TTTCAGGAGAAGAAGAGGAAAGG	TTTTAGAAGAGGAAGAGGAGCGG	...*..*...*........*	4	0.250278	0.397647	NW_020142747.1	256989	257011	+	intron:LOC112248044
164rev	TTTCAGGAGAAGAAGAGGAAAGG	AATAAGGAGGAGAAGAGGAATGG	**.*.....*..........	4	1.3177	0.395861	NC_037106.1	7003570	7003592	-	intron:XM_024434589.1
164rev	TTTCAGGAGAAGAAGAGGAAAGG	CTACAGAAAAAGAAGAGGAATGG	*.*...*.*...........	4	0.561634	0.393586	NC_037101.1	32569328	32569350	-	intergenic:XR_002953704.1-XR_002953522.1
164rev	TTTCAGGAGAAGAAGAGGAAAGG	TTGAAGAAGAAGAAGAAGAAGGG	..**..*.........*...	4	0.389731	0.392982	NC_037122.1	16641278	16641300	-	intergenic:XM_024389038.1/XM_024389039.1-XM_024388576.1
164rev	TTTCAGGAGAAGAAGAGGAAAGG	ATAAAGGAGAGGAAGAGGAAAGG	*.**......*.........	4	0.782934	0.390977	NC_037102.1	1836910	1836932	+	intergenic:XM_024422815.1-XM_024425243.1
164rev	TTTCAGGAGAAGAAGAGGAAAGG	CATCAGAAGAAGATGAGGAATGG	**....*......*......	4	0.152973	0.386813	NC_037109.1	36765257	36765279	-	intergenic:XM_024442010.1-LOC112266221
164rev	TTTCAGGAGAAGAAGAGGAAAGG	GATGAGGAGAAGAAAAGGAAAGG	**.*..........*.....	4	0.402848	0.380877	NC_037125.1	6902864	6902886	-	intergenic:XM_024392457.1-XM_024392327.1
164rev	TTTCAGGAGAAGAAGAGGAAAGG	ATTCAGGGGAGGAAGAGGAGAGG	*......*..*........*	4	0.387083	0.36451	NC_037099.1	10209371	10209393	+	intergenic:XM_024392978.1-XM_024412226.1
164rev	TTTCAGGAGAAGAAGAGGAAAGG	TTTCAACAGAAGAAGAGAAGTGG	.....**..........*.*	4	0.0507662	0.363971	NW_020142532.1	1531910	1531932	-	intergenic:XR_002952898.1-LOC112246296
164rev	TTTCAGGAGAAGAAGAGGAAAGG	TTTCAACAGAAGAAGAGAAGTGG	.....**..........*.*	4	0.0507662	0.363971	NC_037103.1	81024167	81024189	+	intergenic:LOC112255363-XR_002954269.1
164rev	TTTCAGGAGAAGAAGAGGAAAGG	TTTCAAAAGGAGGAGAGGAAAGG	.....**..*..*.......	4	0.20103	0.362319	NW_020130118.1	3066	3088	-	intergenic:Gap-XM_024408087.1
164rev	TTTCAGGAGAAGAAGAGGAAAGG	TTTTGTGAGAAGAAAAGGAAAGG	...***........*.....	4	0.231977	0.361412	NC_037100.1	60838510	60838532	-	intergenic:XM_024418744.1-XM_024418744.1/XM_024418743.1
164rev	TTTCAGGAGAAGAAGAGGAAAGG	ATCAAGAAGAAGAAGAGGAATGG	*.**..*.............	4	0.919204	0.360902	NC_037117.1	30165912	30165934	-	exon:XM_024382421.1
164rev	TTTCAGGAGAAGAAGAGGAAAGG	ATCAAGAAGAAGAAGAGGAATGG	*.**..*.............	4	0.919204	0.360902	NC_037097.1	14546601	14546623	-	exon:XM_024436052.1
164rev	TTTCAGGAGAAGAAGAGGAAAGG	TTTCAGGATAAGAAAAAGAGTGG	........*.....*.*..*	4	0.0376122	0.358262	NC_037127.1	1392157	1392179	-	intron:XM_024395031.1
164rev	TTTCAGGAGAAGAAGAGGAAAGG	CTTCAGCAAAAGAAAAGGAAAGG	*.....*.*.....*.....	4	0.168114	0.356543	NC_037116.1	6320728	6320750	-	intergenic:XM_024381597.1-XM_024381393.1
164rev	TTTCAGGAGAAGAAGAGGAAAGG	TGTAAGGAGAGGAAGAGGAGAGG	.*.*......*........*	4	0.387083	0.351604	NC_037115.1	21465397	21465419	+	intron:XM_024379243.1
164rev	TTTCAGGAGAAGAAGAGGAAAGG	ATTCAAGATAAGGAGAGGAAAGG	*....*..*...*.......	4	0.215037	0.347826	NW_020130308.1	58780	58802	+	intergenic:XM_024408396.1-XM_024408397.1
164rev	TTTCAGGAGAAGAAGAGGAAAGG	TCTCAGGAAAAGAAAAGTAAAGG	.*......*.....*..*..	4	0.0508165	0.345738	NC_037100.1	8737259	8737281	+	intron:XM_024415903.1/XM_024415895.1/XM_024415888.1
164rev	TTTCAGGAGAAGAAGAGGAAAGG	ATTCAGGATAAAAAGAGAAACGG	*.......*..*.....*..	4	0.0932899	0.344615	NC_037111.1	12288420	12288442	-	intergenic:XM_024373059.1/XM_024373058.1-XM_024373060.1
164rev	TTTCAGGAGAAGAAGAGGAAAGG	GGACAGGAGAAGAAGAGGATAGG	***................*	4	0.687683	0.344348	NC_037097.1	2353422	2353444	-	intergenic:XM_024440229.1-XR_002955547.1
164rev	TTTCAGGAGAAGAAGAGGAAAGG	CTTCAGATGAAGAAGAAGAATGG	*.....**........*...	4	0.416345	0.342857	NC_037101.1	84464398	84464420	-	intergenic:XR_002953736.1-XM_024422595.1
164rev	TTTCAGGAGAAGAAGAGGAAAGG	GTTGAGGAGAAGAAGAAGAGGGG	*..*............*..*	4	0.268517	0.341347	NC_037108.1	4816500	4816522	+	intron:XM_024438166.1
164rev	TTTCAGGAGAAGAAGAGGAAAGG	GTACAGGAGAAGGAGAGGAGAGG	*.*.........*......*	4	0.266133	0.340741	NW_020129064.1	10434	10456	-	intergenic:Gap-XR_002951250.1
164rev	TTTCAGGAGAAGAAGAGGAAAGG	TTTAAGACGAAGAAGAAGAAGGG	...*..**........*...	4	0.395265	0.336842	NC_037104.1	2112611	2112633	-	intergenic:XM_024430588.1-XM_024428703.1
164rev	TTTCAGGAGAAGAAGAGGAAAGG	TGACAGAAGGAGAAGAGGAAAGG	.**...*..*..........	4	0.846587	0.333333	NC_037102.1	73977277	73977299	+	intron:XM_024425501.1
164rev	TTTCAGGAGAAGAAGAGGAAAGG	TTACAGGAGAAAGAGAGGAGGGG	..*........**......*	4	0.123954	0.332481	NC_037108.1	20808892	20808914	-	intergenic:XM_024440571.1-XM_024438653.1/XM_024438651.1
164rev	TTTCAGGAGAAGAAGAGGAAAGG	TGTCAGGAATAGAAGAGAAATGG	.*......**.......*..	4	0.174634	0.329864	NC_037105.1	6408578	6408600	+	intergenic:XM_024430868.1-XM_024430870.1
164rev	TTTCAGGAGAAGAAGAGGAAAGG	TTTCAGGACAAAAAAAGAAAAGG	........*..*..*..*..	4	0.0225919	0.327463	NC_037106.1	28315832	28315854	-	intergenic:XM_024434211.1-XM_024435173.1
164rev	TTTCAGGAGAAGAAGAGGAAAGG	TTTCAGGACAAAAAAAGAAAAGG	........*..*..*..*..	4	0.0225919	0.327463	NW_020128813.1	4693482	4693504	-	intergenic:XM_024400751.1/XM_024400750.1/XM_024400749.1/XM_024400748.1-XM_024400750.1/XM_024400749.1/XM_024400748.1
164rev	TTTCAGGAGAAGAAGAGGAAAGG	TTTCAGGACAAAAAAAGAAAAGG	........*..*..*..*..	4	0.0225919	0.327463	NC_037127.1	28606462	28606484	+	intergenic:XM_024395960.1/XM_024395959.1/XM_024395958.1-XM_024395961.1/XM_024395960.1/XM_024395959.1/XM_024395958.1
164rev	TTTCAGGAGAAGAAGAGGAAAGG	TTTCAGGACAAAAAAAGAAACGG	........*..*..*..*..	4	0.0225919	0.327463	NC_037098.1	38118274	38118296	-	intron:XM_024438901.1
164rev	TTTCAGGAGAAGAAGAGGAAAGG	GTTAAGGAGAACAAGAGGAGAGG	*..*.......*.......*	4	0.343144	0.326099	NC_037104.1	17659598	17659620	+	intergenic:XM_024429140.1/XM_024429139.1-XM_024429145.1
164rev	TTTCAGGAGAAGAAGAGGAAAGG	TTTCAGGATAAGAAAAAAAATGG	........*.....*.**..	4	0.0176786	0.324344	NC_037099.1	4519872	4519894	+	intron:XM_024390361.1
164rev	TTTCAGGAGAAGAAGAGGAAAGG	TTTCAGGATAAAAAAAGAAATGG	........*..*..*..*..	4	0.0225919	0.324344	NC_037118.1	11760241	11760263	+	intergenic:XM_024384120.1-XM_024383554.1
164rev	TTTCAGGAGAAGAAGAGGAAAGG	TTTCAGGATAAAAAAAGAAACGG	........*..*..*..*..	4	0.0225919	0.324344	NW_020129111.1	55071	55093	+	intron:XM_024405437.1
164rev	TTTCAGGAGAAGAAGAGGAAAGG	TTTCAGGATAAAAAAAGAAATGG	........*..*..*..*..	4	0.0225919	0.324344	NC_037116.1	34042531	34042553	+	intron:XM_024380685.1/XM_024380684.1/XM_024380683.1/XM_024380682.1/XM_024380681.1/XM_024380680.1/XM_024380678.1/XM_024380677.1
164rev	TTTCAGGAGAAGAAGAGGAAAGG	TTTCAGGATAAAAAAAGAAATGG	........*..*..*..*..	4	0.0225919	0.324344	NC_037101.1	82776669	82776691	+	intron:XM_024422592.1
164rev	TTTCAGGAGAAGAAGAGGAAAGG	TTTCAGGATAAAAAAAGAAAAGG	........*..*..*..*..	4	0.0225919	0.324344	NC_037101.1	78359418	78359440	-	intron:XM_024422585.1
164rev	TTTCAGGAGAAGAAGAGGAAAGG	TTTCAGGATAAAAAAAGAAACGG	........*..*..*..*..	4	0.0225919	0.324344	NC_037101.1	81987501	81987523	+	intergenic:XR_002953653.1-XM_024422781.1
164rev	TTTCAGGAGAAGAAGAGGAAAGG	TTTCAGGATAAAAAAAGAAACGG	........*..*..*..*..	4	0.0225919	0.324344	NC_037111.1	21798556	21798578	+	intron:XM_024373351.1
164rev	TTTCAGGAGAAGAAGAGGAAAGG	TTTCAGGATAAAAAAAGAAACGG	........*..*..*..*..	4	0.0225919	0.324344	NW_020142491.1	140710	140732	+	intergenic:XM_024412284.1-XR_002952611.1
164rev	TTTCAGGAGAAGAAGAGGAAAGG	TTTCAGGATAAAAAAAGAAACGG	........*..*..*..*..	4	0.0225919	0.324344	NC_037101.1	70228412	70228434	-	intergenic:XM_024421937.1/XM_024421936.1-XM_024421936.1
164rev	TTTCAGGAGAAGAAGAGGAAAGG	TTTCAGGATAAAAAAAGAAACGG	........*..*..*..*..	4	0.0225919	0.324344	NC_037101.1	74141204	74141226	-	intergenic:XM_024422081.1/XM_024422080.1-XM_024422080.1
164rev	TTTCAGGAGAAGAAGAGGAAAGG	TTTCAGGATAAAAAAAGAAACGG	........*..*..*..*..	4	0.0225919	0.324344	NC_037101.1	31632641	31632663	+	intergenic:XM_024420460.1-XM_024422494.1
164rev	TTTCAGGAGAAGAAGAGGAAAGG	TTTCAGGATAAAAAAAGAAATGG	........*..*..*..*..	4	0.0225919	0.324344	NC_037110.1	27631937	27631959	+	intron:XM_024444755.1/XM_024444754.1
164rev	TTTCAGGAGAAGAAGAGGAAAGG	TTTCAGGATAAAAAAAGAAATGG	........*..*..*..*..	4	0.0225919	0.324344	NC_037102.1	38520520	38520542	+	intron:XM_024423980.1
164rev	TTTCAGGAGAAGAAGAGGAAAGG	TTTCAGGATAAAAAAAGAAATGG	........*..*..*..*..	4	0.0225919	0.324344	NC_037106.1	14327055	14327077	-	intergenic:XM_024434789.1-XM_024434792.1/XM_024434791.1/XM_024434790.1
164rev	TTTCAGGAGAAGAAGAGGAAAGG	TTTCAGGATAAAAAAAGAAAGGG	........*..*..*..*..	4	0.0225919	0.324344	NW_020128858.1	626229	626251	-	intron:XM_024403297.1
164rev	TTTCAGGAGAAGAAGAGGAAAGG	TTTCAGGATAAAAAAAGAAATGG	........*..*..*..*..	4	0.0225919	0.324344	NC_037102.1	23589547	23589569	-	intergenic:XM_024423535.1-XM_024423538.1/XM_024423536.1/XM_024423537.1/XM_024423539.1/XM_024423540.1/XM_024423541.1/XM_024423542.1/XM_024423543.1
164rev	TTTCAGGAGAAGAAGAGGAAAGG	TTTCAGGATAAAAAAAGAAATGG	........*..*..*..*..	4	0.0225919	0.324344	NC_037105.1	55251586	55251608	-	intergenic:XM_024432385.1-XM_024432384.1/XM_024432383.1
164rev	TTTCAGGAGAAGAAGAGGAAAGG	TTTCAGGATAAAAAAAGAAACGG	........*..*..*..*..	4	0.0225919	0.324344	NC_037107.1	43702208	43702230	+	intergenic:XM_024438018.1-XM_024437792.1/XM_024437791.1/XM_024437793.1
164rev	TTTCAGGAGAAGAAGAGGAAAGG	TTTCAGGATAAAAAAAGAAACGG	........*..*..*..*..	4	0.0225919	0.324344	NC_037100.1	21664840	21664862	-	intron:XM_024417321.1
164rev	TTTCAGGAGAAGAAGAGGAAAGG	TTTCAGGATAAAAAAAGAAATGG	........*..*..*..*..	4	0.0225919	0.324344	NC_037100.1	15212050	15212072	-	intergenic:XM_024417048.1/XM_024417046.1/XM_024417049.1/XM_024417047.1-XM_024417050.1/XR_002953200.1/XM_024417051.1
164rev	TTTCAGGAGAAGAAGAGGAAAGG	TTTCAGGATAAAAAAAGAAACGG	........*..*..*..*..	4	0.0225919	0.324344	NC_037121.1	26628568	26628590	+	intergenic:XM_024388465.1-XM_024388204.1/XM_024388206.1
164rev	TTTCAGGAGAAGAAGAGGAAAGG	TTTCAGGATAAAAAAAGAAACGG	........*..*..*..*..	4	0.0225919	0.324344	NC_037130.1	5991211	5991233	+	intergenic:XM_024398550.1/XM_024398549.1/XM_024398547.1-XM_024398551.1
164rev	TTTCAGGAGAAGAAGAGGAAAGG	TTTCAGGATAAAAAAAGAAATGG	........*..*..*..*..	4	0.0225919	0.324344	NC_037123.1	13636338	13636360	-	intergenic:XM_024390600.1-XM_024389950.1
164rev	TTTCAGGAGAAGAAGAGGAAAGG	TTTCAGGATAAAAAAAGAAACGG	........*..*..*..*..	4	0.0225919	0.324344	NC_037097.1	65547257	65547279	-	intergenic:XM_024423148.1-XM_024423273.1
164rev	TTTCAGGAGAAGAAGAGGAAAGG	TTTCAGGATAAAAAAAGAAATGG	........*..*..*..*..	4	0.0225919	0.324344	NC_037105.1	43025353	43025375	-	intergenic:XM_024432116.1-XM_024432115.1/XM_024432114.1
164rev	TTTCAGGAGAAGAAGAGGAAAGG	TTTCAGGATAAAAAAAGAAAAGG	........*..*..*..*..	4	0.0225919	0.324344	NC_037110.1	53432165	53432187	-	intron:XM_024445607.1
164rev	TTTCAGGAGAAGAAGAGGAAAGG	TTTCAGGATAAAAAAAGAAATGG	........*..*..*..*..	4	0.0225919	0.324344	NC_037100.1	23502870	23502892	-	intron:XM_024417419.1
164rev	TTTCAGGAGAAGAAGAGGAAAGG	TTTCAGGATAAAAAAAGAAACGG	........*..*..*..*..	4	0.0225919	0.324344	NC_037106.1	19475421	19475443	-	intergenic:LOC112260106-LOC112261019
164rev	TTTCAGGAGAAGAAGAGGAAAGG	TTTCAGGATAAAAAAAGAAACGG	........*..*..*..*..	4	0.0225919	0.324344	NC_037123.1	9528020	9528042	-	intergenic:XM_024390296.1-XM_024390295.1
164rev	TTTCAGGAGAAGAAGAGGAAAGG	TTTCAGGATAAAAAAAGAAAGGG	........*..*..*..*..	4	0.0225919	0.324344	NW_020128858.1	2053192	2053214	+	intron:XM_024403395.1
164rev	TTTCAGGAGAAGAAGAGGAAAGG	TTTCAGGATAAAAAAAGAAACGG	........*..*..*..*..	4	0.0225919	0.324344	NC_037097.1	83293283	83293305	+	intergenic:XM_024432454.1/XM_024432448.1/XM_024432439.1/XM_024432429.1/XM_024432420.1-XM_024436496.1
164rev	TTTCAGGAGAAGAAGAGGAAAGG	TTTCAGGATAAAAAAAGAAACGG	........*..*..*..*..	4	0.0225919	0.324344	NC_037106.1	28337289	28337311	+	intron:XM_024435173.1
164rev	TTTCAGGAGAAGAAGAGGAAAGG	TTTCAGGATAAAAAAAGAAACGG	........*..*..*..*..	4	0.0225919	0.324344	NC_037101.1	50948282	50948304	-	intergenic:XM_024421032.1/XM_024421033.1-XR_002953713.1
164rev	TTTCAGGAGAAGAAGAGGAAAGG	TTTCAGGATAAAAAAAGAAATGG	........*..*..*..*..	4	0.0225919	0.324344	NC_037122.1	1851506	1851528	-	intergenic:XM_024388638.1-XR_002949530.1
164rev	TTTCAGGAGAAGAAGAGGAAAGG	TTTCAGGATAAAAAAAGAAACGG	........*..*..*..*..	4	0.0225919	0.324344	NC_037130.1	6016174	6016196	+	intergenic:XM_024398563.1-XR_002950527.1
164rev	TTTCAGGAGAAGAAGAGGAAAGG	TTTCAGGATAAAAAAAGAAACGG	........*..*..*..*..	4	0.0225919	0.324344	NC_037111.1	21737074	21737096	-	intergenic:XM_024373349.1-rna38146
164rev	TTTCAGGAGAAGAAGAGGAAAGG	TTTCAGGATAAAAAAAGAAATGG	........*..*..*..*..	4	0.0225919	0.324344	NC_037100.1	10876292	10876314	-	intergenic:LOC112249440-XM_024416224.1/XR_002953073.1/XM_024416237.1
164rev	TTTCAGGAGAAGAAGAGGAAAGG	TTTCAGGATAAAAAAAGAAATGG	........*..*..*..*..	4	0.0225919	0.324344	NC_037105.1	37438548	37438570	-	intergenic:XM_024431981.1/XM_024431972.1/XM_024431979.1/XM_024431977.1/XM_024431975.1/XM_024431974.1/XM_024431973.1/XM_024431980.1/XM_024431978.1/XM_024431986.1/XM_024431988.1/XM_024431989.1/XM_024431982.1/XM_024431983.1/XM_024431985.1/XM_024431984.1-XM_024431990.1/XM_024431993.1/XM_024431992.1/XM_024431991.1
164rev	TTTCAGGAGAAGAAGAGGAAAGG	TTTCAGGATAAAAAAAGAAATGG	........*..*..*..*..	4	0.0225919	0.324344	NC_037109.1	72815746	72815768	+	intergenic:XM_024443297.1-LOC112266203
164rev	TTTCAGGAGAAGAAGAGGAAAGG	TTTCAGGATAAAAAAAGAAATGG	........*..*..*..*..	4	0.0225919	0.324344	NC_037100.1	23762092	23762114	-	intron:XM_024417427.1
164rev	TTTCAGGAGAAGAAGAGGAAAGG	TTTCAGGATAAAAAAAGAAACGG	........*..*..*..*..	4	0.0225919	0.324344	NW_020142593.1	1199038	1199060	-	intergenic:XR_002953044.1-Gap
164rev	TTTCAGGAGAAGAAGAGGAAAGG	TTGAAGAAGAAGAAGAGGAGGGG	..**..*............*	4	0.444637	0.321981	NC_037105.1	3214897	3214919	-	intergenic:XM_024434182.1-XM_024430811.1
164rev	TTTCAGGAGAAGAAGAGGAAAGG	TTTCACAAGTACAAGAGGAAAGG	.....**..*.*........	4	0.255573	0.318496	NC_037104.1	27586286	27586308	+	intergenic:XR_002954387.1-XM_024429497.1
164rev	TTTCAGGAGAAGAAGAGGAAAGG	ATTAAGAAGAAGAAGAGGGAGGG	*..*..*...........*.	4	0.359838	0.315789	NC_037098.1	131698	131720	-	intron:XM_024439483.1
164rev	TTTCAGGAGAAGAAGAGGAAAGG	TCTGAGAGGAAGAAGAGGAAAGG	.*.*..**............	4	0.932256	0.314286	NC_037104.1	20667970	20667992	+	exon:XM_024429278.1
164rev	TTTCAGGAGAAGAAGAGGAAAGG	GTTCAGGGAAAGAAGAGAAAAGG	*......**........*..	4	0.189614	0.312183	NC_037109.1	64956976	64956998	+	intron:XM_024443177.1
164rev	TTTCAGGAGAAGAAGAGGAAAGG	GTTCCGGAGAAGAAGAAAAATGG	*...*...........**..	4	0.119478	0.30903	NC_037099.1	67118700	67118722	-	intergenic:LOC112224479-XM_024409439.1/XM_024409434.1
164rev	TTTCAGGAGAAGAAGAGGAAAGG	ATCCAGGAGAAGAAGAAGAGAGG	*.*.............*..*	4	0.264758	0.305882	NC_037110.1	23256331	23256353	+	intergenic:XM_024445641.1-XM_024444539.1
164rev	TTTCAGGAGAAGAAGAGGAAAGG	ACTCAGGAGAAGAGGAGGAGAGG	**...........*.....*	4	0.10392	0.305882	NC_037108.1	49592320	49592342	+	intron:XM_024439694.1
164rev	TTTCAGGAGAAGAAGAGGAAAGG	CTTCAAGAGAAGAGGAGGAGAGG	*....*.......*.....*	4	0.0628714	0.305882	NC_037104.1	8790810	8790832	-	intergenic:XM_024430651.1-XM_024428862.1
164rev	TTTCAGGAGAAGAAGAGGAAAGG	GTTAACGAGGAGAAGAGGAAAGG	*..*.*...*..........	4	0.797206	0.305111	NW_020142576.1	124143	124165	+	intron:XM_024415770.1
164rev	TTTCAGGAGAAGAAGAGGAAAGG	TATCAGGAGGAAAAGAGAAAAGG	.*.......*.*.....*..	4	0.140622	0.303748	NC_037106.1	31872711	31872733	-	intergenic:XM_024435317.1-XM_024435322.1/XM_024435321.1/XM_024435320.1/XM_024435319.1/XM_024435318.1/XM_024435316.1/XM_024435323.1/XM_024435317.1
164rev	TTTCAGGAGAAGAAGAGGAAAGG	TTTAGGGATAAAAAGAGGAAGGG	...**...*..*........	4	0.410318	0.301811	NC_037102.1	34024769	34024791	-	intergenic:XM_024423842.1/XM_024423841.1-XM_024423843.1
164rev	TTTCAGGAGAAGAAGAGGAAAGG	TTTAGGGATAAAAAGAGGAAGGG	...**...*..*........	4	0.410318	0.301811	NW_020142510.1	3937292	3937314	+	intergenic:XM_024413262.1-XM_024413559.1/XM_024413558.1
164rev	TTTCAGGAGAAGAAGAGGAAAGG	TCTCAGAAGAAGGAGAGGTAAGG	.*....*.....*.....*.	4	0.13183	0.301003	NC_037101.1	86737629	86737651	-	intergenic:XM_024422348.1-XM_024422354.1
164rev	TTTCAGGAGAAGAAGAGGAAAGG	TGTCGGGAGAGGAAGAGGAGAGG	.*..*.....*........*	4	0.387083	0.300621	NW_020130683.1	31703	31725	-	intergenic:XM_024408819.1-Gap
164rev	TTTCAGGAGAAGAAGAGGAAAGG	AGAGAGGAGAAGAAGAGGAAGGG	****................	4	1.28668	0.3	NW_020128965.1	94430	94452	-	intergenic:LOC112236005-Gap
164rev	TTTCAGGAGAAGAAGAGGAAAGG	TATCAGAGGAAGAGGAGGAAGGG	.*....**.....*......	4	0.152973	0.289573	NC_037127.1	8162747	8162769	+	intergenic:XM_024395260.1-XM_024395062.1
164rev	TTTCAGGAGAAGAAGAGGAAAGG	GGAGAGGAGAAGAAGAGGAAGGG	****................	4	1.28668	0.286957	NW_020131589.1	34707	34729	+	intergenic:XR_002952320.1-XM_024409628.1
164rev	TTTCAGGAGAAGAAGAGGAAAGG	TTTCAGCAGAAAAGAAGGAAGGG	......*....*.**.....	4	0.0183156	0.28183	NC_037117.1	34025121	34025143	-	intergenic:XM_024383450.1-XM_024383451.1
164rev	TTTCAGGAGAAGAAGAGGAAAGG	TGAGAGGAGAAGAAGAAGAACGG	.***............*...	4	0.601049	0.28	NC_037098.1	10778853	10778875	+	intron:XM_024443486.1
164rev	TTTCAGGAGAAGAAGAGGAAAGG	CTGCAGGAGAAAAAGAGAAAGGG	*.*........*.....*..	4	0.150546	0.276923	NC_037108.1	53184216	53184238	+	intergenic:XM_024439736.1-XM_024439735.1
164rev	TTTCAGGAGAAGAAGAGGAAAGG	CTGCAGGAGAAAAAGAGAAAGGG	*.*........*.....*..	4	0.150546	0.276923	NW_020128804.1	4336495	4336517	-	intergenic:XM_024399232.1-XM_024399233.1
164rev	TTTCAGGAGAAGAAGAGGAAAGG	TTTTAGGATAAAAAGAGAAATGG	...*....*..*.....*..	4	0.0885664	0.275692	NC_037128.1	7559912	7559934	-	intergenic:XM_024396586.1-XM_024396323.1
164rev	TTTCAGGAGAAGAAGAGGAAAGG	GTTCAGGAGAGGAGGAAGAAAGG	*.........*..*..*...	4	0.0504095	0.270802	NC_037102.1	37116593	37116615	-	intergenic:XM_024423891.1-XM_024423890.1
164rev	TTTCAGGAGAAGAAGAGGAAAGG	GTTCAGGAGAGAAGGAGGAATGG	*.........**.*......	4	0.0611577	0.270802	NC_037101.1	53884112	53884134	-	intergenic:XM_024421176.1-LOC112251791
164rev	TTTCAGGAGAAGAAGAGGAAAGG	TGACAGGAGAGGAAGAGAAAAGG	.**.......*......*..	4	0.169824	0.27	NC_037100.1	44400358	44400380	-	intergenic:XR_002953276.1-XM_024418203.1
164rev	TTTCAGGAGAAGAAGAGGAAAGG	GAACAGGAGAAGAGGAGGAAAGG	***..........*......	4	0.220836	0.269788	NC_037108.1	43918420	43918442	+	intergenic:XR_002955489.1-XR_002955583.1
164rev	TTTCAGGAGAAGAAGAGGAAAGG	ATTGAGAACAAGAAGAGGAACGG	*..*..*.*...........	4	0.569608	0.269231	NW_020130160.1	11430	11452	-	intergenic:Gap-XM_024408150.1
164rev	TTTCAGGAGAAGAAGAGGAAAGG	ATACAGTAGAGGAAGAGGAAGGG	*.*...*...*.........	4	0.534744	0.265306	NC_037112.1	56194683	56194705	-	intron:XM_024374141.1
164rev	TTTCAGGAGAAGAAGAGGAAAGG	GGTGAGGAGAGGAAGAGGAAAGG	**.*......*.........	4	0.794051	0.26113	NC_037109.1	53817640	53817662	-	intergenic:XM_024442701.1-XM_024442702.1
164rev	TTTCAGGAGAAGAAGAGGAAAGG	TTTCAGATGAGAAAGAGGAAGGG	......**..**........	4	0.243372	0.26	NC_037121.1	7179425	7179447	-	intron:XM_024387510.1
164rev	TTTCAGGAGAAGAAGAGGAAAGG	CAAGAGGAGAAGAAGAGGAATGG	****................	4	1.28668	0.259027	NW_020128842.1	705442	705464	+	intron:LOC112234742
164rev	TTTCAGGAGAAGAAGAGGAAAGG	TGTCAGCAGAAGAAAAGCAACGG	.*....*.......*..*..	4	0.0568047	0.258824	NW_020129480.1	103668	103690	+	intergenic:XM_024406794.1-Gap
164rev	TTTCAGGAGAAGAAGAGGAAAGG	TACCAGGAGAAAAAGAGGAGAGG	.**........*.......*	4	0.33834	0.258824	NC_037105.1	60566334	60566356	+	intron:XM_024432484.1/XM_024432483.1/XM_024432482.1/XM_024432481.1
164rev	TTTCAGGAGAAGAAGAGGAAAGG	TACCAGGAGAAAAAGAGGAGAGG	.**........*.......*	4	0.33834	0.258824	NC_037105.1	48340101	48340123	+	intron:XM_024432219.1/XM_024432218.1/XM_024432217.1/XM_024432216.1
164rev	TTTCAGGAGAAGAAGAGGAAAGG	CATCAGGAGAAGAGGAGGAGCGG	**...........*.....*	4	0.10392	0.258824	NC_037126.1	4656093	4656115	+	intergenic:XM_024393215.1-LOC112229079
164rev	TTTCAGGAGAAGAAGAGGAAAGG	CCTCAGGAGAAAAAGAGGGAAGG	**.........*......*.	4	0.25921	0.257143	NC_037115.1	48668830	48668852	+	intron:XM_024380257.1
164rev	TTTCAGGAGAAGAAGAGGAAAGG	CTTCAGATGAAGAAGAGAAATGG	*.....**.........*..	4	0.211958	0.254317	NC_037101.1	84464304	84464326	-	intergenic:XR_002953736.1-XM_024422595.1
164rev	TTTCAGGAGAAGAAGAGGAAAGG	TTGCAGAACAAGAAAAGGAAGGG	..*...*.*.....*.....	4	0.16576	0.253394	NC_037109.1	65285885	65285907	+	intergenic:XM_024443186.1/XM_024443185.1/XM_024443184.1-XM_024443187.1
164rev	TTTCAGGAGAAGAAGAGGAAAGG	GTACAGTAAAAGAAGAGGAATGG	*.*...*.*...........	4	0.561634	0.250982	NC_037106.1	2446428	2446450	-	intergenic:XM_024434375.1-XM_024434399.1/XM_024434398.1
164rev	TTTCAGGAGAAGAAGAGGAAAGG	GTACAGTAAAAGAAGAGGAATGG	*.*...*.*...........	4	0.561634	0.250982	NC_037106.1	2446932	2446954	-	intergenic:XM_024434375.1-XM_024434399.1/XM_024434398.1
164rev	TTTCAGGAGAAGAAGAGGAAAGG	ATGGAGAAGAAGAAGAGGAAAGG	*.**..*.............	4	0.919204	0.25	NC_037111.1	38824700	38824722	-	intron:XM_024373897.1
164rev	TTTCAGGAGAAGAAGAGGAAAGG	ATTGAGGAGAGGAAGAGGAGTGG	*..*......*........*	4	0.387083	0.248529	NC_037114.1	37930580	37930602	-	intergenic:XM_024378580.1-XM_024378624.1
164rev	TTTCAGGAGAAGAAGAGGAAAGG	TGTCAGGAGGAGAAGAGAAGGGG	.*.......*.......*.*	4	0.1259	0.247059	NW_020142633.1	508578	508600	+	intergenic:XR_002953091.1/XR_002953090.1-XM_024416310.1
164rev	TTTCAGGAGAAGAAGAGGAAAGG	TGTCAGGAGGAGAAGAGAAGGGG	.*.......*.......*.*	4	0.1259	0.247059	NC_037125.1	9494476	9494498	+	intergenic:XR_002949917.1/XR_002949916.1-XM_024392333.1
164rev	TTTCAGGAGAAGAAGAGGAAAGG	ATGCAGGAAAAGAAGAGGAGTGG	*.*.....*..........*	4	0.420174	0.245798	NW_020142630.1	150818	150840	-	intergenic:Gap-XM_024416263.1
164rev	TTTCAGGAGAAGAAGAGGAAAGG	ATGCAGGAAAAGAAGAGGAGTGG	*.*.....*..........*	4	0.420174	0.245798	NW_020142630.1	92941	92963	+	intergenic:Gap-XM_024416263.1
164rev	TTTCAGGAGAAGAAGAGGAAAGG	TTAGAACAGAAGAAGAGGAACGG	..**.**.............	4	0.531674	0.245536	NW_020142510.1	10001950	10001972	+	intergenic:XR_002952717.1-XM_024413416.1
164rev	TTTCAGGAGAAGAAGAGGAAAGG	TTAGAACAGAAGAAGAGGAACGG	..**.**.............	4	0.531674	0.245536	NC_037101.1	38823602	38823624	+	intergenic:XR_002953705.1-XM_024420738.1
164rev	TTTCAGGAGAAGAAGAGGAAAGG	TGACAGGGGGAGAAGAGGAAAGG	.**....*.*..........	4	1.23951	0.244444	NC_037110.1	55063752	55063774	-	intron:XM_024445746.1
164rev	TTTCAGGAGAAGAAGAGGAAAGG	TTATAGGAGGAGAAGAGGAGCGG	..**.....*.........*	4	0.599577	0.242764	NC_037108.1	21998913	21998935	+	intron:XM_024440678.1
164rev	TTTCAGGAGAAGAAGAGGAAAGG	TTTCAGATGAAGAAGAAGATGGG	......**........*..*	4	0.164825	0.24	NC_037099.1	74280978	74281000	+	intergenic:XM_024410743.1/XM_024410738.1-XM_024410753.1
164rev	TTTCAGGAGAAGAAGAGGAAAGG	TTTCAGATGAAGAAGAAGATGGG	......**........*..*	4	0.164825	0.24	NW_020142538.1	1921174	1921196	-	intergenic:XM_024414878.1/XM_024414877.1-XM_024414898.1/XM_024414897.1
164rev	TTTCAGGAGAAGAAGAGGAAAGG	GTTGAGGAGAGGAAGAGGAGAGG	*..*......*........*	4	0.387083	0.237724	NC_037104.1	47066899	47066921	-	intergenic:XM_024429869.1-XM_024429867.1/XM_024429866.1
164rev	TTTCAGGAGAAGAAGAGGAAAGG	CAGCAGGAGAGGAAGAGGAATGG	***.......*.........	4	0.782934	0.235714	NC_037100.1	35227455	35227477	+	intergenic:XM_024417890.1/XM_024417889.1-XM_024417891.1
164rev	TTTCAGGAGAAGAAGAGGAAAGG	CAGCAGGAGAGGAAGAGGAATGG	***.......*.........	4	0.782934	0.235714	NC_037100.1	38233504	38233526	+	intergenic:XM_024417994.1/XM_024417993.1-XM_024417995.1
164rev	TTTCAGGAGAAGAAGAGGAAAGG	CAGCAGGAGAGGAAGAGGAATGG	***.......*.........	4	0.782934	0.235714	NC_037126.1	41563157	41563179	+	intergenic:LOC112229028-XM_024394906.1/XM_024394907.1
164rev	TTTCAGGAGAAGAAGAGGAAAGG	ATTAAGGTGAAGGAGAGGAAGGG	*..*...*....*.......	4	0.581725	0.235371	NC_037110.1	34543316	34543338	+	intron:XM_024445034.1
164rev	TTTCAGGAGAAGAAGAGGAAAGG	ATGGAGGAGAAGAAGAAGAATGG	*.**............*...	4	0.601049	0.233333	NW_020128857.1	379224	379246	+	intron:XM_024403259.1
164rev	TTTCAGGAGAAGAAGAGGAAAGG	CTTCAGGAGAAGAAAAGGGGGGG	*.............*...**	4	0.0588785	0.23134	NW_020129687.1	210171	210193	-	intron:XM_024407275.1
164rev	TTTCAGGAGAAGAAGAGGAAAGG	GTGAAGTAGAAGAAGAGGAAGGG	*.**..*.............	4	0.919204	0.230141	NW_020142537.1	1593272	1593294	-	intergenic:XM_024414673.1-XR_002952931.1/XR_002952930.1
164rev	TTTCAGGAGAAGAAGAGGAAAGG	GTGAAGTAGAAGAAGAGGAAGGG	*.**..*.............	4	0.919204	0.230141	NW_020142537.1	771603	771625	+	intergenic:XR_002952929.1/XR_002952928.1-XM_024414688.1
164rev	TTTCAGGAGAAGAAGAGGAAAGG	CTGCAGCAGAAGAAGAGGAGTGG	*.*...*............*	4	0.469687	0.225315	NW_020128970.1	84526	84548	-	intron:XM_024404603.1
164rev	TTTCAGGAGAAGAAGAGGAAAGG	CTGCAGCAGAAGAAGAGGAGTGG	*.*...*............*	4	0.469687	0.225315	NW_020128970.1	92853	92875	-	intron:XM_024404603.1
164rev	TTTCAGGAGAAGAAGAGGAAAGG	GTGCAGGATTAGAAGAGGAATGG	*.*.....**..........	4	0.793841	0.225064	NC_037105.1	54949893	54949915	+	intergenic:XM_024432371.1-XM_024432373.1/XM_024432372.1
164rev	TTTCAGGAGAAGAAGAGGAAAGG	GTGCAGGATTAGAAGAGGAATGG	*.*.....**..........	4	0.793841	0.225064	NC_037105.1	42723660	42723682	+	intergenic:XM_024432103.1-XM_024432106.1/XM_024432105.1
164rev	TTTCAGGAGAAGAAGAGGAAAGG	TCACAGTAAAAGAAGAGGAAGGG	.**...*.*...........	4	0.561634	0.224906	NC_037103.1	27483620	27483642	+	exon:XM_024426312.1
164rev	TTTCAGGAGAAGAAGAGGAAAGG	GGCCAGGAGAAGGAGAGGAAGGG	***.........*.......	4	0.573581	0.224575	NC_037129.1	3975403	3975425	+	intron:XM_024398236.1
164rev	TTTCAGGAGAAGAAGAGGAAAGG	TCTCAGGGGAAGAGGAGGAGAGG	.*.....*.....*.....*	4	0.10392	0.224314	NC_037098.1	52555930	52555952	+	intergenic:XM_024384079.1-XR_002955395.1
164rev	TTTCAGGAGAAGAAGAGGAAAGG	GTAGAGGAGAAGGAGAGGAAGGG	*.**........*.......	4	0.573581	0.222792	NC_037097.1	9024679	9024701	-	intergenic:XM_024381414.1/XM_024381357.1-XM_024381526.1
164rev	TTTCAGGAGAAGAAGAGGAAAGG	TTTCGCGAGAGGAAGAGAAAGGG	....**....*......*..	4	0.0989261	0.220909	NC_037104.1	5450941	5450963	+	intergenic:XM_024428749.1-XM_024430598.1
164rev	TTTCAGGAGAAGAAGAGGAAAGG	TTTAAGAAGGAGAGGAGGAAGGG	...*..*..*...*......	4	0.134098	0.218324	NC_037112.1	48665532	48665554	+	intron:XM_024375622.1
164rev	TTTCAGGAGAAGAAGAGGAAAGG	TTTAAGAAGGAGAGGAGGAAGGG	...*..*..*...*......	4	0.134098	0.218324	NW_020128805.1	4640415	4640437	-	intron:XM_024399789.1
164rev	TTTCAGGAGAAGAAGAGGAAAGG	TGCCAGGAAAAGAAAAGGAAGGG	.**.....*.....*.....	4	0.242694	0.217815	NC_037116.1	7261519	7261541	+	intergenic:XM_024381655.1/XM_024381654.1/XM_024381653.1/XR_002948824.1-XM_024381656.1
164rev	TTTCAGGAGAAGAAGAGGAAAGG	TGTGAGGAGGAGAAGAAGAAAGG	.*.*.....*......*...	4	0.561426	0.217778	NC_037125.1	8717964	8717986	+	intron:XM_024392294.1
164rev	TTTCAGGAGAAGAAGAGGAAAGG	TGTAAGGAGAGGAGGAGGAATGG	.*.*......*..*......	4	0.124304	0.214568	NC_037097.1	91774052	91774074	-	intergenic:LOC112261458-XM_024428032.1
164rev	TTTCAGGAGAAGAAGAGGAAAGG	CTTCAGGAGGAGAAAAGCAAGGG	*........*....*..*..	4	0.076599	0.213419	NC_037112.1	47584068	47584090	-	intergenic:XM_024374133.1-XR_002948269.1/XM_024375579.1
164rev	TTTCAGGAGAAGAAGAGGAAAGG	TATCAGGAGAATAAAAGAAAAGG	.*.........*..*..*..	4	0.0409193	0.212054	NW_020142494.1	1466289	1466311	+	intergenic:XM_024412346.1-LOC112244637
164rev	TTTCAGGAGAAGAAGAGGAAAGG	AGGGAGGAGAAGAAGAGGAAGGG	****................	4	1.28668	0.21	NW_020130926.1	10009	10031	-	intergenic:Gap-XM_024409087.1
164rev	TTTCAGGAGAAGAAGAGGAAAGG	AGGGAGGAGAAGAAGAGGAAAGG	****................	4	1.28668	0.21	NC_037099.1	70475007	70475029	+	intergenic:XM_024414241.1-XM_024388241.1
164rev	TTTCAGGAGAAGAAGAGGAAAGG	TTCCACGAGAAGAAGAAGAGAGG	..*..*..........*..*	4	0.151636	0.208556	NC_037105.1	14873045	14873067	-	exon:XM_024431169.1/XM_024431168.1/XM_024431167.1
164rev	TTTCAGGAGAAGAAGAGGAAAGG	TTTCAGTGAAAGAAGAGGAGGGG	......***..........*	4	0.26158	0.206002	NW_020142508.1	16509	16531	-	intergenic:Gap-XR_002952675.1
164rev	TTTCAGGAGAAGAAGAGGAAAGG	TTTCAGTGAAAGAAGAGGAGGGG	......***..........*	4	0.26158	0.206002	NC_037105.1	31992871	31992893	-	intergenic:XR_002954657.1-LOC112259284
164rev	TTTCAGGAGAAGAAGAGGAAAGG	TTTCAGTGAAAGAAGAGGAGGGG	......***..........*	4	0.26158	0.206002	NC_037103.1	7428504	7428526	-	intron:XR_002954067.1
164rev	TTTCAGGAGAAGAAGAGGAAAGG	TTTCAGTGAAAGAAGAGGAGGGG	......***..........*	4	0.26158	0.206002	NC_037128.1	11977859	11977881	-	intergenic:LOC112230424-XM_024396735.1
164rev	TTTCAGGAGAAGAAGAGGAAAGG	TTTCAGTGAAAGAAGAGGAGGGG	......***..........*	4	0.26158	0.206002	NW_020130220.1	667140	667162	+	intron:XR_002951919.1
164rev	TTTCAGGAGAAGAAGAGGAAAGG	TTTCAGTGAAAGAAGAGGAGGGG	......***..........*	4	0.26158	0.206002	NW_020142508.1	262822	262844	-	intron:XM_024413010.1
164rev	TTTCAGGAGAAGAAGAGGAAAGG	TTTCAGTGAAAGAAGAGGAGGGG	......***..........*	4	0.26158	0.206002	NC_037128.1	11930179	11930201	-	intron:LOC112230424
164rev	TTTCAGGAGAAGAAGAGGAAAGG	TTAGAGGAGTAGGAGAGGAAGGG	..**.....*..*.......	4	0.502809	0.205517	NC_037112.1	66512635	66512657	-	intergenic:XM_024376378.1-XM_024374169.1
164rev	TTTCAGGAGAAGAAGAGGAAAGG	GAGGAGGAGAAGAAGAGGAAGGG	****................	4	1.28668	0.202341	NC_037108.1	64251736	64251758	+	intergenic:XR_002955527.1-XM_024440758.1
164rev	TTTCAGGAGAAGAAGAGGAAAGG	GAGGAGGAGAAGAAGAGGAATGG	****................	4	1.28668	0.202341	NC_037108.1	3920523	3920545	+	intergenic:XM_024440583.1-XM_024438134.1
164rev	TTTCAGGAGAAGAAGAGGAAAGG	TCTGAGGGAAAGAAGAGGAAAGG	.*.*...**...........	4	0.83398	0.202041	NC_037117.1	11568930	11568952	+	exon:XM_024382864.1
164rev	TTTCAGGAGAAGAAGAGGAAAGG	ATTCTGAAGGAGAAGAGGAATGG	*...*.*..*..........	4	0.899986	0.20202	NC_037102.1	50706029	50706051	+	intergenic:XM_024425378.1-XM_024425379.1
164rev	TTTCAGGAGAAGAAGAGGAAAGG	TTTCAGAAGGAGAGGAGGAGCGG	......*..*...*.....*	4	0.0587502	0.198257	NC_037110.1	24615325	24615347	-	intergenic:XM_024444602.1-XM_024444611.1
164rev	TTTCAGGAGAAGAAGAGGAAAGG	TATATGGAGAAGAAGAGGAGAGG	.*.**..............*	4	0.697447	0.198142	NW_020129362.1	21157	21179	+	intron:XM_024406470.1
164rev	TTTCAGGAGAAGAAGAGGAAAGG	TTTCAGGAGAGGAAGAAGTTTGG	..........*.....*.**	4	0.0401565	0.196	NW_020130897.1	18829	18851	+	intergenic:XM_024409059.1-Gap
164rev	TTTCAGGAGAAGAAGAGGAAAGG	TTTAGGGAGAAGAGGAGAAAGGG	...**........*...*..	4	0.0438984	0.195887	NC_037099.1	9290230	9290252	-	intergenic:XM_024392719.1-XM_024412192.1
164rev	TTTCAGGAGAAGAAGAGGAAAGG	TCTCAGGAGAAAGAGAGGGAAGG	.*.........**.....*.	4	0.094964	0.195652	NC_037115.1	48668605	48668627	+	intron:XM_024380257.1
164rev	TTTCAGGAGAAGAAGAGGAAAGG	GTTCAAGAGAAGACAAGGAAGGG	*....*.......**.....	4	0.0363147	0.192912	NC_037109.1	26737015	26737037	+	intergenic:XM_024441666.1/XM_024441665.1-LOC112264812
164rev	TTTCAGGAGAAGAAGAGGAAAGG	TTTCACGAGTAGATGAGGATGGG	.....*...*...*.....*	4	0.0520408	0.192513	NC_037111.1	12295247	12295269	-	intergenic:XM_024373059.1/XM_024373058.1-XM_024373060.1
164rev	TTTCAGGAGAAGAAGAGGAAAGG	GCTGAGGAGAAGAGGAGGAAAGG	**.*.........*......	4	0.223972	0.191304	NC_037110.1	38144663	38144685	-	intergenic:XM_024445195.1/XM_024445196.1-XM_024445799.1
164rev	TTTCAGGAGAAGAAGAGGAAAGG	ATGGAGGAGAAGAAGAGGAGAGG	*.**...............*	4	0.687683	0.191176	NW_020130606.1	31438	31460	-	intergenic:Gap-XM_024408749.1
164rev	TTTCAGGAGAAGAAGAGGAAAGG	TCTGAGGGGAAGAAGAGGATGGG	.*.*...*...........*	4	0.697447	0.188571	NC_037100.1	3638985	3639007	+	intron:XM_024419279.1
164rev	TTTCAGGAGAAGAAGAGGAAAGG	TCTCAGGAGAACAAGAGAATAGG	.*.........*.....*.*	4	0.0672562	0.188494	NC_037103.1	50767151	50767173	-	intergenic:XM_024427058.1-XM_024427061.1
164rev	TTTCAGGAGAAGAAGAGGAAAGG	TCTCAGGGGAATAAGAGGAGAGG	.*.....*...*.......*	4	0.343144	0.184874	NC_037110.1	12675749	12675771	-	intron:XM_024445898.1
164rev	TTTCAGGAGAAGAAGAGGAAAGG	TCTCAGGGGAATAAGAGGAGAGG	.*.....*...*.......*	4	0.343144	0.184874	NC_037103.1	15089203	15089225	+	intron:XM_024428224.1
164rev	TTTCAGGAGAAGAAGAGGAAAGG	TCTGATGAAAAGAAGAGGAAAGG	.*.*.*..*...........	4	0.504558	0.183673	NC_037118.1	11699852	11699874	-	intergenic:XM_024384112.1/XM_024384111.1-XM_024384118.1/XM_024384117.1/XM_024384116.1/XM_024384115.1/XM_024384114.1/XM_024384113.1
164rev	TTTCAGGAGAAGAAGAGGAAAGG	TTTCAGGAAGAGGAGAGGAGGGG	........**..*......*	4	0.129928	0.178115	NC_037107.1	27633057	27633079	-	intergenic:XM_024437351.1-XM_024437352.1
164rev	TTTCAGGAGAAGAAGAGGAAAGG	TTTCAGGAAGAGGAGAGGAGGGG	........**..*......*	4	0.129928	0.178115	NW_020128813.1	2131861	2131883	+	intergenic:XM_024400644.1-XM_024400646.1
164rev	TTTCAGGAGAAGAAGAGGAAAGG	TTAGAGGAGAAGGAGAGGAGAGG	..**........*......*	4	0.25194	0.178115	NC_037099.1	8582469	8582491	-	intergenic:XM_024392382.1/XM_024392370.1-XM_024392376.1
164rev	TTTCAGGAGAAGAAGAGGAAAGG	TTTGAGAAGAAGGTGAGGAAAGG	...*..*.....**......	4	0.0563473	0.173913	NC_037115.1	18145036	18145058	+	intergenic:XR_002948618.1-XM_024379161.1
164rev	TTTCAGGAGAAGAAGAGGAAAGG	GGTCAGGAGACGAAGAGGTAGGG	**........*.......*.	4	0.292401	0.173057	NC_037122.1	45333859	45333881	+	intergenic:XM_024389818.1-LOC112224901
164rev	TTTCAGGAGAAGAAGAGGAAAGG	TGCCAGGGGAGGAAGAGGAAGGG	.**....*..*.........	4	0.782934	0.1716	NC_037103.1	79634048	79634070	-	intergenic:XM_024428073.1-XR_002954267.1
164rev	TTTCAGGAGAAGAAGAGGAAAGG	CTACAAGAGAAGAACAGGAAAGG	*.*..*........*.....	4	0.240311	0.166976	NC_037111.1	32649200	32649222	+	intron:XM_024373924.1
164rev	TTTCAGGAGAAGAAGAGGAAAGG	TTACAGGAGAGGAGGAGGAGAGG	..*.......*..*.....*	4	0.053835	0.165686	NC_037113.1	6727231	6727253	+	intergenic:XM_024376832.1-XR_002948396.1
164rev	TTTCAGGAGAAGAAGAGGAAAGG	TTTCAGAAGAGGAAGAGTGAGGG	......*...*......**.	4	0.0351793	0.1625	NC_037121.1	23465435	23465457	-	intergenic:XM_024388093.1-XM_024387303.1
164rev	TTTCAGGAGAAGAAGAGGAAAGG	ATGGAGGAGAGGAAGAGGAAAGG	*.**......*.........	4	0.782934	0.1625	NC_037110.1	50009608	50009630	+	intron:XM_024445720.1
164rev	TTTCAGGAGAAGAAGAGGAAAGG	TTTCACATGGAGAAGAGGAACGG	.....***.*..........	4	0.496624	0.162338	NW_020129071.1	37896	37918	+	intron:XM_024405231.1
164rev	TTTCAGGAGAAGAAGAGGAAAGG	GTTCAGGAGAAGGAGAGAGAAGG	*...........*....**.	4	0.0399625	0.161953	NC_037102.1	72294751	72294773	-	intergenic:XM_024425140.1-XM_024425142.1/XM_024425140.1
164rev	TTTCAGGAGAAGAAGAGGAAAGG	GTTGGGGAGAAGAGGAGGAAGGG	*..**........*......	4	0.223972	0.160696	NC_037109.1	51810249	51810271	+	intergenic:XM_024442623.1/XM_024442622.1/XM_024442621.1/XM_024442620.1/XM_024442618.1/XM_024442617.1/XM_024442616.1/XM_024442615.1/XM_024442614.1/XM_024442613.1/XM_024442612.1/XM_024442611.1/XM_024442610.1/XM_024442609.1-XM_024442624.1
164rev	TTTCAGGAGAAGAAGAGGAAAGG	ATTTAGGAGAACAAGAGGGAGGG	*..*.......*......*.	4	0.25921	0.158824	NC_037103.1	51380728	51380750	-	intron:XM_024427079.1
164rev	TTTCAGGAGAAGAAGAGGAAAGG	ATTTAGGAGAACAAGAGGGAGGG	*..*.......*......*.	4	0.25921	0.158824	NC_037098.1	37915246	37915268	-	intron:XM_024379808.1
164rev	TTTCAGGAGAAGAAGAGGAAAGG	ATTTAGGAGAACAAGAGGGAGGG	*..*.......*......*.	4	0.25921	0.158824	NC_037098.1	37913775	37913797	+	intron:XM_024379808.1
164rev	TTTCAGGAGAAGAAGAGGAAAGG	GAACAGGAGAAGAACAGGAAAGG	***...........*.....	4	0.397208	0.157668	NW_020142596.1	11612	11634	-	exon:XM_024416013.1
164rev	TTTCAGGAGAAGAAGAGGAAAGG	AGGCAGGAGAAGAAGAGGGAGGG	***...............*.	4	0.519473	0.1575	NC_037118.1	8371806	8371828	+	intergenic:XM_024383637.1-XM_024383907.1
164rev	TTTCAGGAGAAGAAGAGGAAAGG	CTTCAGGAGAGGAGGAGGATAGG	*.........*..*.....*	4	0.0576754	0.156	NC_037097.1	72834390	72834412	-	intron:XM_024429891.1
164rev	TTTCAGGAGAAGAAGAGGAAAGG	GTGGAGGAGAAGGAGAGGAAGGG	*.**........*.......	4	0.573581	0.155955	NC_037097.1	9024973	9024995	-	intergenic:XM_024381414.1/XM_024381357.1-XM_024381526.1
164rev	TTTCAGGAGAAGAAGAGGAAAGG	ATTGAGGAGCAGAAGAAGAAAGG	*..*.....*......*...	4	0.561426	0.155556	NC_037128.1	2201836	2201858	+	exon:LOC112230097
164rev	TTTCAGGAGAAGAAGAGGAAAGG	TTTCAGGAGAGCGAGAGAAAGGG	..........***....*..	4	0.0282709	0.155371	NC_037114.1	13051552	13051574	-	intergenic:XM_024377854.1-XM_024377856.1
164rev	TTTCAGGAGAAGAAGAGGAAAGG	ATTCAGGATATGAAAAGGAACGG	*.......*.*...*.....	4	0.136608	0.154449	NC_037111.1	21357946	21357968	-	exon:XM_024373336.1/XM_024373338.1
164rev	TTTCAGGAGAAGAAGAGGAAAGG	TTCCAGGATTAGAAGAGGAGAGG	..*.....**.........*	4	0.366342	0.154226	NC_037124.1	39273504	39273526	+	intergenic:XM_024392170.1-LOC112226422
164rev	TTTCAGGAGAAGAAGAGGAAAGG	TTTCAGGGCAGGAAGAGGATTGG	.......**.*........*	4	0.212558	0.154	NC_037107.1	23170677	23170699	-	intergenic:XM_024437098.1-XR_002955186.1
164rev	TTTCAGGAGAAGAAGAGGAAAGG	GCTGAGGAGAAGAAGAGGGAAGG	**.*..............*.	4	0.526849	0.153727	NW_020129974.1	328	350	-	intergenic:Gap-XM_024407853.1
164rev	TTTCAGGAGAAGAAGAGGAAAGG	TCGCAGGAGAAGATGAGTAAGGG	.**..........*...*..	4	0.0455923	0.152381	NC_037116.1	20389638	20389660	+	intergenic:XM_024382127.1-XM_024382130.1/XM_024382129.1
164rev	TTTCAGGAGAAGAAGAGGAAAGG	ATTCAGGGGAAGTAGAGAAAGGG	*......*....*....*..	4	0.120099	0.152308	NC_037106.1	832786	832808	-	intergenic:rna25550-XM_024434337.1
164rev	TTTCAGGAGAAGAAGAGGAAAGG	TGTGAGGAGGAGGAGAGGAAAGG	.*.*.....*..*.......	4	0.509948	0.152174	NW_020129600.1	68026	68048	+	intergenic:Gap-XM_024407121.1
164rev	TTTCAGGAGAAGAAGAGGAAAGG	TTTCAGGAGAAAAAAATAAATGG	...........*..*.**..	4	0.013581	0.152036	NC_037099.1	29683116	29683138	-	intron:LOC112233062
164rev	TTTCAGGAGAAGAAGAGGAAAGG	TTTCAGGAGAAAAAAATAAATGG	...........*..*.**..	4	0.013581	0.152036	NC_037099.1	26231508	26231530	+	intron:LOC112232463
164rev	TTTCAGGAGAAGAAGAGGAAAGG	TCTCAGGAGTTGGAGAGGAAAGG	.*.......**.*.......	4	0.283021	0.151766	NC_037106.1	7464152	7464174	+	intergenic:XR_002955085.1-XM_024436396.1
164rev	TTTCAGGAGAAGAAGAGGAAAGG	TTTGACGAGAAAAGGAGGAAGGG	...*.*.....*.*......	4	0.0634545	0.148485	NC_037104.1	20787589	20787611	-	intergenic:XM_024429298.1/XM_024429297.1-XM_024429299.1
164rev	TTTCAGGAGAAGAAGAGGAAAGG	TTTCAGGAGAGGGAGAAGGACGG	..........*.*...*.*.	4	0.0355541	0.14837	NC_037115.1	28501098	28501120	-	intron:XM_024379468.1
164rev	TTTCAGGAGAAGAAGAGGAAAGG	TTTCAGGAGAGGGAGAAGGATGG	..........*.*...*.*.	4	0.0355541	0.14837	NC_037102.1	25695620	25695642	-	intron:LOC112252395
164rev	TTTCAGGAGAAGAAGAGGAAAGG	GTTCTGGAGGAGAAGAGGAGAGG	*...*....*.........*	4	0.642349	0.147769	NW_020129260.1	5499	5521	+	intergenic:Gap-XM_024406102.1
164rev	TTTCAGGAGAAGAAGAGGAAAGG	TGTGAGGAGAAAAAGAGGGAGGG	.*.*.......*......*.	4	0.245385	0.147	NC_037110.1	18193164	18193186	+	intergenic:XM_024444365.1/XM_024444364.1-XM_024444366.1
164rev	TTTCAGGAGAAGAAGAGGAAAGG	TGTGAGGAGAAAAAGAGGGAGGG	.*.*.......*......*.	4	0.245385	0.147	NC_037104.1	59256296	59256318	+	intron:XM_024430313.1/XM_024430311.1/XM_024430310.1
164rev	TTTCAGGAGAAGAAGAGGAAAGG	TTAGAGGGGGAGAAGAGGAAGGG	..**...*.*..........	4	1.23951	0.145503	NC_037115.1	17462295	17462317	-	intergenic:XM_024380395.1-XM_024379159.1
164rev	TTTCAGGAGAAGAAGAGGAAAGG	TCTCTGAAGAAGAGGAGGAAGGG	.*..*.*......*......	4	0.152973	0.145455	NC_037102.1	6400778	6400800	+	intron:XM_024425262.1
164rev	TTTCAGGAGAAGAAGAGGAAAGG	GATCAGGAGAGGAACAGGAATGG	**........*...*.....	4	0.223581	0.143478	NW_020129127.1	320554	320576	-	intergenic:LOC112236937-Gap
164rev	TTTCAGGAGAAGAAGAGGAAAGG	TAACTGGAGAAGGAGAGGAATGG	.**.*.......*.......	4	0.545938	0.143335	NC_037112.1	64579321	64579343	+	exon:XM_024376319.1/XM_024376318.1
164rev	TTTCAGGAGAAGAAGAGGAAAGG	TTTAGGGAGATGAAGAGGAGAGG	...**.....*........*	4	0.366439	0.142663	NC_037122.1	23988080	23988102	-	exon:XM_024389346.1
164rev	TTTCAGGAGAAGAAGAGGAAAGG	TTAGAGTAGAAGAAGAGAAAAGG	..**..*..........*..	4	0.20899	0.141287	NC_037113.1	13341527	13341549	+	intron:XM_024377461.1
164rev	TTTCAGGAGAAGAAGAGGAAAGG	TATCAGGAAAAGAAGAGAGAAGG	.*......*........**.	4	0.0597283	0.141219	NC_037105.1	54797602	54797624	-	intron:XM_024432371.1
164rev	TTTCAGGAGAAGAAGAGGAAAGG	TATCAGGAAAAGAAGAGAGAAGG	.*......*........**.	4	0.0597283	0.141219	NC_037105.1	42571369	42571391	-	intron:XM_024432103.1
164rev	TTTCAGGAGAAGAAGAGGAAAGG	TCCCATTAGAAGAAGAGGAAGGG	.**..**.............	4	0.531674	0.139942	NC_037114.1	24700281	24700303	-	intron:XM_024378266.1/XM_024378265.1
164rev	TTTCAGGAGAAGAAGAGGAAAGG	TCCCATTAGAAGAAGAGGAAGGG	.**..**.............	4	0.531674	0.139942	NC_037114.1	22004198	22004220	-	intron:XM_024378185.1/XM_024378184.1
164rev	TTTCAGGAGAAGAAGAGGAAAGG	TTACTGTAGAAGAAAAGGAAAGG	..*.*.*.......*.....	4	0.271293	0.139692	NC_037113.1	17323757	17323779	-	intergenic:XM_024377167.1-XM_024377168.1
164rev	TTTCAGGAGAAGAAGAGGAAAGG	TATCAGGAGAGGAAGAGTGACGG	.*........*......**.	4	0.054254	0.1375	NC_037112.1	29557418	29557440	+	intron:XM_024374897.1/XM_024374896.1/XM_024374895.1/XM_024374894.1/XM_024374893.1/XM_024374892.1/XM_024374890.1/XM_024374889.1/XM_024374888.1/XM_024374887.1
164rev	TTTCAGGAGAAGAAGAGGAAAGG	TAGGAGGAGAGGAAGAGGAAAGG	.***......*.........	4	0.782934	0.1375	NW_020142677.1	100643	100665	+	intron:XM_024416557.1
164rev	TTTCAGGAGAAGAAGAGGAAAGG	TTGACGGAGAAGGAGAGGAAAGG	..***.......*.......	4	0.545938	0.1373	NC_037110.1	31847489	31847511	-	intergenic:XR_002956111.1-XR_002956112.1
164rev	TTTCAGGAGAAGAAGAGGAAAGG	TTGACGGAGAAGGAGAGGAAAGG	..***.......*.......	4	0.545938	0.1373	NC_037110.1	31927873	31927895	+	intergenic:XR_002956111.1-XR_002956112.1
164rev	TTTCAGGAGAAGAAGAGGAAAGG	AGTCAGGAGAAGGAGATGAAGGG	**..........*...*...	4	0.235909	0.136957	NW_020128836.1	133310	133332	-	intergenic:XM_024402694.1-Gap
164rev	TTTCAGGAGAAGAAGAGGAAAGG	AGTCAGGAGAAGAAGACAAAAGG	**..............**..	4	0.119478	0.136833	NC_037127.1	12921314	12921336	-	intergenic:XM_024395400.1/XM_024395399.1-XM_024395399.1/XM_024395400.1
164rev	TTTCAGGAGAAGAAGAGGAAAGG	TATGAGGAGAAGAGGAGAAAAGG	.*.*.........*...*..	4	0.0462397	0.136686	NC_037127.1	18778226	18778248	+	intron:XM_024395565.1/XM_024395564.1/XM_024395563.1/XM_024395562.1
164rev	TTTCAGGAGAAGAAGAGGAAAGG	TATGAGGAGAAGAGGAGAAAAGG	.*.*.........*...*..	4	0.0462397	0.136686	NC_037099.1	16735459	16735481	+	intron:XM_024396054.1
164rev	TTTCAGGAGAAGAAGAGGAAAGG	TATGAGGAGAAGAGGAGAAAAGG	.*.*.........*...*..	4	0.0462397	0.136686	NC_037118.1	367158	367180	+	intergenic:XR_002949042.1-XM_024383525.1
164rev	TTTCAGGAGAAGAAGAGGAAAGG	TCTCAGGAGAGGGAGAGGGAGGG	.*........*.*.....*.	4	0.107124	0.136258	NC_037113.1	22509430	22509452	+	intergenic:XR_002948435.1-XM_024377427.1
164rev	TTTCAGGAGAAGAAGAGGAAAGG	TGTGAGGAGAAGAGGAGAAACGG	.*.*.........*...*..	4	0.0462397	0.135692	NW_020129625.1	50822	50844	-	intergenic:XM_024407181.1-LOC112238619
164rev	TTTCAGGAGAAGAAGAGGAAAGG	TTAAAGGAGAAGAAGAGGGTAGG	..**..............**	4	0.205067	0.135338	NC_037106.1	7628277	7628299	+	intergenic:XR_002955085.1-XM_024436396.1
164rev	TTTCAGGAGAAGAAGAGGAAAGG	GTTAAGGAGGAGTAGAGGAAGGG	*..*.....*..*.......	4	0.535768	0.134249	NC_037109.1	68056202	68056224	+	intergenic:LOC112266167-XM_024443241.1/XR_002955802.1
164rev	TTTCAGGAGAAGAAGAGGAAAGG	TTTCAGGATAATAAAAGAAACGG	........*..*..*..*..	4	0.0225919	0.133658	NC_037116.1	41620677	41620699	-	intron:XM_024381055.1/XM_024381054.1/XM_024381053.1/XM_024381052.1/XM_024381051.1
164rev	TTTCAGGAGAAGAAGAGGAAAGG	CCTCAGGAGAATAGGAGGAATGG	**.........*.*......	4	0.110194	0.131868	NC_037114.1	31633011	31633033	+	intron:XM_024378608.1
164rev	TTTCAGGAGAAGAAGAGGAAAGG	TATGAGGAGCAAAAGAGGAAAGG	.*.*.....*.*........	4	0.648306	0.131624	NC_037112.1	15648056	15648078	+	exon:XM_024374626.1
164rev	TTTCAGGAGAAGAAGAGGAAAGG	CTCCAGGAGAAGAGGAGGAGAGG	*.*..........*.....*	4	0.102465	0.131092	NW_020129039.1	241695	241717	+	exon:XM_024405080.1
164rev	TTTCAGGAGAAGAAGAGGAAAGG	CTCCAGGAGAAGAGGAGGAGAGG	*.*..........*.....*	4	0.102465	0.131092	NW_020129387.1	136790	136812	-	intergenic:XM_024406582.1-XM_024406579.1
164rev	TTTCAGGAGAAGAAGAGGAAAGG	TTGAATGAGAAGAGGAGGAAAGG	..**.*.......*......	4	0.127167	0.130994	NC_037108.1	9012541	9012563	+	intergenic:XM_024438225.1/XM_024438224.1/XM_024438226.1/XM_024438223.1-XM_024438226.1/XM_024438225.1/XM_024438224.1/XM_024438223.1
164rev	TTTCAGGAGAAGAAGAGGAAAGG	TGTCTGATGAAGAAGAGGAAGGG	.*..*.**............	4	0.932256	0.130909	NC_037102.1	12125369	12125391	+	intergenic:XM_024423071.1-XM_024423074.1/XM_024423072.1/XM_024423073.1
164rev	TTTCAGGAGAAGAAGAGGAAAGG	TGTCTGATGAAGAAGAGGAAGGG	.*..*.**............	4	0.932256	0.130909	NC_037119.1	11171979	11172001	+	intergenic:XM_024385801.1/XM_024385800.1/XM_024385799.1/XM_024385797.1/XM_024385798.1-XM_024385803.1/XM_024385804.1/XM_024385802.1
164rev	TTTCAGGAGAAGAAGAGGAAAGG	TGTCAGGAGGAGAGGAGGATTGG	.*.......*...*.....*	4	0.09571	0.130667	NW_020129328.1	132253	132275	-	intergenic:LOC112237758-XM_024406360.1
164rev	TTTCAGGAGAAGAAGAGGAAAGG	TTTCAGGAGAAAACAAGAAAAGG	...........*.**..*..	4	0.00525602	0.130317	NC_037098.1	51193223	51193245	-	intron:XM_024439098.1
164rev	TTTCAGGAGAAGAAGAGGAAAGG	TGTCTGGAGGAGAAGAGGAGAGG	.*..*....*.........*	4	0.642349	0.129768	NC_037108.1	68165531	68165553	+	intron:XM_024440302.1/XM_024440300.1/XM_024440299.1
164rev	TTTCAGGAGAAGAAGAGGAAAGG	GCTCAGCAGAAGAAGAGGACTGG	**....*............*	4	0.476356	0.128106	NC_037098.1	51505228	51505250	+	intergenic:XM_024383685.1/XM_024383677.1/XM_024383671.1/XM_024383667.1/XM_024383662.1/XM_024383657.1/XM_024383651.1/XM_024383646.1/XM_024383642.1-XM_024439110.1
164rev	TTTCAGGAGAAGAAGAGGAAAGG	TCACAGGAGAAGAACAGGAGAGG	.**...........*....*	4	0.184299	0.127687	NC_037114.1	16042113	16042135	+	intron:XM_024377998.1
164rev	TTTCAGGAGAAGAAGAGGAAAGG	TTTCACGAGAGGAAGAGGGGGGG	.....*....*.......**	4	0.0662982	0.127089	NW_020128993.1	202640	202662	+	intergenic:XM_024404792.1/XM_024404791.1-Gap
164rev	TTTCAGGAGAAGAAGAGGAAAGG	GAAAAGGAGAAGAAGAGGAAGAG	****................	4	0.257335	0.126217	NC_037108.1	50627967	50627989	-	intergenic:XM_024439712.1-XM_024440733.1
164rev	TTTCAGGAGAAGAAGAGGAAAGG	ATTAGGGAGAAGAAGAGGCATGG	*..**.............*.	4	0.526849	0.125445	NC_037105.1	77035283	77035305	-	intron:XM_024433145.1
164rev	TTTCAGGAGAAGAAGAGGAAAGG	TTTCAGAGGGTGAAGAGGAAGGG	......**.**.........	4	0.455581	0.125356	NW_020129856.1	179312	179334	+	intron:XM_024407638.1
164rev	TTTCAGGAGAAGAAGAGGAAAGG	TTTAAGGAGAAGAAGAAGCGTGG	...*............*.**	4	0.0800718	0.124351	NC_037116.1	27899062	27899084	-	exon:XM_024380471.1
164rev	TTTCAGGAGAAGAAGAGGAAAGG	TGTCAGAAGAGGAAGAGGACTGG	.*....*...*........*	4	0.264378	0.124091	NC_037097.1	21361439	21361461	-	intron:XM_024417045.1
164rev	TTTCAGGAGAAGAAGAGGAAAGG	GTGCAGCAGAAGAAGAGGGAAGG	*.*...*...........*.	4	0.3548	0.123302	NC_037115.1	613102	613124	-	intergenic:XR_002948680.1-XM_024378746.1
164rev	TTTCAGGAGAAGAAGAGGAAAGG	CTACAGGTGAAGAGGAGGAAGGG	*.*....*.....*......	4	0.220836	0.122449	NC_037105.1	71253452	71253474	-	intron:XM_024432806.1
164rev	TTTCAGGAGAAGAAGAGGAAAGG	TTTCCGAAGAAGGAGAGGGATGG	....*.*.....*.....*.	4	0.125155	0.122283	NC_037101.1	64431367	64431389	+	intron:XM_024421644.1
164rev	TTTCAGGAGAAGAAGAGGAAAGG	TTTCAAAAGGAGACGAGGAAAGG	.....**..*...*......	4	0.0773992	0.119048	NC_037098.1	14688282	14688304	+	intergenic:XR_002956025.1-XM_024444944.1/XM_024444940.1
164rev	TTTCAGGAGAAGAAGAGGAAAGG	TTTCTGGAGAGGGAGAGGAGAGG	....*.....*.*......*	4	0.141812	0.11788	NC_037114.1	17031137	17031159	-	intergenic:XM_024378024.1-XM_024377576.1
164rev	TTTCAGGAGAAGAAGAGGAAAGG	TGCCAGCAGAAGAAGAGCAAAGG	.**...*..........*..	4	0.20899	0.117857	NC_037105.1	5967662	5967684	+	intron:XM_024434195.1
164rev	TTTCAGGAGAAGAAGAGGAAAGG	TTTCAGGATAAAAAAATGAAAGG	........*..*..*.*...	4	0.0423366	0.117124	NC_037119.1	2543013	2543035	-	intergenic:XM_024385463.1-XM_024385466.1
164rev	TTTCAGGAGAAGAAGAGGAAAGG	CGTCAGGAGAAGAAGAGGCGTGG	**................**	4	0.219696	0.113915	NW_020129126.1	49588	49610	-	intergenic:XM_024405552.1-XM_024405546.1/XM_024405547.1
164rev	TTTCAGGAGAAGAAGAGGAAAGG	TGCAAGGAGAAGAAGAGGGAGGG	.***..............*.	4	0.491768	0.113684	NW_020128826.1	1672939	1672961	+	intergenic:LOC112234018-LOC112234006
164rev	TTTCAGGAGAAGAAGAGGAAAGG	TGCAAGGAGAAGAAGAGGGAGGG	.***..............*.	4	0.491768	0.113684	NC_037109.1	54653183	54653205	-	intergenic:LOC112265441-LOC112266119
164rev	TTTCAGGAGAAGAAGAGGAAAGG	TTTGAGGAAAGGAAGAGGTATGG	...*....*.*.......*.	4	0.169129	0.1125	NC_037099.1	62764304	62764326	-	intron:XM_024408239.1
164rev	TTTCAGGAGAAGAAGAGGAAAGG	TTTCATTAGGACAAGAGGAACGG	.....**..*.*........	4	0.255573	0.112045	NW_020142538.1	1072985	1073007	+	intron:XM_024414903.1
164rev	TTTCAGGAGAAGAAGAGGAAAGG	TTTCATTAGGACAAGAGGAACGG	.....**..*.*........	4	0.255573	0.112045	NC_037099.1	75129167	75129189	-	intron:XM_024410768.1
164rev	TTTCAGGAGAAGAAGAGGAAAGG	TTACAGGAGGAGAGGAGGATGGG	..*......*...*.....*	4	0.089337	0.111111	NW_020142656.1	130509	130531	+	intron:XM_024416449.1
164rev	TTTCAGGAGAAGAAGAGGAAAGG	CTGCAGGACAAGAAGAGCAAGGG	*.*.....*........*..	4	0.186959	0.10989	NC_037115.1	37148940	37148962	+	exon:LOC112218992
164rev	TTTCAGGAGAAGAAGAGGAAAGG	TTCCCGGGGAAGAAGAGAAAGGG	..*.*..*.........*..	4	0.305989	0.108791	NC_037127.1	9383315	9383337	-	intergenic:XM_024395301.1/XM_024395300.1/XM_024395299.1/XM_024395298.1/XM_024395297.1/XM_024395296.1-XM_024395299.1/XM_024395298.1
164rev	TTTCAGGAGAAGAAGAGGAAAGG	ATTCAGGAGATGGAGAGGTATGG	*.........*.*.....*.	4	0.113159	0.108052	NW_020129507.1	92954	92976	+	intron:XM_024406898.1/XM_024406897.1/XM_024406896.1/XM_024406894.1
164rev	TTTCAGGAGAAGAAGAGGAAAGG	TTTCGGTAGAAGAAGAGAGAGGG	....*.*..........**.	4	0.0633861	0.106813	NW_020128835.1	817024	817046	-	intergenic:XM_024402671.1-XM_024402673.1
164rev	TTTCAGGAGAAGAAGAGGAAAGG	TTTCGGTAGAAGAAGAGAGAGGG	....*.*..........**.	4	0.0633861	0.106813	NW_020128839.1	998604	998626	+	intergenic:XM_024402787.1-XM_024402788.1
164rev	TTTCAGGAGAAGAAGAGGAAAGG	TTTCAGGGGGAGAAGAGAGAGGG	.......*.*.......**.	4	0.0813545	0.105769	NC_037108.1	64164306	64164328	-	intergenic:XM_024440757.1-XM_024440142.1/XM_024440141.1/XM_024440140.1
164rev	TTTCAGGAGAAGAAGAGGAAAGG	TTTGAGGAGAGGATGAGGATGGG	...*......*..*.....*	4	0.0545994	0.104	NC_037116.1	17734258	17734280	+	intergenic:XM_024382023.1-LOC112219931
164rev	TTTCAGGAGAAGAAGAGGAAAGG	TTTACGGAGAGGAAGAGGGAGGG	...**.....*.......*.	4	0.276806	0.102632	NC_037112.1	17970099	17970121	-	intron:XM_024374706.1
164rev	TTTCAGGAGAAGAAGAGGAAAGG	ATTTATGAGAAGAAGGGGAAGGG	*..*.*.........*....	4	0.164762	0.102564	NC_037103.1	42444983	42445005	-	intron:XM_024426797.1/XM_024426796.1/XM_024426795.1/XM_024426794.1/XM_024426793.1/XM_024426792.1/XM_024426791.1/XM_024426789.1/XM_024426788.1
164rev	TTTCAGGAGAAGAAGAGGAAAGG	GTAGAGGAGAAGTAGAGGAACGG	*.**........*.......	4	0.573581	0.102484	NC_037124.1	38761547	38761569	+	intron:LOC112226418
164rev	TTTCAGGAGAAGAAGAGGAAAGG	TTTGAGGAAAACAAGAGGATGGG	...*....*..*.......*	4	0.198479	0.102101	NC_037110.1	4445640	4445662	-	intron:XM_024443878.1/XM_024443877.1/XM_024443876.1/XM_024443875.1/XM_024443874.1/XM_024443873.1/XM_024443871.1/XM_024443870.1/XM_024443869.1/XM_024443868.1
164rev	TTTCAGGAGAAGAAGAGGAAAGG	TCCGAGGAGGAGAAGAGGAAGGG	.***.....*..........	4	1.23951	0.102041	NW_020129709.1	142240	142262	-	intergenic:XM_024407324.1-Gap
164rev	TTTCAGGAGAAGAAGAGGAAAGG	TTTCAAGAGACTGAGAGGAAAGG	.....*....***.......	4	0.0872647	0.100334	NC_037098.1	19419788	19419810	-	intergenic:XM_024445893.1-XM_024445899.1/XM_024445896.1
164rev	TTTCAGGAGAAGAAGAGGAAAGG	TTTAAGAAGGAGACGAGGAAGGG	...*..*..*...*......	4	0.134098	0.100251	NC_037118.1	35107887	35107909	-	intron:XM_024385142.1
164rev	TTTCAGGAGAAGAAGAGGAAAGG	TTTGAGATGAAGAGGAGGAAGGG	...*..**.....*......	4	0.1456	0.1	NC_037127.1	19501592	19501614	-	intergenic:XM_024395180.1-LOC112229315
164rev	TTTCAGGAGAAGAAGAGGAAAGG	TTTGAGATGAAGAGGAGGAAGGG	...*..**.....*......	4	0.1456	0.1	NW_020128826.1	400103	400125	-	intergenic:XM_024401947.1-LOC112234017
164rev	TTTCAGGAGAAGAAGAGGAAAGG	TGTGAGGAGATGAAGAGGAGGGG	.*.*......*........*	4	0.387083	0.0988235	NW_020129492.1	21699	21721	+	intron:LOC112238251
164rev	TTTCAGGAGAAGAAGAGGAAAGG	TGTCAGGAGTAGAAGGGAAAAGG	.*.......*.....*.*..	4	0.0491605	0.0986773	NW_020129777.1	94385	94407	+	intron:XM_024407486.1
164rev	TTTCAGGAGAAGAAGAGGAAAGG	TGGGAGGAGAAGAGGAGGAAAGG	.***.........*......	4	0.220836	0.098	NC_037123.1	3003538	3003560	+	intergenic:XM_024390055.1-XM_024389916.1
164rev	TTTCAGGAGAAGAAGAGGAAAGG	TTTCAAGAGAAGATCAGTAAGGG	.....*.......**..*..	4	0.00711769	0.0969697	NC_037105.1	79020227	79020249	-	intergenic:XM_024433197.1-XM_024433200.1/XM_024433199.1
164rev	TTTCAGGAGAAGAAGAGGAAAGG	TTTCAAGAGAAAAAGGGGTAGGG	.....*.....*...*..*.	4	0.0242419	0.0966469	NC_037099.1	21714395	21714417	-	intergenic:XM_024398233.1/XM_024398237.1-XM_024398237.1/XM_024398233.1
164rev	TTTCAGGAGAAGAAGAGGAAAGG	TTTCAAGAGAAAAAGGGGTAGGG	.....*.....*...*..*.	4	0.0242419	0.0966469	NW_020142522.1	2797109	2797131	+	intergenic:XM_024414401.1/XM_024414400.1-XM_024414400.1/XM_024414401.1
164rev	TTTCAGGAGAAGAAGAGGAAAGG	TTGCATGAGAAGAAGAGGGGGGG	..*..*............**	4	0.124066	0.0955882	NC_037124.1	25293364	25293386	-	intron:XM_024391763.1
164rev	TTTCAGGAGAAGAAGAGGAAAGG	TGTGAGGTGAACAAGAGGAAGGG	.*.*...*...*........	4	0.703916	0.0952941	NW_020128824.1	259300	259322	-	intergenic:XM_024401770.1/XM_024401769.1-XM_024401806.1
164rev	TTTCAGGAGAAGAAGAGGAAAGG	TGTGAGGTGAACAAGAGGAAGGG	.*.*...*...*........	4	0.703916	0.0952941	NC_037118.1	3186090	3186112	-	intergenic:XM_024383742.1/XM_024383741.1-XM_024383535.1
164rev	TTTCAGGAGAAGAAGAGGAAAGG	TGAAGGGAGAAGAAGAGGAAGAG	.****...............	4	0.257335	0.0943158	NW_020130768.1	88869	88891	+	exon:XM_024408937.1
164rev	TTTCAGGAGAAGAAGAGGAAAGG	GTCAAGGAGAAGAACAGGAAGGG	*.**..........*.....	4	0.397208	0.0941484	NC_037109.1	74373206	74373228	+	intron:XM_024443661.1
164rev	TTTCAGGAGAAGAAGAGGAAAGG	TTTCAGGATAAAAACAGAAATGG	........*..*..*..*..	4	0.0225919	0.093986	NC_037107.1	41093544	41093566	-	intergenic:XR_002955277.1-XM_024437719.1
164rev	TTTCAGGAGAAGAAGAGGAAAGG	AAGAAGGAGAAGAAGAGGAAGAG	****................	4	0.257335	0.0923677	NC_037098.1	33216484	33216506	-	exon:XM_024377926.1
164rev	TTTCAGGAGAAGAAGAGGAAAGG	AAGAAGGAGAAGAAGAGGAAGAG	****................	4	0.257335	0.0923677	NW_020129030.1	289703	289725	+	intergenic:XM_024405021.1-XM_024405019.1
164rev	TTTCAGGAGAAGAAGAGGAAAGG	TTGTAGGAGAAGTAGAGGAGCGG	..**........*......*	4	0.25194	0.0917647	NC_037101.1	76939914	76939936	+	intergenic:XM_024422168.1-LOC112251266
164rev	TTTCAGGAGAAGAAGAGGAAAGG	TTGTAGGAGAAGTAGAGGAGCGG	..**........*......*	4	0.25194	0.0917647	NC_037101.1	73027122	73027144	+	intergenic:XM_024422023.1-LOC112251195
164rev	TTTCAGGAGAAGAAGAGGAAAGG	AGGAAGGAGAAGAAGAGGAAGAG	****................	4	0.257335	0.0916959	NC_037125.1	31958650	31958672	+	exon:XM_024393164.1
164rev	TTTCAGGAGAAGAAGAGGAAAGG	TGTTTGGAGAAGAAGAGGGAGGG	.*.**.............*.	4	0.49875	0.0916364	NC_037100.1	66723492	66723514	+	intergenic:XR_002953334.1/XR_002953333.1-XM_024419054.1
164rev	TTTCAGGAGAAGAAGAGGAAAGG	TTTCAGATGACGATGAGGAAGGG	......**..*..*......	4	0.0770929	0.0914286	NC_037126.1	2152174	2152196	+	exon:XM_024394965.1
164rev	TTTCAGGAGAAGAAGAGGAAAGG	GTTAAGGAGAAGTAGAGGGAAGG	*..*........*.....*.	4	0.20389	0.0906178	NC_037106.1	60673355	60673377	+	intron:XM_024434296.1
164rev	TTTCAGGAGAAGAAGAGGAAAGG	TATGAGGAGGATAAGAGGAAAGG	.*.*.....*.*........	4	0.648306	0.0904011	NC_037109.1	33155952	33155974	-	intron:XM_024441911.1
164rev	TTTCAGGAGAAGAAGAGGAAAGG	TTTGAGGAGAAAAAGAAGCAGGG	...*.......*....*.*.	4	0.0944732	0.0901149	NC_037101.1	50038315	50038337	+	intron:XM_024422521.1
164rev	TTTCAGGAGAAGAAGAGGAAAGG	TATCAGGACAAACAGAGGAAAGG	.*......*..**.......	4	0.166446	0.0895256	NC_037112.1	56104066	56104088	-	intron:XM_024374141.1
164rev	TTTCAGGAGAAGAAGAGGAAAGG	AGTCAGGGGGAGAAGAGGAAAAG	**.....*.*..........	4	0.263539	0.0887243	NW_020130330.1	22272	22294	+	intron:XM_024408431.1
164rev	TTTCAGGAGAAGAAGAGGAAAGG	CTTCAGGAAAAGCAGAGGAGAGG	*.......*...*......*	4	0.164916	0.0887092	NC_037111.1	35934098	35934120	-	intergenic:XM_024373872.1-XR_002948182.1
164rev	TTTCAGGAGAAGAAGAGGAAAGG	TGACAGGAGAGGAAGAGGACAGG	.**.......*........*	4	0.381664	0.0886364	NW_020130460.1	45683	45705	+	intron:XM_024408557.1
164rev	TTTCAGGAGAAGAAGAGGAAAGG	TTTCGGGTGAAGAAGAGGGGCGG	....*..*..........**	4	0.207979	0.0884874	NC_037101.1	77263030	77263052	-	intergenic:XM_024422174.1/XM_024422173.1-XM_024422175.1
164rev	TTTCAGGAGAAGAAGAGGAAAGG	GAGAAGGAGAAGAAGAGGAAGAG	****................	4	0.257335	0.0883517	NC_037104.1	16475069	16475091	-	intergenic:XM_024430656.1-XM_024428533.1
164rev	TTTCAGGAGAAGAAGAGGAAAGG	GAGAAGGAGAAGAAGAGGAAGAG	****................	4	0.257335	0.0883517	NC_037104.1	16478179	16478201	-	intergenic:XM_024430656.1-XM_024428533.1
164rev	TTTCAGGAGAAGAAGAGGAAAGG	GAGAAGGAGAAGAAGAGGAAGAG	****................	4	0.257335	0.0883517	NC_037104.1	16478134	16478156	-	intergenic:XM_024430656.1-XM_024428533.1
164rev	TTTCAGGAGAAGAAGAGGAAAGG	TGCCAGGAGAGGAAGAGGGATGG	.**.......*.......*.	4	0.272931	0.08775	NC_037109.1	20922464	20922486	+	intergenic:XM_024441408.1-XM_024441410.1/XM_024441409.1
164rev	TTTCAGGAGAAGAAGAGGAAAGG	CTACAGGAGAAGAAGAGACAGGG	*.*..............**.	4	0.101817	0.0876956	NC_037104.1	20265007	20265029	+	intron:LOC112255686
164rev	TTTCAGGAGAAGAAGAGGAAAGG	AATCAGGACAAGAAGGGGAAAGG	**......*......*....	4	0.166396	0.0876195	NC_037110.1	26698635	26698657	-	intergenic:XM_024444691.1-XM_024444689.1/XM_024444693.1/XM_024444691.1/XM_024444690.1
164rev	TTTCAGGAGAAGAAGAGGAAAGG	TTAGAGGAGAAGGAGAGGGAGGG	..**........*.....*.	4	0.190314	0.0873447	NC_037098.1	52956886	52956908	+	intron:XR_002955396.1
164rev	TTTCAGGAGAAGAAGAGGAAAGG	TGTCTGGTGAAGAAGAGTAAGGG	.*..*..*.........*..	4	0.310333	0.0872727	NC_037113.1	7795552	7795574	+	intergenic:LOC112216778-XM_024377439.1
164rev	TTTCAGGAGAAGAAGAGGAAAGG	TTTCTGGTGAAAAAGAGGATTGG	....*..*...*.......*	4	0.324843	0.0872727	NC_037104.1	15758035	15758057	-	intergenic:XM_024430626.1-LOC112256091
164rev	TTTCAGGAGAAGAAGAGGAAAGG	TTTCAGGATAAGAAAATAAATGG	........*.....*.**..	4	0.0176786	0.0868778	NC_037103.1	45127922	45127944	+	intron:XM_024426885.1/XM_024426884.1/XM_024426881.1/XM_024426880.1
164rev	TTTCAGGAGAAGAAGAGGAAAGG	TCCCTGGAGAGGAAGAGGAAGGG	.**.*.....*.........	4	0.782934	0.0868275	NC_037107.1	25244763	25244785	+	exon:LOC112262456
164rev	TTTCAGGAGAAGAAGAGGAAAGG	TGTCTGGAGAAGTAAAGGAATGG	.*..*.......*.*.....	4	0.155902	0.086246	NC_037100.1	42837095	42837117	-	intron:XM_024418157.1
164rev	TTTCAGGAGAAGAAGAGGAAAGG	GTTCAGGAGGAGCAGAGGAGTGG	*........*..*......*	4	0.248589	0.0855506	NC_037100.1	15038754	15038776	-	intergenic:XM_024417048.1/XM_024417046.1/XM_024417049.1/XM_024417047.1-XM_024417050.1/XR_002953200.1/XM_024417051.1
164rev	TTTCAGGAGAAGAAGAGGAAAGG	GTTCAGGAGGAGCAGAGGAGTGG	*........*..*......*	4	0.248589	0.0855506	NC_037100.1	10702996	10703018	-	intergenic:XM_024419287.1-XM_024419288.1
164rev	TTTCAGGAGAAGAAGAGGAAAGG	TTAAAGGGGAAGAAGGGGAAGGG	..**...*.......*....	4	0.254925	0.0848275	NC_037109.1	46020018	46020040	+	intergenic:XR_002955741.1-XM_024442407.1/XM_024442406.1
164rev	TTTCAGGAGAAGAAGAGGAAAGG	TTAAAGGAGAGGACGAGGAAGGG	..**......*..*......	4	0.116657	0.0837809	NW_020129141.1	168729	168751	-	intergenic:LOC112237033-Gap
164rev	TTTCAGGAGAAGAAGAGGAAAGG	CTTCAGATGAAGAAGAGGACAGG	*.....**...........*	4	0.476356	0.0834879	NC_037117.1	32588259	32588281	-	intergenic:XM_024383417.1-XM_024383418.1/XM_024383420.1/XM_024383419.1/XM_024383421.1
164rev	TTTCAGGAGAAGAAGAGGAAAGG	CTTCAGATGAAGAAGAGGACGGG	*.....**...........*	4	0.476356	0.0834879	NW_020129005.1	286081	286103	-	intergenic:XR_002951200.1/XM_024404860.1-Gap
164rev	TTTCAGGAGAAGAAGAGGAAAGG	CTTCAGATGAAGAAGAGGACGGG	*.....**...........*	4	0.476356	0.0834879	NW_020129005.1	286347	286369	-	intergenic:XR_002951200.1/XM_024404860.1-Gap
164rev	TTTCAGGAGAAGAAGAGGAAAGG	CTTCAGATGAAGAAGAGGACGGG	*.....**...........*	4	0.476356	0.0834879	NW_020129005.1	286132	286154	-	intergenic:XR_002951200.1/XM_024404860.1-Gap
164rev	TTTCAGGAGAAGAAGAGGAAAGG	CTTCAGATGAAGAAGAGGACGGG	*.....**...........*	4	0.476356	0.0834879	NW_020129005.1	286295	286317	-	intergenic:XR_002951200.1/XM_024404860.1-Gap
164rev	TTTCAGGAGAAGAAGAGGAAAGG	TCTCAGATGAAGAAGAGGACGGG	.*....**...........*	4	0.476356	0.0834879	NW_020129187.1	179352	179374	+	intergenic:XM_024405816.1/XM_024405815.1-XM_024405813.1
164rev	TTTCAGGAGAAGAAGAGGAAAGG	TTTCAGATGAAGAAGAAGCATGG	......**........*.*.	4	0.124508	0.0827586	NC_037129.1	8130481	8130503	-	intergenic:XM_024397196.1-XM_024397197.1
164rev	TTTCAGGAGAAGAAGAGGAAAGG	TTGCTGGAGAAGGAGAGAAATGG	..*.*.......*....*..	4	0.118418	0.0820918	NW_020142502.1	828476	828498	-	intergenic:XR_002952664.1-XM_024412867.1
164rev	TTTCAGGAGAAGAAGAGGAAAGG	TTTCAAGAGCAGGAGAGGGAGGG	.....*...*..*.....*.	4	0.102104	0.0815217	NC_037106.1	37174812	37174834	-	intron:XM_024435501.1/XM_024435500.1/XM_024435498.1/XM_024435497.1/XM_024435496.1/XM_024435495.1
164rev	TTTCAGGAGAAGAAGAGGAAAGG	TTTCAGAAAGAGAAGAGGACAGG	......*.**.........*	4	0.240915	0.0811688	NW_020142510.1	9076180	9076202	+	intergenic:XM_024413276.1-XM_024413380.1
164rev	TTTCAGGAGAAGAAGAGGAAAGG	TTTCAGAAAGAGAAGAGGACAGG	......*.**.........*	4	0.240915	0.0811688	NC_037101.1	37897832	37897854	+	intergenic:XM_024422708.1-XM_024420692.1
164rev	TTTCAGGAGAAGAAGAGGAAAGG	TTTCAGGTGAACAAAAGGGAGGG	.......*...*..*...*.	4	0.0594246	0.0800791	NC_037103.1	45556923	45556945	-	intron:XM_024426917.1/XM_024426915.1/XM_024426914.1
164rev	TTTCAGGAGAAGAAGAGGAAAGG	TTACAGGTGAAGAAGAGAGAGGG	..*....*.........**.	4	0.0963864	0.0794741	NC_037118.1	24473697	24473719	+	intergenic:XM_024384772.1-XM_024384773.1
164rev	TTTCAGGAGAAGAAGAGGAAAGG	CTTCAGTAAAAGAAGATGAATGG	*.....*.*.......*...	4	0.254387	0.0787172	NW_020129390.1	113429	113451	-	intergenic:XM_024406590.1-Gap
164rev	TTTCAGGAGAAGAAGAGGAAAGG	TTTTAGCTGCAGAAGAGGAAAGG	...*..**.*..........	4	0.858608	0.0785714	NC_037117.1	15055600	15055622	-	intergenic:XM_024383046.1-XR_002948965.1
164rev	TTTCAGGAGAAGAAGAGGAAAGG	AAAGAGGAGAAGAAGAGGAAGAG	****................	4	0.257335	0.0783476	NC_037103.1	42156866	42156888	+	intron:XM_024428282.1
164rev	TTTCAGGAGAAGAAGAGGAAAGG	TTTCAGTAGAAAATCAGGAAGGG	......*....*.**.....	4	0.0183156	0.0775758	NC_037101.1	30258950	30258972	+	intron:LOC112251494
164rev	TTTCAGGAGAAGAAGAGGAAAGG	GTTGAGGAGAAGCAGAGGAGAGG	*..*........*......*	4	0.269912	0.0769956	NW_020129138.1	68056	68078	-	intergenic:XM_024405636.1-XR_002951320.1
164rev	TTTCAGGAGAAGAAGAGGAAAGG	GTTGAGGAGAAGCAGAGGAGAGG	*..*........*......*	4	0.269912	0.0769956	NC_037108.1	17923198	17923220	-	exon:XR_002955405.1
164rev	TTTCAGGAGAAGAAGAGGAAAGG	GTTGAGGAGAAGCAGAGGAGAGG	*..*........*......*	4	0.269912	0.0769956	NW_020129138.1	69436	69458	-	exon:XR_002951320.1
164rev	TTTCAGGAGAAGAAGAGGAAAGG	GTTGAGGAGAAGCAGAGGAGAGG	*..*........*......*	4	0.269912	0.0769956	NW_020129138.1	67717	67739	-	intergenic:XM_024405636.1-XR_002951320.1
164rev	TTTCAGGAGAAGAAGAGGAAAGG	GTTGAGGAGAAGCAGAGGAGAGG	*..*........*......*	4	0.269912	0.0769956	NC_037108.1	17921047	17921069	-	intergenic:XM_024438503.1-XR_002955405.1
164rev	TTTCAGGAGAAGAAGAGGAAAGG	GTTGAGGAGAAGCAGAGGAGAGG	*..*........*......*	4	0.269912	0.0769956	NC_037108.1	17922181	17922203	-	intergenic:XM_024438503.1-XR_002955405.1
164rev	TTTCAGGAGAAGAAGAGGAAAGG	GTTGAGGAGAAGCAGAGGAGAGG	*..*........*......*	4	0.269912	0.0769956	NW_020129138.1	67635	67657	-	intergenic:XM_024405636.1-XR_002951320.1
164rev	TTTCAGGAGAAGAAGAGGAAAGG	GTTGAGGAGAAGCAGAGGAGAGG	*..*........*......*	4	0.269912	0.0769956	NC_037108.1	17922317	17922339	-	intergenic:XM_024438503.1-XR_002955405.1
164rev	TTTCAGGAGAAGAAGAGGAAAGG	GTTGAGGAGAAGCAGAGGAGAGG	*..*........*......*	4	0.269912	0.0769956	NC_037108.1	17920957	17920979	-	intergenic:XM_024438503.1-XR_002955405.1
164rev	TTTCAGGAGAAGAAGAGGAAAGG	GTTGAGGAGAAGCAGAGGAGAGG	*..*........*......*	4	0.269912	0.0769956	NC_037108.1	17920723	17920745	-	intergenic:XM_024438503.1-XR_002955405.1
164rev	TTTCAGGAGAAGAAGAGGAAAGG	GTTGAGGAGAAGCAGAGGAGAGG	*..*........*......*	4	0.269912	0.0769956	NC_037108.1	17921262	17921284	-	intergenic:XM_024438503.1-XR_002955405.1
164rev	TTTCAGGAGAAGAAGAGGAAAGG	GTTGAGGAGAAGCAGAGGAGAGG	*..*........*......*	4	0.269912	0.0769956	NW_020129138.1	67500	67522	-	intergenic:XM_024405636.1-XR_002951320.1
164rev	TTTCAGGAGAAGAAGAGGAAAGG	GTTGAGGAGAAGCAGAGGAGAGG	*..*........*......*	4	0.269912	0.0769956	NW_020129138.1	66961	66983	-	intergenic:XM_024405636.1-XR_002951320.1
164rev	TTTCAGGAGAAGAAGAGGAAAGG	GTTGAGGAGAAGCAGAGGAGAGG	*..*........*......*	4	0.269912	0.0769956	NC_037108.1	17921397	17921419	-	intergenic:XM_024438503.1-XR_002955405.1
164rev	TTTCAGGAGAAGAAGAGGAAAGG	GTTGAGGAGAAGCAGAGGAGAGG	*..*........*......*	4	0.269912	0.0769956	NC_037108.1	17921479	17921501	-	intergenic:XM_024438503.1-XR_002955405.1
164rev	TTTCAGGAGAAGAAGAGGAAAGG	GTTGAGGAGAAGCAGAGGAGAGG	*..*........*......*	4	0.269912	0.0769956	NC_037108.1	17921903	17921925	-	intergenic:XM_024438503.1-XR_002955405.1
164rev	TTTCAGGAGAAGAAGAGGAAAGG	GTTGAGGAGAAGCAGAGGAGAGG	*..*........*......*	4	0.269912	0.0769956	NW_020129138.1	66917	66939	-	intergenic:XM_024405636.1-XR_002951320.1
164rev	TTTCAGGAGAAGAAGAGGAAAGG	GTTGAGGAGAAGCAGAGGAGAGG	*..*........*......*	4	0.269912	0.0769956	NC_037108.1	17922137	17922159	-	intergenic:XM_024438503.1-XR_002955405.1
164rev	TTTCAGGAGAAGAAGAGGAAAGG	GTTGAGGAGAAGCAGAGGAGAGG	*..*........*......*	4	0.269912	0.0769956	NC_037108.1	17921818	17921840	-	intergenic:XM_024438503.1-XR_002955405.1
164rev	TTTCAGGAGAAGAAGAGGAAAGG	GTTGAGGAGAAGCAGAGGAGAGG	*..*........*......*	4	0.269912	0.0769956	NW_020129138.1	68555	68577	-	intergenic:XM_024405636.1-XR_002951320.1
164rev	TTTCAGGAGAAGAAGAGGAAAGG	GTTGAGGAGAAGCAGAGGAGAGG	*..*........*......*	4	0.269912	0.0769956	NW_020129138.1	68888	68910	-	intergenic:XM_024405636.1-XR_002951320.1
164rev	TTTCAGGAGAAGAAGAGGAAAGG	GTTGAGGAGAAGCAGAGGAGAGG	*..*........*......*	4	0.269912	0.0769956	NW_020129138.1	69348	69370	-	intron:XR_002951320.1
164rev	TTTCAGGAGAAGAAGAGGAAAGG	GTTGAGGAGAAGCAGAGGAGAGG	*..*........*......*	4	0.269912	0.0769956	NC_037108.1	17922093	17922115	-	intergenic:XM_024438503.1-XR_002955405.1
164rev	TTTCAGGAGAAGAAGAGGAAAGG	GTTGAGGAGAAGCAGAGGAGAGG	*..*........*......*	4	0.269912	0.0769956	NW_020129138.1	67544	67566	-	intergenic:XM_024405636.1-XR_002951320.1
164rev	TTTCAGGAGAAGAAGAGGAAAGG	GTTGAGGAGAAGCAGAGGAGAGG	*..*........*......*	4	0.269912	0.0769956	NW_020129138.1	68141	68163	-	intergenic:XM_024405636.1-XR_002951320.1
164rev	TTTCAGGAGAAGAAGAGGAAAGG	GTTGAGGAGAAGCAGAGGAGAGG	*..*........*......*	4	0.269912	0.0769956	NC_037108.1	17923110	17923132	-	intron:XR_002955405.1
164rev	TTTCAGGAGAAGAAGAGGAAAGG	GTTGAGGAGAAGCAGAGGAGAGG	*..*........*......*	4	0.269912	0.0769956	NW_020129138.1	67285	67307	-	intergenic:XM_024405636.1-XR_002951320.1
164rev	TTTCAGGAGAAGAAGAGGAAAGG	GTTGAGGAGAAGCAGAGGAGAGG	*..*........*......*	4	0.269912	0.0769956	NW_020129138.1	68331	68353	-	intergenic:XM_024405636.1-XR_002951320.1
164rev	TTTCAGGAGAAGAAGAGGAAAGG	GTTGAGGAGAAGCAGAGGAGAGG	*..*........*......*	4	0.269912	0.0769956	NW_020129138.1	67195	67217	-	intergenic:XM_024405636.1-XR_002951320.1
164rev	TTTCAGGAGAAGAAGAGGAAAGG	GTTGAGGAGAAGCAGAGGAGAGG	*..*........*......*	4	0.269912	0.0769956	NC_037108.1	17920679	17920701	-	intergenic:XM_024438503.1-XR_002955405.1
164rev	TTTCAGGAGAAGAAGAGGAAAGG	GTTGAGGAGAAGCAGAGGAGAGG	*..*........*......*	4	0.269912	0.0769956	NC_037108.1	17921306	17921328	-	intergenic:XM_024438503.1-XR_002955405.1
164rev	TTTCAGGAGAAGAAGAGGAAAGG	GTTGAGGAGAAGCAGAGGAGAGG	*..*........*......*	4	0.269912	0.0769956	NW_020129138.1	68511	68533	-	intergenic:XM_024405636.1-XR_002951320.1
164rev	TTTCAGGAGAAGAAGAGGAAAGG	GTTGAGGAGAAGCAGAGGAGAGG	*..*........*......*	4	0.269912	0.0769956	NC_037108.1	17922273	17922295	-	intergenic:XM_024438503.1-XR_002955405.1
164rev	TTTCAGGAGAAGAAGAGGAAAGG	GTTGAGGAGAAGCAGAGGAGAGG	*..*........*......*	4	0.269912	0.0769956	NW_020129138.1	68375	68397	-	intergenic:XM_024405636.1-XR_002951320.1
164rev	TTTCAGGAGAAGAAGAGGAAAGG	GTTGAGGAGAAGCAGAGGAGAGG	*..*........*......*	4	0.269912	0.0769956	NC_037108.1	17922650	17922672	-	intergenic:XM_024438503.1-XR_002955405.1
164rev	TTTCAGGAGAAGAAGAGGAAAGG	GTTGAGGAGAAGCAGAGGAGAGG	*..*........*......*	4	0.269912	0.0769956	NW_020129138.1	68419	68441	-	intergenic:XM_024405636.1-XR_002951320.1
164rev	TTTCAGGAGAAGAAGAGGAAAGG	ATCCAGGAGAAGAAGGAGAAAGG	*.*............**...	4	0.10338	0.0769231	NC_037109.1	40934690	40934712	+	intergenic:XM_024442154.1-XM_024442155.1
164rev	TTTCAGGAGAAGAAGAGGAAAGG	TGTCAGGAGAGGCAGAGTAAAGG	.*........*.*....*..	4	0.0666549	0.0766316	NC_037112.1	36702593	36702615	+	intergenic:XM_024374115.1-XM_024375173.1
164rev	TTTCAGGAGAAGAAGAGGAAAGG	TTTGAGGAGATCAAGAAGAAAGG	...*......**....*...	4	0.158025	0.0760181	NW_020142564.1	129640	129662	-	exon:XM_024415654.1/XM_024415653.1/XM_024415652.1/XM_024415651.1/XM_024415650.1
164rev	TTTCAGGAGAAGAAGAGGAAAGG	TTTGAGGAGATCAAGAAGAAAGG	...*......**....*...	4	0.158025	0.0760181	NW_020128835.1	753746	753768	+	exon:XM_024402668.1
164rev	TTTCAGGAGAAGAAGAGGAAAGG	TTTGAGGAGATCAAGAAGAAAGG	...*......**....*...	4	0.158025	0.0760181	NW_020128839.1	1061882	1061904	-	exon:XM_024402791.1
164rev	TTTCAGGAGAAGAAGAGGAAAGG	TTTCCGGAGAAGAGGAGGTTGGG	....*........*....**	4	0.0309888	0.0753846	NW_020130825.1	6441	6463	-	intergenic:Gap-XM_024408992.1
164rev	TTTCAGGAGAAGAAGAGGAAAGG	TTACAGGAGAAGAAAACCAATGG	..*...........*.**..	4	0.0315719	0.0753242	NC_037106.1	28182169	28182191	-	intron:XM_024434210.1
164rev	TTTCAGGAGAAGAAGAGGAAAGG	GAAGAGGAGAAGAAGAGGAAGAG	****................	4	0.257335	0.0749412	NW_020130282.1	49153	49175	+	intergenic:Gap-XM_024408328.1
164rev	TTTCAGGAGAAGAAGAGGAAAGG	GAAGAGGAGAAGAAGAGGAAGAG	****................	4	0.257335	0.0749412	NC_037103.1	22877059	22877081	-	intergenic:XM_024426231.1/XM_024426232.1/XM_024426230.1-XM_024426233.1
164rev	TTTCAGGAGAAGAAGAGGAAAGG	TTCCAGAAGAAGAAGATAAAAGG	..*...*.........**..	4	0.0804612	0.0741758	NW_020142747.1	24832	24854	+	intergenic:Gap-XM_024416871.1
164rev	TTTCAGGAGAAGAAGAGGAAAGG	TTCCAGAAGAAGAAGATAAAAGG	..*...*.........**..	4	0.0804612	0.0741758	NW_020131332.1	31877	31899	+	intergenic:XM_024409427.1-XM_024409428.1
164rev	TTTCAGGAGAAGAAGAGGAAAGG	TATGAGGAGAAGAGGAGGGAGGG	.*.*.........*....*.	4	0.0743137	0.0740385	NW_020129703.1	75034	75056	-	intron:LOC112238768
164rev	TTTCAGGAGAAGAAGAGGAAAGG	TGTCAGGACAGGAAGATGAAGGG	.*......*.*.....*...	4	0.206713	0.0735	NC_037104.1	65399278	65399300	+	intergenic:XM_024428626.1-XM_024430438.1
164rev	TTTCAGGAGAAGAAGAGGAAAGG	TTTGAGGAGACCAAGAGAAAAGG	...*......**.....*..	4	0.080449	0.0733032	NC_037105.1	25959323	25959345	-	exon:XM_024431588.1
164rev	TTTCAGGAGAAGAAGAGGAAAGG	TATAAGGAGAAGATGGGGAAGGG	.*.*.........*.*....	4	0.0385231	0.0730821	NC_037129.1	30476892	30476914	-	intergenic:XR_002950436.1-XM_024398013.1
164rev	TTTCAGGAGAAGAAGAGGAAAGG	GTGGAGGAGAAGTAGAGGAAAGG	*.**........*.......	4	0.573581	0.0717391	NC_037105.1	14462721	14462743	+	intergenic:XM_024431150.1/XM_024431149.1/XM_024431148.1/XM_024431147.1/XM_024431146.1-XM_024431151.1
164rev	TTTCAGGAGAAGAAGAGGAAAGG	TTTCATGGGAAGCAGAGAAATGG	.....*.*....*....*..	4	0.0689809	0.0712551	NC_037100.1	68721002	68721024	+	intergenic:XM_024419120.1-XM_024419118.1
164rev	TTTCAGGAGAAGAAGAGGAAAGG	TTGCAACAGAAGAAGAGGCAGGG	..*..**...........*.	4	0.203206	0.0711207	NC_037104.1	3619463	3619485	+	intron:XM_024428714.1/XM_024428713.1
164rev	TTTCAGGAGAAGAAGAGGAAAGG	TTACAGGGAAAGCAGAGGAACGG	..*....**...*.......	4	0.333568	0.0708915	NC_037129.1	7785573	7785595	-	exon:XM_024398241.1
164rev	TTTCAGGAGAAGAAGAGGAAAGG	TGTCTGGTGAAGAAGAGGTATGG	.*..*..*..........*.	4	0.49875	0.0704895	NC_037128.1	8710916	8710938	+	exon:XM_024396617.1
164rev	TTTCAGGAGAAGAAGAGGAAAGG	TTTCAGAAGCAGAACAGGAGGGG	......*..*....*....*	4	0.105671	0.0695187	NC_037104.1	28551468	28551490	-	intron:LOC112255706
164rev	TTTCAGGAGAAGAAGAGGAAAGG	AGCCAGGAGAAGAAGGGGAAAGG	***............*....	4	0.268521	0.0692308	NW_020131385.1	22150	22172	+	intron:LOC112241346
164rev	TTTCAGGAGAAGAAGAGGAAAGG	TTGCAGGAGAGAAAGAGGACAGG	..*.......**.......*	4	0.177764	0.0689394	NC_037124.1	211574	211596	-	intron:XM_024390867.1/XM_024390866.1/XM_024390865.1
164rev	TTTCAGGAGAAGAAGAGGAAAGG	TGGCAGGAGAGGAAGATGAATGG	.**.......*.....*...	4	0.333582	0.06825	NC_037122.1	22829381	22829403	-	intron:XM_024388586.1
164rev	TTTCAGGAGAAGAAGAGGAAAGG	TTACACGAGAAGTGGAGGAAAGG	..*..*......**......	4	0.0492136	0.0681818	NC_037105.1	43925844	43925866	+	intergenic:XM_024432150.1/XM_024432148.1/XM_024432146.1/XM_024432145.1/XM_024432144.1-XM_024432149.1/XM_024432146.1/XM_024432145.1/XM_024432144.1/XM_024432148.1
164rev	TTTCAGGAGAAGAAGAGGAAAGG	TTACACGAGAAGTGGAGGAAAGG	..*..*......**......	4	0.0492136	0.0681818	NC_037105.1	56152077	56152099	+	intergenic:XM_024432417.1/XM_024432415.1/XM_024432414.1/XM_024432413.1/XM_024432412.1-XM_024432416.1/XM_024432414.1/XM_024432413.1/XM_024432412.1/XM_024432415.1
164rev	TTTCAGGAGAAGAAGAGGAAAGG	CCAGAGGAGAAGAAGAGGAAGAG	****................	4	0.257335	0.0680272	NC_037121.1	17626264	17626286	+	intron:XM_024387862.1/XM_024387861.1
164rev	TTTCAGGAGAAGAAGAGGAAAGG	CCAGAGGAGAAGAAGAGGAAGAG	****................	4	0.257335	0.0680272	NW_020128818.1	1098667	1098689	+	intron:XM_024401440.1/XM_024401439.1
164rev	TTTCAGGAGAAGAAGAGGAAAGG	TGGAAGGAGAAGAAGGGGAAAGG	.***...........*....	4	0.254925	0.0680162	NW_020131289.1	2230	2252	+	intergenic:Gap-LOC112241269
164rev	TTTCAGGAGAAGAAGAGGAAAGG	TTTGAGGAGGAGGAGAGGGATGG	...*.....*..*.....*.	4	0.177768	0.0679348	NC_037118.1	13421984	13422006	+	intron:XM_024383649.1
164rev	TTTCAGGAGAAGAAGAGGAAAGG	TTTTTGGAGCAGAAGAGAAAGGG	...**....*.......*..	4	0.271345	0.0671329	NC_037106.1	3087020	3087042	-	intergenic:XM_024436342.1-XM_024434381.1
164rev	TTTCAGGAGAAGAAGAGGAAAGG	ATTCAGGAGCTGGAGAGGAAGGG	*........**.*.......	4	0.297351	0.0668896	NC_037101.1	56848748	56848770	+	intron:XM_024421330.1
164rev	TTTCAGGAGAAGAAGAGGAAAGG	TTTTGGGAGATGAAGAGGGAAGG	...**.....*.......*.	4	0.276806	0.0664615	NW_020130252.1	87179	87201	+	intergenic:LOC112239914-XM_024408296.1
164rev	TTTCAGGAGAAGAAGAGGAAAGG	GACCAGGGGAAGAAGAGGAACAG	***....*............	4	0.269167	0.0659482	NW_020129869.1	71624	71646	+	intergenic:XM_024407660.1-Gap
164rev	TTTCAGGAGAAGAAGAGGAAAGG	GTTCATGAGAAGAACAGGGAGGG	*....*........*...*.	4	0.0854232	0.0652174	NC_037101.1	45334769	45334791	+	intron:LOC112250602
164rev	TTTCAGGAGAAGAAGAGGAAAGG	GTTCATGAGAAGAACAGGGAGGG	*....*........*...*.	4	0.0854232	0.0652174	NC_037101.1	28231052	28231074	+	intron:LOC112250319
164rev	TTTCAGGAGAAGAAGAGGAAAGG	GTTCATGAGAAGAACAGGGAGGG	*....*........*...*.	4	0.0854232	0.0652174	NW_020128811.1	2491300	2491322	+	intron:LOC112232980
164rev	TTTCAGGAGAAGAAGAGGAAAGG	TTTGAGGAGAGGACGAAGAACGG	...*......*..*..*...	4	0.0478571	0.065	NC_037116.1	41053820	41053842	-	exon:XM_024381024.1/XM_024381022.1/XM_024381023.1/XM_024381021.1/XM_024381020.1/XM_024381019.1
164rev	TTTCAGGAGAAGAAGAGGAAAGG	TTGGAGGAGGAGAGGAGGAAGGG	..**.....*...*......	4	0.193588	0.0648148	NW_020132524.1	15743	15765	+	intergenic:XM_024410062.1-Gap
164rev	TTTCAGGAGAAGAAGAGGAAAGG	TTTCAGAAGCAAAAGAGGCATGG	......*..*.*......*.	4	0.146542	0.0643678	NC_037105.1	68642905	68642927	-	intron:XM_024432694.1/XM_024432693.1/XM_024432692.1
164rev	TTTCAGGAGAAGAAGAGGAAAGG	TTTCAGAAGCAAAAGAGGCATGG	......*..*.*......*.	4	0.146542	0.0643678	NW_020142537.1	2794256	2794278	-	intron:XM_024414795.1/XM_024414794.1/XM_024414793.1
164rev	TTTCAGGAGAAGAAGAGGAAAGG	AAGCAGGAGGAGAAGAGGAAGAG	***......*..........	4	0.25985	0.060937	NC_037123.1	1989697	1989719	-	intergenic:XM_024389912.1-XM_024390033.1
164rev	TTTCAGGAGAAGAAGAGGAAAGG	TTTCATGAGAAGAAAATGGATGG	.....*........*.*.*.	4	0.0295575	0.0588235	NC_037101.1	47038345	47038367	+	intron:XM_024420906.1/XM_024420905.1/XM_024420904.1
164rev	TTTCAGGAGAAGAAGAGGAAAGG	TTTCAGTAGAGGAAGAGGCGAGG	......*...*.......**	4	0.0748457	0.0587656	NW_020129125.1	855377	855399	+	intergenic:LOC112236890-XM_024405493.1
164rev	TTTCAGGAGAAGAAGAGGAAAGG	TTTCAGTAGAGGAAGAGGCGAGG	......*...*.......**	4	0.0748457	0.0587656	NW_020129125.1	55293	55315	-	intergenic:XM_024405532.1-XM_024405519.1
164rev	TTTCAGGAGAAGAAGAGGAAAGG	TTTGTGGAGAAGAGGAGAAAGGG	...**........*...*..	4	0.0438984	0.0587413	NC_037129.1	16149049	16149071	-	intergenic:XR_002950399.1/XR_002950400.1-XR_002950397.1
164rev	TTTCAGGAGAAGAAGAGGAAAGG	TTTCAGGAGAAGAACAGTTTGGG	..............*..***	4	0.00900388	0.0587413	NC_037097.1	13673493	13673515	+	intron:XM_024396321.1/XM_024396270.1/XM_024396198.1/XM_024396119.1
164rev	TTTCAGGAGAAGAAGAGGAAAGG	TGTGAGGAGAGGACGAGGAAGGG	.*.*......*..*......	4	0.124304	0.0585	NC_037108.1	58045305	58045327	-	intergenic:XM_024439967.1-LOC112264177
164rev	TTTCAGGAGAAGAAGAGGAAAGG	TTTCAGGAGGAGAGGAGGGTAGG	.........*...*....**	4	0.0257898	0.0583333	NC_037110.1	46096546	46096568	-	intergenic:XM_024445502.1-XM_024445705.1
164rev	TTTCAGGAGAAGAAGAGGAAAGG	TATGGGGGGAAGAAGAGGAAGAG	.*.**..*............	4	0.272989	0.0579145	NC_037129.1	35827958	35827980	-	exon:XM_024396958.1
164rev	TTTCAGGAGAAGAAGAGGAAAGG	GGTGAGGAGGAGAAGAGGAATAG	**.*.....*..........	4	0.263539	0.0578637	NC_037098.1	56286705	56286727	-	intergenic:XM_024439337.1-XM_024438473.1
164rev	TTTCAGGAGAAGAAGAGGAAAGG	TTCCAGAAGAAGGAGAGGCAGGG	..*...*.....*.....*.	4	0.129984	0.0578282	NC_037099.1	60200080	60200102	-	exon:XM_024407639.1/XM_024407636.1
164rev	TTTCAGGAGAAGAAGAGGAAAGG	GCTCTGGAGAAGAAGGGGAATGG	**..*..........*....	4	0.272333	0.057334	NC_037100.1	23798209	23798231	+	intergenic:XM_024417427.1-XM_024417431.1/XM_024417430.1/XM_024417429.1/XM_024417428.1
164rev	TTTCAGGAGAAGAAGAGGAAAGG	AGACTGGAGAAGAAGAGGAAGAG	***.*...............	4	0.257335	0.0565657	NC_037110.1	3881970	3881992	+	intergenic:XM_024443837.1-LOC112266403
164rev	TTTCAGGAGAAGAAGAGGAAAGG	AGACTGGAGAAGAAGAGGAAGAG	***.*...............	4	0.257335	0.0565657	NC_037110.1	4129837	4129859	+	intron:XM_024445872.1
164rev	TTTCAGGAGAAGAAGAGGAAAGG	TTTGGGGAGCAGAGGAGGAAGGG	...**....*...*......	4	0.196337	0.056	NW_020131011.1	79286	79308	+	intergenic:XR_002952152.1-XM_024409158.1
164rev	TTTCAGGAGAAGAAGAGGAAAGG	TTTGGGGAGCAGAGGAGGAAGGG	...**....*...*......	4	0.196337	0.056	NC_037108.1	73631720	73631742	+	intergenic:XR_002955596.1-XM_024440795.1
164rev	TTTCAGGAGAAGAAGAGGAAAGG	TTGCAGCTGAAGAAGAGGGAGGG	..*...**..........*.	4	0.335877	0.0552455	NC_037102.1	76173961	76173983	-	exon:XM_024425223.1
164rev	TTTCAGGAGAAGAAGAGGAAAGG	TTTCAGGGGGAGGAGAGGCATGG	.......*.*..*.....*.	4	0.160634	0.0549725	NC_037107.1	42364149	42364171	-	intergenic:XM_024437755.1/XM_024437754.1/XM_024437757.1/XM_024437756.1/XM_024437753.1-XM_024437757.1/XM_024437756.1/XM_024437755.1/XM_024437754.1/XM_024437753.1
164rev	TTTCAGGAGAAGAAGAGGAAAGG	AAGGAGGAGAAGAAGAGGAACAG	****................	4	0.257335	0.0548433	NW_020128856.1	66039	66061	-	intergenic:Gap-XM_024403256.1
164rev	TTTCAGGAGAAGAAGAGGAAAGG	TTTCAGGAGGAGAACAGTTACGG	.........*....*..**.	4	0.021803	0.0543901	NW_020130703.1	36502	36524	-	intergenic:XM_024408852.1-Gap
164rev	TTTCAGGAGAAGAAGAGGAAAGG	ATTAAGGAGAAGAACACGAAGGG	*..*..........*.*...	4	0.163368	0.0540388	NC_037124.1	32033024	32033046	+	intron:XM_024392002.1/XM_024392000.1
164rev	TTTCAGGAGAAGAAGAGGAAAGG	TCTCAGGAAAAGAGGAGGCAGGG	.*......*....*....*.	4	0.0454057	0.053202	NC_037097.1	13772875	13772897	+	intron:XM_024396321.1/XM_024396270.1/XM_024396198.1/XM_024396119.1
164rev	TTTCAGGAGAAGAAGAGGAAAGG	AGCCAGGAGGAGAAGAGGAAGAG	***......*..........	4	0.25985	0.0518519	NC_037115.1	1355151	1355173	+	intergenic:XM_024378762.1/XM_024378761.1-XM_024378764.1/XM_024378763.1
164rev	TTTCAGGAGAAGAAGAGGAAAGG	TTTCAGCAGGAGGAGAGGCAGGG	......*..*..*.....*.	4	0.115268	0.0515367	NC_037125.1	6302635	6302657	+	intergenic:XM_024392324.1-XM_024392441.1
164rev	TTTCAGGAGAAGAAGAGGAAAGG	TTTGAGAAGAACAAGGGGAAAGG	...*..*....*...*....	4	0.0868802	0.050905	NC_037120.1	20721339	20721361	+	exon:XM_024387049.1
164rev	TTTCAGGAGAAGAAGAGGAAAGG	CTTCAGGAGAAGAGGAGGCTAGG	*............*....**	4	0.0327347	0.0496552	NW_020131632.1	20487	20509	-	intron:XM_024409667.1
164rev	TTTCAGGAGAAGAAGAGGAAAGG	TTGCAGGAGAAGAGGAAGACAGG	..*..........*..*..*	4	0.037345	0.0494949	NC_037101.1	1779355	1779377	+	intergenic:XR_002953450.1-XM_024419588.1
164rev	TTTCAGGAGAAGAAGAGGAAAGG	TTTTGGGAGAAGAAGAGGGCAGG	...**.............**	4	0.207979	0.0490909	NW_020129050.1	120604	120626	+	intergenic:XR_002951247.1-XM_024405137.1
164rev	TTTCAGGAGAAGAAGAGGAAAGG	TTTTAGGAAAAGAAGATGGATGG	...*....*.......*.*.	4	0.117323	0.0482143	NC_037107.1	15729870	15729892	-	intergenic:XM_024436872.1-XM_024436874.1
164rev	TTTCAGGAGAAGAAGAGGAAAGG	ATGAAGGTGAAGAAGAGGAATAG	*.**...*............	4	0.269167	0.0467836	NC_037102.1	9361228	9361250	-	intergenic:XM_024422957.1-XM_024422961.1/XM_024422960.1
164rev	TTTCAGGAGAAGAAGAGGAAAGG	ATGAAGGTGAAGAAGAGGAATAG	*.**...*............	4	0.269167	0.0467836	NW_020142542.1	2487861	2487883	-	intergenic:XM_024415190.1-XM_024415198.1/XM_024415196.1
164rev	TTTCAGGAGAAGAAGAGGAAAGG	TTTCTGGAACAGAAGAGGATGGG	....*...**.........*	4	0.371543	0.0467532	NW_020142582.1	47265	47287	-	intergenic:XM_024415894.1/XM_024415893.1-Gap
164rev	TTTCAGGAGAAGAAGAGGAAAGG	GTTCTGGAGAAGATGATGAAGGG	*...*........*..*...	4	0.0908279	0.0463768	NC_037122.1	32661520	32661542	+	exon:XM_024388475.1
164rev	TTTCAGGAGAAGAAGAGGAAAGG	TGATTGGAGAAGAAGAGGAAGAG	.****...............	4	0.257335	0.0452525	NC_037118.1	33931441	33931463	+	intron:XM_024385110.1
164rev	TTTCAGGAGAAGAAGAGGAAAGG	GTTCAGGAGATGGAGACGAATGG	*.........*.*...*...	4	0.130929	0.0451633	NC_037098.1	24367399	24367421	-	intron:XM_024385496.1
164rev	TTTCAGGAGAAGAAGAGGAAAGG	TGTCAGGAGCAGCAGAGGAGGGG	.*.......*..*......*	4	0.248589	0.0450774	NW_020130452.1	20528	20550	+	intergenic:Gap-XM_024408551.1
164rev	TTTCAGGAGAAGAAGAGGAAAGG	TTCCAGGAGAGGCAGAGGAGGGG	..*.......*.*......*	4	0.139826	0.0448474	NC_037099.1	17632243	17632265	+	intron:XM_024396632.1
164rev	TTTCAGGAGAAGAAGAGGAAAGG	TTTCTGGTGAAGAAGAGGGGCGG	....*..*..........**	4	0.207979	0.0446906	NC_037125.1	6587121	6587143	-	intergenic:XR_002949907.1/XM_024392448.1/XM_024392447.1/XM_024392446.1-XM_024392452.1
164rev	TTTCAGGAGAAGAAGAGGAAAGG	TTTGAGGAGAAGAGGATGAGAGG	...*.........*..*..*	4	0.0378752	0.0446078	NC_037106.1	23201099	23201121	+	intergenic:XM_024435014.1/XM_024435013.1-XM_024435015.1
164rev	TTTCAGGAGAAGAAGAGGAAAGG	TTTCAGGAGTTGAACAGGATAGG	.........**...*....*	4	0.0817295	0.0444262	NC_037104.1	9881932	9881954	-	intron:XM_024428945.1
164rev	TTTCAGGAGAAGAAGAGGAAAGG	TTTCAGAAGGAGCAGAGGGAGGG	......*..*..*.....*.	4	0.115268	0.0438596	NW_020129262.1	14094	14116	+	intergenic:LOC112237507-XM_024406108.1/XM_024406107.1/XM_024406106.1/XM_024406105.1/XM_024406104.1
164rev	TTTCAGGAGAAGAAGAGGAAAGG	TATGAGGAGCTGAAGAGGAAAGG	.*.*.....**.........	4	0.731321	0.0433925	NC_037123.1	17985786	17985808	-	exon:XM_024390741.1
164rev	TTTCAGGAGAAGAAGAGGAAAGG	TATGAGGAGCTGAAGAGGAAAGG	.*.*.....**.........	4	0.731321	0.0433925	NC_037121.1	20820002	20820024	+	exon:XM_024387994.1/XM_024387993.1/XM_024387992.1/XM_024387991.1/XM_024387990.1
164rev	TTTCAGGAGAAGAAGAGGAAAGG	TTAAAGGAGCAGACGAGGAACGG	..**.....*...*......	4	0.193588	0.0429646	NC_037100.1	61112909	61112931	+	intergenic:XM_024418765.1-XM_024418760.1
164rev	TTTCAGGAGAAGAAGAGGAAAGG	TTCCAGGAGTAGCTGAGGAATGG	..*......*..**......	4	0.0749185	0.0424591	NC_037104.1	33289494	33289516	-	intergenic:XM_024429616.1/XM_024429615.1/XM_024429614.1/XM_024429612.1-XM_024429617.1
164rev	TTTCAGGAGAAGAAGAGGAAAGG	TTTCTGGAGAAGAGGAGTGATGG	....*........*...**.	4	0.013828	0.0424242	NC_037104.1	27800267	27800289	-	intergenic:XM_024429498.1-XM_024429496.1
164rev	TTTCAGGAGAAGAAGAGGAAAGG	TTTAAGGAGATGTAGAGGTAGGG	...*......*.*.....*.	4	0.107124	0.0418561	NW_020131576.1	1877	1899	-	intergenic:Gap-XR_002952317.1
164rev	TTTCAGGAGAAGAAGAGGAAAGG	TTCCAGGGGAAGAAGGGAAAAGG	..*....*.......*.*..	4	0.0526301	0.0418428	NC_037107.1	31167950	31167972	+	exon:XM_024437482.1
164rev	TTTCAGGAGAAGAAGAGGAAAGG	TCTCTGGAGAAGATGATGAAGGG	.*..*........*..*...	4	0.0908279	0.0415584	NC_037129.1	25414776	25414798	+	intron:XM_024397721.1/XM_024397720.1
164rev	TTTCAGGAGAAGAAGAGGAAAGG	TTTCATGAGATGTAGAGTAATGG	.....*....*.*....*..	4	0.0382844	0.0410256	NC_037114.1	7846222	7846244	+	intergenic:XM_024377725.1/XM_024377724.1/XM_024377723.1-XR_002948551.1
164rev	TTTCAGGAGAAGAAGAGGAAAGG	TAGGAGGAGAAGAAGGGGAAAGG	.***...........*....	4	0.254925	0.0406805	NW_020128857.1	560170	560192	-	intergenic:XM_024403273.1-XM_024403275.1
164rev	TTTCAGGAGAAGAAGAGGAAAGG	TTACAGGAGATGAAGACGAGTGG	..*.......*.....*..*	4	0.139104	0.0395452	NW_020131426.1	40000	40022	+	intergenic:XM_024409488.1-XR_002952268.1
164rev	TTTCAGGAGAAGAAGAGGAAAGG	TTTCAGGAGCAGGACAGTAAAGG	.........*..*.*..*..	4	0.025555	0.0395257	NW_020128980.1	197942	197964	-	intergenic:XM_024404696.1-XM_024404697.1
164rev	TTTCAGGAGAAGAAGAGGAAAGG	TTTGTGGAGGAGAAGAGGGATGG	...**....*........*.	4	0.459349	0.0378788	NW_020129472.1	85500	85522	+	intron:XM_024406767.1
164rev	TTTCAGGAGAAGAAGAGGAAAGG	TATCAGGAGATGAAGAGACAAGG	.*........*......**.	4	0.054254	0.0372922	NC_037115.1	7568386	7568408	+	intron:XM_024380386.1
164rev	TTTCAGGAGAAGAAGAGGAAAGG	TCCCTGGAGAAGAACAGGAAAGG	.**.*.........*.....	4	0.397208	0.0364311	NC_037109.1	32228789	32228811	+	intergenic:XM_024441888.1/XM_024441887.1-XM_024441885.1
164rev	TTTCAGGAGAAGAAGAGGAAAGG	TTTGGGGAGAAGAAGAGCCATGG	...**............**.	4	0.097755	0.035468	NC_037110.1	16808950	16808972	-	exon:XM_024445625.1
164rev	TTTCAGGAGAAGAAGAGGAAAGG	TTTCTGGAGGAGAGGAGGGAGGG	....*....*...*....*.	4	0.0649775	0.0353535	NW_020142728.1	255908	255930	+	intergenic:XM_024416794.1-XM_024416796.1
164rev	TTTCAGGAGAAGAAGAGGAAAGG	GATGAGGAGCAGAAGAGGAAAAG	**.*.....*..........	4	0.263539	0.0349725	NC_037103.1	17984956	17984978	-	intergenic:LOC112255185-XM_024426128.1
164rev	TTTCAGGAGAAGAAGAGGAAAGG	GATGAGGAGCAGAAGAGGAAAAG	**.*.....*..........	4	0.263539	0.0349725	NC_037110.1	9779996	9780018	+	intergenic:XM_024444093.1-LOC112267723
164rev	TTTCAGGAGAAGAAGAGGAAAGG	TCCCCGGGGAAGAAGAGGAAGAG	.**.*..*............	4	0.269167	0.0349206	NC_037110.1	43161132	43161154	-	intron:LOC112267439
164rev	TTTCAGGAGAAGAAGAGGAAAGG	TTTCAGGATAAAAACATGAATGG	........*..*..*.*...	4	0.0423366	0.0339394	NW_020128969.1	173173	173195	-	intron:XM_024404601.1
164rev	TTTCAGGAGAAGAAGAGGAAAGG	TTTCAGGATAAAAACATGAACGG	........*..*..*.*...	4	0.0423366	0.0339394	NC_037099.1	45369964	45369986	-	intron:XM_024403983.1
164rev	TTTCAGGAGAAGAAGAGGAAAGG	TTTCAGGATAAAAACATGAACGG	........*..*..*.*...	4	0.0423366	0.0339394	NW_020128828.1	7162	7184	-	intergenic:Gap-LOC112234155
164rev	TTTCAGGAGAAGAAGAGGAAAGG	TTTCAGAAGAAGTAGACCAATGG	......*.....*...**..	4	0.0285367	0.0336134	NW_020129997.1	60743	60765	-	intergenic:XM_024407890.1-Gap
164rev	TTTCAGGAGAAGAAGAGGAAAGG	GGAAAGGAGAAGAAGAGGAAGGA	****................	4	0.257335	0.0335622	NC_037114.1	23043842	23043864	+	intron:XM_024377597.1
164rev	TTTCAGGAGAAGAAGAGGAAAGG	GGAAAGGAGAAGAAGAGGAAGGA	****................	4	0.257335	0.0335622	NC_037114.1	25739925	25739947	+	intron:XM_024377603.1
164rev	TTTCAGGAGAAGAAGAGGAAAGG	TTTGAGGATAAGAAGAGGCTTGG	...*....*.........**	4	0.127075	0.0331034	NC_037103.1	79640981	79641003	-	exon:XM_024428074.1
164rev	TTTCAGGAGAAGAAGAGGAAAGG	TGGCAGGAGATGAAGATGAAGGG	.**.......*.....*...	4	0.333582	0.0323077	NC_037127.1	6366007	6366029	+	intron:XM_024395057.1
164rev	TTTCAGGAGAAGAAGAGGAAAGG	TTGGAGGAGAACAAGACGAAGGG	..**.......*....*...	4	0.280743	0.0311419	NC_037121.1	31984094	31984116	+	intron:XM_024388286.1/XM_024388285.1/XM_024388284.1/XM_024388283.1/XM_024388282.1/XM_024388281.1/XM_024388280.1/XM_024388279.1/XM_024388278.1/XM_024388277.1/XM_024388276.1
164rev	TTTCAGGAGAAGAAGAGGAAAGG	ATCGAGGAGGAGAAGAGGAAGAG	*.**.....*..........	4	0.25985	0.0308642	NC_037101.1	80955221	80955243	+	exon:XM_024422243.1/XM_024422244.1
164rev	TTTCAGGAGAAGAAGAGGAAAGG	CTGGAGGAGGAGAAGAGGAAAAG	*.**.....*..........	4	0.25985	0.0308642	NC_037107.1	15295469	15295491	-	exon:XM_024438083.1
164rev	TTTCAGGAGAAGAAGAGGAAAGG	TTCCAGGAGAAGGATAGGAGGGG	..*.........*.*....*	4	0.0675198	0.030534	NC_037097.1	92646427	92646449	+	intergenic:LOC112261463-LOC112261469
164rev	TTTCAGGAGAAGAAGAGGAAAGG	TTCCTGGAGAAGAAAAGGCACGG	..*.*.........*...*.	4	0.131794	0.0303469	NC_037104.1	13758028	13758050	-	intron:XM_024429014.1/XM_024429013.1
164rev	TTTCAGGAGAAGAAGAGGAAAGG	TTTCAGCAGAAAAAGAGGCCTGG	......*....*......**	4	0.0663497	0.0301724	NC_037125.1	14345018	14345040	-	intron:XM_024392637.1
164rev	TTTCAGGAGAAGAAGAGGAAAGG	TTTGAGTAGAATAACAGGAAAGG	...*..*....*..*.....	4	0.128848	0.02997	NC_037108.1	60787385	60787407	-	intron:XM_024440745.1
164rev	TTTCAGGAGAAGAAGAGGAAAGG	TTTGAGTAGAATAACAGGAAAGG	...*..*....*..*.....	4	0.128848	0.02997	NW_020128928.1	788679	788701	-	intron:XM_024404273.1
164rev	TTTCAGGAGAAGAAGAGGAAAGG	CTTCAGGTGAATCAGAGGAAGGG	*......*...**.......	4	0.286209	0.0297447	NC_037098.1	52559424	52559446	+	intergenic:XM_024384079.1-XR_002955395.1
164rev	TTTCAGGAGAAGAAGAGGAAAGG	TTTCAGGAGAAATGGAGGACAGG	...........***.....*	4	0.0161478	0.029697	NC_037106.1	19463891	19463913	+	intergenic:LOC112260106-LOC112261019
164rev	TTTCAGGAGAAGAAGAGGAAAGG	ATCCTGGGGAAGAAGAGGAACAG	*.*.*..*............	4	0.269167	0.0296296	NC_037119.1	564091	564113	-	intergenic:XM_024385385.1-XM_024385386.1
164rev	TTTCAGGAGAAGAAGAGGAAAGG	GTCGAGGAGGAGAAGAGGAAGAG	*.**.....*..........	4	0.25985	0.0295223	NC_037097.1	34585120	34585142	+	exon:XM_024420141.1/XM_024420150.1
164rev	TTTCAGGAGAAGAAGAGGAAAGG	TTTGAGGAGAGGAAGAGGGCGGG	...*......*.......**	4	0.115428	0.0276989	NC_037118.1	31946264	31946286	+	intergenic:XM_024385070.1-XM_024383485.1
164rev	TTTCAGGAGAAGAAGAGGAAAGG	TTTCATTAGATGAAGACGAATGG	.....**...*.....*...	4	0.126324	0.0275803	NC_037110.1	13943634	13943656	-	intergenic:LOC112267739-LOC112267740
164rev	TTTCAGGAGAAGAAGAGGAAAGG	TTTCATTAGATGAAGACGAATGG	.....**...*.....*...	4	0.126324	0.0275803	NC_037103.1	22039166	22039188	-	intergenic:XR_002954098.1/XR_002954097.1-XM_024426222.1
164rev	TTTCAGGAGAAGAAGAGGAAAGG	TTTCATTAGATGAAGACGAATGG	.....**...*.....*...	4	0.126324	0.0275803	NC_037103.1	13821318	13821340	+	intergenic:LOC112255169-LOC112255170
164rev	TTTCAGGAGAAGAAGAGGAAAGG	CTTCAGGATATGAAGGGGAAAGG	*.......*.*....*....	4	0.0923496	0.0270499	NC_037097.1	87782543	87782565	-	intergenic:XR_002954837.1/XR_002954835.1/XR_002954833.1-XM_024436649.1
164rev	TTTCAGGAGAAGAAGAGGAAAGG	TTACAGGAGAGGTAGGGGAAGGG	..*.......*.*..*....	4	0.054754	0.0267857	NC_037108.1	31287547	31287569	-	intron:LOC112263104
164rev	TTTCAGGAGAAGAAGAGGAAAGG	ATTGTGGAGGAGAAGAGGAAGAG	*..**....*..........	4	0.263539	0.0261878	NW_020130284.1	384820	384842	+	intergenic:XR_002951938.1-XM_024408370.1
164rev	TTTCAGGAGAAGAAGAGGAAAGG	ATTGTGGAGGAGAAGAGGAAGAG	*..**....*..........	4	0.263539	0.0261878	NW_020142553.1	483770	483792	-	intergenic:XM_024415529.1-XR_002952983.1
164rev	TTTCAGGAGAAGAAGAGGAAAGG	TTTCAGGAGGAGGAGGGGGAAGG	.........*..*..*..*.	4	0.027629	0.0261288	NC_037105.1	5957811	5957833	+	intron:XM_024434195.1
164rev	TTTCAGGAGAAGAAGAGGAAAGG	TTGCAGGTGAAGCTGAGGAATGG	..*....*....**......	4	0.0813448	0.0240602	NW_020130032.1	57223	57245	+	intergenic:LOC112239500-Gap
164rev	TTTCAGGAGAAGAAGAGGAAAGG	TTGCAGGTGAAGCTGAGGAATGG	..*....*....**......	4	0.0813448	0.0240602	NW_020130032.1	46754	46776	+	intron:LOC112239500
164rev	TTTCAGGAGAAGAAGAGGAAAGG	TTTCAGTAGAAGCTGAGGGATGG	......*.....**....*.	4	0.0186481	0.0240602	NW_020128804.1	8653809	8653831	-	intergenic:XR_002950627.1-XM_024399300.1
164rev	TTTCAGGAGAAGAAGAGGAAAGG	TTTCAGTAGAAGCTGAGGGATGG	......*.....**....*.	4	0.0186481	0.0240602	NW_020128804.1	15238809	15238831	+	intergenic:XM_024399514.1/XM_024399513.1/XM_024399512.1-XR_002950658.1
164rev	TTTCAGGAGAAGAAGAGGAAAGG	TTTCTGGAAAAGATGGGGAAAGG	....*...*....*.*....	4	0.0224033	0.023976	NC_037114.1	14421049	14421071	+	intergenic:XM_024377918.1-XR_002948479.1
164rev	TTTCAGGAGAAGAAGAGGAAAGG	GAGAAGGAGAAGAAGAGGAAAGA	****................	4	0.257335	0.0236656	NC_037126.1	11510330	11510352	+	exon:XM_024393659.1/XM_024393658.1
164rev	TTTCAGGAGAAGAAGAGGAAAGG	GAGAAGGAGAAGAAGAGGAAAGA	****................	4	0.257335	0.0236656	NW_020129985.1	47835	47857	-	exon:XM_024407877.1
164rev	TTTCAGGAGAAGAAGAGGAAAGG	GGGAAGGAGAAGAAGAGGAAAGA	****................	4	0.257335	0.0234935	NC_037124.1	32560533	32560555	+	intergenic:XM_024390777.1-LOC112226390
164rev	TTTCAGGAGAAGAAGAGGAAAGG	TTGCAGGAGAGGAAGGGGGAGGG	..*.......*....*..*.	4	0.0469441	0.0234375	NC_037109.1	2454252	2454274	+	intron:XM_024440847.1
164rev	TTTCAGGAGAAGAAGAGGAAAGG	TTTCAGGTCCAGTAGAGGAAAGG	.......***..*.......	4	0.284187	0.0230769	NC_037104.1	12863755	12863777	-	intergenic:XM_024429005.1/XM_024429004.1/XM_024429003.1/XM_024429002.1/XM_024429001.1-XM_024429001.1
164rev	TTTCAGGAGAAGAAGAGGAAAGG	TTGCAGGAGAAAAAGACGCAAGG	..*........*....*.*.	4	0.0931506	0.0227181	NW_020142548.1	1623716	1623738	+	intergenic:XM_024415357.1/XM_024415356.1/XM_024415355.1-XM_024415440.1
164rev	TTTCAGGAGAAGAAGAGGAAAGG	TTGCAGGAGAAAAAGACGCAAGG	..*........*....*.*.	4	0.0931506	0.0227181	NW_020128810.1	3873463	3873485	+	intergenic:XM_024400268.1/XM_024400267.1/XM_024400266.1-XM_024400269.1
164rev	TTTCAGGAGAAGAAGAGGAAAGG	TGTGAGGAGAAGAATAGGGAGGG	.*.*..........*...*.	4	0.133665	0.0225	NC_037119.1	22235029	22235051	+	intergenic:XM_024386231.1/XM_024386230.1/XM_024386229.1/XM_024386228.1/XM_024386227.1/XM_024386226.1/XM_024386225.1/XM_024386224.1/XM_024386223.1-XM_024386234.1
164rev	TTTCAGGAGAAGAAGAGGAAAGG	GTCCTGGAGGAGAAGAGGAAGAG	*.*.*....*..........	4	0.25985	0.0214707	NW_020129239.1	273358	273380	-	intergenic:Gap-XM_024406010.1
164rev	TTTCAGGAGAAGAAGAGGAAAGG	TTACAGGGGAAGCAGGGGAAGGG	..*....*....*..*....	4	0.0986559	0.0212069	NW_020129026.1	128012	128034	+	intron:XM_024404987.1/XM_024404986.1
164rev	TTTCAGGAGAAGAAGAGGAAAGG	AGTGGGGAGAAGAAGAGGAAAGA	**.**...............	4	0.260989	0.021	NC_037127.1	16930708	16930730	+	intergenic:XM_024395511.1-XM_024395135.1
164rev	TTTCAGGAGAAGAAGAGGAAAGG	AGAGAGGAGAAGAAGAGGAAGGA	****................	4	0.257335	0.0208333	NC_037105.1	618856	618878	+	intron:XM_024434167.1
164rev	TTTCAGGAGAAGAAGAGGAAAGG	TTTCAAGAGAATACGATGAATGG	.....*.....*.*..*...	4	0.02443	0.0206044	NC_037100.1	23481073	23481095	-	intron:XM_024417419.1
164rev	TTTCAGGAGAAGAAGAGGAAAGG	TTACAGGAGATGGATAGGAAGGG	..*.......*.*.*.....	4	0.0853144	0.0204764	NC_037122.1	19336162	19336184	+	intergenic:XM_024389128.1/XM_024389127.1/XM_024389126.1-XM_024389130.1/XM_024389129.1
164rev	TTTCAGGAGAAGAAGAGGAAAGG	TTACTGGAGAAGAATAGGTAGGG	..*.*.........*...*.	4	0.131794	0.01998	NC_037121.1	34336082	34336104	-	intergenic:XM_024388376.1-XM_024388378.1/XM_024388377.1
164rev	TTTCAGGAGAAGAAGAGGAAAGG	GGAGAGGAGAAGAAGAGGAAAGA	****................	4	0.257335	0.0199275	NW_020129973.1	16010	16032	+	intergenic:Gap-XM_024407851.1
164rev	TTTCAGGAGAAGAAGAGGAAAGG	TTTCAGGATAAGAACATGTATGG	........*.....*.*.*.	4	0.0284121	0.0195804	NW_020142542.1	1534494	1534516	+	intron:XM_024415170.1
164rev	TTTCAGGAGAAGAAGAGGAAAGG	TTTCAGGATAAGAACATGTATGG	........*.....*.*.*.	4	0.0284121	0.0195804	NC_037102.1	8407861	8407883	+	intron:XM_024425271.1
164rev	TTTCAGGAGAAGAAGAGGAAAGG	CGAGAGGAGAAGAAGAGGAAGGA	****................	4	0.257335	0.0178571	NC_037103.1	85833344	85833366	+	intergenic:XM_024428161.1-XM_024428369.1
164rev	TTTCAGGAGAAGAAGAGGAAAGG	CGAGAGGAGAAGAAGAGGAAAGA	****................	4	0.257335	0.0178571	NC_037107.1	30114083	30114105	+	exon:XM_024437449.1
164rev	TTTCAGGAGAAGAAGAGGAAAGG	TTACAGGAGACGAACAGGACAGG	..*.......*...*....*	4	0.0968307	0.0177096	NW_020130979.1	34256	34278	-	intergenic:XM_024409135.1-Gap
164rev	TTTCAGGAGAAGAAGAGGAAAGG	TTTCCGGAGCAGATGGGGAAAGG	....*....*...*.*....	4	0.0337699	0.017094	NC_037109.1	70380912	70380934	-	intergenic:LOC112266192-XR_002955805.1
164rev	TTTCAGGAGAAGAAGAGGAAAGG	TTTCTGGATAAGAAGAGGGCGGG	....*...*.........**	4	0.127075	0.0165289	NW_020129838.1	126718	126740	+	intergenic:XM_024407599.1-Gap
164rev	TTTCAGGAGAAGAAGAGGAAAGG	TTTCAGCACAAGTATAGGAAAGG	......*.*...*.*.....	4	0.0590775	0.0158654	NC_037105.1	14551409	14551431	+	intergenic:XM_024431150.1/XM_024431149.1/XM_024431148.1/XM_024431147.1/XM_024431146.1-XM_024431151.1
164rev	TTTCAGGAGAAGAAGAGGAAAGG	TCAGAGGGGAAGAAGAGGAAAGA	.***...*............	4	0.269167	0.0155896	NC_037117.1	3740865	3740887	+	intron:XM_024382340.1
164rev	TTTCAGGAGAAGAAGAGGAAAGG	TGGCAGGCGCAGAAGAGGAATAG	.**....*.*..........	4	0.247902	0.0155556	NW_020131754.1	4817	4839	+	intergenic:Gap-XM_024409727.1
164rev	TTTCAGGAGAAGAAGAGGAAAGG	AGGGAGGAGAAGAAGAGGAAGGA	****................	4	0.257335	0.0145833	NC_037127.1	10010996	10011018	-	exon:XM_024395067.1
164rev	TTTCAGGAGAAGAAGAGGAAAGG	TTTCTGGAGAATAACAGGGAGGG	....*......*..*...*.	4	0.0624334	0.0143039	NC_037103.1	69377784	69377806	-	intergenic:XM_024427765.1/XM_024427764.1/XM_024427763.1/XM_024427761.1/XM_024427760.1/XM_024427759.1/XM_024427758.1-XM_024427765.1/XM_024427764.1/XM_024427761.1/XM_024427760.1/XM_024427759.1/XM_024427758.1/XM_024427763.1
164rev	TTTCAGGAGAAGAAGAGGAAAGG	TTTCAGGGGCAGTAGGGGAACGG	.......*.*..*..*....	4	0.0836784	0.0141026	NC_037108.1	37488017	37488039	-	intron:XM_024439362.1
164rev	TTTCAGGAGAAGAAGAGGAAAGG	GGGGAGGAGAAGAAGAGGAAAGA	****................	4	0.257335	0.0139493	NC_037100.1	72674439	72674461	+	exon:XM_024419224.1
164rev	TTTCAGGAGAAGAAGAGGAAAGG	ATCAAGGAGGAGAAGAGGAAGGA	*.**.....*..........	4	0.25985	0.0139237	NC_037101.1	49039756	49039778	+	exon:XM_024422718.1
164rev	TTTCAGGAGAAGAAGAGGAAAGG	TGGAAGGAGGAGAAGAGGAAGGA	.***.....*..........	4	0.247902	0.0136452	NW_020129606.1	141056	141078	+	intron:LOC112238567
164rev	TTTCAGGAGAAGAAGAGGAAAGG	TTTCAGGAAAACAAGGGGCAAGG	........*..*...*..*.	4	0.0233024	0.0135412	NC_037100.1	49902211	49902233	+	intron:XM_024418384.1/XM_024418383.1
164rev	TTTCAGGAGAAGAAGAGGAAAGG	TTTCAGGAAAACAAGGGGCAAGG	........*..*...*..*.	4	0.0233024	0.0135412	NC_037100.1	49918241	49918263	-	intergenic:XM_024418383.1-XM_024418384.1/XM_024418383.1
164rev	TTTCAGGAGAAGAAGAGGAAAGG	TTTCTGGTGAAGAAGAGGGCGGG	....*..*..........**	4	0.207979	0.0132822	NC_037097.1	68922322	68922344	-	intergenic:XM_024428738.1-XR_002954350.1
164rev	TTTCAGGAGAAGAAGAGGAAAGG	TTGCAGGAGAAGAGCAGGCACGG	..*..........**...*.	4	0.0196373	0.0131661	NW_020128821.1	543848	543870	-	exon:XM_024401558.1
164rev	TTTCAGGAGAAGAAGAGGAAAGG	TTGCAGGAGAAGAGCAGGCACGG	..*..........**...*.	4	0.0196373	0.0131661	NW_020128821.1	3262889	3262911	+	exon:XM_024401665.1
164rev	TTTCAGGAGAAGAAGAGGAAAGG	TTTGAGGAGAGGAAGGGGCAGGG	...*......*....*..*.	4	0.0476107	0.012931	NC_037126.1	18648637	18648659	-	intergenic:XM_024393877.1/XM_024393876.1-XM_024393879.1
164rev	TTTCAGGAGAAGAAGAGGAAAGG	TTTCTGGAAAATAATAGGAAAGG	....*...*..*..*.....	4	0.115265	0.0128443	NC_037106.1	21025455	21025477	-	intergenic:XM_024434955.1-XM_024436380.1
164rev	TTTCAGGAGAAGAAGAGGAAAGG	TTCTGGGGGAAGAAGAGGAACGA	..***..*............	4	0.257335	0.0125714	NC_037116.1	6033112	6033134	+	intron:XR_002948821.1/XR_002948820.1/XM_024381591.1/XM_024381590.1/XM_024381589.1
164rev	TTTCAGGAGAAGAAGAGGAAAGG	TTCTGGGGGAAGAAGAGGAACGA	..***..*............	4	0.257335	0.0125714	NC_037116.1	6029025	6029047	+	intron:XR_002948821.1/XR_002948820.1/XM_024381591.1/XM_024381590.1/XM_024381589.1
164rev	TTTCAGGAGAAGAAGAGGAAAGG	TTGCAGGAGGAGAAGGGGACGGG	..*......*.....*...*	4	0.103127	0.0121406	NC_037103.1	47110262	47110284	+	exon:XM_024426997.1/XM_024426996.1/XM_024426994.1
164rev	TTTCAGGAGAAGAAGAGGAAAGG	TTTGAGGAGAAGAAGGGGCTTGG	...*...........*..**	4	0.0357723	0.0119363	NC_037129.1	11105234	11105256	-	exon:XM_024397259.1
164rev	TTTCAGGAGAAGAAGAGGAAAGG	CTCCTGGAGCAGAAGAGGAAGAG	*.*.*....*..........	4	0.25985	0.011544	NC_037099.1	7256888	7256910	-	exon:XM_024391953.1
164rev	TTTCAGGAGAAGAAGAGGAAAGG	CTCCTGGAGCAGAAGAGGAAGAG	*.*.*....*..........	4	0.25985	0.011544	NC_037108.1	34602885	34602907	-	exon:XM_024439239.1
164rev	TTTCAGGAGAAGAAGAGGAAAGG	CTCCTGGAGCAGAAGAGGAAGAG	*.*.*....*..........	4	0.25985	0.011544	NW_020142513.1	827372	827394	+	exon:XM_024414043.1
164rev	TTTCAGGAGAAGAAGAGGAAAGG	CCGCAGGTGAAGAAGAGGAATGA	***....*............	4	0.269167	0.0109329	NW_020129447.1	86808	86830	-	intron:XM_024406726.1
164rev	TTTCAGGAGAAGAAGAGGAAAGG	TGTCAGGAGAAGCATAGGCAAGG	.*..........*.*...*.	4	0.0517284	0.00522686	NW_020142529.1	1196230	1196252	+	intron:XM_024414553.1
164rev	TTTCAGGAGAAGAAGAGGAAAGG	TTTCAGGAGAAGAATATACAAGG	..............*.***.	4	0.00831293	0.00511557	NW_020142538.1	358126	358148	-	intergenic:XM_024414888.1/XM_024414887.1-XR_002952938.1
164rev	TTTCAGGAGAAGAAGAGGAAAGG	TTTCAGGAGAAGAATATACAAGG	..............*.***.	4	0.00831293	0.00511557	NC_037129.1	20941357	20941379	-	intergenic:XM_024397569.1/XM_024397568.1-XR_002950357.1
164rev	TTTCAGGAGAAGAAGAGGAAAGG	TTTCAGGAGAAGCATGGGAGGGG	............*.**...*	4	0.0101537	0.00442282	NC_037129.1	9557625	9557647	-	intergenic:XM_024397223.1-XM_024397226.1
164rev	TTTCAGGAGAAGAAGAGGAAAGG	TGTCAGAAGAAGACGTGGAAAGG	.*....*......*.*....	4	0.0263113	0	NC_037103.1	6316243	6316265	+	intergenic:XM_024425705.1/XM_024425704.1-XM_024425707.1
164rev	TTTCAGGAGAAGAAGAGGAAAGG	TTGCAGGTGAAGAAGCAGAAAGG	..*....*.......**...	4	0.098146	0	NC_037109.1	74025468	74025490	-	intergenic:XM_024443659.1-XR_002955873.1
164rev	TTTCAGGAGAAGAAGAGGAAAGG	TGTCAGTAGAAGAAGCTGAAAGG	.*....*........**...	4	0.0716114	0	NC_037104.1	43462198	43462220	+	intergenic:XM_024429801.1-XM_024429802.1
164rev	TTTCAGGAGAAGAAGAGGAAAGG	TTTGAGGAGAAGGAGTGGGAGGG	...*........*..*..*.	4	0.0331988	0	NC_037105.1	65974262	65974284	+	intron:LOC112259158
164rev	TTTCAGGAGAAGAAGAGGAAAGG	TTTCAGGAGCAGAACCGGCATGG	.........*....**..*.	4	0.0191333	0	NC_037102.1	9224278	9224300	+	intergenic:XM_024425304.1-XM_024425305.1
164rev	TTTCAGGAGAAGAAGAGGAAAGG	TTGAAGGAGAAGAAGTGAAAGGG	..**...........*.*..	4	0.0526301	0	NW_020142510.1	4908253	4908275	-	intergenic:LOC112245161-XM_024413384.1
164rev	TTTCAGGAGAAGAAGAGGAAAGG	TTTCAGAAGAAGAACTGGGAGGG	......*.......**..*.	4	0.0149074	0	NW_020142522.1	2219140	2219162	-	intergenic:XM_024414398.1-XM_024414393.1
164rev	TTTCAGGAGAAGAAGAGGAAAGG	TATCATGAGAAGAACTGGAAAGG	.*...*........**....	4	0.0419204	0	NC_037124.1	27706258	27706280	-	intron:XM_024390760.1
164rev	TTTCAGGAGAAGAAGAGGAAAGG	TTTGAGGAGAAGGAGTGGACCGG	...*........*..*...*	4	0.0439489	0	NC_037097.1	11205692	11205714	+	intergenic:XR_002955029.1-XM_024392568.1/XM_024392490.1/XM_024392427.1
164rev	TTTCAGGAGAAGAAGAGGAAAGG	TTTGAAGAGAAGGAGTGGAAAGG	...*.*......*..*....	4	0.0605343	0	NC_037106.1	11647705	11647727	+	intergenic:XM_024434726.1/XM_024434725.1/XM_024434724.1/XM_024434723.1/XM_024434722.1/XM_024434721.1/XM_024434720.1/XM_024434719.1/XM_024434718.1/XM_024434717.1/XM_024434716.1/XM_024434715.1/XM_024434714.1/XM_024434713.1/XM_024434711.1/XM_024434710.1/XM_024434709.1/XM_024434708.1/XM_024434707.1/XM_024434706.1/XM_024434705.1/XM_024434704.1/XM_024434703.1/XM_024434702.1/XM_024434701.1/XM_024434699.…
164rev	TTTCAGGAGAAGAAGAGGAAAGG	TTGAAGGAGAAGAAGTGAAAGGG	..**...........*.*..	4	0.0526301	0	NC_037102.1	33053808	33053830	+	intergenic:XM_024423800.1-LOC112253479
164rev	TTTCAGGAGAAGAAGAGGAAAGG	TTTCATGAGATGAAGCGAAAAGG	.....*....*....*.*..	4	0.0170153	0	NC_037124.1	26186020	26186042	-	intergenic:LOC112227386-LOC112227387
164rev	TTTCAGGAGAAGAAGAGGAAAGG	TTTCAGAAGAAGAACTGGGAGGG	......*.......**..*.	4	0.0149074	0	NC_037104.1	63894935	63894957	-	intergenic:XM_024430427.1-XR_002954528.1
164rev	TTTCAGGAGAAGAAGAGGAAAGG	TTTCAGGAGAGGAATTAGAATGG	..........*...***...	4	0.0134441	0	NC_037122.1	11186174	11186196	-	intergenic:XM_024388572.1-LOC112224991
164rev	TTTCAGGAGAAGAAGAGGAAAGG	TTTCAGTAGAATAAACGGAACGG	......*....*..**....	4	0.0221618	0	NC_037117.1	35678959	35678981	-	intergenic:XM_024382516.1-XM_024382447.1
164rev	TTTCAGGAGAAGAAGAGGAAAGG	TTTCAAAAGAAAAAGTGGAAAGG	.....**....*...*....	4	0.0500294	0	NC_037125.1	29162550	29162572	+	intergenic:XM_024393149.1-XM_024392391.1
164rev	TTTCAGGAGAAGAAGAGGAAAGG	TTTCAGAAGAAGAACTGGGAGGG	......*.......**..*.	4	0.0149074	0	NW_020142506.1	194108	194130	+	intergenic:XM_024412983.1-Gap
164rev	TTTCAGGAGAAGAAGAGGAAAGG	TGTCAGGAGAAGGAGCGGCAGGG	.*..........*..*..*.	4	0.0331988	0	NC_037124.1	8373237	8373259	+	intergenic:XR_002949772.1/XR_002949773.1-XR_002949773.1
164rev	TTTCAGGAGAAGAAGAGGAAAGG	TCTCAGAAGAAGAAGCGCAATGG	.*....*........*.*..	4	0.0364567	0	NC_037102.1	30772037	30772059	+	intergenic:XM_024425349.1-XM_024423781.1
164rev	TTTCAGGAGAAGAAGAGGAAAGG	TTTCAGGAGCAGAACCGGCATGG	.........*....**..*.	4	0.0191333	0	NW_020142542.1	2350911	2350933	+	intergenic:XM_024415255.1-XM_024415220.1
164rev	TTTCAGGAGAAGAAGAGGAAAGG	TGTCAGGAGAAGGAGCGGCAGGG	.*..........*..*..*.	4	0.0331988	0	NC_037124.1	7211235	7211257	+	intergenic:XR_002949768.1/XR_002949769.1-XR_002949769.1
164rev	TTTCAGGAGAAGAAGAGGAAAGG	TTTCAGGATAAAAAATGGAATGG	........*..*..**....	4	0.018914	0	NC_037112.1	58006803	58006825	+	intergenic:XM_024376076.1/XM_024376072.1/XM_024376074.1-XM_024376073.1
164rev	TTTCAGGAGAAGAAGAGGAAAGG	TCTCAGAAGAAGAAGCGCAATGG	.*....*........*.*..	4	0.0364567	0	NW_020142510.1	7190024	7190046	-	intergenic:XM_024413136.1-XM_024413236.1
164rev	TTTCAGGAGAAGAAGAGGAAAGG	TTTCAGGAGAACAAGTAGCAGGG	...........*...**.*.	4	0.0140081	0	NC_037129.1	37228591	37228613	+	intron:XR_002950365.1
164rev	TTTCAGGAGAAGAAGAGGAAAGG	TATGAGGAGAAAAAGTGGAAAGG	.*.*.......*...*....	4	0.127204	0	NC_037116.1	33021301	33021323	+	intron:XM_024380620.1/XM_024380619.1
164rev	TTTCAGGAGAAGAAGAGGAAAGG	TTTCNGGAGGAGAGGGGGAGAGG	....*....*...*.*...*	4	0.00901251	None	NC_037113.1	12772389	12772411	+	intron:XM_024377457.1
164rev	TTTCAGGAGAAGAAGAGGAAAGG	CTTTAGGAGAAGAAAAGGAATGG	*..*..........*.....	3	0.844444	0.645378	NC_037117.1	2740856	2740878	+	intron:XM_024382564.1/XM_024382563.1
164rev	TTTCAGGAGAAGAAGAGGAAAGG	TGTCAAGAGAAGAAGAGGAGAGG	.*...*.............*	3	0.902715	0.642353	NW_020142653.1	28681	28703	+	intergenic:Gap-rna81508
164rev	TTTCAGGAGAAGAAGAGGAAAGG	TGTCAGAAGAGGAAGAGGAATGG	.*....*...*.........	3	1.01297	0.546	NC_037121.1	793141	793163	+	intergenic:rna51784-XM_024387341.1/XM_024387340.1
164rev	TTTCAGGAGAAGAAGAGGAAAGG	TGTCAGAAGAGGAAGAGGAATGG	.*....*...*.........	3	1.01297	0.546	NW_020128810.1	802200	802222	+	intergenic:rna64710-XM_024400126.1/XM_024400124.1
164rev	TTTCAGGAGAAGAAGAGGAAAGG	TGTCAGAAGAGGAAGAGGAATGG	.*....*...*.........	3	1.01297	0.546	NC_037115.1	16922975	16922997	-	intergenic:XR_002948684.1-XM_024380395.1
164rev	TTTCAGGAGAAGAAGAGGAAAGG	GGTCAGGAGAAGGAGAGGAAGGG	**..........*.......	3	1.1507	0.524008	NC_037109.1	28583233	28583255	+	intron:XM_024443532.1
164rev	TTTCAGGAGAAGAAGAGGAAAGG	TGTCAGAAGAAGAAGAGGATAGG	.*....*............*	3	1.0191	0.504	NC_037097.1	64568624	64568646	+	intron:XM_024428014.1
164rev	TTTCAGGAGAAGAAGAGGAAAGG	TTTCAGGATAAAAAAAGGAATGG	........*..*..*.....	3	0.204915	0.468497	NC_037115.1	23619719	23619741	-	intron:XM_024380414.1
164rev	TTTCAGGAGAAGAAGAGGAAAGG	TTTCAGGATAAAAAAAGGAATGG	........*..*..*.....	3	0.204915	0.468497	NC_037107.1	6422085	6422107	-	intergenic:XM_024438059.1-XM_024436635.1/XM_024436634.1/XM_024436633.1/XM_024436632.1
164rev	TTTCAGGAGAAGAAGAGGAAAGG	AGTGAGGAGAAGAAGAGGAAAGG	**.*................	3	2.3199	0.42	NW_020142509.1	1125779	1125801	+	intergenic:XM_024413045.1/XM_024413044.1-XM_024413038.1
164rev	TTTCAGGAGAAGAAGAGGAAAGG	AGTGAGGAGAAGAAGAGGAAAGG	**.*................	3	2.3199	0.42	NW_020128814.1	520657	520679	-	intergenic:XM_024400960.1-XM_024400963.1/XM_024400962.1
164rev	TTTCAGGAGAAGAAGAGGAAAGG	TTTAGGGAGAAGAAGAGAAAGGG	...**............*..	3	0.617579	0.419757	NC_037119.1	22186421	22186443	+	intergenic:XM_024385325.1-XM_024386223.1/XM_024386225.1/XM_024386224.1/XM_024386226.1/XM_024386227.1/XM_024386228.1/XM_024386229.1/XM_024386230.1/XM_024386231.1
164rev	TTTCAGGAGAAGAAGAGGAAAGG	TTTTAGGAGGAAAAGAGGAATGG	...*.....*.*........	3	1.2109	0.414815	NC_037117.1	19377155	19377177	-	intergenic:XM_024383153.1/XM_024383145.1/XM_024383154.1/XM_024383151.1/XM_024383150.1/XM_024383149.1/XM_024383147.1/XM_024383148.1/XM_024383146.1/XM_024383152.1-XM_024383154.1/XM_024383153.1/XM_024383152.1/XM_024383151.1/XM_024383150.1/XM_024383149.1/XM_024383148.1/XM_024383147.1/XM_024383146.1/XM_024383145.1
164rev	TTTCAGGAGAAGAAGAGGAAAGG	TTTCAGGATAAGAAAAGAAACGG	........*.....*..*..	3	0.0857662	0.347511	NC_037115.1	50429084	50429106	-	intergenic:LOC112218927-XR_002948672.1
164rev	TTTCAGGAGAAGAAGAGGAAAGG	TATCAGGAGAAGGAGAGGATGGG	.*..........*......*	3	0.577439	0.331104	NC_037097.1	88452344	88452366	+	intergenic:LOC112254674-XM_024434237.1/XM_024434230.1
164rev	TTTCAGGAGAAGAAGAGGAAAGG	TTTGAGAAGAAGGAGAGGAATGG	...*..*.....*.......	3	0.706343	0.326087	NC_037126.1	22513326	22513348	+	intergenic:XM_024394011.1-XM_024394012.1
164rev	TTTCAGGAGAAGAAGAGGAAAGG	TTTCAGAAGAAGATGAGGATGGG	......*......*.....*	3	0.126182	0.32	NC_037109.1	33196875	33196897	+	intergenic:XM_024441917.1/XM_024441916.1/XM_024441915.1/XM_024441914.1-XM_024441914.1/XM_024441917.1/XM_024441916.1/XM_024441915.1
164rev	TTTCAGGAGAAGAAGAGGAAAGG	TTACAGGAGAAGGAGAGTAATGG	..*.........*....*..	3	0.235657	0.310559	NC_037112.1	19302649	19302671	-	intergenic:XR_002948371.1-XM_024374727.1/XM_024374726.1/XM_024374725.1
164rev	TTTCAGGAGAAGAAGAGGAAAGG	TGTCTGGAGAAGAAAAGGAAAGG	.*..*.........*.....	3	0.79687	0.287487	NC_037115.1	30704003	30704025	-	intron:XM_024380420.1
164rev	TTTCAGGAGAAGAAGAGGAAAGG	TTCCACGAGAAGAAGAAGAAAGG	..*..*..........*...	3	0.723651	0.272727	NC_037116.1	36240343	36240365	+	exon:LOC112219502
164rev	TTTCAGGAGAAGAAGAGGAAAGG	TTACAGTAAAAGAAGAGGAAGGG	..*...*.*...........	3	1.04658	0.262391	NW_020130694.1	34837	34859	-	intergenic:Gap-XM_024408841.1
164rev	TTTCAGGAGAAGAAGAGGAAAGG	ATTCAAAAGAAGAAGAGGAAGAG	*....**.............	3	0.210203	0.259259	NC_037104.1	63730477	63730499	+	intergenic:XM_024430427.1-XR_002954528.1
164rev	TTTCAGGAGAAGAAGAGGAAAGG	ATTCAGGAGAAGGAGAGGGATGG	*...........*.....*.	3	0.436195	0.244565	NC_037104.1	26182890	26182912	+	intron:XM_024429481.1
164rev	TTTCAGGAGAAGAAGAGGAAAGG	CTTGAGGAGGAGAAGAGGAAGGG	*..*.....*..........	3	2.46118	0.238095	NW_020128808.1	1616215	1616237	-	intron:XM_024399988.1
164rev	TTTCAGGAGAAGAAGAGGAAAGG	TGTCAGGACAAGAGGAGGAATGG	.*......*....*......	3	0.270695	0.211077	NW_020129645.1	111263	111285	-	intergenic:LOC112238644-Gap
164rev	TTTCAGGAGAAGAAGAGGAAAGG	TTCCAGGAAAAGAAGAGGAGGGG	..*.....*..........*	3	0.841831	0.210684	NC_037104.1	33912789	33912811	+	intron:XM_024429624.1
164rev	TTTCAGGAGAAGAAGAGGAAAGG	CTTCAGGAGAGGAAGAGGGAGGG	*.........*.......*.	3	0.625551	0.208929	NW_020129037.1	307059	307081	-	intron:XM_024405071.1
164rev	TTTCAGGAGAAGAAGAGGAAAGG	TTCCAGCAGAAGAAGAGAAAGGG	..*...*..........*..	3	0.415901	0.203984	NW_020128811.1	2796907	2796929	+	exon:XM_024400324.1
164rev	TTTCAGGAGAAGAAGAGGAAAGG	TTCCAGCAGAAGAAGAGAAAGGG	..*...*..........*..	3	0.415901	0.203984	NC_037101.1	28536659	28536681	+	exon:XM_024420377.1
164rev	TTTCAGGAGAAGAAGAGGAAAGG	TTCCAGCAGAAGAAGAGAAAGGG	..*...*..........*..	3	0.415901	0.203984	NC_037101.1	45640376	45640398	+	exon:XM_024420888.1
164rev	TTTCAGGAGAAGAAGAGGAAAGG	CATCAAGAGAAGAAGAGGAAGAG	**...*..............	3	0.293614	0.188034	NW_020128984.1	197749	197771	-	intron:XM_024404722.1
164rev	TTTCAGGAGAAGAAGAGGAAAGG	TTTCTGGAGAGGAAGAGGAGGGG	....*.....*........*	3	0.729231	0.180749	NC_037119.1	5824779	5824801	+	intergenic:XM_024385577.1/XM_024385576.1/XM_024385575.1/XM_024385574.1/XM_024385579.1-XM_024385581.1
164rev	TTTCAGGAGAAGAAGAGGAAAGG	TTTCAGGAGAAAAAGATGAGTGG	...........*....*..*	3	0.211079	0.178431	NC_037122.1	34236914	34236936	-	intergenic:LOC112224855-XM_024389653.1/XM_024389652.1/XM_024389651.1/XM_024389650.1
164rev	TTTCAGGAGAAGAAGAGGAAAGG	TTTCAGGAGAAGGAGAGAGATGG	............*....**.	3	0.060773	0.169314	NC_037100.1	3017068	3017090	+	intergenic:XM_024419278.1-XM_024415067.1
164rev	TTTCAGGAGAAGAAGAGGAAAGG	TTTCAGGAGAGGAAGAGAGAGGG	..........*......**.	3	0.091568	0.16875	NC_037100.1	45110489	45110511	+	intergenic:XM_024418203.1-XM_024418206.1/XM_024418205.1
164rev	TTTCAGGAGAAGAAGAGGAAAGG	ATTCAGGGGTAGAAGAGGAAAAG	*......*.*..........	3	0.492236	0.167756	NC_037110.1	25444433	25444455	+	intergenic:XR_002956010.1/XR_002956009.1/XR_002956008.1/XR_002956007.1/XR_002956006.1/XR_002956005.1/XR_002956004.1/XR_002956003.1/XR_002956001.1/XR_002956011.1/XR_002956002.1-XR_002956011.1/XR_002956010.1/XR_002956009.1/XR_002956008.1/XR_002956007.1/XR_002956006.1/XR_002956005.1/XR_002956004.1/XR_002956003.1/XR_002956002.1/XR_002956001.1
164rev	TTTCAGGAGAAGAAGAGGAAAGG	TTTCTTGAGAAGGAGAGGAATGG	....**......*.......	3	0.625677	0.158103	NC_037105.1	88907202	88907224	+	intergenic:XM_024433801.1-XM_024433802.1
164rev	TTTCAGGAGAAGAAGAGGAAAGG	ATACAGGAGAAGCAGAGGAATGG	*.*.........*.......	3	1.13459	0.150376	NC_037121.1	22058218	22058240	-	intergenic:XM_024388462.1-XM_024388075.1/XM_024388074.1
164rev	TTTCAGGAGAAGAAGAGGAAAGG	TGACAGGAGAAGAAGAAGAAGAG	.**.............*...	3	0.239224	0.145185	NC_037117.1	32310583	32310605	+	intron:XM_024383417.1
164rev	TTTCAGGAGAAGAAGAGGAAAGG	CTCCAGGAGAAGAAGAGGGAGGG	*.*...............*.	3	1.11134	0.137755	NC_037121.1	23431097	23431119	+	intergenic:LOC112224802-XM_024388093.1
164rev	TTTCAGGAGAAGAAGAGGAAAGG	TCCCAGGAGAAGAAGAGGGAGGG	.**...............*.	3	1.04078	0.137755	NC_037121.1	23430204	23430226	+	intergenic:LOC112224802-XM_024388093.1
164rev	TTTCAGGAGAAGAAGAGGAAAGG	TGTCAGGAGAAGAAGACTAATGG	.*..............**..	3	0.252864	0.131765	NW_020129392.1	402266	402288	+	intron:XM_024406605.1
164rev	TTTCAGGAGAAGAAGAGGAAAGG	CTTCAGGGGAAGAAGAGGAGGAG	*......*...........*	3	0.298418	0.124619	NC_037104.1	61672604	61672626	-	intron:XM_024430376.1
164rev	TTTCAGGAGAAGAAGAGGAAAGG	TTTCAGGAAAAGAAAGGGAAGGG	........*.....**....	3	0.071637	0.116354	NC_037106.1	13602203	13602225	-	intron:XM_024434755.1
164rev	TTTCAGGAGAAGAAGAGGAAAGG	GTTTAGGAGGAGAAGAGGAAAAG	*..*.....*..........	3	0.492236	0.110216	NC_037101.1	187069	187091	-	intergenic:Gap-XM_024419541.1
164rev	TTTCAGGAGAAGAAGAGGAAAGG	TTTCAGGAGATGGAGAGGTATGG	..........*.*.....*.	3	0.1808	0.108052	NC_037109.1	13160371	13160393	+	intron:XM_024443390.1
164rev	TTTCAGGAGAAGAAGAGGAAAGG	GATGAGGAGAAGAAGAGGAAAAG	**.*................	3	0.46398	0.104918	NW_020129035.1	298194	298216	+	intergenic:XM_024405066.1-LOC112236473
164rev	TTTCAGGAGAAGAAGAGGAAAGG	TTTCTGGAGAAGAAGAGGGGCGG	....*.............**	3	0.413888	0.104278	NC_037112.1	45253731	45253753	+	intergenic:XM_024375494.1-XM_024375495.1
164rev	TTTCAGGAGAAGAAGAGGAAAGG	GGTGAGGAGAAGAAGAGGAAGAG	**.*................	3	0.46398	0.104155	NW_020142500.1	824048	824070	-	intergenic:XM_024412799.1/XM_024412800.1-LOC112244897
164rev	TTTCAGGAGAAGAAGAGGAAAGG	TTTCAGGAGAGGTTGAGGAATGG	..........*.**......	3	0.0742438	0.104	NC_037129.1	7028941	7028963	+	intergenic:XM_024397164.1-XM_024397165.1
164rev	TTTCAGGAGAAGAAGAGGAAAGG	TTAAAGGAGAAGGAGAGGAAAAG	..**........*.......	3	0.214817	0.101704	NW_020142510.1	6928411	6928433	-	intergenic:XM_024413504.1/XM_024413503.1/XM_024413502.1/XM_024413506.1/XM_024413505.1-XM_024413136.1
164rev	TTTCAGGAGAAGAAGAGGAAAGG	TTAAAGGAGAAGGAGAGGAAAAG	..**........*.......	3	0.214817	0.101704	NC_037102.1	31033650	31033672	+	intergenic:XM_024423781.1-XM_024423785.1/XM_024423784.1/XM_024423782.1/XM_024423787.1/XM_024423786.1
164rev	TTTCAGGAGAAGAAGAGGAAAGG	TGTCAGCAGAGGAAGAGGAAGAG	.*....*...*.........	3	0.202595	0.0973194	NC_037126.1	38433494	38433516	+	intron:XM_024393279.1/XM_024393278.1/XM_024393277.1/XM_024393276.1
164rev	TTTCAGGAGAAGAAGAGGAAAGG	TTTCTGTAGAAGAGGAGGAAGGG	....*.*......*......	3	0.271951	0.0969697	NC_037112.1	62568628	62568650	+	intergenic:XM_024376244.1/XM_024376241.1/XM_024376240.1/XM_024376242.1/XM_024376243.1-XM_024376244.1/XM_024376243.1/XM_024376242.1/XM_024376241.1/XM_024376240.1
164rev	TTTCAGGAGAAGAAGAGGAAAGG	TCGAAGGAGAAGAAGAGGAAAAG	.***................	3	0.457485	0.0935673	NC_037104.1	16474256	16474278	-	intergenic:XM_024430656.1-XM_024428533.1
164rev	TTTCAGGAGAAGAAGAGGAAAGG	TCTCTGGAGAAGTAGAGGAAGGG	.*..*.......*.......	3	1.08933	0.0935065	NC_037097.1	79435441	79435463	-	exon:XM_024431569.1
164rev	TTTCAGGAGAAGAAGAGGAAAGG	TTGCAGGGGAAAAAGAGGAAGAG	..*....*...*........	3	0.259272	0.0887243	NW_020142630.1	467900	467922	+	intergenic:XM_024416280.1-XM_024416269.1/XM_024416267.1/XM_024416271.1/XM_024416268.1/XM_024416265.1/XM_024416264.1/XM_024416270.1/XM_024416266.1
164rev	TTTCAGGAGAAGAAGAGGAAAGG	TTGCAGGGGAAAAAGAGGAAGAG	..*....*...*........	3	0.259272	0.0887243	NC_037106.1	47248849	47248871	+	intergenic:XM_024435830.1-XM_024435837.1/XM_024435835.1/XM_024435839.1/XM_024435836.1/XM_024435832.1/XM_024435831.1/XM_024435838.1/XM_024435834.1
164rev	TTTCAGGAGAAGAAGAGGAAAGG	TTAGAGGAGAAGAAGAAGAAGAG	..**............*...	3	0.239224	0.0864198	NC_037103.1	83457480	83457502	-	intergenic:XM_024428140.1-XM_024428144.1/XM_024428142.1/XM_024428143.1
164rev	TTTCAGGAGAAGAAGAGGAAAGG	ATTGAGGAGAGGAAGAGGAAGAG	*..*......*.........	3	0.312444	0.0842593	NC_037103.1	4044987	4045009	+	intergenic:LOC112253703-XM_024425654.1
164rev	TTTCAGGAGAAGAAGAGGAAAGG	TTGTAGGAGAAGAAGAGGAGGAG	..**...............*	3	0.275558	0.0793028	NC_037101.1	73026173	73026195	+	intergenic:XM_024422023.1-LOC112251195
164rev	TTTCAGGAGAAGAAGAGGAAAGG	TTGTAGGAGAAGAAGAGGAGGAG	..**...............*	3	0.275558	0.0793028	NC_037101.1	76938965	76938987	+	intergenic:XM_024422168.1-LOC112251266
164rev	TTTCAGGAGAAGAAGAGGAAAGG	TTTCACTAGAAGAAGGGGAAAGG	.....**........*....	3	0.200057	0.0749251	NC_037115.1	29405787	29405809	+	intergenic:XM_024379514.1/XM_024379513.1-XR_002948688.1
164rev	TTTCAGGAGAAGAAGAGGAAAGG	TTCCTGGAGAAGAGGAGGAAAGG	..*.*........*......	3	0.413536	0.0727273	NC_037120.1	13560813	13560835	+	exon:XM_024386671.1/XM_024386670.1/XM_024386669.1/XM_024386668.1/XM_024386667.1/XM_024386666.1/XM_024386665.1
164rev	TTTCAGGAGAAGAAGAGGAAAGG	TTCCTGGAGAAGAGGAGGAAAGG	..*.*........*......	3	0.413536	0.0727273	NC_037121.1	6795771	6795793	-	exon:XM_024387497.1/XM_024387496.1/XM_024387495.1
164rev	TTTCAGGAGAAGAAGAGGAAAGG	ATTCCGGAGGAGAAGAGGAAGAG	*...*....*..........	3	0.492236	0.0720165	NW_020128900.1	89618	89640	-	intergenic:XM_024403942.1/XM_024403941.1/XM_024403940.1-LOC112235490
164rev	TTTCAGGAGAAGAAGAGGAAAGG	TGCCAGGAGAAGAAGAGGAGAAG	.**................*	3	0.29424	0.0713725	NW_020130003.1	132539	132561	-	exon:XM_024407902.1
164rev	TTTCAGGAGAAGAAGAGGAAAGG	TTTGGGGAGAAGAAGAGGAGGAG	...**..............*	3	0.279471	0.0713725	NC_037098.1	50906266	50906288	+	intergenic:XM_024438344.1-XR_002949011.1
164rev	TTTCAGGAGAAGAAGAGGAAAGG	TTTGAGGAGAGGACGAGGAACGG	...*......*..*......	3	0.232771	0.0696429	NC_037105.1	4266815	4266837	+	exon:XM_024430837.1/XM_024430836.1/XM_024430835.1/XM_024430834.1/XM_024430833.1/XM_024430832.1/XM_024430831.1
164rev	TTTCAGGAGAAGAAGAGGAAAGG	TCTCAGGAGCAAAAGAGGAAAAG	.*.......*.*........	3	0.255097	0.0691358	NC_037114.1	9555115	9555137	+	intron:XM_024377557.1
164rev	TTTCAGGAGAAGAAGAGGAAAGG	TTACAGTAAAAGAAGAGGAAGAG	..*...*.*...........	3	0.209316	0.0680272	NC_037128.1	11547208	11547230	-	intergenic:XM_024396277.1-XM_024396278.1
164rev	TTTCAGGAGAAGAAGAGGAAAGG	TTACAGTAAAAGAAGAGGAAAAG	..*...*.*...........	3	0.209316	0.0680272	NW_020142498.1	1034125	1034147	-	intergenic:LOC112244765-LOC112244740
164rev	TTTCAGGAGAAGAAGAGGAAAGG	TTACAGTAAAAGAAGAGGAAGAG	..*...*.*...........	3	0.209316	0.0680272	NC_037117.1	35462083	35462105	+	exon:XM_024383457.1
164rev	TTTCAGGAGAAGAAGAGGAAAGG	TTACAGTAAAAGAAGAGGAAGAG	..*...*.*...........	3	0.209316	0.0680272	NC_037117.1	35468412	35468434	+	intergenic:XM_024383458.1-XM_024383457.1
164rev	TTTCAGGAGAAGAAGAGGAAAGG	TTACAGTAAAAGAAGAGGAAAAG	..*...*.*...........	3	0.209316	0.0680272	NC_037099.1	18905006	18905028	+	intergenic:LOC112223776-LOC112230825
164rev	TTTCAGGAGAAGAAGAGGAAAGG	TTACAGTAAAAGAAGAGGAAGAG	..*...*.*...........	3	0.209316	0.0680272	NC_037103.1	28043241	28043263	+	intergenic:XM_024428261.1-LOC112254079
164rev	TTTCAGGAGAAGAAGAGGAAAGG	TTACAGTAAAAGAAGAGGAAGAG	..*...*.*...........	3	0.209316	0.0680272	NW_020130544.1	56871	56893	-	intergenic:XM_024408673.1-XM_024408669.1
164rev	TTTCAGGAGAAGAAGAGGAAAGG	TTACAGTAAAAGAAGAGGAAGAG	..*...*.*...........	3	0.209316	0.0680272	NW_020130793.1	36295	36317	-	intergenic:Gap-XM_024408969.1
164rev	TTTCAGGAGAAGAAGAGGAAAGG	TTACAGTAAAAGAAGAGGAAGAG	..*...*.*...........	3	0.209316	0.0680272	NC_037105.1	32198383	32198405	+	exon:XM_024434160.1
164rev	TTTCAGGAGAAGAAGAGGAAAGG	TTACAGTAAAAGAAGAGGAAGAG	..*...*.*...........	3	0.209316	0.0680272	NC_037099.1	18625248	18625270	-	intergenic:XM_024386938.1-XM_024397041.1
164rev	TTTCAGGAGAAGAAGAGGAAAGG	TTACAGTAAAAGAAGAGGAACAG	..*...*.*...........	3	0.209316	0.0680272	NC_037109.1	36673147	36673169	-	intergenic:XM_024442008.1/XR_002955712.1-XM_024443538.1
164rev	TTTCAGGAGAAGAAGAGGAAAGG	TTACAGTAAAAGAAGAGGAAGAG	..*...*.*...........	3	0.209316	0.0680272	NW_020142498.1	1313883	1313905	+	intergenic:XM_024412551.1-XM_024412553.1
164rev	TTTCAGGAGAAGAAGAGGAAAGG	TTACAGTAAAAGAAGAGGAAGAG	..*...*.*...........	3	0.209316	0.0680272	NC_037105.1	32153022	32153044	+	intergenic:LOC112257880-XM_024434160.1
164rev	TTTCAGGAGAAGAAGAGGAAAGG	TTTGAGGAGGAGAAGAAGAAGAG	...*.....*......*...	3	0.210864	0.0672154	NC_037103.1	83457347	83457369	-	intergenic:XM_024428140.1-XM_024428144.1/XM_024428142.1/XM_024428143.1
164rev	TTTCAGGAGAAGAAGAGGAAAGG	TTACTGGAGTAGAAGAGGAAGAG	..*.*....*..........	3	0.461955	0.0594177	NC_037124.1	39768633	39768655	-	intergenic:XM_024390810.1-XR_002949861.1
164rev	TTTCAGGAGAAGAAGAGGAAAGG	CCTCAGGAGAAGAAGAAGAAGGA	**..............*...	3	0.258025	0.047619	NW_020128850.1	598597	598619	-	exon:XM_024403139.1
164rev	TTTCAGGAGAAGAAGAGGAAAGG	CCTCAGGAGAAGAAGAAGAAGGA	**..............*...	3	0.258025	0.047619	NW_020142581.1	156769	156791	+	exon:XM_024415839.1
164rev	TTTCAGGAGAAGAAGAGGAAAGG	GTTGAGGAGAAGAAGAGGGAGAG	*..*..............*.	3	0.225424	0.0464976	NC_037100.1	580365	580387	-	intron:LOC112249408
164rev	TTTCAGGAGAAGAAGAGGAAAGG	TCTCTGTAGAAGAAGAGGAAGAG	.*..*.*.............	3	0.331469	0.046176	NC_037101.1	40786313	40786335	-	intron:XM_024420793.1
164rev	TTTCAGGAGAAGAAGAGGAAAGG	ATAAAGGAGAAGAAGAGGAAAGA	*.**................	3	0.457485	0.0417711	NW_020142499.1	1858601	1858623	+	intron:XM_024412637.1
164rev	TTTCAGGAGAAGAAGAGGAAAGG	TCTCAGAAGAGGAAGAGGAAGGA	.*....*...*.........	3	0.202595	0.0386905	NC_037117.1	6139176	6139198	+	intron:XM_024382642.1
164rev	TTTCAGGAGAAGAAGAGGAAAGG	TGTCAGGAGAAGCAGAGGCAGGG	.*..........*.....*.	3	0.4085	0.036588	NC_037116.1	10850348	10850370	+	intron:XM_024381844.1
164rev	TTTCAGGAGAAGAAGAGGAAAGG	TCCCAGGAGAAGAAGAGGGAGAG	.**...............*.	3	0.208156	0.0357143	NC_037105.1	15320637	15320659	-	intergenic:XR_002954588.1/XM_024431184.1-LOC112257277
164rev	TTTCAGGAGAAGAAGAGGAAAGG	TTACAGCAGTAGAAGAGGAAGGA	..*...*..*..........	3	0.315515	0.0300902	NC_037101.1	57983589	57983611	+	intron:XM_024422533.1
164rev	TTTCAGGAGAAGAAGAGGAAAGG	TAGCAGAAGAAGAAGAGGAAGGA	.**...*.............	3	0.326828	0.0293803	NW_020128806.1	696215	696237	+	intron:LOC112232686
164rev	TTTCAGGAGAAGAAGAGGAAAGG	TAGCAGAAGAAGAAGAGGAAGGA	.**...*.............	3	0.326828	0.0293803	NC_037112.1	5375871	5375893	+	intron:LOC112215333
164rev	TTTCAGGAGAAGAAGAGGAAAGG	TTGAAGAAGAAGAAGAGGAAGGA	..**..*.............	3	0.326828	0.0292398	NW_020128964.1	936365	936387	+	intergenic:XM_024404575.1/XM_024404574.1/XM_024404577.1-Gap
164rev	TTTCAGGAGAAGAAGAGGAAAGG	TTGAAGAAGAAGAAGAGGAAGGA	..**..*.............	3	0.326828	0.0292398	NW_020128964.1	51197	51219	-	intergenic:Gap-XM_024404558.1
164rev	TTTCAGGAGAAGAAGAGGAAAGG	TTTTCAGAGAAGAAGAGGAATGA	...***..............	3	0.280708	0.0277778	NC_037097.1	94630505	94630527	+	intergenic:XM_024436863.1-XM_024435091.1/XM_024435082.1/XM_024435072.1
164rev	TTTCAGGAGAAGAAGAGGAAAGG	CTGCAGGAGAAGAAGAAGAATGA	*.*.............*...	3	0.254412	0.0277778	NW_020128988.1	48682	48704	-	intron:XM_024404749.1
164rev	TTTCAGGAGAAGAAGAGGAAAGG	CTGCAGGAGAAGAAGAAGAATGA	*.*.............*...	3	0.254412	0.0277778	NW_020128988.1	39063	39085	-	intron:XM_024404749.1
164rev	TTTCAGGAGAAGAAGAGGAAAGG	GTTCAGCAGAAGAAGAGGATTGA	*.....*............*	3	0.20382	0.0274004	NC_037116.1	1233073	1233095	-	exon:XM_024381452.1
164rev	TTTCAGGAGAAGAAGAGGAAAGG	TGTGAGGAGAAGAAGAAGAAAGA	.*.*............*...	3	0.24262	0.0272222	NC_037109.1	11198336	11198358	+	intron:LOC112265820
164rev	TTTCAGGAGAAGAAGAGGAAAGG	TCTCAGGAGGAGCAGAGGAAGAG	.*.......*..*.......	3	0.200655	0.0259909	NC_037101.1	48901008	48901030	-	exon:XM_024420943.1/XM_024420942.1
164rev	TTTCAGGAGAAGAAGAGGAAAGG	TTACAGGTGATGAAGAGGAACAG	..*....*..*.........	3	0.292472	0.02442	NC_037106.1	51384766	51384788	-	exon:XM_024436018.1
164rev	TTTCAGGAGAAGAAGAGGAAAGG	TGGTAGGAGAAGAAGAGGAAAGA	.***................	3	0.457485	0.0233333	NW_020132009.1	29817	29839	+	intergenic:XM_024409873.1-Gap
164rev	TTTCAGGAGAAGAAGAGGAAAGG	CTTGATGAGAAGAAGAGGAAAGA	*..*.*..............	3	0.293614	0.0198413	NW_020129492.1	69325	69347	+	exon:XM_024406822.1
164rev	TTTCAGGAGAAGAAGAGGAAAGG	TCTGAGGAGAAGAAGAGGATAGA	.*.*...............*	3	0.298418	0.0178571	NC_037121.1	33933349	33933371	+	intron:XM_024387233.1
164rev	TTTCAGGAGAAGAAGAGGAAAGG	ATTGAGGAGAAGAAGAGGGAGGA	*..*..............*.	3	0.225424	0.0130208	NC_037110.1	18622211	18622233	-	intergenic:XM_024444377.1-XM_024444381.1/XM_024444380.1
164rev	TTTCAGGAGAAGAAGAGGAAAGG	ATTGAGGAGAAGAAGAGGGAGGA	*..*..............*.	3	0.225424	0.0130208	NC_037110.1	19613422	19613444	+	intergenic:XM_024444412.1/XM_024444411.1-XM_024444417.1
164rev	TTTCAGGAGAAGAAGAGGAAAGG	ATTGAGGAGAAGAAGAGGGAGGA	*..*..............*.	3	0.225424	0.0130208	NC_037109.1	37641521	37641543	+	intergenic:XM_024443540.1-XM_024442057.1
164rev	TTTCAGGAGAAGAAGAGGAAAGG	TTGCAGGAGGAGAAGAGGATCGA	..*......*.........*	3	0.253789	0.0115741	NC_037101.1	48900912	48900934	-	exon:XM_024420943.1/XM_024420942.1
164rev	TTTCAGGAGAAGAAGAGGAAAGG	TTAGAGGAGAAGAAGAGGGATGA	..**..............*.	3	0.208156	0.0093006	NC_037107.1	36159842	36159864	+	exon:XM_024437645.1/XM_024437644.1/XM_024437643.1/XM_024437642.1
164rev	TTTCAGGAGAAGAAGAGGAAAGG	TTAGAGGAGAAGAAGAGGGATGA	..**..............*.	3	0.208156	0.0093006	NW_020128847.1	754916	754938	-	exon:XM_024403121.1/XM_024403120.1/XM_024403119.1/XM_024403118.1
164rev	TTTCAGGAGAAGAAGAGGAAAGG	TTCTAGGAGAAGTAGAGGAAAGA	..**........*.......	3	0.214817	0.00714286	NW_020128804.1	5007795	5007817	+	intron:LOC112232296
164rev	TTTCAGGAGAAGAAGAGGAAAGG	TTCTAGGAGAAGTAGAGGAAAGA	..**........*.......	3	0.214817	0.00714286	NC_037108.1	52512916	52512938	-	intron:LOC112263467
164rev	TTTCAGGAGAAGAAGAGGAAAGG	TTTCAGGGGAAGAAGTTGAATGG	.......*.......**...	3	0.176959	0	NC_037098.1	24829902	24829924	+	intergenic:XM_024374061.1/XM_024374070.1/XM_024374066.1-XM_024374084.1
164rev	TTTCAGGAGAAGAAGAGGAAAGG	TTTCAGGATAAGAAACGGAATGG	........*.....**....	3	0.071637	0	NC_037111.1	22312927	22312949	+	intergenic:XM_024373388.1/XM_024373387.1-XM_024373387.1/XM_024373388.1
164rev	TTTCAGGAGAAGAAGAGGAAAGG	GATCAGGAGAAGAAGAGGAAGGG	**..................	2	5.21978	0.809365	NW_020128813.1	4280727	4280749	+	exon:XM_024400537.1
164rev	TTTCAGGAGAAGAAGAGGAAAGG	GATCAGGAGAAGAAGAGGAAGGG	**..................	2	5.21978	0.809365	NC_037127.1	29019217	29019239	-	exon:XM_024395025.1
164rev	TTTCAGGAGAAGAAGAGGAAAGG	TTTAAGGAGAAGAAAAGGAACGG	...*..........*.....	2	2.49608	0.79257	NC_037099.1	25750205	25750227	-	intergenic:XM_024399338.1/XM_024399333.1/XM_024399326.1-XM_024399333.1/XM_024399326.1
164rev	TTTCAGGAGAAGAAGAGGAAAGG	TTTAAGGAGAAGAAAAGGAACGG	...*..........*.....	2	2.49608	0.79257	NC_037099.1	30164419	30164441	+	intron:XM_024400635.1/XM_024400625.1
164rev	TTTCAGGAGAAGAAGAGGAAAGG	TTTCAGGATAAGAAAAGGAAGGG	........*.....*.....	2	1.0955	0.501961	NC_037118.1	13432414	13432436	+	intron:XM_024383649.1
164rev	TTTCAGGAGAAGAAGAGGAAAGG	TTGAAGGAGAAGAAGAGGAAGGG	..**................	2	5.1467	0.421053	NC_037115.1	36035005	36035027	-	intergenic:LOC112218965-XM_024379706.1/XM_024379705.1
164rev	TTTCAGGAGAAGAAGAGGAAAGG	TTCCAGCAGAAGAAGAGGAAGGG	..*...*.............	2	4.04915	0.294643	NC_037114.1	26760997	26761019	-	exon:XM_024377606.1
164rev	TTTCAGGAGAAGAAGAGGAAAGG	GTTCAGGAGAAGAAGAGGTAGAG	*.................*.	2	1.30109	0.133532	NC_037120.1	20731807	20731829	-	intron:XM_024387049.1
164rev	TTTCAGGAGAAGAAGAGGAAAGG	TTTCAGGATAAGAAAAGGAACAG	........*.....*.....	2	0.219099	0.130138	NC_037109.1	10307589	10307611	-	intron:XM_024441038.1/XM_024441037.1/XM_024441036.1
164rev	TTTCAGGAGAAGAAGAGGAAAGG	TACCAGGAGAAGAAGAGGAAGAG	.**.................	2	1.02934	0.0940171	NC_037112.1	64305520	64305542	+	intron:XM_024374162.1
164rev	TTTCAGGAGAAGAAGAGGAAAGG	TTTGAGGAGAAGCAGAGGAAGAG	...*........*.......	2	0.623136	0.0272904	NW_020129138.1	68932	68954	-	intergenic:XM_024405636.1-XR_002951320.1
164rev	TTTCAGGAGAAGAAGAGGAAAGG	TTTGAGGAGAAGCAGAGGAAGAG	...*........*.......	2	0.623136	0.0272904	NC_037108.1	17922694	17922716	-	intergenic:XM_024438503.1-XR_002955405.1
164rev	TTTCAGGAGAAGAAGAGGAAAGG	TTGGAGGAGAAGAAGAGGAAGGA	..**................	2	1.02934	0.0173611	NC_037099.1	69312951	69312973	-	intergenic:XM_024409875.1-XM_024409882.1
164rev	TTTCAGGAGAAGAAGAGGAAAGG	ATTCAGGAGAAGAAGAGGAAGAG	*...................	1	20	0.259259	NC_037102.1	47392630	47392652	-	intergenic:XM_024424238.1-XM_024425375.1
169rev	GTTCATTTCAGGAGAAGAAGAGG	TGTCATTTTAGGAGAAAAAGGGG	**......*.......*...	4	0.372455	0.686	NC_037100.1	734535	734557	-	intergenic:XM_024419263.1-XM_024414798.1/XM_024414788.1/XM_024414782.1/XM_024414775.1/XM_024414805.1
169rev	GTTCATTTCAGGAGAAGAAGAGG	GATCAATTAAAGAGAAGAAGAGG	.*...*..*.*.........	4	0.293525	0.628571	NW_020130392.1	11242	11264	+	intron:XM_024408495.1
169rev	GTTCATTTCAGGAGAAGAAGAGG	CTTCATTCAAGGAGAAAAAGCGG	*......**.......*...	4	0.372455	0.571429	NW_020142679.1	543394	543416	-	intergenic:XM_024416562.1-XM_024416563.1
169rev	GTTCATTTCAGGAGAAGAAGAGG	AGTCATTTCAGAAAAAGAAGGGG	**.........*.*......	4	0.110194	0.5292	NC_037103.1	61202280	61202302	-	intergenic:XM_024427407.1-XR_002954179.1
169rev	GTTCATTTCAGGAGAAGAAGAGG	CATCATTTCAGGAGAAAAAAAGG	**..............*..*	4	0.268517	0.528846	NC_037108.1	71300274	71300296	+	intron:XM_024440786.1
169rev	GTTCATTTCAGGAGAAGAAGAGG	GTAAATTTCAGGAGAAAAAAAGG	..**............*..*	4	0.250638	0.526316	NC_037115.1	49571701	49571723	+	exon:LOC112218915
169rev	GTTCATTTCAGGAGAAGAAGAGG	TTTAATTTCAGGGGAAAAAGTGG	*..*........*...*...	4	0.235909	0.512586	NC_037120.1	2183767	2183789	-	intron:XM_024386355.1
169rev	GTTCATTTCAGGAGAAGAAGAGG	GCTAATTTCAGGAAAAAAAGAGG	.*.*.........*..*...	4	0.0908279	0.505263	NC_037098.1	50726913	50726935	+	intergenic:XM_024383444.1/XM_024383437.1-XM_024438303.1
169rev	GTTCATTTCAGGAGAAGAAGAGG	ATTTGTTTCAGAAGAAGAAGAGG	*..**......*........	4	0.703916	0.48384	NC_037109.1	24599014	24599036	-	exon:XM_024441536.1
169rev	GTTCATTTCAGGAGAAGAAGAGG	ATTTGTTTCAGAAGAAGAAGAGG	*..**......*........	4	0.703916	0.48384	NW_020128804.1	11401709	11401731	+	exon:XM_024399382.1
169rev	GTTCATTTCAGGAGAAGAAGAGG	GGTCATATCAAGGGAAGAAGAGG	.*....*...*.*.......	4	0.209884	0.479348	NC_037111.1	10561079	10561101	+	intron:XM_024374053.1
169rev	GTTCATTTCAGGAGAAGAAGAGG	ATTCATTTGTGGAGAAGAAACGG	*.......**.........*	4	0.392475	0.460872	NC_037106.1	7640407	7640429	+	intergenic:XR_002955085.1-XM_024436396.1
169rev	GTTCATTTCAGGAGAAGAAGAGG	TTTCACTTCAGGAGAAAATGGGG	*....*..........*.*.	4	0.122716	0.456876	NC_037125.1	5748010	5748032	-	intergenic:XM_024392286.1-XR_002949902.1
169rev	GTTCATTTCAGGAGAAGAAGAGG	TTTCATATCAGGAGAAAATGGGG	*.....*.........*.*.	4	0.138537	0.439744	NC_037100.1	21209023	21209045	+	intron:XM_024417312.1
169rev	GTTCATTTCAGGAGAAGAAGAGG	GTTCATTTCAGAAGAAAATATGG	...........*....*.**	4	0.0339615	0.439744	NC_037106.1	32509265	32509287	-	intron:XM_024435349.1
169rev	GTTCATTTCAGGAGAAGAAGAGG	TTTCATTTCAGGAGAAATAAGGG	*...............**.*	4	0.0526294	0.4375	NC_037107.1	22792643	22792665	-	intergenic:XR_002955185.1-XM_024437092.1
169rev	GTTCATTTCAGGAGAAGAAGAGG	TTTCATTTCAGGAGAAATAAGGG	*...............**.*	4	0.0526294	0.4375	NC_037107.1	22779781	22779803	+	intergenic:XR_002955185.1-XM_024437092.1
169rev	GTTCATTTCAGGAGAAGAAGAGG	GTTCATTGGAAGAGAAAAAGGGG	.......**.*.....*...	4	0.186789	0.423704	NW_020129192.1	218137	218159	-	intergenic:Gap-XM_024405823.1
169rev	GTTCATTTCAGGAGAAGAAGAGG	AGTCATTTAAGGGGAAGAAGGGG	**......*...*.......	4	0.355434	0.422609	NC_037109.1	55352596	55352618	+	intergenic:XM_024443595.1-XM_024443596.1
169rev	GTTCATTTCAGGAGAAGAAGAGG	AGTCATTTAAGGGGAAGAAGGGG	**......*...*.......	4	0.355434	0.422609	NW_020128842.1	1408751	1408773	+	intergenic:XM_024403029.1-XM_024403030.1
169rev	GTTCATTTCAGGAGAAGAAGAGG	TTTCATCTCAGAGGAAGAAGAGG	*.....*....**.......	4	0.19548	0.418478	NW_020129288.1	26700	26722	+	intron:XR_002951447.1
169rev	GTTCATTTCAGGAGAAGAAGAGG	GTCCATTTCAAGAGAAAAAAGGG	..*.......*.....*..*	4	0.139104	0.375	NC_037101.1	65008730	65008752	+	intron:XM_024422556.1
169rev	GTTCATTTCAGGAGAAGAAGAGG	GTTGACATCAGAAGAAGAAGGGG	...*.**....*........	4	0.277495	0.371212	NC_037126.1	26439116	26439138	+	intron:XM_024394179.1/XM_024394178.1/XM_024394177.1/XM_024394176.1/XM_024394175.1
169rev	GTTCATTTCAGGAGAAGAAGAGG	TTTCACTTGAGGAGGAGAAGAGG	*....*..*.....*.....	4	0.148915	0.365801	NW_020128808.1	1616220	1616242	-	exon:XM_024399988.1
169rev	GTTCATTTCAGGAGAAGAAGAGG	GTTAACTTTAGCAGAAGAAGTGG	...*.*..*..*........	4	0.248242	0.35463	NC_037117.1	3960214	3960236	+	intergenic:XM_024382340.1-XM_024382591.1/XM_024382590.1
169rev	GTTCATTTCAGGAGAAGAAGAGG	GTTTATTTCAGAAAAAGATGAGG	...*.......*.*....*.	4	0.0365624	0.301538	NC_037099.1	68096054	68096076	+	intergenic:XM_024409474.1/XM_024409470.1/XM_024409462.1-XM_024409575.1
169rev	GTTCATTTCAGGAGAAGAAGAGG	GTTAAGTTGAAGAGAAGAAGTGG	...*.*..*.*.........	4	0.28003	0.297888	NC_037105.1	64445629	64445651	-	intron:LOC112258295
169rev	GTTCATTTCAGGAGAAGAAGAGG	GTTCATCTTTGGAGAAGAACTGG	......*.**.........*	4	0.240915	0.227482	NW_020142522.1	3812710	3812732	+	exon:XM_024414456.1/XM_024414454.1
169rev	GTTCATTTCAGGAGAAGAAGAGG	GTTCATCTTTGGAGAAGAACTGG	......*.**.........*	4	0.240915	0.227482	NC_037099.1	20679708	20679730	-	exon:XM_024397613.1
169rev	GTTCATTTCAGGAGAAGAAGAGG	GTTCATCTTTGGAGAAGAACTGG	......*.**.........*	4	0.240915	0.227482	NW_020142522.1	3831796	3831818	+	exon:XM_024414457.1
169rev	GTTCATTTCAGGAGAAGAAGAGG	GTTCATCTTTGGAGAAGAACTGG	......*.**.........*	4	0.240915	0.227482	NC_037099.1	20698794	20698816	-	exon:XM_024397656.1/XM_024397646.1
169rev	GTTCATTTCAGGAGAAGAAGAGG	CATCATTTCAGGAGAAGGAACGG	**...............*.*	4	0.1367	0.226648	NC_037112.1	18257303	18257325	+	intergenic:XM_024374706.1-XM_024374711.1/XM_024374710.1/XM_024374717.1/XM_024374716.1/XM_024374715.1/XM_024374714.1/XM_024374713.1/XM_024374712.1/XM_024374709.1/XM_024374708.1
169rev	GTTCATTTCAGGAGAAGAAGAGG	GCTTATTTTAGGAGAAGAGGTGG	.*.*....*.........*.	4	0.304736	0.225	NC_037112.1	19066325	19066347	-	intron:XM_024374727.1/XM_024374726.1/XM_024374725.1
169rev	GTTCATTTCAGGAGAAGAAGAGG	TTCCATTACAGGAGGAGAAGTGG	*.*....*......*.....	4	0.397208	0.222857	NW_020128839.1	1064310	1064332	+	exon:XM_024402792.1
169rev	GTTCATTTCAGGAGAAGAAGAGG	TTCCATTACAGGAGGAGAAGTGG	*.*....*......*.....	4	0.397208	0.222857	NW_020128835.1	751318	751340	-	exon:XM_024402667.1
169rev	GTTCATTTCAGGAGAAGAAGAGG	ATCCACTTGAGGAGAAGAAGAGG	*.*..*..*...........	4	0.497494	0.217069	NC_037098.1	1836998	1837020	-	intergenic:XM_024384985.1-XM_024440204.1
169rev	GTTCATTTCAGGAGAAGAAGAGG	GTTGATTTGAGAAAAAGAAGAGG	...*....*..*.*......	4	0.0640838	0.216667	NC_037120.1	3251728	3251750	+	intergenic:XM_024386365.1-LOC112223223
169rev	GTTCATTTCAGGAGAAGAAGAGG	GAGCAGTTCTGGAGAAGAAGAGG	.**..*...*..........	4	0.749905	0.213316	NW_020142715.1	30382	30404	-	intergenic:Gap-XM_024416690.1
169rev	GTTCATTTCAGGAGAAGAAGAGG	TTTCATTACAGGAGGAGGAGGGG	*......*......*..*..	4	0.0831693	0.208	NC_037111.1	37130752	37130774	+	intergenic:XR_002948185.1-XM_024373935.1
169rev	GTTCATTTCAGGAGAAGAAGAGG	GTTAATTTCAGGATAAAAAAGGG	...*.........*..*..*	4	0.0378752	0.196491	NC_037127.1	21575339	21575361	+	intron:XM_024395102.1
169rev	GTTCATTTCAGGAGAAGAAGAGG	GCTGATCTCAGGAGGAGAAGTGG	.*.*..*.......*.....	4	0.275145	0.191518	NC_037110.1	48766562	48766584	+	intergenic:XM_024445710.1-XM_024445711.1
169rev	GTTCATTTCAGGAGAAGAAGAGG	GATCATTACAGGGGAAGAACCGG	.*.....*....*......*	4	0.269912	0.189202	NC_037118.1	8967000	8967022	+	intron:XM_024383938.1
169rev	GTTCATTTCAGGAGAAGAAGAGG	GATCATTACAGGGGAAGAACAGG	.*.....*....*......*	4	0.269912	0.189202	NC_037118.1	8966418	8966440	+	intron:XM_024383938.1
169rev	GTTCATTTCAGGAGAAGAAGAGG	CTTCGTTTCAGCGGAAGAAGGGG	*...*......**.......	4	0.286209	0.177567	NC_037106.1	20225863	20225885	+	intergenic:XM_024434956.1/XM_024434955.1-XM_024434956.1
169rev	GTTCATTTCAGGAGAAGAAGAGG	GTTGAATTCAGGACAAAAAGTGG	...*.*.......*..*...	4	0.0521686	0.173333	NC_037102.1	40215716	40215738	+	intergenic:XM_024424044.1-XM_024424046.1
169rev	GTTCATTTCAGGAGAAGAAGAGG	GTTCCTAGCAGGAGAAGTAGGGG	....*.**.........*..	4	0.201226	0.160417	NC_037098.1	13907864	13907886	+	intron:XM_024444790.1/XM_024444781.1
169rev	GTTCATTTCAGGAGAAGAAGAGG	CATCATCTCATGAGAAGAAGTGG	**....*...*.........	4	0.542337	0.159816	NC_037121.1	23482735	23482757	-	intergenic:XM_024388093.1-XM_024387303.1
169rev	GTTCATTTCAGGAGAAGAAGAGG	GTTCATTGGAGGAGGAGATGGGG	.......**.....*...*.	4	0.0737976	0.158889	NC_037115.1	54955997	54956019	+	intergenic:LOC112218964-Gap
169rev	GTTCATTTCAGGAGAAGAAGAGG	GTTCATGAAAGTAGAAGAAGAGG	......***..*........	4	0.267929	0.155139	NC_037108.1	3817671	3817693	-	intergenic:XM_024438133.1-XM_024440535.1
169rev	GTTCATTTCAGGAGAAGAAGAGG	TTTCATTTCAGTACAAAAAGAGG	*..........*.*..*...	4	0.0446873	0.153846	NC_037105.1	55078116	55078138	+	exon:XM_024432374.1
169rev	GTTCATTTCAGGAGAAGAAGAGG	TTTCATTTCAGTACAAAAAGAGG	*..........*.*..*...	4	0.0446873	0.153846	NC_037105.1	42851883	42851905	+	exon:XM_024432107.1
169rev	GTTCATTTCAGGAGAAGAAGAGG	GATCATTCCAGGACAAGGAGAGG	.*.....*.....*...*..	4	0.0462397	0.145055	NC_037103.1	19762621	19762643	-	intron:XM_024426147.1/XM_024426146.1/XM_024426145.1
169rev	GTTCATTTCAGGAGAAGAAGAGG	GTGGATATCAGGAGGAGAAGTGG	..**..*.......*.....	4	0.271293	0.142187	NW_020129712.1	167930	167952	-	intergenic:XM_024407337.1-Gap
169rev	GTTCATTTCAGGAGAAGAAGAGG	ATTCATTACAGGTGGAGAAGAGG	*......*....*.*.....	4	0.155902	0.1404	NC_037109.1	20636191	20636213	-	intron:XM_024441396.1/XM_024441395.1/XM_024441394.1
169rev	GTTCATTTCAGGAGAAGAAGAGG	GTTCACTTCTGGAGAATAATAGG	.....*...*......*..*	4	0.134468	0.140374	NC_037107.1	14400587	14400609	+	intergenic:XR_002955176.1/XR_002955175.1/XR_002955174.1/XR_002955173.1/XM_024436834.1/XM_024436833.1/XM_024436832.1/XM_024436831.1/XM_024436829.1/XM_024436828.1/XM_024436827.1-XR_002955176.1/XR_002955175.1/XR_002955174.1/XR_002955173.1/XM_024436838.1/XM_024436834.1/XM_024436833.1/XM_024436832.1/XM_024436831.1/XM_024436830.1/XM_024436829.1/XM_024436828.1/XM_024436827.1
169rev	GTTCATTTCAGGAGAAGAAGAGG	GTTCATTTGAGAAGAATAAAAGG	........*..*....*..*	4	0.0690492	0.135417	NC_037100.1	68455824	68455846	+	intron:XM_024419391.1
169rev	GTTCATTTCAGGAGAAGAAGAGG	GATCAGTTCAGATGAAGAAGAGG	.*...*.....**.......	4	0.164811	0.135385	NW_020128823.1	1218108	1218130	+	intergenic:XM_024401735.1/XM_024401734.1-XM_024401736.1
169rev	GTTCATTTCAGGAGAAGAAGAGG	GATCAGTTCAGATGAAGAAGAGG	.*...*.....**.......	4	0.164811	0.135385	NW_020128808.1	359632	359654	-	intergenic:XM_024399953.1-XM_024399956.1/XM_024399954.1
169rev	GTTCATTTCAGGAGAAGAAGAGG	GTTCATTTCAAGAAAGGAAATGG	..........*..*.*...*	4	0.00848593	0.135216	NC_037126.1	8447107	8447129	-	intron:XM_024393566.1/XM_024393565.1
169rev	GTTCATTTCAGGAGAAGAAGAGG	GTGCCTTCCAGGAGAAGATGTGG	..*.*..*..........*.	4	0.491768	0.134615	NC_037099.1	9361492	9361514	+	exon:XM_024392791.1/XM_024392784.1
169rev	GTTCATTTCAGGAGAAGAAGAGG	GTTTATACCAGGAGAGGAAGGGG	...*..**.......*....	4	0.176586	0.134615	NC_037114.1	36505135	36505157	+	intergenic:XM_024378564.1/XM_024378563.1/XM_024378562.1/XM_024378561.1/XM_024378560.1-XM_024378565.1
169rev	GTTCATTTCAGGAGAAGAAGAGG	GTTTATACCAGGAGAGGAAGGGG	...*..**.......*....	4	0.176586	0.134615	NC_037114.1	36505188	36505210	+	intergenic:XM_024378564.1/XM_024378563.1/XM_024378562.1/XM_024378561.1/XM_024378560.1-XM_024378565.1
169rev	GTTCATTTCAGGAGAAGAAGAGG	GTTCACTTTATGACAAGAAGAGG	.....*..*.*..*......	4	0.0417244	0.131119	NC_037129.1	5776351	5776373	-	intron:XM_024397137.1/XM_024397136.1/XM_024397135.1
169rev	GTTCATTTCAGGAGAAGAAGAGG	GTTCACTTTATGACAAGAAGAGG	.....*..*.*..*......	4	0.0417244	0.131119	NC_037129.1	5767346	5767368	-	intron:XM_024397137.1/XM_024397136.1/XM_024397135.1
169rev	GTTCATTTCAGGAGAAGAAGAGG	GTCCATTTGAGCAGAAAAAGAGG	..*.....*..*....*...	4	0.171534	0.131092	NC_037104.1	12374664	12374686	-	intron:XM_024428975.1
169rev	GTTCATTTCAGGAGAAGAAGAGG	GTACAGTACAGGAGAAGGAGAGG	..*..*.*.........*..	4	0.185123	0.130612	NC_037106.1	18082694	18082716	-	intergenic:XM_024434936.1/XM_024434937.1-XM_024434938.1
169rev	GTTCATTTCAGGAGAAGAAGAGG	GAACAGTTCAGGAGAAGAGGGGG	.**..*............*.	4	0.297519	0.129513	NC_037102.1	75323505	75323527	-	intergenic:XM_024425508.1-XR_002954016.1
169rev	GTTCATTTCAGGAGAAGAAGAGG	TTTCATGTCAGGAGAAGGTGAGG	*.....*..........**.	4	0.0705282	0.126697	NC_037119.1	12913786	12913808	+	intergenic:XM_024385884.1-XM_024385887.1/XM_024385886.1/XM_024385885.1/XM_024385882.1/XM_024385881.1/XM_024385880.1/XM_024385879.1
169rev	GTTCATTTCAGGAGAAGAAGAGG	GTACATTTCAGAAGTAAAAGAGG	..*........*..*.*...	4	0.0752392	0.124444	NC_037097.1	21255882	21255904	+	intron:XM_024416648.1/XM_024416591.1/XM_024416529.1
169rev	GTTCATTTCAGGAGAAGAAGAGG	CTGCATTTGGGGAGAAGAAGAGG	*.*.....**..........	4	0.793841	0.122827	NC_037098.1	50906261	50906283	+	intergenic:XM_024438344.1-XR_002949011.1
169rev	GTTCATTTCAGGAGAAGAAGAGG	GTTTCTTTCAAGTGAAGAAGAGG	...**.....*.*.......	4	0.307298	0.12	NC_037099.1	60118757	60118779	-	intergenic:XM_024407623.1-XM_024407623.1/XM_024407593.1/XM_024407557.1
169rev	GTTCATTTCAGGAGAAGAAGAGG	ATTCATTTTAGGAGAAGGGGGGG	*.......*........**.	4	0.0630933	0.118125	NC_037118.1	10919004	10919026	-	intergenic:XM_024384061.1-XM_024384062.1
169rev	GTTCATTTCAGGAGAAGAAGAGG	GTAAATTCCAGGAGAGGAAGTGG	..**...*.......*....	4	0.254925	0.115674	NC_037106.1	27335211	27335233	+	intergenic:XM_024435141.1-XM_024435147.1/XM_024435146.1/XM_024435144.1/XM_024435143.1
169rev	GTTCATTTCAGGAGAAGAAGAGG	GTCTATTTCTGGAGAAGAGGAGG	..**.....*........*.	4	0.452918	0.113445	NC_037103.1	81422761	81422783	-	intron:XM_024428123.1/XM_024428122.1
169rev	GTTCATTTCAGGAGAAGAAGAGG	GTCTATTTCTGGAGAAGAGGAGG	..**.....*........*.	4	0.452918	0.113445	NW_020142532.1	1133316	1133338	+	intron:XM_024414577.1/XM_024414576.1
169rev	GTTCATTTCAGGAGAAGAAGAGG	GTTCATCTCTGAAGTAGAAGTGG	......*..*.*..*.....	4	0.113213	0.113235	NC_037118.1	8603514	8603536	+	exon:XM_024383924.1/XM_024383923.1/XM_024383922.1/XM_024383921.1/XM_024383920.1
169rev	GTTCATTTCAGGAGAAGAAGAGG	GGTCAGTTAAGGATAAGAAGTGG	.*...*..*....*......	4	0.0827922	0.109714	NC_037102.1	21052296	21052318	+	intron:XM_024423440.1
169rev	GTTCATTTCAGGAGAAGAAGAGG	CTCCATTTCAGAAGAAGAGGAGG	*.*........*......*.	4	0.255581	0.107143	NC_037115.1	50503079	50503101	-	intergenic:XR_002948697.1-LOC112219045
169rev	GTTCATTTCAGGAGAAGAAGAGG	CTTTCTTTCAGGAGAAGAGGGGG	*..**.............*.	4	0.526849	0.107143	NC_037128.1	7718165	7718187	-	intergenic:XM_024396596.1-XM_024396324.1
169rev	GTTCATTTCAGGAGAAGAAGAGG	CTTTCTTTCAGGAGAAGAGGGGG	*..**.............*.	4	0.526849	0.107143	NC_037098.1	6950336	6950358	-	intergenic:XM_024442000.1-XM_024442018.1/XM_024442009.1
169rev	GTTCATTTCAGGAGAAGAAGAGG	CTTTCTTTCAGGAGAAGAGGGGG	*..**.............*.	4	0.526849	0.107143	NW_020142512.1	6017471	6017493	-	intergenic:XM_024413679.1-XM_024414031.1/XM_024414030.1
169rev	GTTCATTTCAGGAGAAGAAGAGG	GTTAATTTCAGGAGAAACATGGG	...*............**.*	4	0.0498225	0.104795	NC_037103.1	79418507	79418529	+	intergenic:XM_024428072.1/XM_024428070.1/XM_024428071.1-XM_024428072.1/XM_024428071.1/XM_024428070.1
169rev	GTTCATTTCAGGAGAAGAAGAGG	GTTCAGTTCAGGAGGAGGATGGG	.....*........*..*.*	4	0.01992	0.104	NW_020128842.1	751681	751703	+	intergenic:LOC112234742-XM_024402980.1/XM_024402981.1/XM_024402979.1/XM_024402977.1
169rev	GTTCATTTCAGGAGAAGAAGAGG	CTTCATGTCGGGAGAAGGAGCGG	*.....*..*.......*..	4	0.195213	0.0933707	NC_037127.1	21841982	21842004	+	intergenic:XR_002950210.1-XM_024395619.1/XM_024395618.1
169rev	GTTCATTTCAGGAGAAGAAGAGG	GTTCATTATAGGAGGGGAAGAGG	.......**.....**....	4	0.0384431	0.0875	NW_020129393.1	93675	93697	+	intergenic:XM_024406608.1-XM_024406607.1
169rev	GTTCATTTCAGGAGAAGAAGAGG	GTTCATAAGAGGAGTAGAAGAGG	......***.....*.....	4	0.152655	0.0866667	NC_037102.1	46565776	46565798	-	exon:XM_024424209.1
169rev	GTTCATTTCAGGAGAAGAAGAGG	GCCCATGTCAGGAGAAGGAGCGG	.**...*..........*..	4	0.20899	0.0864346	NC_037102.1	37117196	37117218	-	intergenic:XM_024423891.1-XM_024423890.1
169rev	GTTCATTTCAGGAGAAGAAGAGG	CTTCATCTCAGGATGAGAAGAGG	*.....*......**.....	4	0.0409966	0.085119	NC_037101.1	3194318	3194340	+	intergenic:XM_024419598.1/XM_024419597.1/XM_024419596.1-XM_024419597.1/XM_024419596.1/XM_024419598.1
169rev	GTTCATTTCAGGAGAAGAAGAGG	GCTCATCTCAGGAAAAGCAGAGG	.*....*......*...*..	4	0.0315817	0.0841837	NC_037100.1	34000033	34000055	-	intron:XM_024417849.1
169rev	GTTCATTTCAGGAGAAGAAGAGG	CTTCCTGTCAGGAGAAGGAGGGG	*...*.*..........*..	4	0.211958	0.0840336	NW_020129029.1	25517	25539	-	intergenic:XR_002951232.1-LOC112236425
169rev	GTTCATTTCAGGAGAAGAAGAGG	CTTCATTTCAGAGGAGGAAGGGG	*..........**..*....	4	0.0518534	0.083612	NC_037122.1	45674667	45674689	+	intergenic:XM_024389827.1/XM_024389826.1/XM_024389825.1/XM_024389824.1-XM_024388506.1
169rev	GTTCATTTCAGGAGAAGAAGAGG	GATCTTTTCATGAGAAGAATGGG	.*..*.....*........*	4	0.387083	0.0828402	NW_020130284.1	105105	105127	-	exon:XR_002951940.1/XR_002951939.1
169rev	GTTCATTTCAGGAGAAGAAGAGG	ATGTATTTCTGGAGAAGAAGCAG	*.**.....*..........	4	0.25985	0.0823529	NC_037101.1	42307037	42307059	-	intergenic:LOC112251520-XM_024420834.1
169rev	GTTCATTTCAGGAGAAGAAGAGG	GATGATTCCAGGAGAAGCAGAGG	.*.*...*.........*..	4	0.310333	0.0805861	NC_037099.1	76291423	76291445	+	intergenic:XM_024410943.1/XM_024410937.1-XM_024411050.1/XM_024411042.1/XM_024411035.1/XM_024411029.1/XM_024411022.1
169rev	GTTCATTTCAGGAGAAGAAGAGG	GTGCACTTCAGGGTAAGAAGTGG	..*..*......**......	4	0.0492136	0.0790514	NC_037103.1	41702658	41702680	-	exon:LOC112254315
169rev	GTTCATTTCAGGAGAAGAAGAGG	CTCCATGTCAGGAGAAGGAGCGG	*.*...*..........*..	4	0.20899	0.0720288	NC_037124.1	8374326	8374348	+	intergenic:XR_002949772.1/XR_002949773.1-XR_002949773.1
169rev	GTTCATTTCAGGAGAAGAAGAGG	CTCCATGTCAGGAGAAGGAGCGG	*.*...*..........*..	4	0.20899	0.0720288	NC_037124.1	7212324	7212346	+	intergenic:XR_002949768.1/XR_002949769.1-XR_002949769.1
169rev	GTTCATTTCAGGAGAAGAAGAGG	GTTGATGTCAGGGGAAGAGGAGG	...*..*.....*.....*.	4	0.13183	0.0719309	NC_037124.1	9203835	9203857	+	intergenic:XM_024391150.1-XR_002949774.1
169rev	GTTCATTTCAGGAGAAGAAGAGG	GTTCATAACATGATAAGAAGTGG	......**..*..*......	4	0.0770929	0.0717949	NC_037100.1	69758865	69758887	+	intergenic:XM_024419168.1/XM_024419167.1-XM_024419156.1
169rev	GTTCATTTCAGGAGAAGAAGAGG	GCTGATTTAAGGAGAGGAAGAGG	.*.*....*......*....	4	0.157971	0.0706436	NC_037105.1	14252740	14252762	+	intron:LOC112257271
169rev	GTTCATTTCAGGAGAAGAAGAGG	GTTCATTTCATGAGAAAACACGG	..........*.....*.**	4	0.0401565	0.0696286	NC_037103.1	4738608	4738630	-	intergenic:XM_024425683.1-XM_024425684.1
169rev	GTTCATTTCAGGAGAAGAAGAGG	TTTCAGGTCAGGAGAAGACGAGG	*....**...........*.	4	0.217702	0.0695451	NW_020128807.1	292550	292572	+	exon:XM_024399914.1/XM_024399912.1/XM_024399911.1
169rev	GTTCATTTCAGGAGAAGAAGAGG	GTTTTTGTCAGGAGAAGGAGAGG	...**.*..........*..	4	0.201226	0.0684492	NW_020142643.1	455729	455751	-	intergenic:XM_024416403.1-Gap
169rev	GTTCATTTCAGGAGAAGAAGAGG	GTTCACTTCAGACGAAGAGGAGG	.....*.....**.....*.	4	0.0545442	0.0669856	NC_037115.1	12725687	12725709	+	intergenic:LOC112218349-XM_024380392.1
169rev	GTTCATTTCAGGAGAAGAAGAGG	GTCCATTTGAGTGGAAGAAGAGG	..*.....*..**.......	4	0.164116	0.0665484	NC_037104.1	63392970	63392992	+	intron:XM_024430427.1
169rev	GTTCATTTCAGGAGAAGAAGAGG	GATCATTTCACGAGAGAAAGAGG	.*........*....**...	4	0.0581908	0.0650888	NC_037107.1	1483003	1483025	+	intergenic:XM_024436537.1-XM_024437946.1
169rev	GTTCATTTCAGGAGAAGAAGAGG	GGTCATTTGAGGAGGGGAAGGGG	.*......*.....**....	4	0.0423361	0.065	NC_037106.1	26283006	26283028	-	intergenic:XM_024436420.1-XM_024435099.1
169rev	GTTCATTTCAGGAGAAGAAGAGG	GTTCATTAGAGGGGTAGAAGAGG	.......**...*.*.....	4	0.0864971	0.0645963	NC_037115.1	50023484	50023506	-	exon:XM_024380170.1
169rev	GTTCATTTCAGGAGAAGAAGAGG	GTTCAGTTCAGATGAAGGAGAGG	.....*.....**....*..	4	0.0339386	0.064	NW_020130063.1	75275	75297	+	intergenic:LOC112239549-Gap
169rev	GTTCATTTCAGGAGAAGAAGAGG	GGTCATTTCAGCAGAGGAATGGG	.*.........*...*...*	4	0.0590208	0.0598643	NC_037110.1	36446318	36446340	+	intergenic:XM_024445134.1-XR_002956049.1
169rev	GTTCATTTCAGGAGAAGAAGAGG	GTAGATTTCATGACAAGAAGCGG	..**......*..*......	4	0.116657	0.0588697	NC_037101.1	7464751	7464773	-	intergenic:XM_024419728.1-XR_002953460.1/XR_002953459.1/XR_002953458.1/XM_024419729.1
169rev	GTTCATTTCAGGAGAAGAAGAGG	GTTCATGTCGGGAAAACAAGAGG	......*..*...*..*...	4	0.0516277	0.0576701	NC_037123.1	1284164	1284186	-	intergenic:XM_024390012.1-XM_024390013.1/XM_024390014.1
169rev	GTTCATTTCAGGAGAAGAAGAGG	GTGGAGTTCAGTAGAAGAAGGGG	..**.*.....*........	4	0.419907	0.0549451	NW_020142510.1	17359544	17359566	-	intron:XM_024413526.1
169rev	GTTCATTTCAGGAGAAGAAGAGG	GTGGAGTTCAGTAGAAGAAGGGG	..**.*.....*........	4	0.419907	0.0549451	NC_037102.1	26735363	26735385	+	intron:XM_024423621.1
169rev	GTTCATTTCAGGAGAAGAAGAGG	GTCCATTCCCGGAGAAGAGGGGG	..*....*.*........*.	4	0.452918	0.0535714	NC_037112.1	27057082	27057104	-	intergenic:rna39503-XM_024376550.1
169rev	GTTCATTTCAGGAGAAGAAGAGG	GTTGATGTCAGGAGAGGAAAAGG	...*..*........*...*	4	0.0775635	0.053026	NC_037121.1	34589878	34589900	+	intron:XM_024387236.1
169rev	GTTCATTTCAGGAGAAGAAGAGG	GTTCAGTTCAGCATGAGAAGAGG	.....*.....*.**.....	4	0.0170058	0.052437	NC_037123.1	17358649	17358671	-	intron:XM_024390696.1/XM_024390695.1/XM_024390694.1/XM_024390693.1
169rev	GTTCATTTCAGGAGAAGAAGAGG	GTTCAGTTCAGCATGAGAAGAGG	.....*.....*.**.....	4	0.0170058	0.052437	NC_037105.1	82540610	82540632	+	intron:XM_024433957.1
169rev	GTTCATTTCAGGAGAAGAAGAGG	GATCATTTGAGGAGAATGAGAGG	.*......*.......**..	4	0.0730013	0.052381	NW_020129117.1	185280	185302	+	intergenic:XM_024405453.1-LOC112236853
169rev	GTTCATTTCAGGAGAAGAAGAGG	AAACTTTTCAGGAGAAGAAGGAG	***.*...............	4	0.257335	0.0512821	NC_037112.1	57898896	57898918	+	intergenic:XM_024376600.1-XM_024374146.1
169rev	GTTCATTTCAGGAGAAGAAGAGG	GTTGAGGTCAGGTGAAGAAGAGG	...*.**.....*.......	4	0.228793	0.0504202	NC_037124.1	39291250	39291272	+	exon:LOC112226422
169rev	GTTCATTTCAGGAGAAGAAGAGG	GTTCCTGTCTGGAGAGGAAGGGG	....*.*..*.....*....	4	0.154798	0.0499068	NW_020129238.1	68481	68503	-	intergenic:XM_024406004.1-XM_024406005.1
169rev	GTTCATTTCAGGAGAAGAAGAGG	GTTCCTGTCTGGAGAGGAAGGGG	....*.*..*.....*....	4	0.154798	0.0499068	NC_037118.1	37249234	37249256	+	exon:LOC112221350
169rev	GTTCATTTCAGGAGAAGAAGAGG	GTTCCTGTCTGGAGAGGAAGGGG	....*.*..*.....*....	4	0.154798	0.0499068	NW_020129238.1	44602	44624	+	exon:XM_024406004.1
169rev	GTTCATTTCAGGAGAAGAAGAGG	CTCCATTTCAGGCAAAGAAGAGG	*.*.........**......	4	0.0854635	0.0483351	NW_020128880.1	123777	123799	-	exon:XR_002951045.1
169rev	GTTCATTTCAGGAGAAGAAGAGG	GTTCATTTCATGGTGAGAAGAGG	..........*.***.....	4	0.0111922	0.0434783	NC_037112.1	18732334	18732356	+	intergenic:XM_024374719.1-XM_024374720.1
169rev	GTTCATTTCAGGAGAAGAAGAGG	GTGGACTTCAGGAGAAGCAGAGG	..**.*...........*..	4	0.185123	0.04329	NC_037123.1	12644003	12644025	+	intergenic:LOC112225758-XM_024390545.1
169rev	GTTCATTTCAGGAGAAGAAGAGG	GAGCATTTCAGCAGAGGAAGAGG	.**........*...*....	4	0.125423	0.0430734	NC_037109.1	20894136	20894158	-	intergenic:XM_024441408.1-XM_024441410.1/XM_024441409.1
169rev	GTTCATTTCAGGAGAAGAAGAGG	GTTGATTACAGCAGTAGAAGAGG	...*...*...*..*.....	4	0.188649	0.0423529	NC_037101.1	57983584	57983606	+	intron:XM_024422533.1
169rev	GTTCATTTCAGGAGAAGAAGAGG	GGTCTTGTCAGGAGAACAAGTGG	.*..*.*.........*...	4	0.416345	0.0422774	NC_037104.1	19157330	19157352	-	exon:LOC112255684
169rev	GTTCATTTCAGGAGAAGAAGAGG	GGTCAGTTCAGGACAGGAAGTGG	.*...*.......*.*....	4	0.0233065	0.0395604	NW_020129021.1	75172	75194	-	intron:XM_024404938.1
169rev	GTTCATTTCAGGAGAAGAAGAGG	GTTCATTTTAGGAGAATCAAAGG	........*.......**.*	4	0.0275074	0.0390625	NC_037101.1	91400455	91400477	-	intergenic:XM_024422795.1-LOC112251668
169rev	GTTCATTTCAGGAGAAGAAGAGG	GTTCATTTCAGCAGAGGGAACGG	...........*...*.*.*	4	0.00944061	0.0381787	NW_020142580.1	509580	509602	-	intergenic:XM_024415812.1-XM_024415810.1
169rev	GTTCATTTCAGGAGAAGAAGAGG	GTTCATTTCAGCAGAGGGAACGG	...........*...*.*.*	4	0.00944061	0.0381787	NC_037119.1	10993830	10993852	-	intergenic:XM_024385794.1-XM_024385352.1
169rev	GTTCATTTCAGGAGAAGAAGAGG	CTTCATTTCAGGTGAATAATCGG	*...........*...*..*	4	0.103916	0.0375	NC_037102.1	65338115	65338137	+	intergenic:XM_024424916.1-XM_024424917.1
169rev	GTTCATTTCAGGAGAAGAAGAGG	GTTCTGGTCAGGTGAAGAAGGGG	....***.....*.......	4	0.218274	0.0366692	NW_020142709.1	107380	107402	+	intergenic:XM_024416668.1-Gap
169rev	GTTCATTTCAGGAGAAGAAGAGG	ATCCATTTCAGGAGTAGAACAGG	*.*...........*....*	4	0.184299	0.0330612	NW_020129104.1	312445	312467	-	intron:LOC112236795
169rev	GTTCATTTCAGGAGAAGAAGAGG	GTTCCTTACAGGAGAGGAACAGG	....*..*.......*...*	4	0.113563	0.032967	NC_037109.1	18621305	18621327	-	exon:XM_024443504.1
169rev	GTTCATTTCAGGAGAAGAAGAGG	GTTCATTCCAGGAGTACAATAGG	.......*......*.*..*	4	0.0646752	0.0329412	NC_037106.1	47318109	47318131	+	intron:XM_024435839.1/XM_024435838.1/XM_024435837.1/XM_024435836.1/XM_024435835.1/XM_024435834.1/XM_024435832.1/XM_024435831.1
169rev	GTTCATTTCAGGAGAAGAAGAGG	GTTCATTCCAGGAGTACAATAGG	.......*......*.*..*	4	0.0646752	0.0329412	NW_020142630.1	537160	537182	+	intron:XM_024416271.1/XM_024416270.1/XM_024416269.1/XM_024416268.1/XM_024416267.1/XM_024416266.1/XM_024416265.1/XM_024416264.1
169rev	GTTCATTTCAGGAGAAGAAGAGG	GTTGTTTTCAGGAGAAGCAAGGG	...**............*.*	4	0.129409	0.0324675	NC_037097.1	40918906	40918928	+	intergenic:XM_024421544.1-XM_024417872.1
169rev	GTTCATTTCAGGAGAAGAAGAGG	GTTCATTGCAGCACAGGAAGTGG	.......*...*.*.*....	4	0.0172105	0.0319974	NC_037098.1	41431642	41431664	+	intron:XM_024380426.1/XM_024380424.1/XM_024380423.1
169rev	GTTCATTTCAGGAGAAGAAGAGG	TTGCATTCCTGGAGAAGAAGTGA	*.*....*.*..........	4	0.25985	0.0306373	NC_037097.1	25939276	25939298	-	intergenic:XM_024400872.1/XM_024400092.1-XM_024418399.1
169rev	GTTCATTTCAGGAGAAGAAGAGG	GTTCATGTCAAGAGTACAAGTGG	......*...*...*.*...	4	0.0559583	0.0276817	NC_037105.1	17244554	17244576	+	intergenic:XM_024431236.1-XM_024431237.1
169rev	GTTCATTTCAGGAGAAGAAGAGG	GTTGATTTGAGGAGTAGGAGAGG	...*....*.....*..*..	4	0.0482435	0.0247619	NW_020129355.1	215617	215639	-	intron:LOC112237854
169rev	GTTCATTTCAGGAGAAGAAGAGG	GTTCATTACAGTAGAGGGAGAGG	.......*...*...*.*..	4	0.0237304	0.0236686	NC_037114.1	25159106	25159128	-	intron:XM_024377602.1
169rev	GTTCATTTCAGGAGAAGAAGAGG	GTTCATTACAGTAGAGGGAGAGG	.......*...*...*.*..	4	0.0237304	0.0236686	NC_037114.1	22463023	22463045	-	intron:XM_024377596.1
169rev	GTTCATTTCAGGAGAAGAAGAGG	GTTCACTTCAGGTTCAGAAGAGG	.....*......***.....	4	0.0133765	0.0198347	NW_020142588.1	7054	7076	-	intergenic:Gap-LOC112247213
169rev	GTTCATTTCAGGAGAAGAAGAGG	GTTCACTTCAGGTTCAGAAGAGG	.....*......***.....	4	0.0133765	0.0198347	NW_020142588.1	502150	502172	+	intergenic:LOC112247214-Gap
169rev	GTTCATTTCAGGAGAAGAAGAGG	GTTCATTTCAGGACAGCAAATGG	.............*.**..*	4	0.00561598	0.0181803	NC_037117.1	34298139	34298161	+	intergenic:XM_024382434.1-XM_024382435.1
169rev	GTTCATTTCAGGAGAAGAAGAGG	GTTCATTTCAGCAGAGACAGCGG	...........*...***..	4	0.00871615	0.0180995	NW_020128822.1	200105	200127	+	intergenic:XM_024401692.1-XM_024401697.1/XM_024401696.1/XM_024401694.1/XM_024401698.1
169rev	GTTCATTTCAGGAGAAGAAGAGG	GTTGTTTTCAGGAGAAGACCGGG	...**.............**	4	0.207979	0.0161218	NC_037097.1	13671303	13671325	+	intron:XM_024396321.1/XM_024396270.1/XM_024396198.1/XM_024396119.1
169rev	GTTCATTTCAGGAGAAGAAGAGG	GTTCATTTCAGCAGCATAGGAGG	...........*..*.*.*.	4	0.0218266	0.0135361	NC_037122.1	27868113	27868135	+	intergenic:XM_024389463.1/XM_024389462.1-XM_024389465.1/XM_024389464.1
169rev	GTTCATTTCAGGAGAAGAAGAGG	TTTCATTTCAGGAGACAAACAGG	*..............**..*	4	0.046185	0	NC_037126.1	41848809	41848831	+	intergenic:XM_024394912.1/XM_024394911.1-XM_024394913.1
169rev	GTTCATTTCAGGAGAAGAAGAGG	GTACATTTTAGGAGACAAAGCGG	..*.....*......**...	4	0.0599672	0	NC_037112.1	5349166	5349188	-	intron:LOC112215333
169rev	GTTCATTTCAGGAGAAGAAGAGG	GTTCCTCTGAGGAGATGAAGAGG	....*.*.*......*....	4	0.102694	0	NC_037113.1	1860946	1860968	-	intergenic:XR_002948440.1-XM_024376717.1
169rev	GTTCATTTCAGGAGAAGAAGAGG	GTTTGTTTCAGGAGATGAAACGG	...**..........*...*	4	0.113563	0	NC_037097.1	13664641	13664663	+	intron:XM_024396321.1/XM_024396270.1/XM_024396198.1/XM_024396119.1
169rev	GTTCATTTCAGGAGAAGAAGAGG	GTACATTTTAGGAGACAAAGCGG	..*.....*......**...	4	0.0599672	0	NW_020128806.1	669510	669532	-	intron:LOC112232686
169rev	GTTCATTTCAGGAGAAGAAGAGG	GTTCATTTCAGAAAATGCAGAGG	...........*.*.*.*..	4	0.00337326	0	NC_037109.1	26701736	26701758	-	intergenic:XM_024441666.1/XM_024441665.1-LOC112264812
169rev	GTTCATTTCAGGAGAAGAAGAGG	GTTCATTTCAGGAGGTGAGCGGG	..............**..**	4	0.00790136	0	NC_037098.1	13965549	13965571	+	exon:XM_024444790.1/XM_024444781.1
169rev	GTTCATTTCAGGAGAAGAAGAGG	GTTTTTTTCAGGAGATGGAGAGG	...**..........*.*..	4	0.0506747	0	NC_037114.1	28036634	28036656	+	exon:XM_024378357.1
169rev	GTTCATTTCAGGAGAAGAAGAGG	GTTCATTACAGTAGATGCAGCGG	.......*...*...*.*..	4	0.0237304	0	NC_037124.1	22956635	22956657	-	intron:XM_024391660.1/XM_024391659.1/XM_024391658.1/XM_024391657.1/XM_024391656.1/XM_024391655.1/XM_024391654.1/XM_024391653.1/XM_024391652.1/XM_024391651.1
169rev	GTTCATTTCAGGAGAAGAAGAGG	CTTCATTACAGGAGCTGAAGTGG	*......*......**....	4	0.0729853	0	NC_037112.1	57547632	57547654	-	exon:XM_024375996.1/XM_024375993.1
169rev	GTTCATTTCAGGAGAAGAAGAGG	GGTCATTCCAGGAGATGAACCGG	.*.....*.......*...*	4	0.119961	0	NC_037103.1	21769070	21769092	-	intergenic:LOC112254017-XR_002954098.1
169rev	GTTCATTTCAGGAGAAGAAGAGG	GTTCATGTCAGGGGCTGAAGTGG	......*.....*.**....	4	0.0174321	0	NC_037116.1	44203195	44203217	+	intergenic:XM_024381139.1/XM_024381138.1/XM_024381136.1-XM_024381284.1
169rev	GTTCATTTCAGGAGAAGAAGAGG	GGTCATTTAAGGAGTTGAAGGGG	.*......*.....**....	4	0.0423361	0	NW_020129221.1	130009	130031	-	intergenic:XM_024405921.1-XM_024405922.1
169rev	GTTCATTTCAGGAGAAGAAGAGG	GTTCCTTTGAGTAGATGAAGAGG	....*...*..*...*....	4	0.0739759	0	NC_037121.1	10686985	10687007	-	intergenic:XR_002949401.1-XM_024387623.1/XM_024387622.1
169rev	GTTCATTTCAGGAGAAGAAGAGG	GATCATTTCAGGGGACGAACGGG	.*..........*..*...*	4	0.0464249	0	NC_037118.1	8971476	8971498	+	intron:XM_024383938.1
169rev	GTTCATTTCAGGAGAAGAAGAGG	GTTCATTTTTGGAGAAAAAGGGG	........**......*...	3	0.578956	0.720588	NW_020129627.1	8219	8241	+	intergenic:Gap-XM_024407184.1
169rev	GTTCATTTCAGGAGAAGAAGAGG	GCTTATTTTAGGAGAAGAAGAGG	.*.*....*...........	3	1.55408	0.6	NC_037112.1	19067764	19067786	-	intron:XM_024374727.1/XM_024374726.1/XM_024374725.1
169rev	GTTCATTTCAGGAGAAGAAGAGG	GTTCATTTTAGGAGGAAAAGAGG	........*.....*.*...	3	0.168469	0.530833	NC_037117.1	19377160	19377182	-	intergenic:XM_024383153.1/XM_024383145.1/XM_024383154.1/XM_024383151.1/XM_024383150.1/XM_024383149.1/XM_024383147.1/XM_024383148.1/XM_024383146.1/XM_024383152.1-XM_024383154.1/XM_024383153.1/XM_024383152.1/XM_024383151.1/XM_024383150.1/XM_024383149.1/XM_024383148.1/XM_024383147.1/XM_024383146.1/XM_024383145.1
169rev	GTTCATTTCAGGAGAAGAAGAGG	GATCACCTCAGGAGAAGAAGAGG	.*...**.............	3	1.00269	0.528846	NC_037112.1	68105429	68105451	+	exon:XM_024376396.1
169rev	GTTCATTTCAGGAGAAGAAGAGG	GTTCATATCAGAAGAAGAACAGG	......*....*.......*	3	0.416653	0.35	NW_020129238.1	250686	250708	+	intron:XM_024406007.1
169rev	GTTCATTTCAGGAGAAGAAGAGG	GTTTATTTCAGGAAAAGATGAGG	...*.........*....*.	3	0.147888	0.323077	NC_037099.1	68108576	68108598	-	intergenic:XM_024409474.1/XM_024409470.1/XM_024409462.1-XM_024409575.1
169rev	GTTCATTTCAGGAGAAGAAGAGG	ATTCATTTTAGGAGAAGGAGGGG	*.......*........*..	3	0.401299	0.315	NC_037103.1	58936762	58936784	+	intergenic:XM_024427360.1-rna18974
169rev	GTTCATTTCAGGAGAAGAAGAGG	GGTCATTTCATAAGAAGAAGAGG	.*........**........	3	0.768613	0.301538	NW_020129750.1	39986	40008	+	intergenic:XM_024407426.1-XR_002951712.1
169rev	GTTCATTTCAGGAGAAGAAGAGG	GTGCATTTCAGAAGAAGTAGAGG	..*........*.....*..	3	0.299595	0.233333	NC_037111.1	17198980	17199002	+	intergenic:XM_024373211.1/XM_024373213.1-XM_024373212.1
169rev	GTTCATTTCAGGAGAAGAAGAGG	GTGCATTTCAGAAGAAGTAGAGG	..*........*.....*..	3	0.299595	0.233333	NC_037116.1	42647139	42647161	+	intergenic:XM_024381102.1/XM_024381104.1-XM_024381103.1
169rev	GTTCATTTCAGGAGAAGAAGAGG	GTGGACTTCAGGAGAAGAAGGGG	..**.*..............	3	1.38389	0.227273	NC_037104.1	46198047	46198069	+	intergenic:XM_024429843.1-XM_024428590.1
169rev	GTTCATTTCAGGAGAAGAAGAGG	CTCCATTTCAGGAGGAGAAGGGG	*.*...........*.....	3	0.832622	0.19898	NC_037104.1	17916278	17916300	+	intergenic:XR_002954500.1-XM_024429149.1
169rev	GTTCATTTCAGGAGAAGAAGAGG	GTTGATGTCAGGGGAAGAAGAGG	...*..*.....*.......	3	0.706343	0.191816	NC_037102.1	24416957	24416979	-	intergenic:XM_024423549.1-XM_024423552.1/XM_024423551.1/XM_024423550.1
169rev	GTTCATTTCAGGAGAAGAAGAGG	GTTCGTTTCAGGAGGAGGAGAGG	....*.........*..*..	3	0.156187	0.1872	NW_020128858.1	1169554	1169576	+	intergenic:XM_024403307.1/XM_024403306.1/XM_024403305.1-XM_024403347.1
169rev	GTTCATTTCAGGAGAAGAAGAGG	GTTCGTTTCAGGAGGAGGAGAGG	....*.........*..*..	3	0.156187	0.1872	NW_020128858.1	1509867	1509889	-	intergenic:XM_024403348.1-XM_024403356.1/XM_024403355.1/XM_024403354.1
169rev	GTTCATTTCAGGAGAAGAAGAGG	TTTGTTTTCAGGAGAAGAAGAGG	*..**...............	3	2.42656	0.181818	NC_037108.1	66274154	66274176	+	intergenic:XM_024440220.1/XM_024440219.1-XM_024440221.1
169rev	GTTCATTTCAGGAGAAGAAGAGG	ATTCATTACAGGAGAAAAAGAAG	*......*........*...	3	0.258025	0.174222	NC_037104.1	49752598	49752620	-	intergenic:XM_024429919.1-XM_024430694.1/XM_024430693.1
169rev	GTTCATTTCAGGAGAAGAAGAGG	GTTCAGTACAGGAGAAGAGGAGG	.....*.*..........*.	3	0.566655	0.171429	NC_037100.1	35590248	35590270	-	intron:XM_024417907.1
169rev	GTTCATTTCAGGAGAAGAAGAGG	GTTCAGTACAGGAGAAGAGGAGG	.....*.*..........*.	3	0.566655	0.171429	NC_037100.1	38596297	38596319	-	intron:XM_024418010.1
169rev	GTTCATTTCAGGAGAAGAAGAGG	ATCCATTTCACGAGAAGAAGAGG	*.*.......*.........	3	1.54035	0.165306	NC_037120.1	19624597	19624619	+	exon:XM_024386987.1
169rev	GTTCATTTCAGGAGAAGAAGAGG	ATTCATTTCAGGAGAGAAAGAGG	*..............**...	3	0.221901	0.161538	NC_037103.1	52392727	52392749	+	intergenic:XM_024427139.1/XM_024427138.1-XM_024427140.1
169rev	GTTCATTTCAGGAGAAGAAGAGG	ATTCACTTCAGGAGAGGAAGAGG	*....*.........*....	3	0.327884	0.157343	NW_020129037.1	307064	307086	-	intron:XM_024405071.1
169rev	GTTCATTTCAGGAGAAGAAGAGG	GTTCATTTCAGCAGGAGAGGGGG	...........*..*...*.	3	0.105644	0.129044	NC_037102.1	7582927	7582949	+	intergenic:XR_002953803.1-XM_024425266.1
169rev	GTTCATTTCAGGAGAAGAAGAGG	GTTAATTTCAGGAGAAGGGGGGG	...*.............**.	3	0.194537	0.126316	NC_037098.1	5256046	5256068	-	intron:XM_024441412.1
169rev	GTTCATTTCAGGAGAAGAAGAGG	GTTAATTTCAGGAGAAGGGGGGG	...*.............**.	3	0.194537	0.126316	NW_020142512.1	4323181	4323203	-	intron:XM_024413696.1
169rev	GTTCATTTCAGGAGAAGAAGAGG	GTTTATGGCAGGAGAAGAAGGAG	...*..**............	3	0.331469	0.0894699	NW_020128823.1	1443009	1443031	+	intergenic:XM_024401753.1-Gap
169rev	GTTCATTTCAGGAGAAGAAGAGG	GTCTATTTCAGAAGAAGAAGTAG	..**.......*........	3	0.259272	0.082963	NC_037111.1	8902665	8902687	-	intergenic:XR_002948101.1-XM_024374047.1
169rev	GTTCATTTCAGGAGAAGAAGAGG	GTTGTTTTCAGAAGAAGAAGAAG	...**......*........	3	0.262954	0.0439955	NC_037112.1	51907429	51907451	-	intergenic:XM_024375814.1-XM_024375813.1/XM_024375812.1/XM_024375811.1/XM_024375810.1/XM_024375809.1
169rev	GTTCATTTCAGGAGAAGAAGAGG	GTTGTTTTCAGAAGAAGAAGAAG	...**......*........	3	0.262954	0.0439955	NW_020128805.1	1398518	1398540	+	intergenic:XM_024399598.1/XM_024399597.1/XM_024399596.1/XM_024399595.1/XM_024399593.1-XM_024399599.1
169rev	GTTCATTTCAGGAGAAGAAGAGG	GTTCATTACAGGATAGGAAGGGG	.......*.....*.*....	3	0.0684855	0.0410256	NC_037108.1	57873844	57873866	+	exon:XM_024439958.1
169rev	GTTCATTTCAGGAGAAGAAGAGG	TTTCTTTTCATGAGAAGAAGAAG	*...*.....*.........	3	0.312444	0.03626	NC_037108.1	50868502	50868524	-	intergenic:XM_024439712.1-XM_024440733.1
169rev	GTTCATTTCAGGAGAAGAAGAGG	TTTCATATCGGGAGAAGAAGGGA	*.....*..*..........	3	0.336197	0.0337577	NW_020129266.1	45287	45309	-	intron:LOC112237523
169rev	GTTCATTTCAGGAGAAGAAGAGG	TCTCTTTTCAGGAGAAGAAGAGA	**..*...............	3	0.485313	0.021645	NC_037126.1	13105260	13105282	-	intergenic:XM_024393741.1/XM_024393740.1-XM_024393746.1/XM_024393745.1/XM_024393742.1
169rev	GTTCATTTCAGGAGAAGAAGAGG	TCTCTTTTCAGGAGAAGAAGAGA	**..*...............	3	0.485313	0.021645	NC_037129.1	10149935	10149957	-	intron:XM_024397231.1
169rev	GTTCATTTCAGGAGAAGAAGAGG	TCTCTTTTCAGGAGAAGAAGAGA	**..*...............	3	0.485313	0.021645	NC_037103.1	50212884	50212906	+	intergenic:XM_024427029.1-XR_002954257.1
169rev	GTTCATTTCAGGAGAAGAAGAGG	GTTCACTCCCGGAGAAGAAGAGA	.....*.*.*..........	3	0.270419	0.0210438	NW_020130127.1	33755	33777	-	intergenic:LOC112239659-Gap
169rev	GTTCATTTCAGGAGAAGAAGAGG	GTTCCTATGAGGAGAAGAAGGGA	....*.*.*...........	3	0.202527	0.0188079	NW_020129135.1	314922	314944	+	intergenic:XM_024405614.1/XM_024405613.1-Gap
169rev	GTTCATTTCAGGAGAAGAAGAGG	GTACATTTGGGGAGAAGAAGGGA	..*.....**..........	3	0.282254	0.0170593	NC_037106.1	51351495	51351517	-	intergenic:XM_024435999.1-XM_024436031.1/XM_024436032.1
169rev	GTTCATTTCAGGAGAAGAAGAGG	GCTCATTTCAGGAGAACAAGCAG	.*..............*...	2	1.045	0.0522876	NC_037099.1	11956420	11956442	+	intron:XM_024393590.1/XM_024393580.1/XM_024393571.1/XM_024393562.1/XM_024393555.1/XM_024393547.1/XM_024393536.1/XM_024393528.1/XM_024393520.1
169rev	GTTCATTTCAGGAGAAGAAGAGG	GCTCATTTCAGGAGAACAAGCAG	.*..............*...	2	1.045	0.0522876	NC_037119.1	7167595	7167617	+	intron:XM_024385600.1/XM_024385599.1/XM_024385598.1/XM_024385596.1/XM_024385595.1
169rev	GTTCATTTCAGGAGAAGAAGAGG	GTGCATTTCAGGAGAGGAAGGAG	..*............*....	2	0.37468	0.0249288	NC_037100.1	61533304	61533326	-	exon:XM_024418780.1/XM_024418779.1
169rev	GTTCATTTCAGGAGAAGAAGAGG	GTGCATTTCAGGAGAGGAAGGAG	..*............*....	2	0.37468	0.0249288	NC_037108.1	59573888	59573910	-	exon:XM_024439992.1
180rev	GAACACCAAAGGTTCATTTCAGG	AAACACTAAAAGCTCATTTCAGG	*.....*...*.*.......	4	0.220511	0.577303	NC_037098.1	31951109	31951131	+	intergenic:XM_024377498.1-XM_024438638.1
180rev	GAACACCAAAGGTTCATTTCAGG	AAAAACAAAAAGTTCATTTCAGG	*..*..*...*.........	4	0.542337	0.568421	NC_037108.1	70580531	70580553	+	intron:XM_024440392.1/XM_024440391.1/XM_024440390.1/XM_024440389.1
180rev	GAACACCAAAGGTTCATTTCAGG	AAATACCAAAAGATCATTTCTGG	*..*......*.*.......	4	0.322857	0.498462	NW_020130084.1	43867	43889	+	intergenic:Gap-XM_024408027.1
180rev	GAACACCAAAGGTTCATTTCAGG	AAACACCAAAAATCCATTTCAGG	*.........**.*......	4	0.0611577	0.24	NW_020142510.1	8235820	8235842	+	intron:XM_024413423.1
180rev	GAACACCAAAGGTTCATTTCAGG	AAACACCAAAAATCCATTTCAGG	*.........**.*......	4	0.0611577	0.24	NC_037101.1	37057472	37057494	+	intron:XM_024420654.1
180rev	GAACACCAAAGGTTCATTTCAGG	GTACAACAACAGTTCATTTCAGG	.*...*...**.........	4	0.442449	0.225108	NC_037130.1	14937699	14937721	-	intergenic:XM_024398836.1-XM_024398840.1/XM_024398839.1/XM_024398838.1
180rev	GAACACCAAAGGTTCATTTCAGG	GAATGCCAAAGCTTCACTTCTGG	...**......*....*...	4	0.284729	0.215253	NC_037102.1	70049121	70049143	+	intergenic:XM_024425051.1-XM_024425057.1/XM_024425055.1/XM_024425054.1/XM_024425053.1
180rev	GAACACCAAAGGTTCATTTCAGG	AAACACCAAAAGATCATTTTTGG	*.........*.*......*	4	0.149801	0.186923	NC_037116.1	34098064	34098086	-	intron:XM_024380694.1/XM_024380692.1/XM_024380691.1/XM_024380690.1
180rev	GAACACCAAAGGTTCATTTCAGG	GGAGACAAAAGCTTCATTTCTGG	.*.*..*....*........	4	0.480774	0.158824	NC_037101.1	60007711	60007733	-	intergenic:XM_024421491.1-XM_024422744.1
180rev	GAACACCAAAGGTTCATTTCAGG	GTGCACCAAAGGTTCAAATCGGG	.**.............**..	4	0.117806	0.158025	NC_037098.1	43361067	43361089	+	intergenic:XM_024381087.1/XM_024381080.1/XM_024381070.1/XM_024381060.1-XM_024381097.1
180rev	GAACACCAAAGGTTCATTTCAGG	CAACACCAAAGGTACAAATCGGG	*............*..**..	4	0.0178023	0.157218	NC_037129.1	1324983	1325005	+	intron:XM_024397022.1/XM_024397021.1
180rev	GAACACCAAAGGTTCATTTCAGG	GAACACCAATGATACATTTTAGG	.........*.*.*.....*	4	0.0402812	0.152941	NC_037111.1	24484332	24484354	+	intron:XM_024373513.1
180rev	GAACACCAAAGGTTCATTTCAGG	GAAAGCCCCAGGTTCATTTCGGG	...**..**...........	4	0.797321	0.148485	NC_037115.1	934177	934199	-	intron:XM_024378753.1/XM_024378752.1
180rev	GAACACCAAAGGTTCATTTCAGG	GGACACCTCAGGATCATTTCTGG	.*.....**...*.......	4	0.338304	0.135636	NC_037100.1	38225472	38225494	-	intergenic:XM_024417994.1/XM_024417993.1-XM_024417995.1
180rev	GAACACCAAAGGTTCATTTCAGG	GGACACCTCAGGATCATTTCTGG	.*.....**...*.......	4	0.338304	0.135636	NC_037100.1	35219423	35219445	-	intergenic:XM_024417890.1/XM_024417889.1-XM_024417891.1
180rev	GAACACCAAAGGTTCATTTCAGG	GAAGACAAACAGTTCATTTCAGG	...*..*..**.........	4	0.476527	0.125	NC_037108.1	75668881	75668903	+	intergenic:XM_024440505.1-XM_024440803.1
180rev	GAACACCAAAGGTTCATTTCAGG	GAGCACAAAACGTACATTTCTGG	..*...*...*..*......	4	0.0796769	0.121599	NC_037102.1	45707314	45707336	-	intergenic:XM_024424153.1/XM_024424152.1/XM_024424151.1/XM_024424148.1-XM_024424152.1/XM_024424148.1
180rev	GAACACCAAAGGTTCATTTCAGG	GAAAACAACAGGTTCATTACTGG	...*..*.*.........*.	4	0.208135	0.103115	NC_037127.1	13193338	13193360	+	intergenic:XM_024395091.1-LOC112229233
180rev	GAACACCAAAGGTTCATTTCAGG	GAACACTATATCTTCATTTCTGG	......*.*.**........	4	0.1487	0.0992647	NC_037124.1	8345136	8345158	+	intergenic:LOC112227332-LOC112227333
180rev	GAACACCAAAGGTTCATTTCAGG	GAACACTATATCTTCATTTCTGG	......*.*.**........	4	0.1487	0.0992647	NC_037124.1	7183134	7183156	+	intergenic:LOC112227321-LOC112227322
180rev	GAACACCAAAGGTTCATTTCAGG	GAACATCACAGGTACATTACAGG	.....*..*....*....*.	4	0.0260795	0.0938498	NW_020129115.1	53543	53565	+	intergenic:Gap-XM_024405443.1
180rev	GAACACCAAAGGTTCATTTCAGG	GAACAGTAGAGGTTCATGTCAGG	.....**.*........*..	4	0.0743841	0.0902778	NW_020128887.1	181439	181461	+	intergenic:XM_024403837.1/XM_024403838.1-XM_024403840.1/XM_024403839.1
180rev	GAACACCAAAGGTTCATTTCAGG	GCACACCCATGGTCCATTTCTGG	.*.....*.*...*......	4	0.206278	0.0848911	NC_037106.1	29118409	29118431	+	intergenic:XR_002955096.1/XR_002955095.1-LOC112259578
180rev	GAACACCAAAGGTTCATTTCAGG	GAACACCAAAGACCCATGTCTGG	...........***...*..	4	0.00758984	0.0701754	NW_020134133.1	3304	3326	-	intron:XR_002952528.1
180rev	GAACACCAAAGGTTCATTTCAGG	GAACACCACAAGTTAAATTCAGG	........*.*...*.*...	4	0.0477578	0.0677249	NC_037120.1	14058230	14058252	-	intergenic:XM_024386710.1/XM_024386711.1-XM_024386713.1/XM_024386712.1
180rev	GAACACCAAAGGTTCATTTCAGG	GGAAACCAACGGTTCATTTTTGG	.*.*.....*.........*	4	0.642349	0.0673684	NC_037110.1	24162557	24162579	-	intergenic:XM_024444571.1-LOC112266781
180rev	GAACACCAAAGGTTCATTTCAGG	GAACAGCAGAGGTTCACTACTGG	.....*..*.......*.*.	4	0.0673867	0.0672269	NC_037104.1	57441778	57441800	-	intergenic:XM_024430271.1/XM_024430270.1-XM_024430272.1
180rev	GAACACCAAAGGTTCATTTCAGG	GAAAAGCAAAGCTTCATTTTTGG	...*.*.....*.......*	4	0.19653	0.0668731	NC_037110.1	45329678	45329700	+	intron:XM_024445460.1
180rev	GAACACCAAAGGTTCATTTCAGG	GAATTCCCAAGGTTCATTTATGG	...**..*...........*	4	0.66025	0.0623377	NC_037105.1	29950715	29950737	-	intergenic:XM_024431724.1/XM_024431719.1/XM_024431718.1/XM_024431722.1/XM_024431721.1/XM_024431720.1/XM_024431716.1-XM_024431726.1/XM_024431725.1
180rev	GAACACCAAAGGTTCATTTCAGG	GAACCCCAAAGGCACATTGCTGG	....*.......**....*.	4	0.0273032	0.0610902	NC_037108.1	26361654	26361676	+	exon:XM_024438869.1/XM_024438868.1
180rev	GAACACCAAAGGTTCATTTCAGG	GAATACCAAAGTGTCACTTCTGG	...*.......**...*...	4	0.11019	0.0566595	NC_037115.1	53431185	53431207	+	intergenic:LOC112218949-XM_024380192.1
180rev	GAACACCAAAGGTTCATTTCAGG	GAACCCAACAGGGTCATTTCAGG	....*.*.*...*.......	4	0.220438	0.0559006	NC_037104.1	52309360	52309382	+	intergenic:XM_024430049.1-XM_024428603.1
180rev	GAACACCAAAGGTTCATTTCAGG	GAACCCCAAAGGATCAATACTGG	....*.......*...*.*.	4	0.0705487	0.0527473	NC_037122.1	39823180	39823202	-	intergenic:LOC112225697-XM_024389767.1
180rev	GAACACCAAAGGTTCATTTCAGG	GAAAACCATAGGTTCATGACGGG	...*....*........**.	4	0.0597283	0.0481203	NC_037102.1	30772261	30772283	-	intergenic:XM_024425349.1-XM_024423781.1
180rev	GAACACCAAAGGTTCATTTCAGG	GAAAACCATAGGTTCATGACGGG	...*....*........**.	4	0.0597283	0.0481203	NW_020142510.1	7189800	7189822	+	intergenic:XM_024413136.1-XM_024413236.1
180rev	GAACACCAAAGGTTCATTTCAGG	AAACACAAAAGGTTAATTTTAGG	*.....*.......*....*	4	0.127664	0.045	NW_020128999.1	140540	140562	+	intron:XM_024404818.1
180rev	GAACACCAAAGGTTCATTTCAGG	GAACACCAATGGTCCATCTTGGG	.........*...*...*.*	4	0.016047	0.032413	NC_037104.1	23597235	23597257	+	intergenic:XM_024429400.1/XM_024429399.1/XM_024429398.1/XM_024429397.1/XM_024429396.1/XM_024429395.1/XM_024429394.1-XM_024429402.1/XM_024429403.1
180rev	GAACACCAAAGGTTCATTTCAGG	GACCTCCAAGGGTTCATTACTGG	..*.*....*........*.	4	0.452918	0.0247372	NC_037116.1	3598629	3598651	+	intergenic:XM_024381498.1/XM_024381497.1/XM_024381501.1-XM_024381502.1
180rev	GAACACCAAAGGTTCATTTCAGG	GAACAGCACAGTTTAATTTCTGG	.....*..*..*..*.....	4	0.0697352	0.02442	NC_037109.1	20271718	20271740	-	intergenic:XM_024443434.1-XM_024441387.1/XM_024441386.1/XM_024441388.1
180rev	GAACACCAAAGGTTCATTTCAGG	GACCACCAAAGGTTCAAGACAGG	..*.............***.	4	0.0371088	0.0217687	NC_037109.1	4374631	4374653	+	intron:XM_024440863.1
180rev	GAACACCAAAGGTTCATTTCAGG	GAAAACAAAACGTTTATTTCGGG	...*..*...*...*.....	4	0.145346	0.0180451	NC_037115.1	10340367	10340389	-	intron:XM_024379028.1
180rev	GAACACCAAAGGTTCATTTCAGG	GAAAACAAAACGTTTATTTCAGG	...*..*...*...*.....	4	0.145346	0.0180451	NC_037108.1	5073713	5073735	+	intergenic:XM_024438172.1/XM_024438171.1-LOC112263905
180rev	GAACACCAAAGGTTCATTTCAGG	GAACACGCCAGGTTCAGTTCTGG	......***.......*...	4	0.229868	0.0135584	NW_020128980.1	27849	27871	+	intron:XM_024404699.1
180rev	GAACACCAAAGGTTCATTTCAGG	CAACACAAAAGGTTCATTAGAGG	*.....*...........**	4	0.150052	0.0090036	NC_037098.1	50731871	50731893	+	intergenic:XM_024383444.1/XM_024383437.1-XM_024438303.1
180rev	GAACACCAAAGGTTCATTTCAGG	CAAGACCAAAGGTTGATTTACGG	*..*..........*....*	4	0.186916	0.00892857	NW_020142509.1	364784	364806	+	intergenic:XM_024413065.1/XM_024413064.1/XM_024413063.1/XM_024413061.1/XM_024413060.1/XM_024413059.1/XM_024413058.1/XM_024413057.1/XM_024413056.1/XM_024413055.1/XM_024413054.1/XM_024413053.1-XM_024413066.1
180rev	GAACACCAAAGGTTCATTTCAGG	CAAGACCAAAGGTTGATTTACGG	*..*..........*....*	4	0.186916	0.00892857	NW_020128814.1	1281652	1281674	-	intergenic:XM_024400991.1-XM_024400990.1/XM_024400989.1/XM_024400988.1/XM_024400987.1/XM_024400986.1/XM_024400985.1/XM_024400984.1/XM_024400983.1/XM_024400982.1/XM_024400981.1/XM_024400980.1/XM_024400979.1
180rev	GAACACCAAAGGTTCATTTCAGG	TAACACCTAAGGTTTATTGCTGG	*......*......*...*.	4	0.141195	0.00714286	NC_037097.1	72518627	72518649	-	intron:XM_024429800.1
180rev	GAACACCAAAGGTTCATTTCAGG	GAACACCACAGGTTAGTTCCTGG	........*.....**..*.	4	0.0126932	0.00673656	NW_020129324.1	32551	32573	+	intron:LOC112237739
180rev	GAACACCAAAGGTTCATTTCAGG	GAACACCACAGGATGATTTTGGG	........*...*.*....*	4	0.0378076	0.00593407	NC_037104.1	60429641	60429663	+	intergenic:XM_024430333.1-XM_024430335.1/XM_024430334.1
180rev	GAACACCAAAGGTTCATTTCAGG	GGACACCAAATGGTTATTTCTGG	.*........*.*.*.....	4	0.0865257	0.00535117	NC_037104.1	4438517	4438539	-	intergenic:XM_024428728.1-LOC112257005
180rev	GAACACCAAAGGTTCATTTCAGG	GGACACCAAATGGTTATTTCTGG	.*........*.*.*.....	4	0.0865257	0.00535117	NC_037117.1	32634975	32634997	-	intergenic:XM_024383421.1/XM_024383420.1/XM_024383419.1/XM_024383418.1-XM_024382512.1
180rev	GAACACCAAAGGTTCATTTCAGG	GAACACCTGAGGTTCATTGGTGG	.......**.........**	4	0.120641	0.00420168	NW_020130121.1	11042	11064	-	intron:XM_024408090.1
180rev	GAACACCAAAGGTTCATTTCAGG	GGACACAAAAGGTTTATTTGTGG	.*....*.......*....*	4	0.127664	0.00235294	NC_037104.1	11526896	11526918	+	intron:XM_024430614.1
180rev	GAACACCAAAGGTTCATTTCAGG	TAACAGCAAAGGTTTATTTGAGG	*....*........*....*	4	0.113084	0.00196078	NC_037120.1	3573166	3573188	-	intergenic:XM_024386366.1-XM_024386255.1
180rev	GAACACCAAAGGTTCATTTCAGG	GAACCCCAAAGGCTGATTTGTGG	....*.......*.*....*	4	0.0684785	0.00116099	NW_020142609.1	1092535	1092557	+	intergenic:XM_024416152.1-Gap
180rev	GAACACCAAAGGTTCATTTCAGG	GAACACCAAAAGGTTATTTGAGG	..........*.*.*....*	4	0.0343424	0.00102302	NC_037097.1	76902222	76902244	+	exon:XM_024430874.1/XM_024430896.1/XM_024430905.1/XM_024430919.1/XM_024430913.1/XM_024430891.1/XM_024430928.1/XM_024430883.1
180rev	GAACACCAAAGGTTCATTTCAGG	GAACACAAAACGTTGATTTGGGG	......*...*...*....*	4	0.0636782	0.000945378	NW_020130367.1	55367	55389	+	intergenic:XR_002951970.1-Gap
180rev	GAACACCAAAGGTTCATTTCAGG	GAACACCAAATGTTTTTTTATGG	..........*...**...*	4	0.0152633	0	NC_037129.1	35426004	35426026	+	intron:XM_024396957.1
180rev	GAACACCAAAGGTTCATTTCAGG	GAACACCAATGGTGGGTTTCTGG	.........*...***....	4	0.00863423	0	NC_037108.1	3886170	3886192	-	intron:XM_024440583.1
180rev	GAACACCAAAGGTTCATTTCAGG	GGACACCAAAGGTTGTTCTCAGG	.*............**.*..	4	0.0143051	0	NC_037101.1	51530286	51530308	-	intergenic:XM_024422523.1-XM_024421063.1
180rev	GAACACCAAAGGTTCATTTCAGG	GAAACCCAGAGGTGCATTTCAGG	...**...*....*......	4	0.130252	0	NC_037109.1	20699459	20699481	-	intergenic:XM_024441396.1/XM_024441395.1/XM_024441394.1-XM_024441403.1
180rev	GAACACCAAAGGTTCATTTCAGG	GAACACATAAGGTGCAATTCTGG	......**.....*..*...	4	0.0560561	0	NC_037105.1	54089421	54089443	-	intergenic:XR_002954698.1/XM_024432360.1-XM_024432351.1/XM_024432350.1
180rev	GAACACCAAAGGTTCATTTCAGG	GAACACATAAGGTGCAATTCTGG	......**.....*..*...	4	0.0560561	0	NC_037105.1	41863188	41863210	-	intergenic:XR_002954674.1/XM_024432093.1-XM_024432083.1/XM_024432082.1
180rev	GAACACCAAAGGTTCATTTCAGG	GAACCCCAAAGGTTCTCCTCTGG	....*..........***..	4	0.0195098	0	NC_037109.1	16290698	16290720	+	intergenic:XM_024441298.1-LOC112264590
180rev	GAACACCAAAGGTTCATTTCAGG	AAACCCCAAAGGTTCCTTACTGG	*...*..........*..*.	4	0.090618	0	NW_020128996.1	200349	200371	+	intergenic:XM_024404813.1-Gap
180rev	GAACACCAAAGGTTCATTTCAGG	GAACCCCAAACGTTGTTTTCAGG	....*.....*...**....	4	0.0366026	0	NC_037126.1	26745466	26745488	+	exon:XM_024394198.1/XM_024394197.1
180rev	GAACACCAAAGGTTCATTTCAGG	CAACATCAAACGTTCCTTTCAGG	*....*....*....*....	4	0.0914427	0	NW_020128939.1	116212	116234	-	intergenic:XM_024404349.1-LOC112235823
180rev	GAACACCAAAGGTTCATTTCAGG	GTAGACCAATGGTGCATTTCTGG	.*.*.....*...*......	4	0.206278	0	NC_037115.1	14174430	14174452	+	intergenic:XM_024379106.1-XM_024379108.1/XM_024379107.1
180rev	GAACACCAAAGGTTCATTTCAGG	GACCACTAAAGGTTCCTTTATGG	..*...*........*...*	4	0.0764776	0	NC_037117.1	12897015	12897037	-	intergenic:XR_002948886.1-XM_024382939.1/XM_024382938.1/XM_024382937.1
180rev	GAACACCAAAGGTTCATTTCAGG	CAACATCAAACGTTCCTTTCAGG	*....*....*....*....	4	0.0914427	0	NW_020130069.1	158681	158703	-	intergenic:XR_002951865.1-Gap
180rev	GAACACCAAAGGTTCATTTCAGG	GAAAACCAAATGTTTTTTTCTGG	...*......*...**....	4	0.0384559	0	NC_037099.1	59914261	59914283	-	intron:XM_024407514.1/XM_024407510.1/XM_024407506.1
180rev	GAACACCAAAGGTTCATTTCAGG	TAACAACAAAGGAGCATTTCGGG	*....*......**......	4	0.0524396	0	NC_037122.1	13658202	13658224	-	intron:LOC112225197
180rev	GAACACCAAAGGTTCATTTCAGG	GGATACCAAAGGTTTTTTTCTGG	.*.*..........**....	4	0.0692899	0	NC_037115.1	21768225	21768247	-	intergenic:XM_024380412.1-XM_024379258.1
180rev	GAACACCAAAGGTTCATTTCAGG	GAATACCAAATGTTCTCTTCAGG	...*......*....**...	4	0.0552445	0	NC_037102.1	20781024	20781046	-	intron:XM_024423437.1
180rev	GAACACCAAAGGTTCATTTCAGG	GAACACCAAATGTTCTTATTTGG	..........*....*.*.*	4	0.0111627	0	NC_037108.1	30842580	30842602	+	intergenic:XM_024439074.1/XM_024439075.1-XM_024439097.1
180rev	GAACACCAAAGGTTCATTTCAGG	AAACACCAAACGTTCCTTTAAGG	*.........*....*...*	4	0.0665783	0	NC_037104.1	25376439	25376461	+	intergenic:XM_024429462.1/XM_024429461.1-XM_024429464.1/XM_024429463.1
180rev	GAACACCAAAGGTTCATTTCAGG	GAACACAGAAGGTTCATCTCTGG	......**.........*..	3	0.376814	0.235714	NC_037103.1	76649601	76649623	-	exon:XM_024428347.1
180rev	GAACACCAAAGGTTCATTTCAGG	GAACACAGAAGGTTCATCTCTGG	......**.........*..	3	0.376814	0.235714	NW_020129494.1	452604	452626	+	exon:XM_024406839.1
180rev	GAACACCAAAGGTTCATTTCAGG	GAACATCAAAGTTACATTTCTGG	.....*.....*.*......	3	0.11852	0.221088	NC_037112.1	8751093	8751115	+	intergenic:XM_024376521.1-XM_024374386.1/XM_024374385.1
180rev	GAACACCAAAGGTTCATTTCAGG	GAACATCAAAGTTACATTTCTGG	.....*.....*.*......	3	0.11852	0.221088	NC_037105.1	86117933	86117955	-	intergenic:XM_024433578.1/XM_024433577.1-XR_002954847.1
180rev	GAACACCAAAGGTTCATTTCAGG	AAACACCAAATGTACATTTCTGG	*.........*..*......	3	0.245885	0.214286	NC_037100.1	18246268	18246290	+	intron:LOC112248284
180rev	GAACACCAAAGGTTCATTTCAGG	AAACACCAAATGTACATTTCTGG	*.........*..*......	3	0.245885	0.214286	NC_037100.1	13910510	13910532	+	intron:LOC112248190
180rev	GAACACCAAAGGTTCATTTCAGG	GATCGCCAAAGGCTCATTTCTAG	..*.*.......*.......	3	0.214817	0.104025	NW_020142686.1	45311	45333	+	intergenic:Gap-XM_024416600.1
180rev	GAACACCAAAGGTTCATTTCAGG	GTACACCAACGGTTCGTTTCAGG	.*.......*.....*....	3	0.499142	0.04662	NC_037106.1	5415201	5415223	-	intron:LOC112259856
180rev	GAACACCAAAGGTTCATTTCAGG	GAACACCTATGGTTTATTTCTGG	.......*.*....*.....	3	0.627809	0.0252101	NW_020142533.1	348335	348357	-	intergenic:XM_024414603.1/XM_024414602.1-XM_024414603.1
180rev	GAACACCAAAGGTTCATTTCAGG	GAACACCTATGGTTTATTTCTGG	.......*.*....*.....	3	0.627809	0.0252101	NC_037107.1	32846330	32846352	-	intron:XR_002955244.1
180rev	GAACACCAAAGGTTCATTTCAGG	GACCACAAAAGGTTGATTTCAGG	..*...*.......*.....	3	0.536643	0.0160714	NC_037119.1	14112896	14112918	+	exon:XM_024385957.1
180rev	GAACACCAAAGGTTCATTTCAGG	GAACGCCCCAGGTTCATTTCGGA	....*..**...........	3	0.296526	0.0122449	NC_037097.1	88505566	88505588	-	intergenic:XR_002954196.1-XM_024434245.1
180rev	GAACACCAAAGGTTCATTTCAGG	GAACTCCAAACGTGCATTTCTGG	....*.....*..*......	3	0.220985	0	NC_037097.1	18684510	18684532	-	intron:XM_024411428.1
180rev	GAACACCAAAGGTTCATTTCAGG	GAACATCAAAGGTTCATTTTGAG	.....*.............*	2	0.61454	0.0722222	NC_037100.1	42647458	42647480	+	intergenic:XR_002953400.1/XR_002953399.1-XM_024418146.1
180rev	GAACACCAAAGGTTCATTTCAGG	GAACACAAAAGGTTGATTTCAGG	......*.......*.....	2	1.38009	0.0375	NC_037099.1	17148241	17148263	+	exon:XM_024386811.1
180rev	GAACACCAAAGGTTCATTTCAGG	GAACACCAAACGTTCTTTTCTGG	..........*....*....	2	0.60458	0	NW_020132144.1	8688	8710	+	intergenic:XM_024409922.1-Gap
191rev	TCTGGAACGCGGAACACCAAAGG	TGTGCAAAGAGGAACACCAAGGG	.*..*..*.*..........	4	1.25711	0.307909	NW_020142518.1	15475	15497	+	intron:XM_024414215.1
191rev	TCTGGAACGCGGAACACCAAAGG	TTGGGAAGGTGGAACACCAAGGG	.**....*.*..........	4	1.23951	0.275019	NW_020128989.1	237976	237998	+	intergenic:XM_024404752.1/XM_024404751.1/XM_024404754.1-Gap
191rev	TCTGGAACGCGGAACACCAAAGG	CCTGGAACCTGCAACACCAAGGG	*.......**.*........	4	0.396115	0.229971	NC_037104.1	72734161	72734183	+	intergenic:XR_002954539.1/XR_002954538.1-XM_024430745.1
191rev	TCTGGAACGCGGAACACCAAAGG	TGCGGAACACAGAACACCAAAGG	.**.....*.*.........	4	0.478373	0.191659	NC_037106.1	60351342	60351364	-	intergenic:XM_024436322.1-XR_002955081.1
191rev	TCTGGAACGCGGAACACCAAAGG	TGGGAAACGCGGAACACCTATGG	.**.*.............*.	4	0.491768	0.162319	NW_020142532.1	1121361	1121383	-	intron:XM_024414577.1/XM_024414576.1
191rev	TCTGGAACGCGGAACACCAAAGG	TGGGAAACGCGGAACACCTATGG	.**.*.............*.	4	0.491768	0.162319	NC_037103.1	81434716	81434738	+	intron:XM_024428123.1/XM_024428122.1
191rev	TCTGGAACGCGGAACACCAAAGG	TCTGGAGCGCTGAACACCTGAGG	......*...*.......**	4	0.0748457	0.111791	NC_037099.1	12831440	12831462	+	intergenic:XM_024393911.1-XM_024393919.1/XM_024393911.1
191rev	TCTGGAACGCGGAACACCAAAGG	TCTGAATCCCGCAACACCAAGGG	....*.*.*..*........	4	0.280247	0.108088	NC_037109.1	13551708	13551730	+	intergenic:XM_024441163.1-XM_024441166.1/XM_024441165.1
191rev	TCTGGAACGCGGAACACCAAAGG	TGTGGAAAGGGGAACACAAAAGG	.*.....*.*.......*..	4	0.285817	0.094686	NC_037099.1	61147566	61147588	+	intergenic:XM_024407764.1/XM_024407761.1/XM_024407753.1-XM_024414006.1
191rev	TCTGGAACGCGGAACACCAAAGG	TCTGTAACAAGGAACATCAATGG	....*...**......*...	4	0.325663	0.078	NW_020129574.1	105631	105653	-	intergenic:XM_024407053.1-Gap
191rev	TCTGGAACGCGGAACACCAAAGG	TCTGGAACGTTAAACACCACAGG	.........***.......*	4	0.150041	0.076786	NC_037098.1	52792240	52792262	-	exon:XM_024439163.1
191rev	TCTGGAACGCGGAACACCAAAGG	TCACTAACGCGGAACACTAATGG	..***............*..	4	0.305989	0.0729292	NW_020128862.1	706162	706184	+	intron:LOC112235098
191rev	TCTGGAACGCGGAACACCAAAGG	TCTGAATCCCGGTACACCAAGGG	....*.*.*...*.......	4	0.220438	0.06125	NC_037099.1	12195570	12195592	+	intergenic:rna5802-XM_024393684.1
191rev	TCTGGAACGCGGAACACCAAAGG	TCTGAATCCCGGTACACCAAGGG	....*.*.*...*.......	4	0.220438	0.06125	NC_037129.1	3804859	3804881	-	intergenic:XM_024397064.1-XM_024398236.1
191rev	TCTGGAACGCGGAACACCAAAGG	TCTGAATCCCGGTACACCAAGGG	....*.*.*...*.......	4	0.220438	0.06125	NC_037103.1	3818440	3818462	-	exon:XR_002954061.1
191rev	TCTGGAACGCGGAACACCAAAGG	TCTGAATCCCGGTACACCAAGGG	....*.*.*...*.......	4	0.220438	0.06125	NW_020128804.1	2876154	2876176	-	intergenic:XM_024399123.1/XM_024399122.1/XM_024399121.1/XM_024399120.1/XM_024399119.1/XM_024399118.1/XM_024399117.1/XM_024399116.1/XM_024399115.1/XM_024399114.1-XM_024399125.1
191rev	TCTGGAACGCGGAACACCAAAGG	TCTGAATCCCGGTACACCAAGGG	....*.*.*...*.......	4	0.220438	0.06125	NC_037108.1	54644557	54644579	+	intergenic:XM_024439845.1-XM_024439856.1/XM_024439855.1/XM_024439854.1/XM_024439853.1/XM_024439852.1/XM_024439851.1/XM_024439850.1/XM_024439848.1/XM_024439847.1/XM_024439846.1
191rev	TCTGGAACGCGGAACACCAAAGG	GCTGGAGAGCGGAACACGAAGGG	*.....**.........*..	4	0.211958	0.0585166	NW_020129707.1	24696	24718	-	intergenic:XR_002951693.1/XR_002951692.1-XM_024407316.1/XM_024407315.1/XM_024407314.1/XM_024407313.1
191rev	TCTGGAACGCGGAACACCAAAGG	GCTGGAGAGCGGAACACGAAGGG	*.....**.........*..	4	0.211958	0.0585166	NW_020129707.1	24633	24655	-	intergenic:XR_002951693.1/XR_002951692.1-XM_024407316.1/XM_024407315.1/XM_024407314.1/XM_024407313.1
191rev	TCTGGAACGCGGAACACCAAAGG	TCTGGGATGCTGAACACCACAGG	.....*.*..*........*	4	0.21047	0.0546329	NC_037108.1	62534825	62534847	-	intergenic:XR_002955525.1/XR_002955524.1/XR_002955522.1/XR_002955521.1/XR_002955520.1/XR_002955523.1-XR_002955525.1/XR_002955524.1/XR_002955523.1/XR_002955522.1/XR_002955521.1/XR_002955520.1
191rev	TCTGGAACGCGGAACACCAAAGG	TCTGGGATGCTGAACACCACAGG	.....*.*..*........*	4	0.21047	0.0546329	NC_037108.1	60955095	60955117	-	exon:XM_024440053.1
191rev	TCTGGAACGCGGAACACCAAAGG	TCTGGGATGCTGAACACCACAGG	.....*.*..*........*	4	0.21047	0.0546329	NW_020128928.1	956389	956411	-	exon:XM_024404232.1
191rev	TCTGGAACGCGGAACACCAAAGG	TCTGAAACCCTGTACACCAATGG	....*...*.*.*.......	4	0.179126	0.0538462	NC_037127.1	34004430	34004452	-	exon:XM_024396171.1/XM_024396170.1/XM_024396169.1/XM_024396168.1
191rev	TCTGGAACGCGGAACACCAAAGG	TCTGAAACCCTGTACACCAATGG	....*...*.*.*.......	4	0.179126	0.0538462	NC_037110.1	16616803	16616825	+	exon:XR_002955975.1/XM_024444317.1/XM_024444316.1/XM_024444315.1/XM_024444313.1/XM_024444312.1/XM_024444311.1
191rev	TCTGGAACGCGGAACACCAAAGG	TGTGGATCCCGGTACACCAAGGG	.*....*.*...*.......	4	0.231062	0.0491639	NW_020128924.1	70123	70145	+	intergenic:Gap-XM_024404152.1/XM_024404151.1
191rev	TCTGGAACGCGGAACACCAAAGG	TGTGGATCCCGGTACACCAAGGG	.*....*.*...*.......	4	0.231062	0.0491639	NW_020128924.1	69456	69478	+	intergenic:Gap-XM_024404152.1/XM_024404151.1
191rev	TCTGGAACGCGGAACACCAAAGG	TGTGGATCCCGGTACACCAAGGG	.*....*.*...*.......	4	0.231062	0.0491639	NW_020128924.1	69739	69761	+	intergenic:Gap-XM_024404152.1/XM_024404151.1
191rev	TCTGGAACGCGGAACACCAAAGG	TGTGGATCCCGGTACACCAAGGG	.*....*.*...*.......	4	0.231062	0.0491639	NW_020128924.1	70085	70107	+	intergenic:Gap-XM_024404152.1/XM_024404151.1
191rev	TCTGGAACGCGGAACACCAAAGG	TGTGGATCCCGGTACACCAAGGG	.*....*.*...*.......	4	0.231062	0.0491639	NW_020128924.1	69933	69955	+	intergenic:Gap-XM_024404152.1/XM_024404151.1
191rev	TCTGGAACGCGGAACACCAAAGG	TGTGGATCCCGGTACACCAAGGG	.*....*.*...*.......	4	0.231062	0.0491639	NW_020128924.1	69777	69799	+	intergenic:Gap-XM_024404152.1/XM_024404151.1
191rev	TCTGGAACGCGGAACACCAAAGG	TGTGGATCCCGGTACACCAAGGG	.*....*.*...*.......	4	0.231062	0.0491639	NW_020128924.1	69701	69723	+	intergenic:Gap-XM_024404152.1/XM_024404151.1
191rev	TCTGGAACGCGGAACACCAAAGG	TCTCGTACGCCGTACACCAATGG	...*.*....*.*.......	4	0.185915	0.0486194	NC_037099.1	4635099	4635121	-	exon:XM_024390500.1/XM_024390493.1/XM_024390483.1
191rev	TCTGGAACGCGGAACACCAAAGG	TCTGTAACACGTAACATCAATGG	....*...*..*....*...	4	0.17397	0.0346154	NW_020129574.1	79312	79334	+	intergenic:XM_024407053.1-Gap
191rev	TCTGGAACGCGGAACACCAAAGG	TCTGGACCGCGGATCATCACTGG	......*......*..*..*	4	0.024559	0.0247475	NC_037106.1	41354608	41354630	-	intergenic:XM_024435617.1/XM_024435616.1/XM_024435615.1/XM_024435614.1/XM_024435620.1/XM_024435619.1/XM_024435618.1-XM_024436446.1
191rev	TCTGGAACGCGGAACACCAAAGG	TCTGGACCGCGGATCAACACTGG	......*......*..*..*	4	0.024559	0.0247475	NC_037109.1	35223847	35223869	-	intergenic:XM_024443454.1-XR_002955849.1
191rev	TCTGGAACGCGGAACACCAAAGG	TCTGGACCGCGGATCAACACTGG	......*......*..*..*	4	0.024559	0.0247475	NC_037115.1	13744239	13744261	+	intron:XM_024379102.1
191rev	TCTGGAACGCGGAACACCAAAGG	CCTGGAACGCCGAACAAGAAGGG	*.........*.....**..	4	0.0663105	0.0228571	NW_020131032.1	77105	77127	-	intergenic:LOC112240980-XM_024409178.1
191rev	TCTGGAACGCGGAACACCAAAGG	CCTGGAACGCCGAACAAGAAGGG	*.........*.....**..	4	0.0663105	0.0228571	NW_020129611.1	25818	25840	+	intergenic:Gap-XR_002951650.1
191rev	TCTGGAACGCGGAACACCAAAGG	TCTGGAACTCTGAAAAACAAAGG	........*.*...*.*...	4	0.0477578	0.0212726	NC_037098.1	46839948	46839970	-	intergenic:XM_024382256.1-XM_024382285.1/XM_024382295.1/XM_024382275.1
191rev	TCTGGAACGCGGAACACCAAAGG	GGAGGAAGGCGGAACACCAAGGA	***....*............	4	0.269167	0.0212183	NC_037119.1	15094550	15094572	+	intergenic:XM_024386002.1/XM_024386004.1-XM_024386004.1/XM_024386002.1
191rev	TCTGGAACGCGGAACACCAAAGG	TTCAAAACGCGGAACACCAAAGA	.****...............	4	0.257335	0.0211039	NC_037100.1	19465272	19465294	+	intergenic:XM_024417208.1-XM_024417210.1
191rev	TCTGGAACGCGGAACACCAAAGG	TCTGGAACGAGGAAGACAAGAGG	.........*....*..*.*	4	0.028863	0.0178431	NC_037101.1	78920377	78920399	+	intron:XM_024422202.1
191rev	TCTGGAACGCGGAACACCAAAGG	TCTGGAACGAGGAAGACAAGAGG	.........*....*..*.*	4	0.028863	0.0178431	NC_037101.1	78925556	78925578	+	exon:XM_024422202.1
191rev	TCTGGAACGCGGAACACCAAAGG	TCTGGGACGCGGGATATCAAAGG	.....*......*.*.*...	4	0.0345635	0.0144928	NC_037106.1	55619864	55619886	-	intergenic:XR_002955062.1-XM_024434266.1
191rev	TCTGGAACGCGGAACACCAAAGG	TCTGGAACGGGAAACAGCATCGG	.........*.*....*..*	4	0.104082	0.0128105	NC_037105.1	1059016	1059038	-	intron:XM_024434169.1
191rev	TCTGGAACGCGGAACACCAAAGG	TCTGAAACGCTGAACTTCAAAGG	....*.....*....**...	4	0.0552445	0	NC_037126.1	1943086	1943108	-	intergenic:XM_024393386.1-XM_024393210.1
191rev	TCTGGAACGCGGAACACCAAAGG	TCTGAATCCCGGAACACCAAGGG	....*.*.*...........	3	1.01264	0.204167	NC_037101.1	46178442	46178464	-	intergenic:XR_002953710.1-XM_024420900.1/XM_024420899.1
191rev	TCTGGAACGCGGAACACCAAAGG	TCTGAATCCCGGAACACCAAGGG	....*.*.*...........	3	1.01264	0.204167	NW_020128832.1	386219	386241	-	intergenic:XR_002950875.1-XM_024402345.1/XM_024402344.1
195forw	CTTCTCCTGAAATGAACCTTTGG	CTTTCCCTTAAATAAACCTTGGG	...**...*....*......	4	0.130252	0.32	NC_037124.1	15530197	15530219	-	intergenic:XR_002949788.1-XM_024391426.1
195forw	CTTCTCCTGAAATGAACCTTTGG	ATTCTCCTGAAAAAAAACTTGGG	*...........**..*...	4	0.0351504	0.242308	NC_037108.1	64931789	64931811	+	intergenic:XM_024440161.1-XM_024440162.1
195forw	CTTCTCCTGAAATGAACCTTTGG	CTAATTCTGAAATCAACCTTGGG	..**.*.......*......	4	0.127167	0.239374	NC_037100.1	9173104	9173126	+	intron:XM_024415964.1
195forw	CTTCTCCTGAAATGAACCTTTGG	CTTCTCCTCTGGTGAACCTTTGG	........****........	4	0.200517	0.223039	NC_037129.1	16442682	16442704	-	intron:XM_024397447.1
195forw	CTTCTCCTGAAATGAACCTTTGG	CAGCTCTTGAAATGAACCTAGGG	.**...*............*	4	0.469687	0.193359	NC_037104.1	42641644	42641666	+	intron:XM_024429796.1/XM_024429795.1/XM_024429794.1/XM_024429793.1
195forw	CTTCTCCTGAAATGAACCTTTGG	CCTGTTCTGAAATGAAACTTGGG	.*.*.*..........*...	4	0.368798	0.185714	NC_037124.1	15392382	15392404	-	intergenic:XR_002949788.1-XM_024391426.1
195forw	CTTCTCCTGAAATGAACCTTTGG	CTTCTAATGAAATACACCTTCGG	.....**......**.....	4	0.0236076	0.142451	NC_037097.1	2590999	2591021	+	intron:XM_024430459.1
195forw	CTTCTCCTGAAATGAACCTTTGG	CTTGTCTTTAAATGGACCTTTGG	...*..*.*.....*.....	4	0.160012	0.140833	NC_037106.1	14286987	14287009	-	intergenic:XM_024434786.1-XM_024434784.1
195forw	CTTCTCCTGAAATGAACCTTTGG	TTTGTCCTGAAAAGAACCATCGG	*..*........*.....*.	4	0.20389	0.0989011	NW_020129221.1	127613	127635	-	intergenic:XM_024405921.1-XM_024405922.1
195forw	CTTCTCCTGAAATGAACCTTTGG	CGTCTTCTGAAATGGACCTGGGG	.*...*........*....*	4	0.113084	0.0894706	NC_037100.1	60014310	60014332	-	intergenic:XM_024418731.1/XM_024418730.1-XM_024418732.1/XM_024418733.1
195forw	CTTCTCCTGAAATGAACCTTTGG	CTTCACGTAAAATGAACCTACGG	....*.*.*..........*	4	0.275531	0.085084	NC_037111.1	17897085	17897107	+	intron:XM_024373248.1/XM_024373247.1
195forw	CTTCTCCTGAAATGAACCTTTGG	CTCCTACTTCAATGAACCTTCGG	..*..*..**..........	4	0.458192	0.0707483	NW_020128984.1	194170	194192	+	intron:XM_024404722.1
195forw	CTTCTCCTGAAATGAACCTTTGG	CTACTGCTGAAAAGAACCCTAGG	..*..*......*.....*.	4	0.11514	0.0682077	NC_037108.1	10814568	10814590	-	intron:XM_024438282.1
195forw	CTTCTCCTGAAATGAACCTTTGG	CTTCTGATGAATTGAACATTCGG	.....**....*.....*..	4	0.0598968	0.0673077	NW_020142500.1	179540	179562	-	intergenic:XM_024412783.1/XM_024412782.1/XM_024412781.1/XM_024412780.1/XM_024412779.1/XM_024412778.1/XM_024412777.1/XM_024412776.1/XM_024412775.1/XM_024412774.1-XM_024412784.1
195forw	CTTCTCCTGAAATGAACCTTTGG	CACCTCCTGAAAATAACCTTTGG	.**.........**......	4	0.0854635	0.0669484	NC_037097.1	8135345	8135367	+	intergenic:XM_024428112.1-XR_002954355.1
195forw	CTTCTCCTGAAATGAACCTTTGG	CTTCTGATAAAAGGAACCTTGGG	.....**.*...*.......	4	0.133365	0.0628882	NC_037116.1	35604414	35604436	+	exon:XM_024381264.1
195forw	CTTCTCCTGAAATGAACCTTTGG	CCCCTTCTGAAATGAACCTGGGG	.**..*.............*	4	0.416048	0.0601955	NC_037110.1	16187190	16187212	-	intron:XM_024444296.1/XM_024444295.1
195forw	CTTCTCCTGAAATGAACCTTTGG	CCTCTGGTGAAATGAACCATTGG	.*...**...........*.	4	0.206091	0.057623	NC_037109.1	11783422	11783444	-	intergenic:LOC112265825-XM_024443378.1
195forw	CTTCTCCTGAAATGAACCTTTGG	CCTCTCCTGCAGTGCACCTTGGG	.*.......*.*..*.....	4	0.182543	0.0562771	NC_037130.1	8156547	8156569	-	intron:XM_024398291.1
195forw	CTTCTCCTGAAATGAACCTTTGG	CTGCTCCTTAAACTAACCTTTGG	..*.....*...**......	4	0.0497017	0.0561404	NC_037110.1	23081967	23081989	+	exon:XM_024445641.1
195forw	CTTCTCCTGAAATGAACCTTTGG	ACTCTCCTGAAATGGACCTCGGG	**............*....*	4	0.186916	0.0506494	NC_037125.1	15062671	15062693	-	intron:XM_024392321.1
195forw	CTTCTCCTGAAATGAACCTTTGG	CTTCAGCTGAGATGAACCATCGG	....**....*.......*.	4	0.158988	0.0464286	NC_037123.1	2693961	2693983	-	intergenic:XM_024390052.1-XM_024389915.1
195forw	CTTCTCCTGAAATGAACCTTTGG	CCTCTCCTGACATGAAACATCGG	.*........*.....*.*.	4	0.10657	0.0457143	NW_020130185.1	66343	66365	-	intergenic:XM_024408182.1-Gap
195forw	CTTCTCCTGAAATGAACCTTTGG	CCTCTCCTGACATGAAACATCGG	.*........*.....*.*.	4	0.10657	0.0457143	NW_020131035.1	17511	17533	-	intron:XM_024409182.1
195forw	CTTCTCCTGAAATGAACCTTTGG	CTACTCCTGTAAGTAACCTTTGG	..*......*..**......	4	0.0749185	0.0438436	NC_037126.1	25718195	25718217	+	intergenic:XM_024394112.1/XM_024394111.1/XM_024394110.1/XM_024394109.1/XM_024394108.1-XM_024394112.1/XM_024394108.1/XM_024394110.1/XM_024394111.1/XM_024394109.1
195forw	CTTCTCCTGAAATGAACCTTTGG	GTTCTCCTGTAATTTACCTTGGG	*........*...**.....	4	0.0552824	0.0429668	NW_020128823.1	22347	22369	+	intron:XM_024401701.1
195forw	CTTCTCCTGAAATGAACCTTTGG	GTTCTCCTGTAATTTACCTTGGG	*........*...**.....	4	0.0552824	0.0429668	NW_020128808.1	1555393	1555415	-	intron:XM_024399992.1
195forw	CTTCTCCTGAAATGAACCTTTGG	CTCCAGCTGACATGAACCTTTGG	..*.**....*.........	4	0.451897	0.0428571	NC_037107.1	25631900	25631922	-	intron:XM_024437262.1/XM_024437261.1/XM_024437258.1
195forw	CTTCTCCTGAAATGAACCTTTGG	CTTCTTCTGAAATGCACTGTTGG	.....*........*..**.	4	0.0150475	0.0407004	NC_037098.1	52221412	52221434	+	intergenic:XM_024383936.1-XM_024383947.1
195forw	CTTCTCCTGAAATGAACCTTTGG	CTTCTCCTGAATAGGACCGTAGG	...........**.*...*.	4	0.02194	0.0375	NW_020142588.1	200917	200939	+	intergenic:XM_024415938.1-XR_002953037.1
195forw	CTTCTCCTGAAATGAACCTTTGG	CTTCTCCTGAATAGGACCGTAGG	...........**.*...*.	4	0.02194	0.0375	NW_020142588.1	308287	308309	-	intergenic:XR_002953037.1-LOC112247211
195forw	CTTCTCCTGAAATGAACCTTTGG	CTTGTCCTGCATTGAACTTTTGG	...*.....*.*.....*..	4	0.133502	0.0357143	NC_037101.1	19973201	19973223	-	intron:XM_024420123.1
195forw	CTTCTCCTGAAATGAACCTTTGG	CATCTCCTGTAATTAACCTGTGG	.*.......*...*.....*	4	0.09571	0.0351344	NC_037098.1	16699777	16699799	-	intergenic:XM_024445273.1-XM_024445325.1/XM_024445314.1/XM_024445303.1/XM_024445293.1/XM_024445284.1
195forw	CTTCTCCTGAAATGAACCTTTGG	CTTCTCCTGTCTTTAACCTTGGG	.........***.*......	4	0.0488986	0.0313725	NC_037099.1	14939624	14939646	+	intergenic:XM_024412906.1-XM_024395110.1
195forw	CTTCTCCTGAAATGAACCTTTGG	GTTCTCCTGAGAGGAGCCTTGGG	*.........*.*..*....	4	0.0584931	0.0297732	NC_037097.1	56300662	56300684	+	intron:XM_024426186.1/XM_024426177.1/XM_024426168.1/XM_024426158.1/XM_024426152.1/XM_024426143.1
195forw	CTTCTCCTGAAATGAACCTTTGG	TTCCTCCTGAACGGAACCTTGGG	*.*........**.......	4	0.282202	0.0294214	NC_037106.1	48930434	48930456	-	exon:XM_024434246.1
195forw	CTTCTCCTGAAATGAACCTTTGG	CTTCTCCTGAAGGGAACAATCGG	...........**....**.	4	0.0160456	0.0289855	NC_037100.1	7480904	7480926	-	intergenic:rna8318-LOC112249774
195forw	CTTCTCCTGAAATGAACCTTTGG	CCTCTCCTGAAAGGCATCTTGGG	.*..........*.*.*...	4	0.0632235	0.0284585	NC_037127.1	7473077	7473099	+	intron:XM_024395083.1/XM_024395082.1
195forw	CTTCTCCTGAAATGAACCTTTGG	CTTCTCCTGAACATAACCTAAGG	...........***.....*	4	0.0161478	0.0273279	NC_037101.1	92836458	92836480	-	intergenic:XM_024422635.1-XM_024422797.1
195forw	CTTCTCCTGAAATGAACCTTTGG	CTCTTCCTGAACTGCACCTTTGG	..**.......*..*.....	4	0.195426	0.024607	NC_037104.1	6432543	6432565	-	intergenic:XM_024428758.1-XM_024428760.1/XM_024428759.1
195forw	CTTCTCCTGAAATGAACCTTTGG	CTTCTTCTGGATTGAACGTTAGG	.....*...*.*.....*..	4	0.0807686	0.0229277	NC_037104.1	37389999	37390021	-	intergenic:XR_002954513.1-XM_024429692.1
195forw	CTTCTCCTGAAATGAACCTTTGG	CTTGTCCAGTAATGAAGCTTTGG	...*...*.*......*...	4	0.533	0.0207612	NC_037104.1	53916229	53916251	-	intergenic:XM_024428606.1-XM_024430103.1/XM_024430102.1
195forw	CTTCTCCTGAAATGAACCTTTGG	CTCCTCCAAAAATGAACCTCTGG	..*....**..........*	4	0.397765	0.0200371	NW_020142589.1	161555	161577	-	intergenic:XM_024415940.1-Gap
195forw	CTTCTCCTGAAATGAACCTTTGG	CTTCTCCTGAAATAGACGATGGG	.............**..**.	4	0.00321721	0.0185714	NC_037120.1	17113144	17113166	-	exon:XM_024386879.1/XM_024386878.1/XM_024386877.1/XM_024386876.1
195forw	CTTCTCCTGAAATGAACCTTTGG	CTACTCGTGAAATGAGCCATAGG	..*...*........*..*.	4	0.0577709	0.0184689	NW_020128890.1	295181	295203	-	intergenic:XM_024403860.1-XR_002951058.1/XM_024403854.1
195forw	CTTCTCCTGAAATGAACCTTTGG	GTTCTCCTAAAATGAACCCCTGG	*.......*.........**	4	0.134234	0.0147199	NC_037117.1	12452035	12452057	-	intergenic:XM_024382935.1/XM_024382934.1/XM_024382933.1-XM_024382381.1
195forw	CTTCTCCTGAAATGAACCTTTGG	CGTCTCCTGAAAATAACCTCAGG	.*..........**.....*	4	0.0402169	0.0140979	NC_037110.1	36645114	36645136	+	intergenic:XM_024445142.1-XM_024445690.1
195forw	CTTCTCCTGAAATGAACCTTTGG	CTCCTCCTGAAAATAACCTGAGG	..*.........**.....*	4	0.037539	0.0139625	NC_037101.1	29841695	29841717	-	intergenic:XM_024420402.1/XM_024420401.1-XM_024420401.1/XM_024420402.1
195forw	CTTCTCCTGAAATGAACCTTTGG	CTTCTCCTGAACTGCACTGTTGG	...........*..*..**.	4	0.0111117	0.0115345	NC_037124.1	20638595	20638617	-	intron:XM_024391588.1
195forw	CTTCTCCTGAAATGAACCTTTGG	CTTCTCATGCAATGAACGCTAGG	......*..*.......**.	4	0.0583786	0.0091954	NC_037108.1	32856664	32856686	+	intron:XM_024439162.1
195forw	CTTCTCCTGAAATGAACCTTTGG	CTTCTCCTGAAAGGTAACCTAGG	............*.*.*.*.	4	0.0171685	0.00671664	NW_020142527.1	2180891	2180913	-	intergenic:XM_024414525.1-XM_024414528.1
195forw	CTTCTCCTGAAATGAACCTTTGG	CTTCTCCTGAAAGGTAACCTAGG	............*.*.*.*.	4	0.0171685	0.00671664	NC_037103.1	75900429	75900451	-	intergenic:XM_024428003.1-XM_024428341.1
195forw	CTTCTCCTGAAATGAACCTTTGG	CTTCTCCTATAATGACCTTTGGG	........**.....*.*..	4	0.0271419	0	NC_037119.1	6137814	6137836	+	intron:XM_024385582.1
195forw	CTTCTCCTGAAATGAACCTTTGG	CTTGTCTTGAAATCACCCTTGGG	...*..*......*.*....	4	0.0263113	0	NC_037116.1	20497028	20497050	+	intron:XM_024382130.1/XM_024382129.1
195forw	CTTCTCCTGAAATGAACCTTTGG	CTCATCCTGACATGACCCTTCGG	..**......*....*....	4	0.141483	0	NC_037102.1	55199564	55199586	+	intergenic:LOC112253514-XR_002954006.1
195forw	CTTCTCCTGAAATGAACCTTTGG	TTTCTCCTGAAGTGACGCTTGGG	*..........*...**...	4	0.0515854	0	NW_020142512.1	2128416	2128438	+	intergenic:XM_024414007.1/XM_024414004.1-XM_024414007.1/XM_024414005.1/XM_024414004.1
195forw	CTTCTCCTGAAATGAACCTTTGG	CTTCTCCTCAAATGACCATCTGG	........*......*.*.*	4	0.012289	0	NC_037116.1	2589799	2589821	-	intergenic:XM_024381472.1/XM_024381471.1-XM_024381473.1
195forw	CTTCTCCTGAAATGAACCTTTGG	TTTCTCCTGAAGTGACGCTTGGG	*..........*...**...	4	0.0515854	0	NW_020142512.1	1704665	1704687	-	intergenic:XM_024414010.1/XM_024414009.1/XM_024414008.1-XM_024414010.1/XM_024414008.1
195forw	CTTCTCCTGAAATGAACCTTTGG	CTCATCCTGAAATGACCCTCCGG	..**...........*...*	4	0.111973	0	NC_037100.1	54802467	54802489	-	intergenic:XM_024418469.1/XM_024418464.1-XM_024418462.1
195forw	CTTCTCCTGAAATGAACCTTTGG	CTTCTAATGAAATGATCATTGGG	.....**........*.*..	4	0.0209395	0	NW_020128910.1	226560	226582	+	intergenic:XM_024404018.1-Gap
195forw	CTTCTCCTGAAATGAACCTTTGG	GTTCACCTGAAATGATGCTTCGG	*...*..........**...	4	0.104848	0	NC_037127.1	13411432	13411454	+	intron:XM_024395409.1
195forw	CTTCTCCTGAAATGAACCTTTGG	CTCATCCTGACATGACCCTTAGG	..**......*....*....	4	0.141483	0	NC_037121.1	20134511	20134533	-	intergenic:XM_024388458.1-LOC112224792
195forw	CTTCTCCTGAAATGAACCTTTGG	CTTCTCCTGAAAATAACCTAAGG	............**.....*	3	0.0611598	0.103846	NC_037122.1	5001145	5001167	+	intron:XM_024388695.1/XM_024388694.1/XM_024388693.1/XM_024388691.1
195forw	CTTCTCCTGAAATGAACCTTTGG	CAGCTCCTGTAATGAACCTTAAG	.**......*..........	3	0.485345	0.0967823	NC_037108.1	8483160	8483182	+	intergenic:XM_024440547.1-XM_024440588.1
195forw	CTTCTCCTGAAATGAACCTTTGG	CTGCTCCTGTAATGAACCTGAGG	..*......*.........*	3	1.26895	0.0778547	NC_037126.1	41509782	41509804	-	intron:LOC112229028
195forw	CTTCTCCTGAAATGAACCTTTGG	CTAATCCTGAAATGAATCTTGAG	..**............*...	3	0.239224	0.0727745	NC_037097.1	49317861	49317883	+	exon:XM_024423977.1/XM_024423968.1/XM_024423959.1
195forw	CTTCTCCTGAAATGAACCTTTGG	CTGCTCCTGCAATGAACCCTGGG	..*......*........*.	3	0.958556	0.045977	NC_037114.1	22902734	22902756	+	exon:XM_024378207.1
195forw	CTTCTCCTGAAATGAACCTTTGG	CTGCTCCTGCAATGAACCCTGGG	..*......*........*.	3	0.958556	0.045977	NC_037114.1	25598817	25598839	+	exon:XM_024378289.1
195forw	CTTCTCCTGAAATGAACCTTTGG	CTCATCCTGACATGAACCTTCAG	..**......*.........	3	0.292472	0.0374269	NW_020130329.1	10946	10968	-	intergenic:Gap-XR_002951950.1
195forw	CTTCTCCTGAAATGAACCTTTGG	CTCATCCTGACATGAACCTTCAG	..**......*.........	3	0.292472	0.0374269	NC_037097.1	43495749	43495771	+	intron:XM_024422229.1
195forw	CTTCTCCTGAAATGAACCTTTGG	CTCATCCTGACATGAACCTTCAG	..**......*.........	3	0.292472	0.0374269	NW_020130329.1	7144	7166	-	intergenic:Gap-XR_002951950.1
195forw	CTTCTCCTGAAATGAACCTTTGG	CTCATCCTGACATGAACCTTCAG	..**......*.........	3	0.292472	0.0374269	NC_037117.1	16061334	16061356	+	intergenic:XM_024383069.1-XM_024383072.1/XM_024383070.1/XM_024383071.1/XM_024383075.1/XM_024383076.1
195forw	CTTCTCCTGAAATGAACCTTTGG	CTGAGCCTGAAATGAACCTTTGA	..***...............	3	0.457485	0.0187135	NW_020129084.1	189144	189166	+	intergenic:XM_024405295.1-XM_024405302.1
195forw	CTTCTCCTGAAATGAACCTTTGG	CTCATCCTGAAATGAACCTCCAG	..**...............*	3	0.275558	0.00850611	NC_037125.1	18841546	18841568	-	intron:XM_024392375.1
195forw	CTTCTCCTGAAATGAACCTTTGG	CTCATCCTGAAATGAACCTCCAG	..**...............*	3	0.275558	0.00850611	NC_037111.1	18219933	18219955	-	intergenic:XM_024373254.1/XM_024373255.1/XM_024373253.1-XM_024373255.1/XM_024373254.1/XM_024373253.1
195forw	CTTCTCCTGAAATGAACCTTTGG	CTTCACCTGGAATGAAGCTTCAG	....*....*......*...	3	0.210864	0.00423626	NC_037112.1	16209555	16209577	-	intron:XM_024374644.1/XM_024374642.1
195forw	CTTCTCCTGAAATGAACCTTTGG	CTTCTCCTAAACTGATCCTTGGG	........*..*...*....	3	0.131513	0	NC_037124.1	37949003	37949025	+	intergenic:XM_024392160.1-XM_024392161.1/XM_024392160.1
195forw	CTTCTCCTGAAATGAACCTTTGG	CTTCTCCTAAACTGATCCTTGGG	........*..*...*....	3	0.131513	0	NW_020128829.1	270157	270179	-	intergenic:XM_024402180.1-XM_024402178.1
195forw	CTTCTCCTGAAATGAACCTTTGG	CTTATCCTGACATGACCCTTTGG	...*......*....*....	3	0.28384	0	NC_037103.1	79770079	79770101	-	intron:XM_024428088.1
195forw	CTTCTCCTGAAATGAACCTTTGG	CTTCTCCTAAACTGATCCTTGGG	........*..*...*....	3	0.131513	0	NW_020142548.1	3294422	3294444	+	intergenic:XM_024415387.1-XM_024415388.1/XM_024415387.1
195forw	CTTCTCCTGAAATGAACCTTTGG	CTTCTCCTCAAATGAAACTTAAG	........*.......*...	2	0.354719	0.0651472	NC_037099.1	20483565	20483587	+	intron:XM_024397528.1
202rev	TCTCTGCAACCTCTGGAACGCGG	GGTCTGGAACCTCTGGAACATGG	**....*............*	4	0.476356	0.293562	NC_037114.1	17201547	17201569	-	exon:XM_024378039.1/XM_024378038.1/XM_024378037.1/XM_024378036.1/XM_024378035.1
202rev	TCTCTGCAACCTCTGGAACGCGG	GCTCTGCGGCCTCTGGAATGAGG	*......**.........*.	4	0.321904	0.215831	NW_020128805.1	538945	538967	-	intergenic:XR_002950665.1-XR_002950670.1
202rev	TCTCTGCAACCTCTGGAACGCGG	GCTCTGCGGCCTCTGGAATGAGG	*......**.........*.	4	0.321904	0.215831	NC_037112.1	52767002	52767024	+	intergenic:XR_002948272.1-XR_002948356.1
202rev	TCTCTGCAACCTCTGGAACGCGG	GCTCTGGAACCTCTGGATCAAGG	*.....*..........*.*	4	0.0933659	0.210997	NC_037100.1	9128700	9128722	+	intron:XM_024415964.1
202rev	TCTCTGCAACCTCTGGAACGCGG	TGTCATCAAACTCTGGAACGTGG	.*..**...*..........	4	0.760553	0.200966	NW_020128927.1	268610	268632	-	intron:LOC112235720
202rev	TCTCTGCAACCTCTGGAACGCGG	TGTCATCAAACTCTGGAACGTGG	.*..**...*..........	4	0.760553	0.200966	NW_020128927.1	284260	284282	+	exon:LOC112235720
202rev	TCTCTGCAACCTCTGGAACGCGG	CTTCTGCAACCTCTGGATCCTGG	**...............*.*	4	0.1367	0.166976	NC_037101.1	78238117	78238139	+	intergenic:XR_002953646.1-XM_024422188.1
202rev	TCTCTGCAACCTCTGGAACGCGG	TCTTGGCAACCTCAGGATCGGGG	...**........*...*..	4	0.0438984	0.158476	NC_037097.1	44726047	44726069	+	exon:XM_024435833.1
202rev	TCTCTGCAACCTCTGGAACGCGG	TATCTACAACCTCTGGATAGAGG	.*...*...........**.	4	0.0591418	0.155844	NC_037111.1	13240400	13240422	+	intron:XM_024373100.1
202rev	TCTCTGCAACCTCTGGAACGCGG	CCTCTTCAACCTCAGGAGCGTGG	*....*.......*...*..	4	0.027975	0.141497	NW_020142662.1	189143	189165	+	intergenic:XM_024416488.1-Gap
202rev	TCTCTGCAACCTCTGGAACGCGG	GCACTGGAACCTCTGGAACCAGG	*.*...*............*	4	0.469687	0.137794	NC_037127.1	18513977	18513999	-	intergenic:XR_002950200.1/XR_002950201.1-rna60059
202rev	TCTCTGCAACCTCTGGAACGCGG	GCTCTGCCGCCTCTGGAATGAGG	*......**.........*.	4	0.321904	0.126135	NC_037114.1	1688928	1688950	+	intergenic:XM_024377621.1-XM_024377550.1
202rev	TCTCTGCAACCTCTGGAACGCGG	TCTCTGCCAGACCTGGAACGAGG	.......*.***........	4	0.328178	0.118421	NW_020128813.1	5888061	5888083	-	exon:XM_024400808.1
202rev	TCTCTGCAACCTCTGGAACGCGG	TCTCTGCCAGACCTGGAACGAGG	.......*.***........	4	0.328178	0.118421	NC_037127.1	27411883	27411905	+	exon:XM_024395901.1
202rev	TCTCTGCAACCTCTGGAACGCGG	TCTCCTCAACCTCTGGAGCCTGG	....**...........*.*	4	0.0782924	0.114286	NC_037115.1	28305909	28305931	-	intergenic:LOC112218573-XM_024380327.1
202rev	TCTCTGCAACCTCTGGAACGCGG	CCTCTGCATCCTCTGGATCCTGG	*.......*........*.*	4	0.0835235	0.110204	NC_037104.1	14066847	14066869	-	intergenic:XR_002954361.1/XM_024429017.1-XM_024430620.1
202rev	TCTCTGCAACCTCTGGAACGCGG	TCCCTCAAACCTCTGGATCGGGG	..*..**..........*..	4	0.126439	0.109578	NC_037108.1	6987178	6987200	-	intergenic:XM_024438204.1-XM_024438205.1
202rev	TCTCTGCAACCTCTGGAACGCGG	TCTGTGCAACCGCTGAAAAGGGG	...*.......*...*..*.	4	0.0422062	0.107143	NC_037107.1	42729475	42729497	+	intergenic:XM_024437762.1-XR_002955284.1
202rev	TCTCTGCAACCTCTGGAACGCGG	TCTCTGCTCCCTCTGGAATACGG	.......**.........**	4	0.120641	0.105965	NC_037122.1	29597027	29597049	-	intergenic:XR_002949512.1-XM_024389528.1
202rev	TCTCTGCAACCTCTGGAACGCGG	ACTCTGGAACTTCTGGAACTAGG	*.....*...*........*	4	0.264378	0.101357	NC_037100.1	62454852	62454874	+	intergenic:XM_024418809.1/XM_024418808.1-XM_024418809.1
202rev	TCTCTGCAACCTCTGGAACGCGG	GCGCTGGAACCTCTGGAACCAGG	*.*...*............*	4	0.469687	0.096456	NC_037122.1	31979333	31979355	+	intergenic:LOC112224852-XM_024389607.1/XM_024389606.1
202rev	TCTCTGCAACCTCTGGAACGCGG	GCTCTGGAACCTCTGGATCCAGG	*.....*..........*.*	4	0.0933659	0.096456	NC_037116.1	1954153	1954175	-	intergenic:XM_024381461.1-XM_024381462.1
202rev	TCTCTGCAACCTCTGGAACGCGG	GCTCTGGCACCTCTGGAATGAGG	*.....**..........*.	4	0.359838	0.0890363	NW_020142609.1	820393	820415	-	intergenic:XM_024416152.1-Gap
202rev	TCTCTGCAACCTCTGGAACGCGG	GCTCTGGCACCTCTGGAATGAGG	*.....**..........*.	4	0.359838	0.0890363	NC_037099.1	39543908	39543930	-	intergenic:XR_002952738.1/XR_002952737.1-XM_024403102.1/XM_024403097.1
202rev	TCTCTGCAACCTCTGGAACGCGG	GCTCTGGCACCTCTGGAATGAGG	*.....**..........*.	4	0.359838	0.0890363	NC_037109.1	72462146	72462168	-	intron:XM_024443652.1
202rev	TCTCTGCAACCTCTGGAACGCGG	GCTCTGGCACCTCTGGAATGAGG	*.....**..........*.	4	0.359838	0.0890363	NC_037122.1	29695177	29695199	-	intergenic:XM_024389532.1-XM_024389535.1/XM_024389534.1/XM_024389533.1
202rev	TCTCTGCAACCTCTGGAACGCGG	TCTCTGCAGTTTCTGGAAAGGGG	........***.......*.	4	0.140754	0.0827408	NW_020130586.1	226678	226700	+	intron:XR_002952037.1
202rev	TCTCTGCAACCTCTGGAACGCGG	TCTCTGCAGTTTCTGGAAAGGGG	........***.......*.	4	0.140754	0.0827408	NW_020130586.1	92084	92106	-	intron:XR_002952038.1
202rev	TCTCTGCAACCTCTGGAACGCGG	TCGCATCAACCTCTGGAACCTGG	..*.**.............*	4	0.393859	0.0714286	NC_037108.1	26203674	26203696	+	exon:XM_024438858.1/XM_024438857.1
202rev	TCTCTGCAACCTCTGGAACGCGG	TCGCTGCAGCCTCTGGAGCCTGG	..*.....*........*.*	4	0.0779619	0.0571429	NC_037110.1	55419227	55419249	+	intergenic:XM_024445748.1-Gap
202rev	TCTCTGCAACCTCTGGAACGCGG	GCTCTGCCACTTCTGGAACCTGG	*......*..*........*	4	0.387083	0.0540577	NC_037104.1	22428315	22428337	+	intergenic:XM_024429337.1/XM_024429336.1/XM_024429339.1/XM_024429338.1-XM_024429340.1
202rev	TCTCTGCAACCTCTGGAACGCGG	TCACCGCAAGCTCTGGACCGGGG	..*.*....*.......*..	4	0.281816	0.0529101	NC_037098.1	43601575	43601597	-	intergenic:XM_024381267.1/XM_024381275.1-XM_024381275.1/XM_024381267.1
202rev	TCTCTGCAACCTCTGGAACGCGG	TCTCTGGGAGCTATGGAACGAGG	......**.*..*.......	4	0.332281	0.0516172	NW_020129983.1	51554	51576	-	intergenic:XM_024407873.1/XM_024407874.1-Gap
202rev	TCTCTGCAACCTCTGGAACGCGG	TCTCTGCAGGCCCTGGACCGGGG	........**.*.....*..	4	0.0776386	0.0467836	NC_037107.1	43570404	43570426	-	intergenic:XM_024437922.1-XM_024437788.1
202rev	TCTCTGCAACCTCTGGAACGCGG	TCTGTGCATGCTCTGGAGCGCGG	...*....**.......*..	4	0.165792	0.0466667	NC_037101.1	67979863	67979885	+	exon:XM_024421800.1
202rev	TCTCTGCAACCTCTGGAACGCGG	TCTGTGCATGCTCTGGAGCGCGG	...*....**.......*..	4	0.165792	0.0466667	NC_037097.1	25842010	25842032	+	exon:XM_024418375.1
202rev	TCTCTGCAACCTCTGGAACGCGG	TCTATTCAACCTCAGGTACGAGG	...*.*.......*..*...	4	0.0521686	0.0463381	NW_020142728.1	502270	502292	-	intergenic:XM_024416781.1-Gap
202rev	TCTCTGCAACCTCTGGAACGCGG	TCTATTCAACCTCAGGTACGAGG	...*.*.......*..*...	4	0.0521686	0.0463381	NW_020142728.1	406923	406945	+	intergenic:XM_024416794.1-XM_024416796.1
202rev	TCTCTGCAACCTCTGGAACGCGG	CCTCTTCAACCTCAGGAAGGAGG	*....*.......*....*.	4	0.0474928	0.0442177	NC_037122.1	20047571	20047593	-	intergenic:XM_024388581.1-XM_024389157.1
202rev	TCTCTGCAACCTCTGGAACGCGG	CCTCTTCAACCTCAGGAAGGAGG	*....*.......*....*.	4	0.0474928	0.0442177	NC_037101.1	49939556	49939578	+	intron:LOC112250662
202rev	TCTCTGCAACCTCTGGAACGCGG	CCTCTTCAACCTCAGGAAGGAGG	*....*.......*....*.	4	0.0474928	0.0442177	NC_037126.1	41191783	41191805	+	intergenic:XM_024394892.1-LOC112228190
202rev	TCTCTGCAACCTCTGGAACGCGG	TCTCTGTAGCCTCTGGACCCAGG	......*.*........*.*	4	0.0512697	0.0442177	NW_020131227.1	39212	39234	+	exon:LOC112241193
202rev	TCTCTGCAACCTCTGGAACGCGG	TCTCTGTAGCCTCTGGACCCAGG	......*.*........*.*	4	0.0512697	0.0442177	NW_020131227.1	107361	107383	-	intergenic:LOC112241193-XR_002952227.1
202rev	TCTCTGCAACCTCTGGAACGCGG	TCTCTGCCATGTCTGGAACCTGG	.......*.**........*	4	0.320402	0.0432173	NC_037128.1	4653650	4653672	-	exon:XM_024396315.1
202rev	TCTCTGCAACCTCTGGAACGCGG	TCTCTGCCATGTCTGGAACCTGG	.......*.**........*	4	0.320402	0.0432173	NC_037098.1	3238762	3238784	-	exon:XM_024440548.1
202rev	TCTCTGCAACCTCTGGAACGCGG	TATCTGGAACCTCTGGCACTGGG	.*....*.........*..*	4	0.183397	0.0422774	NC_037122.1	42952285	42952307	+	intron:XM_024388494.1
202rev	TCTCTGCAACCTCTGGAACGCGG	TCGCTGGAAGCTCTGGAATGTGG	..*...*..*........*.	4	0.309343	0.0422323	NC_037112.1	28962822	28962844	+	intergenic:XM_024374870.1/XM_024374869.1/XM_024374868.1/XM_024374867.1/XM_024374866.1-LOC112215152
202rev	TCTCTGCAACCTCTGGAACGCGG	TCGCTGGAAGCTCTGGAATGGGG	..*...*..*........*.	4	0.309343	0.0422323	NC_037103.1	62842816	62842838	+	intergenic:XM_024427491.1-LOC112254705
202rev	TCTCTGCAACCTCTGGAACGCGG	TCGCTGGAAGCTCTGGAATGTGG	..*...*..*........*.	4	0.309343	0.0422323	NC_037110.1	41659796	41659818	-	intergenic:XM_024445376.1-LOC112267436
202rev	TCTCTGCAACCTCTGGAACGCGG	TCTCTGCAATTTCTTGAACAAGG	.........**...*....*	4	0.0817295	0.0387847	NC_037098.1	3705884	3705906	+	exon:XM_024440668.1
202rev	TCTCTGCAACCTCTGGAACGCGG	TCTCTGCAATTTCTTGAACAAGG	.........**...*....*	4	0.0817295	0.0387847	NC_037128.1	5134120	5134142	+	exon:XM_024396505.1/XM_024396504.1
202rev	TCTCTGCAACCTCTGGAACGCGG	TCTCTCAAACCTCTGGGAAGTGG	.....**.........*.*.	4	0.0753276	0.0386746	NC_037122.1	21506258	21506280	-	intergenic:LOC112225355-XM_024389266.1
202rev	TCTCTGCAACCTCTGGAACGCGG	GCTCTGCCACCTCTGGACTGAGG	*......*.........**.	4	0.103262	0.0360385	NC_037106.1	21327653	21327675	+	intergenic:XM_024436380.1-XM_024434957.1
202rev	TCTCTGCAACCTCTGGAACGCGG	TCTCGCCAACCTCTGGGAAGTGG	....**..........*.*.	4	0.110289	0.0330023	NC_037100.1	56090634	56090656	-	intergenic:XM_024418520.1-XM_024418521.1/XM_024418522.1
202rev	TCTCTGCAACCTCTGGAACGCGG	ACTCTGCAAGCTCAGGAAGGAGG	*........*...*....*.	4	0.0722989	0.0300926	NC_037101.1	50950146	50950168	+	intergenic:XM_024421032.1/XM_024421033.1-XR_002953713.1
202rev	TCTCTGCAACCTCTGGAACGCGG	TCTCTGGAGCCTCTGGACTGAGG	......*.*........**.	4	0.0387289	0.0275803	NC_037115.1	8780558	8780580	-	intergenic:XM_024378955.1-XM_024380292.1
202rev	TCTCTGCAACCTCTGGAACGCGG	TCGCTGGAAGCTCCGGAACGTGG	..*...*..*...*......	4	0.132221	0.0261438	NC_037104.1	51276495	51276517	-	intergenic:XM_024429980.1/XM_024429981.1-XM_024429983.1/XM_024429982.1
202rev	TCTCTGCAACCTCTGGAACGCGG	TCTCATCAACCTCAGGAAGGTGG	....**.......*....*.	4	0.0426834	0.0257937	NC_037102.1	61340297	61340319	+	intergenic:XM_024424800.1/XM_024424799.1-XM_024424801.1
202rev	TCTCTGCAACCTCTGGAACGCGG	TCACTGGAAGCTCTGGACCGTGG	..*...*..*.......*..	4	0.19248	0.0248988	NC_037128.1	5270520	5270542	+	intron:XM_024396510.1
202rev	TCTCTGCAACCTCTGGAACGCGG	TCGCTGCAGGCTCTGGACCGTGG	..*.....**.......*..	4	0.172189	0.0246914	NC_037110.1	39731131	39731153	+	intron:XM_024445267.1/XM_024445266.1
202rev	TCTCTGCAACCTCTGGAACGCGG	TCTCTGGCACCTCTGGACTGCGG	......**.........**.	4	0.0633861	0.0177302	NC_037097.1	4641156	4641178	-	intron:XM_024432492.1
202rev	TCTCTGCAACCTCTGGAACGCGG	TCGCTGGAAGCTCTGGACCGCGG	..*...*..*.......*..	4	0.19248	0.0174292	NW_020128804.1	17110329	17110351	+	intergenic:XM_024399544.1/XM_024399545.1-XM_024399549.1/XM_024399548.1/XM_024399547.1/XM_024399546.1
202rev	TCTCTGCAACCTCTGGAACGCGG	TCGCTGGAAGCTCTGGACCGCGG	..*...*..*.......*..	4	0.19248	0.0174292	NC_037103.1	26420626	26420648	+	intergenic:XM_024426292.1/XM_024426293.1-XM_024426297.1/XM_024426296.1/XM_024426295.1/XM_024426294.1
202rev	TCTCTGCAACCTCTGGAACGCGG	TCGCTGGAAGCTCTGGACCGCGG	..*...*..*.......*..	4	0.19248	0.0174292	NC_037103.1	24345107	24345129	+	intergenic:XM_024426254.1/XM_024426255.1-XM_024426260.1/XM_024426259.1/XM_024426258.1/XM_024426257.1
202rev	TCTCTGCAACCTCTGGAACGCGG	TCGCTGGAAGCTCTGGACCGCGG	..*...*..*.......*..	4	0.19248	0.0174292	NC_037116.1	12079587	12079609	-	intergenic:XM_024381869.1/XM_024381868.1/XM_024381867.1/XM_024381865.1-XM_024381872.1/XM_024381873.1
202rev	TCTCTGCAACCTCTGGAACGCGG	TCGCTGGAAGCTCTGGACCGCGG	..*...*..*.......*..	4	0.19248	0.0174292	NW_020128804.1	6782289	6782311	-	intergenic:XM_024399268.1/XM_024399267.1/XM_024399266.1/XM_024399265.1-XM_024399272.1/XM_024399273.1
202rev	TCTCTGCAACCTCTGGAACGCGG	TCTCTGCTACCGCTGGCAAGTGG	.......*...*....*.*.	4	0.0853674	0.0162065	NC_037109.1	68813304	68813326	-	intergenic:XM_024443245.1-LOC112265697
202rev	TCTCTGCAACCTCTGGAACGCGG	TCTCTCCAACTTCTGGGAAGTGG	.....*....*.....*.*.	4	0.0612105	0.0158665	NW_020142520.1	1069264	1069286	-	intergenic:XM_024414244.1/XM_024414243.1/XM_024414242.1/XM_024414240.1-LOC112245981
202rev	TCTCTGCAACCTCTGGAACGCGG	TCTCTCCAACTTCTGGGAAGTGG	.....*....*.....*.*.	4	0.0612105	0.0158665	NC_037107.1	17118715	17118737	-	intron:XM_024436972.1/XM_024436969.1
202rev	TCTCTGCAACCTCTGGAACGCGG	TCTCTCCAACTTCTGGGAAGTGG	.....*....*.....*.*.	4	0.0612105	0.0158665	NC_037128.1	7441459	7441481	-	intergenic:XM_024396580.1/XM_024396579.1/XM_024396578.1/XM_024396577.1-XM_024396582.1/XM_024396581.1
202rev	TCTCTGCAACCTCTGGAACGCGG	TCTCTCCAACTTCTGGGAAGTGG	.....*....*.....*.*.	4	0.0612105	0.0158665	NC_037104.1	51144708	51144730	-	intergenic:XM_024429971.1-XM_024429975.1/XM_024429973.1/XM_024429972.1
202rev	TCTCTGCAACCTCTGGAACGCGG	TCTCTCCAACTTCTGGGAAGTGG	.....*....*.....*.*.	4	0.0612105	0.0158665	NC_037124.1	39401767	39401789	+	intergenic:LOC112226423-XM_024392171.1
202rev	TCTCTGCAACCTCTGGAACGCGG	TCTCTGCTACCTATGGCAAGCGG	.......*....*...*.*.	4	0.0671487	0.0124665	NC_037115.1	37961491	37961513	+	intergenic:LOC112218994-XM_024379770.1/XM_024379769.1
202rev	TCTCTGCAACCTCTGGAACGCGG	TCTCTGCAACTTCTGGGGTGAGG	..........*.....***.	4	0.0180067	0.0100244	NC_037109.1	60100895	60100917	-	exon:XM_024442974.1/XM_024442972.1/XM_024442971.1/XM_024442970.1/XM_024442969.1/XM_024442968.1
202rev	TCTCTGCAACCTCTGGAACGCGG	TGTCAGCAACCTCTGGTCCGCGG	.*..*...........**..	4	0.119478	0.00883368	NW_020129253.1	106709	106731	+	intron:LOC112237480
202rev	TCTCTGCAACCTCTGGAACGCGG	TCTGTGAAACCTCTGGGAGGAGG	...*..*.........*.*.	4	0.131149	0.00827206	NC_037129.1	27318918	27318940	+	exon:XM_024397828.1/XM_024397827.1
202rev	TCTCTGCAACCTCTGGAACGCGG	TCTCTGAAACCTCTGGTCAGAGG	......*.........***.	4	0.0244036	0.00816327	NC_037101.1	39270195	39270217	-	intergenic:XM_024420741.1-XR_002953707.1
202rev	TCTCTGCAACCTCTGGAACGCGG	TCTCTGAAACCTCTGGTCAGAGG	......*.........***.	4	0.0244036	0.00816327	NW_020142510.1	10448543	10448565	-	intergenic:XM_024413555.1-XR_002952709.1
202rev	TCTCTGCAACCTCTGGAACGCGG	TATCTGCCACCTCTGGTCCGGGG	.*.....*........**..	4	0.119478	0.00791589	NC_037098.1	19623729	19623751	-	intron:LOC112267746
202rev	TCTCTGCAACCTCTGGAACGCGG	TCTCGGCAAGGTCTGGAAGGCGG	....*....**.......*.	4	0.24203	0.00777778	NC_037103.1	18965821	18965843	-	intergenic:XM_024428233.1-XM_024428234.1
202rev	TCTCTGCAACCTCTGGAACGCGG	TCTCTGCAACTTCCGGCGCGAGG	..........*..*..**..	4	0.00851747	0.00620556	NW_020130061.1	30120	30142	-	intron:XM_024407988.1
202rev	TCTCTGCAACCTCTGGAACGCGG	TCTCTGCAGGCTCTGGGAGGAGG	........**......*.*.	4	0.09764	0.00571895	NC_037097.1	44559403	44559425	+	intergenic:XM_024422529.1/XM_024422524.1-XM_024422520.1/XM_024422515.1
202rev	TCTCTGCAACCTCTGGAACGCGG	TCTCTGCAACCTCTTGTTCCTGG	..............*.**.*	4	0.0110047	0.00408163	NC_037125.1	3773409	3773431	+	intergenic:XR_002949891.1-XM_024392281.1
202rev	TCTCTGCAACCTCTGGAACGCGG	TCTCTGCCACCTGTGGAGGGAGG	.......*....*....**.	4	0.0341848	0.00292208	NC_037125.1	25455305	25455327	+	exon:XM_024393089.1/XM_024393088.1/XM_024393087.1/XM_024393086.1/XM_024393085.1/XM_024393084.1/XM_024393083.1/XM_024393081.1/XM_024393080.1/XM_024393079.1/XM_024393078.1/XM_024393077.1
202rev	TCTCTGCAACCTCTGGAACGCGG	TCTCTGCTGTCTCTGCAACGGGG	.......***.....*....	4	0.132112	0	NC_037101.1	10115319	10115341	+	intron:XM_024419822.1/XM_024419820.1/XM_024419819.1/XM_024419818.1/XM_024419817.1
202rev	TCTCTGCAACCTCTGGAACGCGG	TATCTGCAACATCTGTGACGTGG	.*........*....**...	4	0.0581908	0	NC_037111.1	10735244	10735266	+	intron:XM_024372990.1
202rev	TCTCTGCAACCTCTGGAACGCGG	TCTCTGAAACCTTTGTAATGTGG	......*.....*..*..*.	4	0.0215267	0	NC_037106.1	55935077	55935099	+	intergenic:XR_002955066.1-XM_024434268.1
202rev	TCTCTGCAACCTCTGGAACGCGG	TCTCTGCATTCTCTGCAATGCGG	........**.....*..*.	4	0.043621	0	NC_037109.1	46287935	46287957	-	exon:XM_024442420.1
202rev	TCTCTGCAACCTCTGGAACGCGG	TCTGTGCAACCACTGCAAAGGGG	...*.......*...*..*.	4	0.0422062	0	NC_037104.1	40652841	40652863	-	intergenic:XM_024429729.1-XM_024429730.1
202rev	TCTCTGCAACCTCTGGAACGCGG	CCTCCGCAACCTCTCCAACGTGG	*...*.........**....	4	0.0729853	0	NC_037124.1	7348142	7348164	-	exon:LOC112226635
202rev	TCTCTGCAACCTCTGGAACGCGG	CCTCCGCAACCTCTCCAACGTGG	*...*.........**....	4	0.0729853	0	NC_037124.1	8510144	8510166	-	exon:LOC112226665
202rev	TCTCTGCAACCTCTGGAACGCGG	TCTCTACAATCTCTGGAAAGAGG	.....*...*........*.	3	0.521889	0.403361	NC_037102.1	3768056	3768078	+	intergenic:XR_002953790.1-XR_002953789.1
202rev	TCTCTGCAACCTCTGGAACGCGG	TTTCTTCATCCTCTGGAACGAGG	.*...*..*...........	3	0.94022	0.363636	NC_037122.1	28978655	28978677	+	intergenic:XM_024389522.1-XM_024388600.1
202rev	TCTCTGCAACCTCTGGAACGCGG	CCTCTGCAACCTATGGAAAGTGG	*...........*.....*.	3	0.436195	0.141287	NC_037109.1	3342596	3342618	-	intergenic:XM_024443348.1-XM_024443400.1
202rev	TCTCTGCAACCTCTGGAACGCGG	TCGCTGCAAGCTCTGGACCGCGG	..*......*.......*..	3	0.560827	0.037037	NC_037115.1	13744228	13744250	+	intron:XM_024379102.1
202rev	TCTCTGCAACCTCTGGAACGCGG	TCTCTCCAACCTCTGGCCCGAGG	.....*..........**..	3	0.135745	0.0229183	NW_020130579.1	44332	44354	-	intron:XM_024408698.1
202rev	TCTCTGCAACCTCTGGAACGCGG	TCTCTGCAACCTCTGCAAGTCGG	...............*..**	3	0.0548235	0	NW_020129611.1	22989	23011	-	intergenic:Gap-XR_002951650.1
202rev	TCTCTGCAACCTCTGGAACGCGG	TCTCTGCAACCTCTGCAAGTCGG	...............*..**	3	0.0548235	0	NW_020131032.1	79934	79956	+	intergenic:LOC112240980-XM_024409178.1
209rev	AGGATCCTCTCTGCAACCTCTGG	AGGATCTACTATGTAACCTCAGG	......**..*..*......	4	0.0770929	0.3575	NC_037105.1	4692130	4692152	-	intron:XM_024434189.1
209rev	AGGATCCTCTCTGCAACCTCTGG	AGGATCTACTATGTAACCTCAGG	......**..*..*......	4	0.0770929	0.3575	NC_037105.1	4692191	4692213	-	intron:XM_024434189.1
209rev	AGGATCCTCTCTGCAACCTCTGG	AGGATCTACTATGTAACCTCAGG	......**..*..*......	4	0.0770929	0.3575	NC_037105.1	4692069	4692091	-	intron:XM_024434189.1
209rev	AGGATCCTCTCTGCAACCTCTGG	AGGATCTACTATGTAACCTCAGG	......**..*..*......	4	0.0770929	0.3575	NC_037105.1	4692211	4692233	-	intron:XM_024434189.1
209rev	AGGATCCTCTCTGCAACCTCTGG	CGGATCCTTACTGCAAACTCTGG	*.......**......*...	4	0.343031	0.3	NC_037098.1	14739347	14739369	-	intergenic:XR_002956025.1-XM_024444944.1/XM_024444940.1
209rev	AGGATCCTCTCTGCAACCTCTGG	TGGATCCTTTCTGTAAACTCTGG	*.......*....*..*...	4	0.0554959	0.299444	NC_037115.1	794869	794891	+	intergenic:XM_024378753.1/XM_024378752.1-XM_024378752.1/XM_024378753.1
209rev	AGGATCCTCTCTGCAACCTCTGG	GGAATCCTCTCCCCAACCTCAGG	*.*........**.......	4	0.282202	0.299169	NC_037099.1	2113116	2113138	+	intergenic:XM_024389404.1/XM_024389421.1/XM_024389414.1-XM_024411616.1
209rev	AGGATCCTCTCTGCAACCTCTGG	CGGATCCTTGCTGTAACCTCTGG	*.......**...*......	4	0.126036	0.275	NW_020128814.1	5243126	5243148	-	intergenic:XM_024401062.1/XM_024401059.1/XM_024401058.1/XM_024401057.1/XM_024401056.1/XM_024401055.1/XM_024401054.1/XM_024401052.1/XM_024401051.1/XM_024401050.1/XM_024401060.1/XM_024401061.1-rna65612
209rev	AGGATCCTCTCTGCAACCTCTGG	CGGATCCTTGCTGTAACCTCTGG	*.......**...*......	4	0.126036	0.275	NC_037114.1	4813638	4813660	-	intergenic:XM_024377672.1/XM_024377669.1/XM_024377668.1/XM_024377667.1/XM_024377666.1/XM_024377665.1/XM_024377664.1/XM_024377663.1/XM_024377662.1/XM_024377661.1/XM_024377670.1/XM_024377671.1-rna42215
209rev	AGGATCCTCTCTGCAACCTCTGG	AGTAGCTCCTCTGCAACCTCAGG	..*.*.**............	4	0.8788	0.26	NC_037125.1	34298608	34298630	+	intergenic:XM_024393205.1/XM_024393204.1/XM_024393203.1/XM_024393201.1/XM_024393206.1-XR_002949960.1/XR_002949959.1
209rev	AGGATCCTCTCTGCAACCTCTGG	AGTAGCTCCTCTGCAACCTCAGG	..*.*.**............	4	0.8788	0.26	NW_020142547.1	368923	368945	-	intergenic:XR_002952976.1/XR_002952975.1-XM_024415311.1/XM_024415310.1/XM_024415309.1/XM_024415308.1/XM_024415312.1
209rev	AGGATCCTCTCTGCAACCTCTGG	AGAGTGCCCTCTGCAACCTCAGG	..**.*.*............	4	0.778439	0.234375	NW_020128862.1	962702	962724	-	intergenic:LOC112235102-XM_024403486.1
209rev	AGGATCCTCTCTGCAACCTCTGG	AAGTTCCTCTCCCCAACCTCAGG	.*.*.......**.......	4	0.272415	0.214788	NC_037099.1	2110213	2110235	+	intergenic:XM_024389404.1/XM_024389421.1/XM_024389414.1-XM_024411616.1
209rev	AGGATCCTCTCTGCAACCTCTGG	AGGGTACTCTCTGTAACCTACGG	...*.*.......*.....*	4	0.0595182	0.212798	NW_020130284.1	87209	87231	-	intergenic:XM_024408362.1-XR_002951939.1
209rev	AGGATCCTCTCTGCAACCTCTGG	CGGCTCCAATCTGCAACCTCGGG	*..*...**...........	4	0.83398	0.207443	NC_037098.1	382262	382284	+	exon:XM_024439590.1
209rev	AGGATCCTCTCTGCAACCTCTGG	AAGACCCACTCTTCAACCTCAGG	.*..*..*....*.......	4	0.55369	0.203077	NC_037113.1	12303676	12303698	+	intergenic:XM_024377015.1-XM_024377016.1
209rev	AGGATCCTCTCTGCAACCTCTGG	GGGATCCTCACTGAAACTTCTGG	*........*...*...*..	4	0.0425867	0.192857	NC_037123.1	14192905	14192927	-	intron:LOC112225764
209rev	AGGATCCTCTCTGCAACCTCTGG	ACGTTCCTCTCCCCAACCTCAGG	.*.*.......**.......	4	0.272415	0.175736	NC_037099.1	2113364	2113386	+	intergenic:XM_024389404.1/XM_024389421.1/XM_024389414.1-XM_024411616.1
209rev	AGGATCCTCTCTGCAACCTCTGG	CGGATCCTTGCTGCAAACTCTGG	*.......**......*...	4	0.343031	0.175	NC_037104.1	10131685	10131707	+	intergenic:XM_024430612.1-XM_024430613.1
209rev	AGGATCCTCTCTGCAACCTCTGG	AAGTTGCTCTCTGCGACCTCCGG	.*.*.*........*.....	4	0.243723	0.175	NC_037106.1	37734862	37734884	-	intron:XM_024434225.1
209rev	AGGATCCTCTCTGCAACCTCTGG	AAGATCCTCACTGAAACTTCTGG	.*.......*...*...*..	4	0.0425867	0.163187	NC_037105.1	58834989	58835011	+	intron:LOC112258219
209rev	AGGATCCTCTCTGCAACCTCTGG	AAGATCCTCACTGAAACTTCTGG	.*.......*...*...*..	4	0.0425867	0.163187	NC_037105.1	46608756	46608778	+	intron:LOC112258079
209rev	AGGATCCTCTCTGCAACCTCTGG	AAGATCCTCACTGAAACTTCTGG	.*.......*...*...*..	4	0.0425867	0.163187	NW_020129908.1	76664	76686	+	intron:XR_002951780.1
209rev	AGGATCCTCTCTGCAACCTCTGG	AAGATCCTCACTGAAACTTCTGG	.*.......*...*...*..	4	0.0425867	0.163187	NW_020128836.1	124247	124269	+	intergenic:XM_024402693.1-XM_024402694.1
209rev	AGGATCCTCTCTGCAACCTCTGG	AACAACCCCTCTGCAACCTCAGG	.**.*..*............	4	1.34583	0.162722	NC_037100.1	10642132	10642154	-	intergenic:XM_024419287.1-XM_024419288.1
209rev	AGGATCCTCTCTGCAACCTCTGG	AACAACCCCTCTGCAACCTCAGG	.**.*..*............	4	1.34583	0.162722	NC_037100.1	14977890	14977912	-	intergenic:XM_024417048.1/XM_024417046.1/XM_024417049.1/XM_024417047.1-XM_024417050.1/XR_002953200.1/XM_024417051.1
209rev	AGGATCCTCTCTGCAACCTCTGG	AGGACACACTCTGCAGCCTCGGG	....**.*.......*....	4	0.148881	0.142857	NW_020142502.1	2120262	2120284	+	intergenic:XM_024412820.1-XM_024412863.1
209rev	AGGATCCTCTCTGCAACCTCTGG	AGGAGCCATTCTTCAACCTCAGG	....*..**...*.......	4	0.32275	0.1344	NC_037097.1	13981443	13981465	+	intron:XM_024435820.1
209rev	AGGATCCTCTCTGCAACCTCTGG	AAGCTCCTCTCCCCAACCTCAGG	.*.*.......**.......	4	0.272415	0.119126	NC_037099.1	2111073	2111095	+	intergenic:XM_024389404.1/XM_024389421.1/XM_024389414.1-XM_024411616.1
209rev	AGGATCCTCTCTGCAACCTCTGG	TGGACCCTCTCTCCCACCTCTGG	*...*.......*.*.....	4	0.155902	0.114833	NC_037111.1	8126083	8126105	-	exon:XM_024374041.1
209rev	AGGATCCTCTCTGCAACCTCTGG	TGGACCCTCTCTCCCACCTCTGG	*...*.......*.*.....	4	0.155902	0.114833	NC_037113.1	13456594	13456616	+	intergenic:XM_024377463.1-XM_024377032.1
209rev	AGGATCCTCTCTGCAACCTCTGG	AGAATCCTCTCTCTAATCTCTGG	..*.........**..*...	4	0.0329034	0.10807	NW_020129133.1	140536	140558	+	intron:XM_024405597.1
209rev	AGGATCCTCTCTGCAACCTCTGG	AGAATCCTCTCTCTAATCTCTGG	..*.........**..*...	4	0.0329034	0.10807	NC_037108.1	74881035	74881057	+	intron:XM_024440500.1
209rev	AGGATCCTCTCTGCAACCTCTGG	AGAATCCTCTCTCTAATCTCTGG	..*.........**..*...	4	0.0329034	0.10807	NW_020130123.1	36663	36685	+	intron:LOC112239653
209rev	AGGATCCTCTCTGCAACCTCTGG	AGAATCCTCTCTCTAATCTCTGG	..*.........**..*...	4	0.0329034	0.10807	NW_020130123.1	36573	36595	+	intron:LOC112239653
209rev	AGGATCCTCTCTGCAACCTCTGG	AGAATCCTCTCTCTAATCTCTGG	..*.........**..*...	4	0.0329034	0.10807	NW_020130123.1	36693	36715	+	intron:LOC112239653
209rev	AGGATCCTCTCTGCAACCTCTGG	AGAATCCTCTCTCTAATCTCTGG	..*.........**..*...	4	0.0329034	0.10807	NW_020130123.1	36633	36655	+	intron:LOC112239653
209rev	AGGATCCTCTCTGCAACCTCTGG	AGAATCCTCTCTCTAATCTCTGG	..*.........**..*...	4	0.0329034	0.10807	NW_020130123.1	36603	36625	+	intron:LOC112239653
209rev	AGGATCCTCTCTGCAACCTCTGG	AGAAGCATCTCTTCAACCTCAGG	..*.*.*.....*.......	4	0.372876	0.108	NC_037103.1	29208734	29208756	+	intergenic:XM_024426354.1-XM_024426355.1
209rev	AGGATCCTCTCTGCAACCTCTGG	ATGGTACTCTCTGCCACCTCAGG	.*.*.*........*.....	4	0.243723	0.100723	NW_020130071.1	74347	74369	+	intergenic:LOC112239561-XM_024408005.1
209rev	AGGATCCTCTCTGCAACCTCTGG	AGCATCCACTCGGCAACTTCAGG	..*....*...*.....*..	4	0.150546	0.0989011	NC_037097.1	13044041	13044063	-	intergenic:XM_024435579.1-XM_024395437.1
209rev	AGGATCCTCTCTGCAACCTCTGG	AGGCTACCCTCTTCAACCTCAGG	...*.*.*....*.......	4	0.334982	0.0983193	NW_020142577.1	193455	193477	-	intergenic:XM_024415788.1-XM_024415795.1/XM_024415794.1/XM_024415800.1/XM_024415798.1/XM_024415797.1/XM_024415796.1
209rev	AGGATCCTCTCTGCAACCTCTGG	AGGCTACCCTCTTCAACCTCAGG	...*.*.*....*.......	4	0.334982	0.0983193	NW_020132205.1	211662	211684	-	intergenic:XM_024409946.1-Gap
209rev	AGGATCCTCTCTGCAACCTCTGG	AACATCCCCTCTTCAACCTCAGG	.**....*....*.......	4	0.545938	0.0976331	NW_020142705.1	7434	7456	+	intron:LOC112247836
209rev	AGGATCCTCTCTGCAACCTCTGG	AACATCCCCTCTTCAACCTCAGG	.**....*....*.......	4	0.545938	0.0976331	NC_037107.1	8458733	8458755	-	intergenic:XM_024437960.1/XM_024437961.1-XM_024437962.1
209rev	AGGATCCTCTCTGCAACCTCTGG	AGCTTCCTCTCCCCAACCTCAGG	..**.......**.......	4	0.268602	0.0976309	NC_037099.1	2112268	2112290	+	intergenic:XM_024389404.1/XM_024389421.1/XM_024389414.1-XM_024411616.1
209rev	AGGATCCTCTCTGCAACCTCTGG	AGCTTCCTCTCCCCAACCTCAGG	..**.......**.......	4	0.268602	0.0976309	NC_037099.1	2110315	2110337	+	intergenic:XM_024389404.1/XM_024389421.1/XM_024389414.1-XM_024411616.1
209rev	AGGATCCTCTCTGCAACCTCTGG	AGGAACTTCTCTCCAACATCAGG	....*.*.....*....*..	4	0.0778743	0.0921053	NC_037104.1	15044781	15044803	-	intergenic:XM_024429055.1-XM_024429057.1
209rev	AGGATCCTCTCTGCAACCTCTGG	AGGAACTTCTCTCCAACATCAGG	....*.*.....*....*..	4	0.0778743	0.0921053	NC_037104.1	15035899	15035921	+	intergenic:XM_024429055.1-XM_024429057.1
209rev	AGGATCCTCTCTGCAACCTCTGG	AGGAGCGCCTCTTCAACCTCAGG	....*.**....*.......	4	0.360783	0.0903529	NW_020129104.1	222373	222395	+	intron:XM_024405405.1
209rev	AGGATCCTCTCTGCAACCTCTGG	AGGAGCGCCTCTTCAACCTCAGG	....*.**....*.......	4	0.360783	0.0903529	NC_037105.1	42609857	42609879	+	intron:XM_024432103.1
209rev	AGGATCCTCTCTGCAACCTCTGG	AGGAGCGCCTCTTCAACCTCAGG	....*.**....*.......	4	0.360783	0.0903529	NC_037104.1	48647194	48647216	+	intron:XM_024429892.1
209rev	AGGATCCTCTCTGCAACCTCTGG	AGGAGCGCCTCTTCAACCTCAGG	....*.**....*.......	4	0.360783	0.0903529	NC_037108.1	27735552	27735574	+	intron:XM_024438908.1/XM_024438907.1
209rev	AGGATCCTCTCTGCAACCTCTGG	AGGAGCGCCTCTTCAACCTCAGG	....*.**....*.......	4	0.360783	0.0903529	NC_037111.1	24363529	24363551	+	intergenic:XM_024373507.1/XM_024373506.1/XM_024373505.1/XM_024373504.1-XM_024373507.1/XM_024373506.1/XM_024373505.1
209rev	AGGATCCTCTCTGCAACCTCTGG	AGGAGCGCCTCTTCAACCTCAGG	....*.**....*.......	4	0.360783	0.0903529	NC_037105.1	25094545	25094567	+	intergenic:XR_002954634.1-LOC112257733
209rev	AGGATCCTCTCTGCAACCTCTGG	AGGAGCGCCTCTTCAACCTCAGG	....*.**....*.......	4	0.360783	0.0903529	NW_020129725.1	28544	28566	-	intron:LOC112238825
209rev	AGGATCCTCTCTGCAACCTCTGG	AGGAGCGCCTCTTCAACCTCAGG	....*.**....*.......	4	0.360783	0.0903529	NC_037105.1	54836090	54836112	+	intron:XM_024432371.1
209rev	AGGATCCTCTCTGCAACCTCTGG	AGGAGCGCCTCTTCAACCTCAGG	....*.**....*.......	4	0.360783	0.0903529	NC_037108.1	67175093	67175115	-	intron:XM_024440765.1
209rev	AGGATCCTCTCTGCAACCTCTGG	AGGAGCGCCTCTTCAACCTCAGG	....*.**....*.......	4	0.360783	0.0903529	NC_037110.1	42476252	42476274	+	intergenic:XR_002956059.1/XM_024445401.1/XM_024445400.1-LOC112267437
209rev	AGGATCCTCTCTGCAACCTCTGG	AGGAGCGCCTCTTCAACCTCAGG	....*.**....*.......	4	0.360783	0.0903529	NC_037102.1	42146718	42146740	+	intergenic:XR_002953872.1-XM_024424094.1
209rev	AGGATCCTCTCTGCAACCTCTGG	AGGAGCGCCTCTTCAACCTCAGG	....*.**....*.......	4	0.360783	0.0903529	NC_037102.1	76126578	76126600	-	intron:XM_024425514.1
209rev	AGGATCCTCTCTGCAACCTCTGG	AGGAGCGCCTCTTCAACCTCAGG	....*.**....*.......	4	0.360783	0.0903529	NC_037106.1	49525235	49525257	+	intergenic:XM_024435920.1-XM_024435921.1
209rev	AGGATCCTCTCTGCAACCTCTGG	AGGAGCGCCTCTTCAACCTCAGG	....*.**....*.......	4	0.360783	0.0903529	NC_037100.1	52418989	52419011	-	intergenic:XM_024418426.1-XM_024418428.1
209rev	AGGATCCTCTCTGCAACCTCTGG	ATGATCGCCTCTTCAACCTCAGG	.*....**....*.......	4	0.37817	0.0898396	NC_037124.1	6750748	6750770	-	intron:XM_024391039.1
209rev	AGGATCCTCTCTGCAACCTCTGG	ATGATCGCCTCTTCAACCTCAGG	.*....**....*.......	4	0.37817	0.0898396	NC_037124.1	7912750	7912772	-	intron:XM_024391107.1
209rev	AGGATCCTCTCTGCAACCTCTGG	ATGATCCTTTTGGCAACCTCGGG	.*......*.**........	4	0.238701	0.0856643	NC_037098.1	8150809	8150831	+	intergenic:XM_024442376.1/XM_024442368.1-XM_024442390.1/XM_024442399.1
209rev	AGGATCCTCTCTGCAACCTCTGG	AGTGCCCTCTCTGCCACCTCTGG	..***.........*.....	4	0.397208	0.0852273	NC_037104.1	51528620	51528642	+	intergenic:XM_024430001.1/XM_024430000.1/XM_024429999.1/XM_024429998.1-XM_024428600.1
209rev	AGGATCCTCTCTGCAACCTCTGG	ACGATGCTCTTAGCAACCTCTGG	.*...*....**........	4	0.236357	0.0852071	NC_037129.1	12551627	12551649	-	intergenic:XM_024396787.1-XM_024396835.1/XM_024396834.1
209rev	AGGATCCTCTCTGCAACCTCTGG	ATGGACCTCTCTCCAACCTCTGG	.*.**.......*.......	4	0.55369	0.0837321	NC_037104.1	41761837	41761859	+	intergenic:XM_024429752.1/XM_024429751.1/XM_024429750.1/XM_024429748.1/XM_024429744.1/XM_024429747.1/XM_024429746.1/XM_024429745.1/XM_024429742.1-XM_024429753.1
209rev	AGGATCCTCTCTGCAACCTCTGG	ATGAAACTCTCTGCAACCCCAGG	.*..**............*.	4	0.301744	0.0815047	NC_037115.1	51205126	51205148	+	intron:LOC112219050
209rev	AGGATCCTCTCTGCAACCTCTGG	ATGAGCCTCTCTGTCACCTCGGG	.*..*........**.....	4	0.0600244	0.0814545	NC_037104.1	41361882	41361904	+	intron:XM_024429738.1
209rev	AGGATCCTCTCTGCAACCTCTGG	ATGAAACTCTCTGCCACCTCAGG	.*..**........*.....	4	0.243723	0.0805785	NC_037129.1	4711185	4711207	+	intergenic:XM_024397082.1/XM_024397081.1/XM_024397080.1/XM_024397079.1/XM_024397078.1-XM_024397089.1
209rev	AGGATCCTCTCTGCAACCTCTGG	TGGATCCTCACTGCAGACTCCGG	*........*.....**...	4	0.0965653	0.0769231	NW_020142529.1	763086	763108	+	intergenic:XM_024414554.1-XM_024414555.1
209rev	AGGATCCTCTCTGCAACCTCTGG	TGGATCCTCACTGCAGTCTCCGG	*........*.....**...	4	0.0965653	0.0769231	NC_037105.1	23002732	23002754	-	intergenic:XM_024431423.1-XM_024431424.1
209rev	AGGATCCTCTCTGCAACCTCTGG	TGGATCCTCACTGCAGTCTCCGG	*........*.....**...	4	0.0965653	0.0769231	NC_037115.1	14091384	14091406	-	intergenic:XM_024379106.1-XM_024379108.1/XM_024379107.1
209rev	AGGATCCTCTCTGCAACCTCTGG	AGCAGCCCCTCTTCAACCTCAGG	..*.*..*....*.......	4	0.545938	0.0738462	NC_037110.1	42586499	42586521	-	intergenic:XM_024445806.1-XM_024445405.1
209rev	AGGATCCTCTCTGCAACCTCTGG	AGCAGCCCCTCTTCAACCTCAGG	..*.*..*....*.......	4	0.545938	0.0738462	NC_037129.1	6551944	6551966	-	intergenic:XM_024397156.1/XM_024397155.1-XM_024398239.1
209rev	AGGATCCTCTCTGCAACCTCTGG	AGCAGCCCCTCTTCAACCTCAGG	..*.*..*....*.......	4	0.545938	0.0738462	NC_037103.1	71716490	71716512	+	intron:XR_002954216.1/XR_002954215.1/XM_024427882.1
209rev	AGGATCCTCTCTGCAACCTCTGG	AGCAGCCCCTCTTCAACCTCCGG	..*.*..*....*.......	4	0.545938	0.0738462	NW_020129007.1	201212	201234	+	intron:XM_024404863.1
209rev	AGGATCCTCTCTGCAACCTCTGG	AGCAGCCCCTCTTCAACCTCAGG	..*.*..*....*.......	4	0.545938	0.0738462	NC_037121.1	12454604	12454626	-	intron:XM_024387700.1/XM_024387699.1
209rev	AGGATCCTCTCTGCAACCTCTGG	AGCAGCCCCTCTTCAACCTCAGG	..*.*..*....*.......	4	0.545938	0.0738462	NC_037115.1	9277708	9277730	+	intergenic:XM_024378962.1-XM_024380390.1
209rev	AGGATCCTCTCTGCAACCTCTGG	AGCAGCCCCTCTTCAACCTCAGG	..*.*..*....*.......	4	0.545938	0.0738462	NC_037098.1	13521026	13521048	-	intron:XM_024385327.1
209rev	AGGATCCTCTCTGCAACCTCTGG	AGCAGCCCCTCTTCAACCTCAGG	..*.*..*....*.......	4	0.545938	0.0738462	NC_037106.1	49413762	49413784	+	intron:XM_024434247.1
209rev	AGGATCCTCTCTGCAACCTCTGG	AGCAGCCCCTCTTCAACCTCAGG	..*.*..*....*.......	4	0.545938	0.0738462	NC_037107.1	36588861	36588883	+	intergenic:XM_024437652.1-XM_024437647.1
209rev	AGGATCCTCTCTGCAACCTCTGG	AGCAGCCCCTCTTCAACCTCAGG	..*.*..*....*.......	4	0.545938	0.0738462	NC_037103.1	83515512	83515534	-	intergenic:XM_024428140.1-XM_024428144.1/XM_024428142.1/XM_024428143.1
209rev	AGGATCCTCTCTGCAACCTCTGG	AGCAGCCCCTCTTCAACCTCGGG	..*.*..*....*.......	4	0.545938	0.0738462	NC_037118.1	7114640	7114662	-	intergenic:XM_024383860.1/XM_024383859.1/XM_024383858.1-XM_024383861.1
209rev	AGGATCCTCTCTGCAACCTCTGG	AGCAGCCCCTCTTCAACCTCAGG	..*.*..*....*.......	4	0.545938	0.0738462	NC_037106.1	54407522	54407544	+	intron:LOC112260816
209rev	AGGATCCTCTCTGCAACCTCTGG	AGCAGCCCCTCTTCAACCTCAGG	..*.*..*....*.......	4	0.545938	0.0738462	NC_037114.1	30972527	30972549	+	intergenic:XM_024378438.1-LOC112217987
209rev	AGGATCCTCTCTGCAACCTCTGG	AGCAGCCCCTCTTCAACCTCTGG	..*.*..*....*.......	4	0.545938	0.0738462	NC_037104.1	64893036	64893058	-	intron:XM_024430434.1
209rev	AGGATCCTCTCTGCAACCTCTGG	AGCAGCCCCTCTTCAACCTCAGG	..*.*..*....*.......	4	0.545938	0.0738462	NC_037129.1	31739343	31739365	-	intergenic:XM_024398098.1/XM_024398097.1/XR_002950437.1-XM_024398099.1
209rev	AGGATCCTCTCTGCAACCTCTGG	AGCAGCCCCTCTTCAACCTCAGG	..*.*..*....*.......	4	0.545938	0.0738462	NC_037118.1	23194419	23194441	-	intron:XM_024383674.1
209rev	AGGATCCTCTCTGCAACCTCTGG	AGCAGCCCCTCTTCAACCTCAGG	..*.*..*....*.......	4	0.545938	0.0738462	NW_020128847.1	325897	325919	-	intergenic:XM_024403107.1-XM_024403108.1
209rev	AGGATCCTCTCTGCAACCTCTGG	AGCAGCCCCTCTTCAACCTCAGG	..*.*..*....*.......	4	0.545938	0.0738462	NC_037127.1	4130765	4130787	-	intergenic:XR_002950171.1-XM_024395046.1
209rev	AGGATCCTCTCTGCAACCTCTGG	CGGATCCTCTGTGTAAACTCTGG	*.........*..*..*...	4	0.0504095	0.0733333	NC_037126.1	5270782	5270804	+	intron:XM_024393494.1/XM_024393493.1/XM_024393492.1/XM_024393491.1/XM_024393490.1
209rev	AGGATCCTCTCTGCAACCTCTGG	AGCGTCCCCTCTTCAACCTCAGG	..**...*....*.......	4	0.545938	0.0721154	NW_020129394.1	86875	86897	+	intergenic:LOC112238019-XM_024406611.1
209rev	AGGATCCTCTCTGCAACCTCTGG	ATGAACATCTCTTCAACCTCAGG	.*..*.*.....*.......	4	0.37817	0.0715909	NC_037099.1	35637394	35637416	-	intergenic:LOC112224021-XM_024402377.1/XM_024402371.1
209rev	AGGATCCTCTCTGCAACCTCTGG	AGTAACTTCTCTGAAACCTCTGG	..*.*.*......*......	4	0.143562	0.0710937	NW_020142510.1	10448550	10448572	-	intergenic:XM_024413555.1-XR_002952709.1
209rev	AGGATCCTCTCTGCAACCTCTGG	AGTAACTTCTCTGAAACCTCTGG	..*.*.*......*......	4	0.143562	0.0710937	NC_037101.1	39270202	39270224	-	intergenic:XM_024420741.1-XR_002953707.1
209rev	AGGATCCTCTCTGCAACCTCTGG	AGAAGCGTCTCTTCAACCTCAGG	..*.*.*.....*.......	4	0.372876	0.0677647	NC_037127.1	16701459	16701481	-	intergenic:XM_024395506.1/XM_024395507.1-XM_024395133.1
209rev	AGGATCCTCTCTGCAACCTCTGG	AGCATCCGTTCTGCCACCTCTGG	..*....**.....*.....	4	0.242694	0.0673077	NC_037102.1	75989953	75989975	+	intron:XR_002953954.1
209rev	AGGATCCTCTCTGCAACCTCTGG	ATGGTCTTCTCTGCTACCTCAGG	.*.*..*.......*.....	4	0.275145	0.0646307	NC_037104.1	14637743	14637765	-	intron:XR_002954368.1/XM_024429048.1/XM_024429047.1/XM_024429045.1/XM_024429044.1/XM_024429043.1/XM_024429042.1/XM_024429041.1/XM_024429040.1
209rev	AGGATCCTCTCTGCAACCTCTGG	AACAGCCTCTCTTCAACCTCAGG	.**.*.......*.......	4	0.545938	0.0624852	NW_020142520.1	2676512	2676534	+	intergenic:XM_024414273.1-XR_002952844.1
209rev	AGGATCCTCTCTGCAACCTCTGG	CCCATCCTCTCTGCCACCTCAGG	***...........*.....	4	0.397208	0.0622454	NC_037103.1	66425629	66425651	-	exon:XM_024427672.1
209rev	AGGATCCTCTCTGCAACCTCTGG	AGCAGCTTCTCTTCAACCTCAGG	..*.*.*.....*.......	4	0.372876	0.06	NC_037105.1	33220056	33220078	+	intergenic:XM_024431817.1-XM_024431815.1
209rev	AGGATCCTCTCTGCAACCTCTGG	AGCAGCTTCTCTTCAACCTCAGG	..*.*.*.....*.......	4	0.372876	0.06	NC_037102.1	61519486	61519508	+	intron:XM_024424803.1
209rev	AGGATCCTCTCTGCAACCTCTGG	AGCAGCTTCTCTTCAACCTCAGG	..*.*.*.....*.......	4	0.372876	0.06	NC_037102.1	51831033	51831055	+	intergenic:XM_024424356.1/XM_024424355.1-XM_024424358.1
209rev	AGGATCCTCTCTGCAACCTCTGG	AGCAGCTTCTCTTCAACCTCAGG	..*.*.*.....*.......	4	0.372876	0.06	NC_037099.1	42283167	42283189	+	intergenic:XM_024403374.1/XM_024403365.1/XM_024403359.1/XM_024403350.1/XM_024403345.1/XR_002950981.1-XM_024403374.1/XM_024403365.1/XM_024403359.1/XM_024403345.1
209rev	AGGATCCTCTCTGCAACCTCTGG	AGCAGCTTCTCTTCAACCTCAGG	..*.*.*.....*.......	4	0.372876	0.06	NC_037103.1	53397943	53397965	+	intergenic:LOC112254496-XM_024427160.1
209rev	AGGATCCTCTCTGCAACCTCTGG	AGCAGCTTCTCTTCAACCTCAGG	..*.*.*.....*.......	4	0.372876	0.06	NC_037098.1	50811861	50811883	+	intergenic:XM_024438303.1-XM_024383454.1
209rev	AGGATCCTCTCTGCAACCTCTGG	AGCATGCCCTCTTCAACCTCAGG	..*..*.*....*.......	4	0.330293	0.0576923	NW_020142539.1	2527796	2527818	-	intergenic:XM_024414954.1-XM_024415010.1/XM_024415009.1
209rev	AGGATCCTCTCTGCAACCTCTGG	AGCATGCCCTCTTCAACCTCAGG	..*..*.*....*.......	4	0.330293	0.0576923	NC_037099.1	24403202	24403224	-	intergenic:XM_024387212.1-XM_024399065.1/XM_024399056.1
209rev	AGGATCCTCTCTGCAACCTCTGG	AGCATGCCCTCTTCAACCTCAGG	..*..*.*....*.......	4	0.330293	0.0576923	NC_037099.1	31511422	31511444	+	intron:XR_002952704.1
209rev	AGGATCCTCTCTGCAACCTCTGG	AGGCTCCACTCTGTCACCTCAGG	...*...*.....**.....	4	0.0571316	0.0564706	NC_037129.1	23791949	23791971	+	intergenic:XM_024397658.1/XM_024397657.1-XM_024396853.1
209rev	AGGATCCTCTCTGCAACCTCTGG	AGCAGCATCTCTTCAACCTCAGG	..*.*.*.....*.......	4	0.372876	0.0553846	NC_037107.1	14857891	14857913	-	intergenic:XM_024436841.1-XM_024436845.1/XM_024436844.1/XM_024436843.1/XM_024436842.1
209rev	AGGATCCTCTCTGCAACCTCTGG	AGCAGCATCTCTTCAACCTCGGG	..*.*.*.....*.......	4	0.372876	0.0553846	NC_037104.1	3846957	3846979	-	intron:XM_024430591.1
209rev	AGGATCCTCTCTGCAACCTCTGG	AGCAGCATCTCTTCAACCTCAGG	..*.*.*.....*.......	4	0.372876	0.0553846	NW_020129465.1	108053	108075	-	intergenic:XM_024406759.1-Gap
209rev	AGGATCCTCTCTGCAACCTCTGG	AGCAGCATCTCTTCAACCTCAGG	..*.*.*.....*.......	4	0.372876	0.0553846	NC_037108.1	53070593	53070615	+	intergenic:XM_024439724.1-XM_024440737.1
209rev	AGGATCCTCTCTGCAACCTCTGG	AGCAGCATCTCTTCAACCTCAGG	..*.*.*.....*.......	4	0.372876	0.0553846	NW_020128804.1	4450118	4450140	-	intergenic:XM_024398951.1-XM_024399244.1
209rev	AGGATCCTCTCTGCAACCTCTGG	AGCAGCATCTCTTCAACCTCAGG	..*.*.*.....*.......	4	0.372876	0.0553846	NC_037118.1	30198006	30198028	+	intergenic:XM_024385004.1-XM_024385005.1
209rev	AGGATCCTCTCTGCAACCTCTGG	AGCAGCATCTCTTCAACCTCAGG	..*.*.*.....*.......	4	0.372876	0.0553846	NW_020128819.1	59196	59218	+	intergenic:Gap-XM_024401520.1/XM_024401518.1/XM_024401522.1/XM_024401521.1
209rev	AGGATCCTCTCTGCAACCTCTGG	AGCAGCATCTCTTCAACCTCAGG	..*.*.*.....*.......	4	0.372876	0.0553846	NC_037116.1	15673494	15673516	-	intergenic:LOC112220220-XM_024381313.1
209rev	AGGATCCTCTCTGCAACCTCTGG	AGCAGCATCTCTTCAACCTCAGG	..*.*.*.....*.......	4	0.372876	0.0553846	NC_037129.1	15857401	15857423	-	intron:LOC112230516
209rev	AGGATCCTCTCTGCAACCTCTGG	AGCATCGCCTCTTCAACCTCAGG	..*...**....*.......	4	0.372876	0.0542986	NC_037115.1	20576195	20576217	-	intron:XM_024379212.1
209rev	AGGATCCTCTCTGCAACCTCTGG	AGCATCGCCTCTTCAACCTCAGG	..*...**....*.......	4	0.372876	0.0542986	NC_037116.1	34441409	34441431	+	intergenic:XM_024380720.1-XM_024381350.1
209rev	AGGATCCTCTCTGCAACCTCTGG	AGCATCGCCTCTTCAACCTCAGG	..*...**....*.......	4	0.372876	0.0542986	NC_037110.1	22533911	22533933	+	intergenic:XM_024444529.1-XM_024444530.1
209rev	AGGATCCTCTCTGCAACCTCTGG	AGCATCGCCTCTTCAACCTCAGG	..*...**....*.......	4	0.372876	0.0542986	NC_037117.1	26252953	26252975	-	intergenic:XM_024383262.1-XM_024382498.1
209rev	AGGATCCTCTCTGCAACCTCTGG	AGCATCGCCTCTTCAACCTCAGG	..*...**....*.......	4	0.372876	0.0542986	NC_037104.1	61376163	61376185	+	intergenic:XM_024430375.1/XM_024430374.1/XM_024430371.1/XM_024430373.1/XM_024430372.1-XM_024428617.1
209rev	AGGATCCTCTCTGCAACCTCTGG	AGCATCGCCTCTTCAACCTCAGG	..*...**....*.......	4	0.372876	0.0542986	NC_037112.1	25508045	25508067	-	intergenic:LOC112216524-XM_024376546.1
209rev	AGGATCCTCTCTGCAACCTCTGG	AGCATCGCCTCTTCAACCTCAGG	..*...**....*.......	4	0.372876	0.0542986	NC_037108.1	59364807	59364829	+	intergenic:XM_024439996.1-XM_024439991.1
209rev	AGGATCCTCTCTGCAACCTCTGG	AGCATCGCCTCTTCAACCTCAGG	..*...**....*.......	4	0.372876	0.0542986	NW_020129302.1	91582	91604	+	intergenic:XM_024406238.1-XR_002951460.1
209rev	AGGATCCTCTCTGCAACCTCTGG	AGCATCGCCTCTTCAACCTCAGG	..*...**....*.......	4	0.372876	0.0542986	NC_037117.1	34173965	34173987	-	intron:XM_024382434.1
209rev	AGGATCCTCTCTGCAACCTCTGG	AGCATCGCCTCTTCAACCTCAGG	..*...**....*.......	4	0.372876	0.0542986	NC_037108.1	4446785	4446807	-	intergenic:LOC112263902-XM_024440537.1
209rev	AGGATCCTCTCTGCAACCTCTGG	AGCATCGCCTCTTCAACCTCAGG	..*...**....*.......	4	0.372876	0.0542986	NC_037109.1	53982090	53982112	-	intron:XM_024442710.1
209rev	AGGATCCTCTCTGCAACCTCTGG	AGCATCGCCTCTTCAACCTCCGG	..*...**....*.......	4	0.372876	0.0542986	NW_020129848.1	57554	57576	+	intergenic:LOC112239102-XR_002951750.1
209rev	AGGATCCTCTCTGCAACCTCTGG	TGGCTCCACTCTGCAGCCTCTGG	*..*...*.......*....	4	0.272333	0.0542986	NC_037128.1	2645384	2645406	-	intergenic:XM_024396462.1-XM_024396464.1
209rev	AGGATCCTCTCTGCAACCTCTGG	AGCAGCCGCTCTTCAACCTCAGG	..*.*..*....*.......	4	0.545938	0.0541538	NC_037097.1	82231803	82231825	-	intergenic:XR_002954718.1-XM_024436488.1
209rev	AGGATCCTCTCTGCAACCTCTGG	AGCAGCCGCTCTTCAACCTCAGG	..*.*..*....*.......	4	0.545938	0.0541538	NC_037106.1	42330151	42330173	+	intron:XM_024435650.1/XM_024435649.1/XM_024435648.1
209rev	AGGATCCTCTCTGCAACCTCTGG	AGCAGCCGCTCTTCAACCTCAGG	..*.*..*....*.......	4	0.545938	0.0541538	NC_037103.1	72475267	72475289	+	intergenic:XM_024427928.1-XM_024427929.1
209rev	AGGATCCTCTCTGCAACCTCTGG	AGCAGCCGCTCTTCAACCTCAGG	..*.*..*....*.......	4	0.545938	0.0541538	NC_037099.1	74963143	74963165	+	intergenic:XR_002952549.1-XM_024410768.1
209rev	AGGATCCTCTCTGCAACCTCTGG	AGCAGCCGCTCTTCAACCTCAGG	..*.*..*....*.......	4	0.545938	0.0541538	NW_020142538.1	1239009	1239031	-	intergenic:XM_024414903.1-XR_002952937.1
209rev	AGGATCCTCTCTGCAACCTCTGG	AGCAGCCGCTCTTCAACCTCAGG	..*.*..*....*.......	4	0.545938	0.0541538	NC_037116.1	47319402	47319424	-	intergenic:XM_024381240.1/XM_024381238.1/XM_024381237.1/XM_024381236.1/XM_024381235.1-XM_024381242.1/XM_024381241.1
209rev	AGGATCCTCTCTGCAACCTCTGG	AGCAGCCGCTCTTCAACCTCAGG	..*.*..*....*.......	4	0.545938	0.0541538	NW_020129004.1	299409	299431	-	intergenic:XM_024404852.1-Gap
209rev	AGGATCCTCTCTGCAACCTCTGG	AGCAGCCGCTCTTCAACCTCAGG	..*.*..*....*.......	4	0.545938	0.0541538	NC_037110.1	44656054	44656076	+	intron:XM_024445458.1
209rev	AGGATCCTCTCTGCAACCTCTGG	AGCAGCCGCTCTTCAACCTCAGG	..*.*..*....*.......	4	0.545938	0.0541538	NW_020142514.1	1088128	1088150	-	intergenic:XM_024414137.1-XR_002952834.1
209rev	AGGATCCTCTCTGCAACCTCTGG	AGCAGCCGCTCTTCAACCTCAGG	..*.*..*....*.......	4	0.545938	0.0541538	NW_020129736.1	163587	163609	-	intergenic:LOC112238848-Gap
209rev	AGGATCCTCTCTGCAACCTCTGG	AGCAGCCGCTCTTCAACCTCAGG	..*.*..*....*.......	4	0.545938	0.0541538	NW_020128816.1	564380	564402	+	intergenic:XR_002950768.1-XM_024401203.1
209rev	AGGATCCTCTCTGCAACCTCTGG	AGCAGCCGCTCTTCAACCTCAGG	..*.*..*....*.......	4	0.545938	0.0541538	NC_037106.1	51156820	51156842	-	intron:XM_024435982.1/XM_024435981.1
209rev	AGGATCCTCTCTGCAACCTCTGG	AGCAGCCGCTCTTCAACCTCAGG	..*.*..*....*.......	4	0.545938	0.0541538	NC_037122.1	13108744	13108766	+	intergenic:XM_024388907.1-XR_002949544.1/XM_024388908.1/XM_024388906.1
209rev	AGGATCCTCTCTGCAACCTCTGG	AGGCTCCTCCCAGAAACCTCAGG	...*.....*.*.*......	4	0.0965976	0.0527059	NC_037102.1	55597421	55597443	-	intron:XM_024424514.1/XM_024424513.1/XM_024424512.1/XM_024424511.1
209rev	AGGATCCTCTCTGCAACCTCTGG	AGGCTCCTCCCAGAAACCTCAGG	...*.....*.*.*......	4	0.0965976	0.0527059	NC_037102.1	56437912	56437934	-	intron:XM_024424541.1
209rev	AGGATCCTCTCTGCAACCTCTGG	AGGCTCGCCTCTTCAACCTCAGG	...*..**....*.......	4	0.37817	0.049827	NC_037115.1	21944723	21944745	+	intron:XM_024379287.1
209rev	AGGATCCTCTCTGCAACCTCTGG	AGGATCATCACTGCCACCCCAGG	......*..*....*...*.	4	0.0798238	0.0483654	NC_037101.1	83059125	83059147	-	intergenic:XM_024422290.1/XM_024422289.1/XM_024422288.1/XM_024422287.1/XM_024422286.1-XM_024422290.1/XM_024422289.1/XM_024422287.1/XM_024422286.1
209rev	AGGATCCTCTCTGCAACCTCTGG	TGGATCTTCACTGCAAGCTCCGG	*.....*..*......*...	4	0.383454	0.0409664	NC_037100.1	8802026	8802048	+	intergenic:XM_024415903.1/XM_024415895.1/XM_024415888.1-XM_024415936.1
209rev	AGGATCCTCTCTGCAACCTCTGG	AGGAACCCCTCTTCCACCTCAGG	....*..*....*.*.....	4	0.148389	0.0409091	NW_020130013.1	30026	30048	-	intergenic:Gap-XM_024407911.1
209rev	AGGATCCTCTCTGCAACCTCTGG	AGGGTCCTCTCACCAGCCTCGGG	...*.......**..*....	4	0.0492279	0.0404858	NC_037119.1	13471489	13471511	-	intergenic:XM_024385905.1-XM_024385914.1/XM_024385918.1/XM_024385917.1/XM_024385916.1/XM_024385915.1/XM_024385913.1/XM_024385912.1/XM_024385911.1/XM_024385910.1/XM_024385909.1/XM_024385908.1/XM_024385907.1/XM_024385906.1/XM_024385904.1
209rev	AGGATCCTCTCTGCAACCTCTGG	AGGGTCCTCTCACCAGCCTCGGG	...*.......**..*....	4	0.0492279	0.0404858	NC_037099.1	16489137	16489159	-	intergenic:XM_024395943.1-XM_024395979.1
209rev	AGGATCCTCTCTGCAACCTCTGG	TGGATCATCACTGCAAGCTCCGG	*.....*..*......*...	4	0.383454	0.0378151	NC_037108.1	47672278	47672300	-	intergenic:XM_024439636.1-XM_024439638.1
209rev	AGGATCCTCTCTGCAACCTCTGG	TGGATCATCACTGCAAGCTCCGG	*.....*..*......*...	4	0.383454	0.0378151	NC_037125.1	29610690	29610712	-	intergenic:XM_024393149.1-XM_024392391.1
209rev	AGGATCCTCTCTGCAACCTCTGG	TGGATCATCACTGCAAGCTCCGG	*.....*..*......*...	4	0.383454	0.0378151	NC_037116.1	26696186	26696208	+	intergenic:XM_024381254.1-XM_024380432.1
209rev	AGGATCCTCTCTGCAACCTCTGG	AGCGTCCTCTCTCAAACCTCAGG	..**........**......	4	0.0813448	0.0354251	NC_037101.1	77260862	77260884	-	intergenic:XM_024422174.1/XM_024422173.1-XM_024422175.1
209rev	AGGATCCTCTCTGCAACCTCTGG	ATCATCCTCTTTGCAATCTCAGG	.**.......*.....*...	4	0.333582	0.0351443	NC_037104.1	40749624	40749646	+	intron:XM_024429730.1
209rev	AGGATCCTCTCTGCAACCTCTGG	AGCAGCGTCTCTTCAACCTCAGG	..*.*.*.....*.......	4	0.372876	0.0347511	NC_037116.1	34891439	34891461	+	intergenic:XM_024380740.1-XM_024380755.1/XM_024380759.1
209rev	AGGATCCTCTCTGCAACCTCTGG	AGCAGCGTCTCTTCAACCTCAGG	..*.*.*.....*.......	4	0.372876	0.0347511	NC_037099.1	73484893	73484915	-	intergenic:XM_024410621.1-XM_024388417.1
209rev	AGGATCCTCTCTGCAACCTCTGG	AGCAGCGTCTCTTCAACCTCAGG	..*.*.*.....*.......	4	0.372876	0.0347511	NC_037105.1	20063749	20063771	+	intergenic:XR_002954821.1/XR_002954820.1-XR_002954608.1
209rev	AGGATCCTCTCTGCAACCTCTGG	AGCAGCGTCTCTTCAACCTCGGG	..*.*.*.....*.......	4	0.372876	0.0347511	NC_037116.1	11345357	11345379	+	intron:XM_024381853.1/XM_024381407.1
209rev	AGGATCCTCTCTGCAACCTCTGG	AGCAGCGTCTCTTCAACCTCAGG	..*.*.*.....*.......	4	0.372876	0.0347511	NC_037120.1	282403	282425	+	intron:XM_024386243.1
209rev	AGGATCCTCTCTGCAACCTCTGG	AGCAGCGTCTCTTCAACCTCAGG	..*.*.*.....*.......	4	0.372876	0.0347511	NC_037098.1	31294704	31294726	+	intergenic:XR_002955297.1/XR_002955299.1-XM_024438615.1
209rev	AGGATCCTCTCTGCAACCTCTGG	AGCAGCGTCTCTTCAACCTCAGG	..*.*.*.....*.......	4	0.372876	0.0347511	NC_037103.1	50074642	50074664	+	intergenic:XM_024427029.1-XR_002954257.1
209rev	AGGATCCTCTCTGCAACCTCTGG	AGCAGCGTCTCTTCAACCTCAGG	..*.*.*.....*.......	4	0.372876	0.0347511	NC_037117.1	29740617	29740639	+	intergenic:XR_002948990.1-XM_024383366.1
209rev	AGGATCCTCTCTGCAACCTCTGG	AGCAGCGTCTCTTCAACCTCAGG	..*.*.*.....*.......	4	0.372876	0.0347511	NC_037114.1	114997	115019	-	intergenic:Gap-XM_024378642.1
209rev	AGGATCCTCTCTGCAACCTCTGG	AGCAGCGTCTCTTCAACCTCAGG	..*.*.*.....*.......	4	0.372876	0.0347511	NC_037105.1	30752021	30752043	+	intergenic:XM_024431738.1/XM_024431737.1-XM_024431739.1
209rev	AGGATCCTCTCTGCAACCTCTGG	AGCAGCGTCTCTTCAACCTCAGG	..*.*.*.....*.......	4	0.372876	0.0347511	NC_037129.1	26516746	26516768	-	intron:XM_024397786.1/XM_024397785.1/XM_024397784.1
209rev	AGGATCCTCTCTGCAACCTCTGG	AGCAGCGTCTCTTCAACCTCCGG	..*.*.*.....*.......	4	0.372876	0.0347511	NC_037127.1	16018264	16018286	-	intron:XM_024395490.1
209rev	AGGATCCTCTCTGCAACCTCTGG	AGCAGCGTCTCTTCAACCTCAGG	..*.*.*.....*.......	4	0.372876	0.0347511	NW_020142558.1	138140	138162	+	intergenic:Gap-XM_024415580.1
209rev	AGGATCCTCTCTGCAACCTCTGG	AGCAGCGTCTCTTCAACCTCAGG	..*.*.*.....*.......	4	0.372876	0.0347511	NW_020129169.1	227455	227477	+	intergenic:XR_002951355.1-XR_002951353.1
209rev	AGGATCCTCTCTGCAACCTCTGG	AGCAGCGTCTCTTCAACCTCAGG	..*.*.*.....*.......	4	0.372876	0.0347511	NW_020142558.1	1041851	1041873	+	intergenic:LOC112246940-XM_024415584.1
209rev	AGGATCCTCTCTGCAACCTCTGG	AGCAGCGTCTCTTCAACCTCAGG	..*.*.*.....*.......	4	0.372876	0.0347511	NC_037097.1	10936834	10936856	-	intergenic:XM_024391054.1-XM_024391171.1
209rev	AGGATCCTCTCTGCAACCTCTGG	AGCAGCGTCTCTTCAACCTCAGG	..*.*.*.....*.......	4	0.372876	0.0347511	NC_037119.1	3705398	3705420	-	intergenic:XM_024385521.1-LOC112222518
209rev	AGGATCCTCTCTGCAACCTCTGG	AGCAGCGTCTCTTCAACCTCAGG	..*.*.*.....*.......	4	0.372876	0.0347511	NC_037102.1	13452126	13452148	+	intergenic:XM_024425322.1-XM_024425323.1
209rev	AGGATCCTCTCTGCAACCTCTGG	AGCAGCGTCTCTTCAACCTCAGG	..*.*.*.....*.......	4	0.372876	0.0347511	NC_037103.1	60298930	60298952	-	intergenic:XM_024427378.1/XM_024427377.1-LOC112255283
209rev	AGGATCCTCTCTGCAACCTCTGG	AGCAGCGTCTCTTCAACCTCTGG	..*.*.*.....*.......	4	0.372876	0.0347511	NC_037105.1	724533	724555	-	intergenic:LOC112259468-LOC112259469
209rev	AGGATCCTCTCTGCAACCTCTGG	AGCAGCGTCTCTTCAACCTCAGG	..*.*.*.....*.......	4	0.372876	0.0347511	NC_037119.1	2801687	2801709	-	intergenic:XM_024385279.1-XM_024385282.1
209rev	AGGATCCTCTCTGCAACCTCTGG	AGCAGCGTCTCTTCAACCTCAGG	..*.*.*.....*.......	4	0.372876	0.0347511	NC_037112.1	25752744	25752766	-	intergenic:XM_024374792.1-XM_024374793.1
209rev	AGGATCCTCTCTGCAACCTCTGG	AGCAGCGTCTCTTCAACCTCAGG	..*.*.*.....*.......	4	0.372876	0.0347511	NC_037105.1	18665286	18665308	+	intergenic:XM_024431307.1/XM_024431306.1-XM_024431308.1
209rev	AGGATCCTCTCTGCAACCTCTGG	AGCAGCGTCTCTTCAACCTCAGG	..*.*.*.....*.......	4	0.372876	0.0347511	NC_037121.1	7456031	7456053	-	intergenic:LOC112224158-XR_002949432.1
209rev	AGGATCCTCTCTGCAACCTCTGG	AGCAGCGTCTCTTCAACCTCAGG	..*.*.*.....*.......	4	0.372876	0.0347511	NC_037106.1	27842904	27842926	-	intron:XM_024435165.1
209rev	AGGATCCTCTCTGCAACCTCTGG	AGCAGCGTCTCTTCAACCTCAGG	..*.*.*.....*.......	4	0.372876	0.0347511	NC_037118.1	21186649	21186671	+	intergenic:XM_024384559.1-XM_024384577.1/XM_024384575.1/XM_024384574.1/XM_024384573.1/XM_024384572.1/XM_024384571.1/XM_024384570.1/XM_024384569.1/XM_024384568.1/XM_024384567.1/XM_024384566.1/XM_024384565.1/XM_024384564.1/XM_024384563.1/XM_024384562.1/XM_024384561.1
209rev	AGGATCCTCTCTGCAACCTCTGG	AGCAGCGTCTCTTCAACCTCAGG	..*.*.*.....*.......	4	0.372876	0.0347511	NC_037100.1	71442115	71442137	+	intron:XM_024419210.1
209rev	AGGATCCTCTCTGCAACCTCTGG	AGCAGCGTCTCTTCAACCTCAGG	..*.*.*.....*.......	4	0.372876	0.0347511	NC_037110.1	41065368	41065390	+	intergenic:XM_024445372.1-XM_024445373.1
209rev	AGGATCCTCTCTGCAACCTCTGG	AGCAGCGTCTCTTCAACCTCAGG	..*.*.*.....*.......	4	0.372876	0.0347511	NC_037126.1	41905660	41905682	+	intergenic:XM_024394913.1/XM_024394912.1/XM_024394911.1-XM_024394915.1
209rev	AGGATCCTCTCTGCAACCTCTGG	AGCAGCGTCTCTTCAACCTCAGG	..*.*.*.....*.......	4	0.372876	0.0347511	NC_037099.1	61718979	61719001	-	intergenic:XR_002952817.1-XM_024408075.1
209rev	AGGATCCTCTCTGCAACCTCTGG	AGCAGCGTCTCTTCAACCTCAGG	..*.*.*.....*.......	4	0.372876	0.0347511	NC_037098.1	22206191	22206213	+	intron:XM_024373335.1
209rev	AGGATCCTCTCTGCAACCTCTGG	AGCAGCGTCTCTTCAACCTCAGG	..*.*.*.....*.......	4	0.372876	0.0347511	NC_037115.1	36110191	36110213	-	intergenic:LOC112218965-XM_024379706.1/XM_024379705.1
209rev	AGGATCCTCTCTGCAACCTCTGG	AGCAGCGTCTCTTCAACCTCAGG	..*.*.*.....*.......	4	0.372876	0.0347511	NW_020129470.1	160326	160348	-	intergenic:LOC112238190-XM_024406764.1
209rev	AGGATCCTCTCTGCAACCTCTGG	AGCAGCGTCTCTTCAACCTCAGG	..*.*.*.....*.......	4	0.372876	0.0347511	NC_037112.1	42879080	42879102	+	intron:XM_024375412.1/XM_024375411.1/XM_024375410.1
209rev	AGGATCCTCTCTGCAACCTCTGG	AGCAGCGTCTCTTCAACCTCAGG	..*.*.*.....*.......	4	0.372876	0.0347511	NC_037121.1	7019168	7019190	-	intron:XM_024388432.1
209rev	AGGATCCTCTCTGCAACCTCTGG	AGCAGCGTCTCTTCAACCTCCGG	..*.*.*.....*.......	4	0.372876	0.0347511	NW_020142510.1	4236700	4236722	-	intergenic:XM_024413316.1/XM_024413317.1-XM_024413318.1
209rev	AGGATCCTCTCTGCAACCTCTGG	AGCAGCGTCTCTTCAACCTCAGG	..*.*.*.....*.......	4	0.372876	0.0347511	NC_037102.1	22169961	22169983	-	intergenic:XM_024423485.1-XR_002953833.1
209rev	AGGATCCTCTCTGCAACCTCTGG	AGCAGCGTCTCTTCAACCTCAGG	..*.*.*.....*.......	4	0.372876	0.0347511	NC_037098.1	49439813	49439835	-	intergenic:LOC112221063-XM_024383161.1
209rev	AGGATCCTCTCTGCAACCTCTGG	AGCAGCGTCTCTTCAACCTCCGG	..*.*.*.....*.......	4	0.372876	0.0347511	NC_037102.1	33725361	33725383	+	intergenic:XM_024423824.1-XM_024423825.1/XM_024423826.1
209rev	AGGATCCTCTCTGCAACCTCTGG	AGCAGCGTCTCTTCAACCTCAGG	..*.*.*.....*.......	4	0.372876	0.0347511	NC_037104.1	24287415	24287437	-	intergenic:XM_024429435.1/XM_024429434.1-XM_024429435.1
209rev	AGGATCCTCTCTGCAACCTCTGG	AGCAGCGTCTCTTCAACCTCAGG	..*.*.*.....*.......	4	0.372876	0.0347511	NC_037112.1	38959061	38959083	+	intergenic:XM_024375263.1/XM_024375262.1-XM_024375266.1
209rev	AGGATCCTCTCTGCAACCTCTGG	AGCAGCGTCTCTTCAACCTCAGG	..*.*.*.....*.......	4	0.372876	0.0347511	NC_037097.1	22917258	22917280	-	intergenic:XR_002950375.1-XM_024417422.1/XM_024417414.1/XM_024417405.1
209rev	AGGATCCTCTCTGCAACCTCTGG	AGCAGCGTCTCTTCAACCTCAGG	..*.*.*.....*.......	4	0.372876	0.0347511	NW_020128876.1	874600	874622	+	intergenic:XR_002951026.1-XM_024403674.1
209rev	AGGATCCTCTCTGCAACCTCTGG	AGCAGCGTCTCTTCAACCTCAGG	..*.*.*.....*.......	4	0.372876	0.0347511	NC_037101.1	92422189	92422211	-	intergenic:XM_024422633.1-XM_024422634.1
209rev	AGGATCCTCTCTGCAACCTCTGG	AGCAGCGTCTCTTCAACCTCAGG	..*.*.*.....*.......	4	0.372876	0.0347511	NC_037121.1	6653698	6653720	-	intergenic:XM_024387486.1/XM_024387492.1/XM_024387491.1/XM_024387490.1/XM_024387488.1/XM_024387487.1-XM_024387267.1
209rev	AGGATCCTCTCTGCAACCTCTGG	AGCAGCGTCTCTTCAACCTCAGG	..*.*.*.....*.......	4	0.372876	0.0347511	NC_037109.1	55639127	55639149	-	intergenic:XM_024442764.1/XM_024442763.1/XM_024442762.1/XM_024442761.1-XM_024443477.1
209rev	AGGATCCTCTCTGCAACCTCTGG	AGCAGCGTCTCTTCAACCTCAGG	..*.*.*.....*.......	4	0.372876	0.0347511	NW_020128821.1	2126911	2126933	+	intron:XM_024401607.1
209rev	AGGATCCTCTCTGCAACCTCTGG	AGCAGCGTCTCTTCAACCTCAGG	..*.*.*.....*.......	4	0.372876	0.0347511	NC_037122.1	8872254	8872276	+	intron:XR_002949505.1
209rev	AGGATCCTCTCTGCAACCTCTGG	AGCAGCGTCTCTTCAACCTCAGG	..*.*.*.....*.......	4	0.372876	0.0347511	NW_020128812.1	738102	738124	-	intron:XM_024400391.1/XM_024400389.1/XM_024400388.1
209rev	AGGATCCTCTCTGCAACCTCTGG	AGCAGCGTCTCTTCAACCTCAGG	..*.*.*.....*.......	4	0.372876	0.0347511	NC_037118.1	5057622	5057644	+	intergenic:XM_024383781.1-XM_024383783.1
209rev	AGGATCCTCTCTGCAACCTCTGG	AGCAGCGTCTCTTCAACCTCAGG	..*.*.*.....*.......	4	0.372876	0.0347511	NC_037114.1	194781	194803	+	intergenic:XM_024378643.1-XM_024377548.1
209rev	AGGATCCTCTCTGCAACCTCTGG	AGCAGCGTCTCTTCAACCTCAGG	..*.*.*.....*.......	4	0.372876	0.0347511	NC_037103.1	59984571	59984593	+	intergenic:XM_024427372.1-XM_024427375.1/XM_024427374.1/XM_024427373.1/XR_002954175.1
[truncated: 7,173 more rows]

## Sheet: gRNA224FwOfT2
																			Average(F+G)	Stdev(F+G)
224forw	GCGTTCCAGAGGTTGCAGAGAGG	GAGGTCCACAGGTTGCAGAGAGG	.*.*....*...........	3	1.55408	0.244755	NC_037103.1	73101897	73101919	-	intergenic:XM_024427939.1-XM_024427943.1								1.79884	0.925835
224forw	GCGTTCCAGAGGTTGCAGAGAGG	GGGATCCAGATGTTGCAGAGGGG	.*.*......*.........	3	1.48312	0.127409	NC_037110.1	42342485	42342507	+	intron:XR_002956059.1/XM_024445401.1/XM_024445400.1								1.61053	0.958634
224forw	GCGTTCCAGAGGTTGCAGAGAGG	ACTTTCCAGAGGATGCAGAGAGG	*.*.........*.......	3	1.13459	0.311538	NC_037102.1	50489437	50489459	+	intergenic:XM_024425377.1/XM_024425376.1-XM_024424301.1								1.44613	0.581988
224forw	GCGTTCCAGAGGTTGCAGAGAGG	GGGCTCCTGTGGTTGCAGAGGGG	.*.*...*.*..........	4	1.25711	0.170216	NC_037103.1	51297650	51297672	+	exon:XM_024427078.1/XM_024427077.1								1.42733	0.768551
224forw	GCGTTCCAGAGGTTGCAGAGAGG	TCTTCTCAGAGGTTGCAGAGGGG	*.*.**..............	4	0.778439	0.464286	NC_037126.1	3850184	3850206	-	intron:XM_024394973.1								1.24272	0.22214
224forw	GCGTTCCAGAGGTTGCAGAGAGG	ACATCCCAGAGGCTGCAGAGTGG	*.*.*.......*.......	4	0.573581	0.532895	NC_037128.1	2645379	2645401	+	intergenic:XM_024396462.1-XM_024396464.1								1.10648	0.0287692
224forw	GCGTTCCAGAGGTTGCAGAGAGG	GGGAGACAGAGGTTGCAGAGGGG	.*.***..............	4	0.789492	0.196865	NC_037125.1	32912345	32912367	-	intron:XM_024393190.1								0.986357	0.419051
224forw	GCGTTCCAGAGGTTGCAGAGAGG	GCGCTACAGAGGTTGCAGTGCGG	...*.*............*.	3	0.600485	0.323529	NC_037114.1	23249305	23249327	-	intergenic:XM_024378228.1/XM_024378227.1-XM_024378225.1								0.924014	0.195837
224forw	GCGTTCCAGAGGTTGCAGAGAGG	GCGCTACAGAGGTTGCAGTGCGG	...*.*............*.	3	0.600485	0.323529	NW_020142545.1	40769	40791	-	intergenic:XM_024415304.1-XM_024415303.1								0.924014	0.195837
224forw	GCGTTCCAGAGGTTGCAGAGAGG	GCTTGTCAGGGGTTGCAGAGAGG	..*.**...*..........	4	0.749905	0.165079	NC_037097.1	15028341	15028363	+	intergenic:XM_024436166.1-XM_024401278.1								0.914984	0.413534
224forw	GCGTTCCAGAGGTTGCAGAGAGG	GCTTGTCAGGGGTTGCAGAGAGG	..*.**...*..........	4	0.749905	0.165079	NC_037117.1	30647652	30647674	+	intergenic:XM_024382423.1-XM_024383384.1								0.914984	0.413534
224forw	GCGTTCCAGAGGTTGCAGAGAGG	GCGCTGCAGAGGTTGCAGTGCGG	...*.*............*.	3	0.600485	0.174208	NC_037109.1	8838381	8838403	-	intron:XM_024443410.1								0.774693	0.301423
224forw	GCGTTCCAGAGGTTGCAGAGAGG	TCGTCCCAGAGGTTGCAGTAGGG	*...*.............**	4	0.219696	0.504808	NW_020128809.1	291642	291664	-	exon:XM_024400021.1								0.724504	0.201605
224forw	GCGTTCCAGAGGTTGCAGAGAGG	GTGGTCCAGAGCTTGCAGAATGG	.*.*.......*.......*	4	0.343144	0.282002	NC_037122.1	39240652	39240674	-	intergenic:XM_024389728.1/XM_024389729.1/XM_024389727.1-XM_024389743.1								0.625146	0.0432339
224forw	GCGTTCCAGAGGTTGCAGAGAGG	GCGTCCCCGAGGCTGCAGAACGG	....*..*....*......*	4	0.255517	0.317199	NW_020129004.1	434473	434495	+	intergenic:XM_024404852.1-Gap								0.572716	0.0436161
224forw	GCGTTCCAGAGGTTGCAGAGAGG	GCATTCCTGAGGTTACAGAACGG	..*....*......*....*	4	0.17447	0.283613	NC_037105.1	31141858	31141880	-	intron:XM_024431747.1/XM_024431746.1/XM_024431745.1/XM_024431744.1								0.458083	0.0771763
224forw	GCGTTCCAGAGGTTGCAGAGAGG	GCGTCCCAGAGGCTGAAGTGGGG	....*.......*..*..*.	4	0.0315178	0.425101	NC_037112.1	5334493	5334515	-	intron:LOC112215333								0.456619	0.278305
224forw	GCGTTCCAGAGGTTGCAGAGAGG	GCGTCCCAGAGGCTGAAGTGGGG	....*.......*..*..*.	4	0.0315178	0.425101	NW_020128806.1	654837	654859	-	intron:LOC112232686								0.456619	0.278305
224forw	GCGTTCCAGAGGTTGCAGAGAGG	GGGGTCCAGATTTTGCAGAGTGG	.*.*......**........	4	0.390673	0.064317	NC_037109.1	33007671	33007693	-	intergenic:XR_002955846.1/XR_002955845.1-XR_002955845.1								0.45499	0.230769
224forw	GCGTTCCAGAGGTTGCAGAGAGG	TTGTTCCAGAGATTCCAGAGAGG	**.........*..*.....	4	0.198201	0.231405	NC_037098.1	36589387	36589409	-	exon:XM_024379267.1								0.429606	0.0234786
224forw	GCGTTCCAGAGGTTGCAGAGAGG	GTGTATCAGAGGTTGCTGAGAGG	.*..**..........*...	4	0.368798	0.0562771	NC_037114.1	35991137	35991159	+	intergenic:XM_024378618.1-XM_024378546.1/XM_024378545.1/XM_024378544.1								0.425075	0.220986
224forw	GCGTTCCAGAGGTTGCAGAGAGG	GCCTCCCTGAGGTTGAAGAGAGG	..*.*..*.......*....	4	0.254925	0.164835	NC_037111.1	34598634	34598656	-	intron:XM_024373842.1								0.41976	0.0637029
224forw	GCGTTCCAGAGGTTGCAGAGAGG	GCCTCCCTGAGGTTGAAGAGGGG	..*.*..*.......*....	4	0.254925	0.164835	NW_020132109.1	15554	15576	+	intergenic:Gap-XM_024409908.1								0.41976	0.0637029
224forw	GCGTTCCAGAGGTTGCAGAGAGG	GCGAGCGAGAGGGTGCAGAGAGG	...**.*.....*.......	4	0.37817	0.0374132	NC_037115.1	48877494	48877516	-	intergenic:XR_002948694.1-XM_024380258.1								0.415583	0.240952
224forw	GCGTTCCAGAGGTTGCAGAGAGG	GGTTTACAGAGGGTGCAGAGGGG	.**..*......*.......	4	0.330293	0.084256	NC_037097.1	13489038	13489060	-	intron:XM_024396321.1/XM_024396270.1/XM_024396198.1/XM_024396119.1								0.414549	0.173974
224forw	GCGTTCCAGAGGTTGCAGAGAGG	GGGTTACAGACGTTACAGAGGGG	.*...*....*...*.....	4	0.135266	0.260556	NC_037122.1	17447624	17447646	-	intron:XM_024389077.1								0.395823	0.0885935
224forw	GCGTTCCAGAGGTTGCAGAGAGG	GGGGTGCAGAGGGTGCAGAGGGG	.*.*.*......*.......	4	0.334982	0.0567108	NC_037097.1	4245671	4245693	-	intergenic:XM_024432251.1-XM_024444816.1/XM_024444899.1								0.391693	0.196768
224forw	GCGTTCCAGAGGTTGCAGAGAGG	CCGTTCCACAGGCTACAGAGAGG	*.......*...*.*.....	4	0.0952563	0.285782	NW_020129793.1	145896	145918	+	intergenic:LOC112239008-Gap								0.381039	0.134722
224forw	GCGTTCCAGAGGTTGCAGAGAGG	CCAGTCCAGAGGTTGTAGAGGGG	*.**...........*....	4	0.268521	0.103022	NC_037107.1	45283447	45283469	-	intergenic:XM_024437841.1-XM_024437842.1								0.371543	0.117025
224forw	GCGTTCCAGAGGTTGCAGAGAGG	CCAGTCCAGAGGTTGTAGAGGGG	*.**...........*....	4	0.268521	0.103022	NC_037124.1	34322510	34322532	+	intergenic:XM_024392077.1-XM_024390787.1								0.371543	0.117025
224forw	GCGTTCCAGAGGTTGCAGAGAGG	CCAGTCCAGAGGTTGTAGAGGGG	*.**...........*....	4	0.268521	0.103022	NC_037120.1	13293881	13293903	+	intergenic:XM_024386652.1-XM_024386268.1								0.371543	0.117025
224forw	GCGTTCCAGAGGTTGCAGAGAGG	GCATTTCAGAGCTTGCAAAGCGG	..*..*.....*.....*..	4	0.0910806	0.255252	NC_037113.1	2191660	2191682	-	intron:XM_024376720.1/XM_024376719.1								0.346333	0.116087
224forw	GCGTTCCAGAGGTTGCAGAGAGG	GCGGTGGAGAGGCTGCAGAGCGG	...*.**.....*.......	4	0.228793	0.116099	NC_037112.1	2912073	2912095	+	intergenic:XM_024374228.1-LOC112216471								0.344892	0.0796866
224forw	GCGTTCCAGAGGTTGCAGAGAGG	GCGGTGGAGAGGCTGCAGAGCGG	...*.**.....*.......	4	0.228793	0.116099	NC_037112.1	2912054	2912076	+	intergenic:XM_024374228.1-LOC112216471								0.344892	0.0796866
224forw	GCGTTCCAGAGGTTGCAGAGAGG	GCGGTGGAGAGGCTGCAGAGCGG	...*.**.....*.......	4	0.228793	0.116099	NC_037112.1	2912111	2912133	+	intergenic:XM_024374228.1-LOC112216471								0.344892	0.0796866
224forw	GCGTTCCAGAGGTTGCAGAGAGG	GCGGTGGAGAGGCTGCAGAGCGG	...*.**.....*.......	4	0.228793	0.116099	NC_037112.1	2911141	2911163	+	intergenic:XM_024374228.1-LOC112216471								0.344892	0.0796866
224forw	GCGTTCCAGAGGTTGCAGAGAGG	GCGGTGGAGAGGCTGCAGAGCGG	...*.**.....*.......	4	0.228793	0.116099	NC_037112.1	2911160	2911182	+	intergenic:XM_024374228.1-LOC112216471								0.344892	0.0796866
224forw	GCGTTCCAGAGGTTGCAGAGAGG	GCGGTGGAGAGGCTGCAGAGCGG	...*.**.....*.......	4	0.228793	0.116099	NC_037112.1	2912092	2912114	+	intergenic:XM_024374228.1-LOC112216471								0.344892	0.0796866
224forw	GCGTTCCAGAGGTTGCAGAGAGG	GCGGTGGAGAGGCTGCAGAGCGG	...*.**.....*.......	4	0.228793	0.116099	NC_037112.1	2911122	2911144	+	intergenic:XM_024374228.1-LOC112216471								0.344892	0.0796866
224forw	GCGTTCCAGAGGTTGCAGAGAGG	GCGGTGGAGAGGCTGCAGAGCGG	...*.**.....*.......	4	0.228793	0.116099	NC_037112.1	2912013	2912035	+	intergenic:XM_024374228.1-LOC112216471								0.344892	0.0796866
224forw	GCGTTCCAGAGGTTGCAGAGAGG	GCGGTGGAGAGGCTGCAGAGCGG	...*.**.....*.......	4	0.228793	0.116099	NC_037112.1	2911179	2911201	+	intergenic:XM_024374228.1-LOC112216471								0.344892	0.0796866
224forw	GCGTTCCAGAGGTTGCAGAGAGG	GGGGTGCAGAGGTTGCAAAGAGG	.*.*.*...........*..	4	0.187752	0.150502	NC_037127.1	26070766	26070788	+	intergenic:XM_024395790.1/XM_024395789.1-XM_024395794.1/XM_024395793.1/XM_024395792.1/XM_024395791.1								0.338253	0.0263397
224forw	GCGTTCCAGAGGTTGCAGAGAGG	GGGTACTAGAGGTAGCAGAGGGG	.*..*.*......*......	4	0.152973	0.174948	NC_037099.1	14297122	14297144	-	intergenic:XM_024412449.1-XM_024394974.1								0.327921	0.0155392
224forw	GCGTTCCAGAGGTTGCAGAGAGG	GGGTACTAGAGGTAGCAGAGGGG	.*..*.*......*......	4	0.152973	0.174948	NC_037119.1	11231999	11232021	-	exon:XM_024385804.1/XM_024385803.1/XM_024385802.1								0.327921	0.0155392
224forw	GCGTTCCAGAGGTTGCAGAGAGG	GCATACCACAGGTTGCAGAGGGA	..*.*...*...........	3	0.306465	0.0140224	NC_037115.1	19955721	19955743	-	intron:XM_024380408.1								0.320488	0.206788
224forw	GCGTTCCAGAGGTTGCAGAGAGG	GTGTCCCAGGGGTTGGAGAGTGG	.*..*....*.....*....	4	0.238119	0.0777001	NC_037110.1	49203005	49203027	-	intergenic:XM_024445711.1-XM_024445712.1								0.315819	0.113434
224forw	GCGTTCCAGAGGTTGCAGAGAGG	GCCTACCAGAGGTTGCAGAATGA	..*.*..............*	3	0.275558	0.01252	NC_037108.1	10674644	10674666	+	exon:XM_024440551.1								0.288078	0.185996
224forw	GCGTTCCAGAGGTTGCAGAGAGG	GTGTTCCATCGGTTGCAAAGTGG	.*......**.......*..	4	0.174634	0.111888	NC_037117.1	10530575	10530597	+	intergenic:XR_002948942.1-XM_024382811.1/XM_024382810.1/XM_024382809.1/XM_024382808.1								0.286522	0.0443682
224forw	GCGTTCCAGAGGTTGCAGAGAGG	GGTTTCCAGAGGCTGCAGAGAAG	.**.........*.......	3	0.214817	0.0711925	NC_037102.1	69711592	69711614	-	intron:XM_024425051.1								0.286009	0.101558
224forw	GCGTTCCAGAGGTTGCAGAGAGG	GCCTGCCTGAGGTTGGAGAGGGG	..*.*..*.......*....	4	0.254925	0.0162299	NC_037106.1	125643	125665	-	intergenic:XM_024434297.1-LOC112260949								0.271155	0.168783
224forw	GCGTTCCAGAGGTTGCAGAGAGG	GTGGTCCAGAGGGTGCTGAGAGG	.*.*........*...*...	4	0.235909	0.0197628	NC_037115.1	7102565	7102587	-	intergenic:XM_024378924.1/XM_024378922.1/XM_024378921.1/XM_024378923.1-XM_024378925.1								0.255672	0.152838
224forw	GCGTTCCAGAGGTTGCAGAGAGG	GGCTTCCAGAGGTTCCAGATGGG	.**...........*....*	4	0.184299	0.0510794	NC_037110.1	27431690	27431712	+	exon:XM_024444742.1								0.235378	0.0942005
224forw	GCGTTCCAGAGGTTGCAGAGAGG	GCGTGCAGGAGGTTGGAGAGGGG	....*.**.......*....	4	0.168076	0.0541538	NC_037106.1	16618014	16618036	+	intergenic:XM_024436375.1-XR_002954978.1/XM_024434866.1/XR_002954980.1/XM_024434868.1								0.222229	0.0805548
224forw	GCGTTCCAGAGGTTGCAGAGAGG	GTGTTCCAGAGGTTCTAGAGTGG	.*............**....	3	0.145244	0.0762873	NW_020142537.1	759192	759214	+	intergenic:XR_002952929.1/XR_002952928.1-XM_024414688.1								0.221532	0.04876
224forw	GCGTTCCAGAGGTTGCAGAGAGG	GTGTTCCAGAGGTTCTAGAGTGG	.*............**....	3	0.145244	0.0762873	NW_020142537.1	1605683	1605705	-	intergenic:XM_024414673.1-XR_002952931.1/XR_002952930.1								0.221532	0.04876
224forw	GCGTTCCAGAGGTTGCAGAGAGG	GACTGCCAGAGGTGGCAGAGGGG	.**.*........*......	4	0.220836	0	NC_037126.1	3532035	3532057	+	intergenic:XR_002950022.1/XR_002950021.1/XR_002950020.1-XR_002950024.1/XR_002950023.1								0.220836	0.156155
224forw	GCGTTCCAGAGGTTGCAGAGAGG	ATCTTCCAGAGGTGGCAGAGTGG	***..........*......	4	0.220836	0	NC_037105.1	17724161	17724183	+	intergenic:XM_024431279.1/XM_024431278.1-XM_024431278.1								0.220836	0.156155
224forw	GCGTTCCAGAGGTTGCAGAGAGG	GCCATCCAGAGGGTGCAGAGTGA	..**........*.......	3	0.214817	0.00331794	NC_037110.1	19289495	19289517	+	exon:XM_024445768.1								0.218134	0.149552
224forw	GCGTTCCAGAGGTTGCAGAGAGG	GCCATCCAGAGGGTGCAGAGTGA	..**........*.......	3	0.214817	0.00331794	NC_037110.1	18946138	18946160	-	exon:XM_024445767.1								0.218134	0.149552
224forw	GCGTTCCAGAGGTTGCAGAGAGG	GCGCTCCAGAGATGGCAGAGAGG	...*.......*.*......	3	0.206348	0	NC_037123.1	17630655	17630677	-	intergenic:XM_024390730.1-XM_024389898.1								0.206348	0.14591
224forw	GCGTTCCAGAGGTTGCAGAGAGG	GCGCTCCAGAGATGGCAGAGAGG	...*.......*.*......	3	0.206348	0	NC_037105.1	83710303	83710325	-	intergenic:XM_024433492.1-XM_024433494.1								0.206348	0.14591
224forw	GCGTTCCAGAGGTTGCAGAGAGG	GTGTTCCAGAGGTTACAGGCAGG	.*............*...**	4	0.0588785	0.13751	NC_037116.1	17532066	17532088	-	exon:XM_024382011.1/XM_024382010.1/XM_024382009.1								0.196388	0.0556006
224forw	GCGTTCCAGAGGTTGCAGAGAGG	GCATTGCAGAGGTTGAAGGGTGG	..*..*.........*..*.	4	0.0511733	0.140625	NC_037109.1	35630427	35630449	+	intergenic:XR_002955913.1-XM_024441975.1/XM_024441974.1								0.191798	0.0632519
224forw	GCGTTCCAGAGGTTGCAGAGAGG	ACATTCCAGAGGATGGAGAGAGG	*.*.........*..*....	4	0.103917	0.0718935	NC_037099.1	70061889	70061911	-	intron:XM_024388215.1								0.175811	0.0226444
224forw	GCGTTCCAGAGGTTGCAGAGAGG	GGGTGCCAGAGGGTGCACAGAGG	.*..*.......*....*..	4	0.120099	0.0553065	NW_020128813.1	3379564	3379586	-	intergenic:XM_024400696.1-XM_024400699.1/XM_024400698.1								0.175406	0.0458152
224forw	GCGTTCCAGAGGTTGCAGAGAGG	GGGTGCCAGAGGGTGCACAGAGG	.*..*.......*....*..	4	0.120099	0.0553065	NC_037107.1	26385354	26385376	+	intergenic:XM_024437288.1/XM_024437287.1-XM_024437305.1								0.175406	0.0458152
224forw	GCGTTCCAGAGGTTGCAGAGAGG	GCGCTGCAGAGGCTGCTGAGTGG	...*.*......*...*...	4	0.135498	0.0340557	NC_037109.1	18836580	18836602	-	intergenic:XM_024441363.1-XM_024441364.1								0.169554	0.0717307
224forw	GCGTTCCAGAGGTTGCAGAGAGG	TCGTTCCAGAGAATTCAGAGAGG	*..........**.*.....	4	0.0767039	0.0923077	NC_037101.1	26078863	26078885	+	intergenic:XM_024422487.1-XM_024420355.1/XM_024420357.1								0.169012	0.0110336
224forw	GCGTTCCAGAGGTTGCAGAGAGG	TCGTTCCAGAGAATTCAGAGAGG	*..........**.*.....	4	0.0767039	0.0923077	NW_020128811.1	339111	339133	+	intergenic:XM_024400281.1-XM_024400303.1/XM_024400304.1								0.169012	0.0110336
224forw	GCGTTCCAGAGGTTGCAGAGAGG	TCGTTCCAGAGAATTCAGAGAGG	*..........**.*.....	4	0.0767039	0.0923077	NC_037101.1	43182580	43182602	+	intergenic:XM_024422508.1-XM_024420866.1/XM_024420867.1								0.169012	0.0110336
224forw	GCGTTCCAGAGGTTGCAGAGAGG	GCCTTACAGAGATTTCAGAGCGG	..*..*.....*..*.....	4	0.118233	0.047619	NC_037101.1	37076939	37076961	-	intron:XM_024420654.1								0.165852	0.0499316
224forw	GCGTTCCAGAGGTTGCAGAGAGG	GCCTTACAGAGATTTCAGAGCGG	..*..*.....*..*.....	4	0.118233	0.047619	NW_020142510.1	8255287	8255309	-	intron:XM_024413423.1								0.165852	0.0499316
224forw	GCGTTCCAGAGGTTGCAGAGAGG	GCATTCCAGAGGACACAGAGAGG	..*.........***.....	4	0.0229042	0.139625	NC_037108.1	7653327	7653349	-	intron:LOC112263911								0.162529	0.0825341
224forw	GCGTTCCAGAGGTTGCAGAGAGG	GCCTTCCAGAGAATGCTGAGGGG	..*........**...*...	4	0.108648	0.0331361	NC_037104.1	29118261	29118283	+	intron:XM_024429519.1								0.141784	0.0533947
224forw	GCGTTCCAGAGGTTGCAGAGAGG	GCGCTGCAGAGGTTGCTGTGCGG	...*.*..........*.*.	4	0.116171	0.0232278	NC_037097.1	8095746	8095768	-	intergenic:XM_024426882.1-XM_024428112.1								0.139399	0.065721
224forw	GCGTTCCAGAGGTTGCAGAGAGG	GCGCTGCAGAGGTTGCTGTGCGG	...*.*..........*.*.	4	0.116171	0.0232278	NC_037116.1	38754120	38754142	+	intergenic:XM_024380920.1/XM_024380924.1-XM_024380926.1/XM_024380925.1								0.139399	0.065721
224forw	GCGTTCCAGAGGTTGCAGAGAGG	GCGATAGAGAGGTTGGAGAGAGG	...*.**........*....	4	0.106834	0.0320128	NC_037107.1	37438842	37438864	+	intron:XM_024437906.1								0.138847	0.0529068
224forw	GCGTTCCAGAGGTTGCAGAGAGG	CCGTTACAGAGCTTGGAGAGCGG	*....*.....*...*....	4	0.0810627	0.0540216	NC_037124.1	19902445	19902467	-	exon:XM_024391558.1								0.135084	0.019121
224forw	GCGTTCCAGAGGTTGCAGAGAGG	GCGTTGCATAGCTAGCAGAGGGG	.....*..*..*.*......	4	0.0369881	0.087395	NC_037116.1	33401288	33401310	-	intron:XM_024380650.1								0.124383	0.035643
224forw	GCGTTCCAGAGGTTGCAGAGAGG	GCATTCCAGATGCTTCAGAGAGG	..*.......*.*.*.....	4	0.0853144	0.0325333	NW_020129034.1	151117	151139	-	intron:XM_024405062.1								0.117848	0.0373219
224forw	GCGTTCCAGAGGTTGCAGAGAGG	GAGTTGCAGAGGGTGCACAGAGG	.*...*......*....*..	4	0.0726599	0.0451722	NC_037101.1	10573676	10573698	+	exon:XM_024419844.1								0.117832	0.0194367
224forw	GCGTTCCAGAGGTTGCAGAGAGG	GCGTGCCAGAGTTTACAGCGCGG	....*......*..*...*.	4	0.0624334	0.0479326	NW_020129067.1	155485	155507	+	intergenic:XR_002951252.1-Gap								0.110366	0.0102536
224forw	GCGTTCCAGAGGTTGCAGAGAGG	GTGTTCCAGAGGTTACTTAGAGG	.*............*.**..	4	0.0320202	0.0760547	NC_037110.1	40865618	40865640	+	intergenic:XM_024445369.1/XM_024445368.1/XM_024445367.1/XM_024445363.1/XM_024445370.1/XM_024445365.1/XM_024445364.1/XM_024445362.1-XM_024445372.1								0.108075	0.0311371
224forw	GCGTTCCAGAGGTTGCAGAGAGG	GTGTTCCAGAGGGTTCAGAAGGG	.*..........*.*....*	4	0.0723364	0.0317617	NW_020130168.1	45495	45517	-	intron:XM_024408164.1								0.104098	0.0286907
224forw	GCGTTCCAGAGGTTGCAGAGAGG	CAGTTCCAGAGGTGGCAGAATGG	**...........*.....*	4	0.10392	0	NC_037102.1	62112657	62112679	+	intron:XM_024424855.1								0.10392	0.0734823
224forw	GCGTTCCAGAGGTTGCAGAGAGG	GCGTTCTAGAGGTTGACGTGCGG	......*........**.*.	4	0.0214154	0.0772059	NC_037100.1	21127700	21127722	+	exon:XM_024417308.1								0.0986213	0.0394498
224forw	GCGTTCCAGAGGTTGCAGAGAGG	GCGTTCCAGAAGCTGCTGACAGG	..........*.*...*..*	4	0.0493351	0.0451128	NC_037101.1	83188576	83188598	+	intron:XM_024422304.1								0.0944479	0.00298565
224forw	GCGTTCCAGAGGTTGCAGAGAGG	GCGTACGAGAGGATGGAGAGAGG	....*.*.....*..*....	4	0.0650453	0.0250609	NC_037124.1	2749739	2749761	-	intron:XR_002949731.1								0.0901062	0.0282732
224forw	GCGTTCCAGAGGTTGCAGAGAGG	GAGCTCCAGAGGTTGGACAGCGG	.*.*...........*.*..	4	0.0533773	0.0344753	NC_037102.1	43065592	43065614	-	intron:XM_024424099.1/XM_024424098.1								0.0878527	0.0133657
224forw	GCGTTCCAGAGGTTGCAGAGAGG	GCGGTCCAGAGCTTCCAGCGGGG	...*.......*..*...*.	4	0.0657632	0.0186705	NC_037114.1	182634	182656	-	intergenic:XM_024378643.1-XM_024377548.1								0.0844337	0.0332996
224forw	GCGTTCCAGAGGTTGCAGAGAGG	GCGTTACAGAGGCAGGAGAGGGG	.....*......**.*....	4	0.00858493	0.0698174	NC_037121.1	9620367	9620389	+	intergenic:XR_002949439.1-XR_002949440.1								0.0784023	0.0432979
224forw	GCGTTCCAGAGGTTGCAGAGAGG	GCCTGCCAGAGGTTTGAGAGGGG	..*.*.........**....	4	0.0683198	0.00540997	NC_037101.1	34551116	34551138	-	intergenic:XM_024420582.1/XM_024420577.1/XM_024420581.1/XM_024420580.1/XM_024420578.1-XM_024420584.1								0.0737298	0.044484
224forw	GCGTTCCAGAGGTTGCAGAGAGG	GCGTTGCAGAGGCTGCTGTGCGG	.....*......*...*.*.	4	0.0426819	0.0283401	NW_020128834.1	408792	408814	+	intergenic:XM_024402416.1-XM_024402387.1								0.071022	0.0101412
224forw	GCGTTCCAGAGGTTGCAGAGAGG	GCCTTCCACAGGTTGGAGTGCGG	..*.....*......*..*.	4	0.0516808	0.0171563	NC_037109.1	40318549	40318571	+	intergenic:XM_024442143.1/XM_024442142.1/XM_024442144.1-XM_024442144.1/XM_024442143.1/XM_024442142.1								0.0688371	0.0244126
224forw	GCGTTCCAGAGGTTGCAGAGAGG	GCGTTCCAGAGGAAAGAGAGGGG	............****....	4	0.00346859	0.0620556	NC_037108.1	33316171	33316193	-	intergenic:LOC112264111-XM_024439167.1								0.0655242	0.0414273
224forw	GCGTTCCAGAGGTTGCAGAGAGG	GCGTTCCAGAGGAAAGAGAGGGG	............****....	4	0.00346859	0.0620556	NC_037099.1	5970174	5970196	-	intergenic:LOC112244234-XM_024391102.1								0.0655242	0.0414273
224forw	GCGTTCCAGAGGTTGCAGAGAGG	GCGTTCCAGAGGAAAGAGAGGGG	............****....	4	0.00346859	0.0620556	NC_037119.1	3718584	3718606	+	intergenic:XM_024385521.1-LOC112222518								0.0655242	0.0414273
224forw	GCGTTCCAGAGGTTGCAGAGAGG	GCGTTCCAGAGGAAAGAGAGGGG	............****....	4	0.00346859	0.0620556	NW_020142558.1	124954	124976	-	intergenic:Gap-XM_024415580.1								0.0655242	0.0414273
224forw	GCGTTCCAGAGGTTGCAGAGAGG	GCGTTCGATAGGTTTAAGAGGGG	......*.*.....**....	4	0.027522	0.0358543	NW_020142558.1	1037711	1037733	-	intron:LOC112246940								0.0633764	0.00589182
224forw	GCGTTCCAGAGGTTGCAGAGAGG	GCGTTCGATAGGTTTAAGAGGGG	......*.*.....**....	4	0.027522	0.0358543	NC_037119.1	2805827	2805849	+	intron:XM_024385282.1								0.0633764	0.00589182
224forw	GCGTTCCAGAGGTTGCAGAGAGG	GGGTTCCAGAGGTTCCCAAGTGG	.*............*.**..	4	0.0320202	0.0231789	NW_020129850.1	34981	35003	+	intergenic:XM_024407620.1-XM_024407617.1								0.0551991	0.00625176
224forw	GCGTTCCAGAGGTTGCAGAGAGG	GCATTCCACAGGTGGCCGAGCGG	..*.....*....*..*...	4	0.0519483	0	NC_037098.1	2109227	2109249	+	exon:XM_024385682.1								0.0519483	0.036733
224forw	GCGTTCCAGAGGTTGCAGAGAGG	GCATTCCACAGGTGGCCGAGCGG	..*.....*....*..*...	4	0.0519483	0	NC_037128.1	1827615	1827637	-	intergenic:XM_024396435.1/XM_024396434.1/XM_024396433.1-XR_002950273.1								0.0519483	0.036733
224forw	GCGTTCCAGAGGTTGCAGAGAGG	GCGCTCCAGAGGGTGGAGGGTGG	...*........*..*..*.	4	0.0331988	0.00973834	NC_037109.1	71051965	71051987	+	intergenic:XM_024443275.1-XR_002955872.1								0.0429371	0.016589
224forw	GCGTTCCAGAGGTTGCAGAGAGG	GCTTTCCAGACGTCTCAGAGAGG	..*.......*..**.....	4	0.0328471	0.00874636	NC_037125.1	7941484	7941506	-	exon:XM_024392290.1								0.0415935	0.0170418
224forw	GCGTTCCAGAGGTTGCAGAGAGG	GTGTTCCAGATGTGGCAGTGGGG	.*........*..*....*.	4	0.0412441	0	NC_037099.1	60820606	60820628	+	exon:XR_002951773.1/XM_024407695.1								0.0412441	0.029164
224forw	GCGTTCCAGAGGTTGCAGAGAGG	GCGTTCCAGATGCTGTGGAGCGG	..........*.*..**...	4	0.0194137	0.0164874	NW_020135117.1	698	720	+	intergenic:Gap-XM_024410840.1								0.0359011	0.00206915
224forw	GCGTTCCAGAGGTTGCAGAGAGG	GCGTTCCACATGTCCCAGAGAGG	........*.*..**.....	4	0.0184829	0.0161377	NC_037117.1	10318692	10318714	+	intergenic:XR_002948942.1/XR_002948941.1-XR_002948941.1								0.0346206	0.00165829
224forw	GCGTTCCAGAGGTTGCAGAGAGG	GCGTGCCAGAGATGGGAGAGGGG	....*......*.*.*....	4	0.01804	0	NW_020130923.1	128525	128547	+	intergenic:XM_024409085.1-LOC112240855								0.01804	0.0127562
224forw	GCGTTCCAGAGGTTGCAGAGAGG	GCGTTCCAGAGGGAGGGGAGGGG	............**.**...	4	0.00498286	0.00438436	NC_037125.1	1179988	1180010	+	intron:XM_024392271.1								0.00936722	0.000423201
224forw	GCGTTCCAGAGGTTGCAGAGAGG	GCGTTCGAGAGGTGAGAGAGGGG	......*......***....	4	0.00671159	0	NC_037099.1	70639761	70639783	-	intergenic:XM_024388241.1-XM_024414253.1								0.00671159	0.00474581
224forw	GCGTTCCAGAGGTTGCAGAGAGG	GCGTTCCAGAGGGGGGAGGGGGG	............**.*..*.	4	0.00426433	0	NC_037097.1	10166391	10166413	-	intergenic:XM_024387529.1/XM_024387612.1-XM_024434841.1								0.00426433	0.00301534
224forw	GCGTTCCAGAGGTTGCAGAGAGG	GCGTTCCAGAGGGGGAAGGGGGG	............**.*..*.	4	0.00426433	0	NC_037115.1	34855072	34855094	-	intergenic:LOC112218989-XM_024379702.1/XM_024379701.1								0.00426433	0.00301534
224forw	GCGTTCCAGAGGTTGCAGAGAGG	GCGTTCCAGAGGTGGTAAACGGG	.............*.*.*.*	4	0.00285905	0	NW_020129157.1	183508	183530	-	intergenic:Gap-XM_024405710.1								0.00285905	0.00202165
